# Supplementary material for: CRISPR targeting reveals a reservoir of common phages associated with the human gut microbiome
Source: HighWire-hosted journal article supplement (doi:10.1101/gr.138297.112), 2012-06-25
Supplement: Stern_DatasetS2.xlsx [file Stern_DatasetS2.xlsx]

## Sheet: spacer2contig
Spacer id	MGE contig	Start match	End match	Spacer length	Alignment length	%id	full_match?		Matching criteria:
MH0002.1	MH0008.scaffold25854_3	460	431	33	30	100	A		Y	Full match
MH0002.1	MH0011.scaffold9729_3	19766	19737	33	30	100	A		A	Almost full match (>=90% identity, up to 5 difference between Spacer length and alignment length
MH0002.1	MH0012.scaffold46383_11	277	306	33	30	100	A		N	Not fully matching
MH0002.1	MH0025.C3558652_1	77	106	33	30	100	A
MH0002.1	MH0026.scaffold30447_1	2477	2448	33	30	100	A
MH0002.1	MH0037.scaffold838_3	2296	2325	33	30	100	A
MH0002.1	MH0039.scaffold82116_1	69	98	33	30	100	A
MH0002.1	MH0045.scaffold90975_1	245	216	33	30	100	A
MH0002.1	MH0052.C2494886_1	429	400	33	30	100	A
MH0002.1	MH0060.scaffold753_4	1070	1099	33	30	100	A
MH0002.1	MH0063.scaffold69451_3	185	156	33	30	100	A
MH0002.1	MH0064.scaffold7856_4	6801	6772	33	30	100	A
MH0002.1	MH0069.scaffold88901_1	833	804	33	30	100	A
MH0002.1	MH0072.scaffold213_11	34	5	33	30	100	A
MH0002.1	MH0080.C3188311_1	473	444	33	30	100	A
MH0002.1	MH0081.C3631215_1	498	469	33	30	100	A
MH0002.1	MH0082.scaffold89363_2	162	133	33	30	100	A
MH0002.1	MH0083.scaffold19413_2	16208	16179	33	30	100	A
MH0002.1	MH0085.scaffold1996_1	10388	10417	33	30	100	A
MH0002.1	O2.UC-13.scaffold12381_1	834	805	33	30	100	A
MH0002.1	O2.UC-19.scaffold7716_1	6580	6609	33	30	100	A
MH0002.1	O2.UC-21.scaffold67582_1	1440	1411	33	30	100	A
MH0002.1	V1.CD-13.C4339595_1	485	456	33	30	100	A
MH0002.1	V1.CD-14.scaffold399_3	1070	1099	33	30	100	A
MH0002.1	V1.CD-4.C3650723_1	1683	1654	33	30	100	A
MH0002.1	V1.UC-21.scaffold20387_5	2198	2227	33	30	100	A
MH0002.10	MH0003.scaffold39547_6	10900	10930	33	31	96.77	A
MH0002.10	MH0010.C1325250_1	2493	2463	33	31	93.55	A
MH0002.10	MH0012.scaffold69297_2	2472	2442	33	31	93.55	A
MH0002.10	MH0015.C1737231_1	2493	2463	33	31	93.55	A
MH0002.10	MH0028.scaffold24740_9	1578	1608	33	31	96.77	A
MH0002.10	MH0037.scaffold37846_7	7051	7081	33	31	100	A
MH0002.10	MH0039.scaffold84652_4	647	617	33	31	93.55	A
MH0002.10	MH0048.scaffold71187_1	11972	11942	33	31	96.77	A
MH0002.10	MH0054.C3311096_1	748	718	33	31	93.55	A
MH0002.10	MH0059.scaffold61759_5	228	258	33	31	100	A
MH0002.10	MH0085.scaffold37908_3	23605	23575	33	31	93.55	A
MH0002.10	MH0086.scaffold96474_2	15482	15452	33	31	100	A
MH0002.10	O2.UC-17.C8737962_1	308	278	33	31	96.77	A
MH0002.10	V1.CD-4.scaffold10755_1	394	416	33	23	100	N
MH0002.10	V1.CD-9.scaffold79898_3	418	388	33	31	96.77	A
MH0002.101	O2.UC-18.scaffold22307_1	5521	5484	40	38	100	A
MH0002.102	MH0007.C1982834_1	451	484	39	34	100	A
MH0002.102	V1.UC-19.scaffold27661_5	5471	5498	39	28	100	N
MH0002.104	MH0002.scaffold16635_2	603	636	36	34	100	A
MH0002.104	MH0006.scaffold144779_1	5377	5409	36	33	100	A
MH0002.104	MH0011.scaffold32907_4	18596	18564	36	33	100	A
MH0002.104	MH0012.scaffold3828_4	199	231	36	33	100	A
MH0002.104	MH0022.scaffold9075_2	274	306	36	33	100	A
MH0002.104	MH0024.scaffold41394_6	411	379	36	33	100	A
MH0002.104	MH0025.scaffold19840_1	1752	1720	36	33	100	A
MH0002.104	MH0031.scaffold20807_3	3586	3554	36	33	100	A
MH0002.104	MH0035.scaffold51011_4	726	693	36	34	100	A
MH0002.104	MH0043.scaffold6103_9	349	317	36	33	100	A
MH0002.104	MH0048.C2504555_1	336	368	36	33	100	A
MH0002.104	MH0050.scaffold14152_3	6426	6394	36	33	100	A
MH0002.104	MH0053.scaffold90078_8	613	646	36	34	100	A
MH0002.104	MH0056.scaffold2895_12	952	920	36	33	100	A
MH0002.104	MH0058.scaffold89120_2	1431	1399	36	33	100	A
MH0002.104	MH0060.scaffold4136_7	69	37	36	33	100	A
MH0002.104	MH0065.scaffold69245_4	704	736	36	33	100	A
MH0002.104	MH0069.scaffold14506_2	6034	6066	36	33	100	A
MH0002.104	MH0070.scaffold7304_2	61	29	36	33	100	A
MH0002.104	O2.UC-1.scaffold11450_3	102	134	36	33	100	A
MH0002.104	O2.UC-21.scaffold2003_5	151	119	36	33	100	A
MH0002.104	V1.CD-13.scaffold36743_2	9392	9424	36	33	100	A
MH0002.107	MH0002.scaffold33362_4	3598	3565	36	34	100	A
MH0002.107	MH0004.scaffold38545_6	278	311	36	34	100	A
MH0002.107	MH0006.scaffold228754_1	1	28	36	28	96.43	N
MH0002.107	MH0009.scaffold2785_2	1962	1929	36	34	100	A
MH0002.107	MH0014.scaffold21166_5	4044	4011	36	34	100	A
MH0002.107	MH0022.scaffold14548_2	292	325	36	34	100	A
MH0002.107	MH0030.scaffold71245_3	682	649	36	34	100	A
MH0002.107	MH0031.scaffold13020_4	565	532	36	34	100	A
MH0002.107	MH0038.scaffold72811_1	1737	1704	36	34	97.06	A
MH0002.107	MH0040.scaffold49636_1	1	34	36	34	100	A
MH0002.107	MH0043.C4728027_1	976	943	36	34	100	A
MH0002.107	MH0044.scaffold32271_2	893	926	36	34	100	A
MH0002.107	MH0046.scaffold49095_3	575	542	36	34	100	A
MH0002.107	MH0048.scaffold17626_3	295	322	36	28	96.43	N
MH0002.107	MH0049.C2339423_1	530	563	36	34	94.12	A
MH0002.107	MH0050.scaffold5063_2	3113	3140	36	28	96.43	N
MH0002.107	MH0053.scaffold413_14	1215	1182	36	34	100	A
MH0002.107	MH0055.scaffold71835_2	418	451	36	34	100	A
MH0002.107	MH0056.scaffold7277_5	4795	4828	36	34	100	A
MH0002.107	MH0059.scaffold1461_1	254	287	36	34	100	A
MH0002.107	MH0060.scaffold52546_2	565	532	36	34	100	A
MH0002.107	MH0065.scaffold86914_1	1047	1014	36	34	100	A
MH0002.107	MH0066.scaffold34512_1	1	34	36	34	100	A
MH0002.107	MH0070.scaffold12760_2	608	575	36	34	94.12	A
MH0002.107	MH0072.scaffold16383_3	517	550	36	34	94.12	A
MH0002.107	MH0072.scaffold23920_1	1885	1918	36	34	100	A
MH0002.107	MH0073.scaffold80306_1	20	53	36	34	100	A
MH0002.107	MH0074.scaffold413_9	60	93	36	34	100	A
MH0002.107	MH0082.scaffold35127_1	219	252	36	34	100	A
MH0002.107	MH0083.scaffold41653_1	2333	2360	36	28	96.43	N
MH0002.107	MH0085.scaffold2727_1	1221	1254	36	34	100	A
MH0002.107	MH0086.scaffold10615_5	878	911	36	34	100	A
MH0002.107	O2.UC-12.C3473626_1	154	187	36	34	100	A
MH0002.107	O2.UC-24.scaffold43237_2	285	252	36	34	100	A
MH0002.107	V1.CD-9.scaffold24986_2	512	479	36	34	94.12	A
MH0002.107	V1.UC-18.scaffold8042_1	105	72	36	34	100	A
MH0002.107	V1.UC-8.scaffold57310_1	179	206	36	28	96.43	N
MH0002.108	MH0002.scaffold66739_2	395	428	36	34	100	A
MH0002.108	MH0012.scaffold153824_2	29	1	36	29	100	N
MH0002.108	MH0040.scaffold23751_3	1782	1749	36	34	100	A
MH0002.108	MH0055.scaffold19271_2	126	159	36	34	100	A
MH0002.108	MH0058.scaffold88544_5	446	479	36	34	100	A
MH0002.108	MH0083.scaffold54261_5	1087	1120	36	34	100	A
MH0002.108	O2.UC-18.scaffold6278_5	403	436	36	34	100	A
MH0002.108	O2.UC-20.scaffold14348_5	48	73	36	26	100	N
MH0002.108	V1.UC-14.scaffold23723_1	5078	5045	36	34	100	A
MH0002.111	unmapped_K23_L70.scaffold499776_2	1273	1307	35	35	100	Y
MH0002.114	MH0007.C1982834_1	89	111	35	23	100	N
MH0002.114	MH0059.scaffold98_3	2319	2341	35	23	100	N
MH0002.114	V1.UC-14.scaffold87168_1	4994	5015	35	22	100	N
MH0002.119	MH0015.scaffold61757_2	775	754	35	22	100	N
MH0002.12	MH0003.scaffold39547_2	22816	22845	33	30	100	A
MH0002.12	MH0010.C1326540_1	4738	4767	33	30	100	A
MH0002.12	MH0012.scaffold17168_2	8071	8042	33	30	100	A
MH0002.12	MH0015.C1737225_1	3215	3186	33	30	100	A
MH0002.12	MH0028.scaffold24740_2	568	593	33	26	100	N
MH0002.12	MH0037.scaffold37846_4	21443	21465	33	23	100	N
MH0002.12	MH0039.scaffold86388_1	1026	1055	33	30	100	A
MH0002.12	MH0048.scaffold31758_1	7762	7733	33	30	100	A
MH0002.12	MH0059.scaffold64429_2	957	986	33	30	100	A
MH0002.12	MH0066.scaffold26971_7	1186	1211	33	26	100	N
MH0002.12	MH0085.scaffold37908_5	17632	17603	33	30	100	A
MH0002.12	MH0086.scaffold109528_3	13111	13082	33	30	100	A
MH0002.12	O2.UC-17.C8759298_1	170	199	33	30	100	A
MH0002.12	O2.UC-4.scaffold59307_1	2567	2589	33	23	100	N
MH0002.12	V1.CD-9.scaffold2149_2	1863	1834	33	30	100	A
MH0002.12	V1.UC-10.scaffold87559_3	528	499	33	30	100	A
MH0002.121	MH0059.scaffold98_2	167	201	35	35	94.29	A
MH0002.121	V1.UC-19.scaffold27661_5	3017	3051	35	35	91.43	A
MH0002.125	MH0022.C1734062_1	815	782	34	34	94.12	A
MH0002.127	MH0012.scaffold102708_1	901	868	34	34	100	Y
MH0002.127	MH0037.scaffold21475_1	1151	1118	34	34	100	Y
MH0002.127	MH0058.scaffold108068_2	242	209	34	34	100	Y
MH0002.127	MH0066.scaffold12717_4	8227	8194	34	34	100	Y
MH0002.127	O2.UC-23.scaffold76601_1	147	180	34	34	100	Y
MH0002.127	V1.UC-19.scaffold16581_1	363	330	34	34	100	Y
MH0002.127	V1.UC-7.scaffold47653_1	532	499	34	34	100	Y
MH0002.127	V1.UC-8.scaffold67047_1	1412	1379	34	34	100	Y
MH0002.127	V1.UC-9.scaffold29164_2	507	474	34	34	100	Y
MH0002.128	MH0006.scaffold180787_3	1262	1295	34	34	100	Y
MH0002.128	MH0039.scaffold85760_1	538	571	34	34	100	Y
MH0002.128	MH0046.C3030295_1	293	325	34	33	100	A
MH0002.128	MH0067.scaffold23725_1	941	974	34	34	94.12	A
MH0002.128	MH0083.scaffold34618_2	1302	1270	34	33	100	A
MH0002.128	V1.UC-14.scaffold50018_2	1709	1742	34	34	94.12	A
MH0002.128	V1.UC-21.scaffold6563_11	4001	4034	34	34	94.12	A
MH0002.129	MH0041.scaffold80004_6	1244	1211	34	34	100	Y
MH0002.129	MH0059.scaffold68519_1	15540	15573	34	34	97.06	A
MH0002.129	O2.UC-12.scaffold45929_2	1046	1013	34	34	100	Y
MH0002.130	MH0021.C2025375_1	517	550	34	34	100	Y
MH0002.130	MH0022.C1740648_1	1427	1394	34	34	100	Y
MH0002.131	MH0003.scaffold74095_1	834	802	33	33	96.97	A
MH0002.131	MH0028.scaffold8031_8	4786	4754	33	33	96.97	A
MH0002.131	MH0039.scaffold21727_3	787	762	33	26	100	N
MH0002.131	MH0042.scaffold78635_6	804	836	33	33	96.97	A
MH0002.131	MH0044.scaffold5320_2	6904	6872	33	33	96.97	A
MH0002.131	MH0058.scaffold20440_2	5675	5700	33	26	100	N
MH0002.131	O2.UC-19.scaffold399_2	1328	1296	33	33	96.97	A
MH0002.138	O2.UC-18.scaffold10680_2	4515	4483	33	33	100	Y
MH0002.14	MH0006.scaffold149207_1	367	396	33	30	96.67	A
MH0002.14	MH0019.scaffold13404_7	232	261	33	30	96.67	A
MH0002.14	MH0028.scaffold8031_1	2484	2455	33	30	96.67	A
MH0002.14	MH0039.scaffold21727_1	554	525	33	30	96.67	A
MH0002.14	MH0044.scaffold5320_8	3253	3224	33	30	96.67	A
MH0002.14	MH0058.scaffold19676_1	4287	4258	33	30	96.67	A
MH0002.14	MH0083.scaffold81232_1	936	965	33	30	96.67	A
MH0002.14	O2.UC-19.scaffold7766_1	2017	1988	33	30	96.67	A
MH0002.14	V1.CD-1.scaffold36130_2	150	121	33	30	96.67	A
MH0002.143	MH0041.scaffold20586_6	15443	15412	32	32	96.88	A
MH0002.143	MH0064.scaffold75921_1	589	558	32	32	96.88	A
MH0002.143	V1.CD-15.scaffold43894_1	225	256	32	32	96.88	A
MH0002.147	MH0006.scaffold142561_2	63	88	29	26	100	A
MH0002.151	MH0002.scaffold23855_1	199	229	47	31	96.77	N
MH0002.151	MH0016.scaffold38328_2	5695	5725	47	31	96.77	N
MH0002.151	MH0028.scaffold16301_3	5696	5726	47	31	96.77	N
MH0002.151	MH0032.scaffold54743_3	8873	8903	47	31	96.77	N
MH0002.151	MH0040.scaffold102112_1	4423	4453	47	31	96.77	N
MH0002.151	MH0046.scaffold11728_12	2465	2435	47	31	96.77	N
MH0002.151	MH0050.scaffold59682_1	8377	8347	47	31	96.77	N
MH0002.151	MH0054.scaffold21476_13	18702	18732	47	31	96.77	N
MH0002.151	MH0055.scaffold48213_1	1136	1106	47	31	96.77	N
MH0002.151	MH0058.C4209317_1	1260	1290	47	31	96.77	N
MH0002.151	MH0061.scaffold8078_3	1749	1779	47	31	96.77	N
MH0002.151	MH0064.scaffold11509_5	5694	5724	47	31	96.77	N
MH0002.151	MH0069.scaffold75638_2	2479	2449	47	31	96.77	N
MH0002.151	MH0075.scaffold27183_2	6924	6954	47	31	96.77	N
MH0002.151	MH0081.scaffold97362_1	2715	2685	47	31	96.77	N
MH0002.151	MH0082.scaffold25114_1	2009	1979	47	31	96.77	N
MH0002.151	MH0086.scaffold32390_4	700	670	47	31	96.77	N
MH0002.151	O2.UC-21.scaffold5978_3	2477	2447	47	31	96.77	N
MH0002.151	O2.UC-22.scaffold1175_6	12291	12321	47	31	96.77	N
MH0002.151	V1.CD-12.scaffold1222_1	3283	3253	47	31	96.77	N
MH0002.151	V1.CD-14.scaffold52407_3	2461	2431	47	31	96.77	N
MH0002.151	V1.CD-4.scaffold93114_3	1498	1468	47	31	96.77	N
MH0002.151	V1.CD-9.scaffold74819_2	5673	5703	47	31	93.55	N
MH0002.151	V1.UC-8.scaffold16164_1	3872	3902	47	31	96.77	N
MH0002.152	MH0002.scaffold17977_4	3312	3285	47	28	100	N
MH0002.152	MH0012.scaffold118798_2	17763	17790	47	28	100	N
MH0002.152	MH0019.scaffold49984_1	13179	13206	47	28	100	N
MH0002.152	MH0024.scaffold12231_1	57	84	47	28	100	N
MH0002.152	MH0034.scaffold249_23	706	733	47	28	100	N
MH0002.152	MH0035.scaffold9279_15	3537	3564	47	28	100	N
MH0002.152	MH0040.scaffold104405_2	232	259	47	28	100	N
MH0002.152	MH0041.scaffold5272_4	25876	25903	47	28	100	N
MH0002.152	MH0042.scaffold24254_1	250	277	47	28	100	N
MH0002.152	MH0047.scaffold32437_1	423	450	47	28	100	N
MH0002.152	MH0058.scaffold582_1	11245	11272	47	28	100	N
MH0002.152	MH0059.scaffold92286_1	3210	3237	47	28	100	N
MH0002.152	MH0060.scaffold4999_17	969	996	47	28	100	N
MH0002.152	MH0065.scaffold54188_6	3520	3493	47	28	100	N
MH0002.152	MH0069.scaffold59860_6	11195	11222	47	28	100	N
MH0002.152	MH0075.scaffold23368_1	6302	6275	47	28	100	N
MH0002.152	MH0081.scaffold82808_3	385	358	47	28	100	N
MH0002.152	MH0084.scaffold3027_7	696	723	47	28	100	N
MH0002.152	V1.CD-12.scaffold22675_2	12170	12143	47	28	100	N
MH0002.152	V1.CD-2.C12297002_1	274	301	47	28	100	N
MH0002.152	V1.CD-9.scaffold61891_2	1123	1150	47	28	100	N
MH0002.152	V1.UC-19.scaffold6148_14	25920	25893	47	28	100	N
MH0002.158	MH0012.scaffold25621_1	4449	4415	45	35	100	N
MH0002.158	MH0013.scaffold10161_2	1858	1886	45	29	100	N
MH0002.158	MH0035.scaffold12484_7	940	908	45	33	96.97	N
MH0002.158	MH0050.scaffold39868_2	304	276	45	29	96.55	N
MH0002.159	MH0002.scaffold5141_1	1	23	40	23	100	N
MH0002.159	MH0003.scaffold6590_2	1306	1340	40	35	100	A
MH0002.159	MH0004.C1517852_1	493	527	40	35	100	A
MH0002.159	MH0006.scaffold181156_2	4283	4249	40	35	100	A
MH0002.159	MH0007.C1982358_1	1971	2005	40	35	100	A
MH0002.159	MH0009.scaffold8975_5	901	935	40	35	100	A
MH0002.159	MH0010.C1317972_1	1271	1237	40	35	100	A
MH0002.159	MH0011.scaffold37261_1	1933	1967	40	35	100	A
MH0002.159	MH0012.scaffold19123_7	1213	1247	40	35	100	A
MH0002.159	MH0013.C1630585_1	268	302	40	35	100	A
MH0002.159	MH0014.C4727407_1	80	114	40	35	100	A
MH0002.159	MH0015.C1730302_1	1329	1363	40	35	100	A
MH0002.159	MH0017.C1481202_1	567	533	40	35	100	A
MH0002.159	MH0018.scaffold12479_1	5012	4978	40	35	100	A
MH0002.159	MH0019.C1462240_1	1329	1363	40	35	100	A
MH0002.159	MH0020.scaffold43670_1	5345	5311	40	35	100	A
MH0002.159	MH0023.scaffold17363_3	172	138	40	35	100	A
MH0002.159	MH0024.scaffold11703_3	1185	1151	40	35	100	A
MH0002.159	MH0025.scaffold3753_1	523	557	40	35	100	A
MH0002.159	MH0026.C3317289_1	842	876	40	35	100	A
MH0002.159	MH0027.C1906291_1	43	77	40	35	100	A
MH0002.159	MH0028.scaffold2191_2	1306	1340	40	35	100	A
MH0002.159	MH0030.scaffold18092_2	439	473	40	35	97.14	A
MH0002.159	MH0031.scaffold6502_2	190	224	40	35	100	A
MH0002.159	MH0032.scaffold5465_1	3321	3287	40	35	100	A
MH0002.159	MH0033.scaffold1420_2	142	108	40	35	100	A
MH0002.159	MH0034.scaffold21334_3	863	829	40	35	100	A
MH0002.159	MH0035.scaffold70160_2	247	281	40	35	100	A
MH0002.159	MH0036.scaffold20711_7	503	469	40	35	100	A
MH0002.159	MH0037.scaffold63769_1	18340	18374	40	35	100	A
MH0002.159	MH0038.scaffold533_1	883	849	40	35	100	A
MH0002.159	MH0040.scaffold11576_11	2611	2645	40	35	100	A
MH0002.159	MH0042.scaffold15103_4	1318	1352	40	35	100	A
MH0002.159	MH0044.scaffold5107_4	520	486	40	35	100	A
MH0002.159	MH0045.scaffold5111_2	1910	1944	40	35	100	A
MH0002.159	MH0046.scaffold1836_7	607	573	40	35	100	A
MH0002.159	MH0049.scaffold1044_1	5815	5849	40	35	100	A
MH0002.159	MH0050.scaffold63339_1	1761	1727	40	35	100	A
MH0002.159	MH0051.C2128815_1	642	608	40	35	100	A
MH0002.159	MH0052.scaffold15598_1	1933	1967	40	35	100	A
MH0002.159	MH0055.scaffold4914_3	1910	1944	40	35	100	A
MH0002.159	MH0056.scaffold39174_1	461	495	40	35	100	A
MH0002.159	MH0057.scaffold6601_1	924	958	40	35	100	A
MH0002.159	MH0060.scaffold30348_2	1686	1652	40	35	100	A
MH0002.159	MH0062.scaffold47367_2	2085	2119	40	35	100	A
MH0002.159	MH0063.scaffold12942_1	4963	4929	40	35	100	A
MH0002.159	MH0064.scaffold7841_1	1329	1363	40	35	100	A
MH0002.159	MH0065.scaffold22843_2	224	190	40	35	100	A
MH0002.159	MH0066.scaffold16567_1	1369	1335	40	35	100	A
MH0002.159	MH0067.scaffold6196_3	901	935	40	35	100	A
MH0002.159	MH0069.scaffold29457_1	1834	1868	40	35	100	A
MH0002.159	MH0070.scaffold663_2	85	51	40	35	100	A
MH0002.159	MH0071.scaffold7093_2	901	935	40	35	100	A
MH0002.159	MH0074.scaffold1574_1	2311	2345	40	35	100	A
MH0002.159	MH0075.scaffold22414_2	1811	1845	40	35	100	A
MH0002.159	MH0076.scaffold5495_1	1347	1381	40	35	100	A
MH0002.159	MH0077.scaffold34472_2	901	935	40	35	100	A
MH0002.159	MH0078.scaffold34551_2	100	134	40	35	100	A
MH0002.159	MH0079.scaffold31456_1	1933	1967	40	35	100	A
MH0002.159	MH0080.C3278446_1	179	213	40	35	100	A
MH0002.159	MH0082.scaffold19876_1	366	400	40	35	100	A
MH0002.159	MH0083.scaffold1899_1	400	366	40	35	100	A
MH0002.159	MH0084.scaffold3303_4	322	288	40	35	100	A
MH0002.159	MH0086.scaffold40961_4	1700	1734	40	35	100	A
MH0002.159	O2.UC-11.C4465944_1	609	575	40	35	100	A
MH0002.159	O2.UC-12.scaffold3743_2	4970	4936	40	35	100	A
MH0002.159	O2.UC-13.scaffold16597_3	1306	1340	40	35	100	A
MH0002.159	O2.UC-14.scaffold723_6	1251	1285	40	35	100	A
MH0002.159	O2.UC-17.scaffold664_2	1284	1318	40	35	100	A
MH0002.159	O2.UC-20.scaffold19739_1	163	197	40	35	100	A
MH0002.159	O2.UC-23.scaffold8222_2	853	887	40	35	100	A
MH0002.159	O2.UC-24.scaffold321_1	7884	7918	40	35	100	A
MH0002.159	O2.UC-4.scaffold1979_3	496	530	40	35	100	A
MH0002.159	V1.CD-13.scaffold101005_1	5017	4983	40	35	100	A
MH0002.159	V1.CD-15.scaffold952_1	1216	1182	40	35	100	A
MH0002.159	V1.CD-2.scaffold18096_2	76	110	40	35	100	A
MH0002.159	V1.CD-4.scaffold7656_4	262	228	40	35	100	A
MH0002.159	V1.CD-6.scaffold11770_2	1464	1498	40	35	100	A
MH0002.159	V1.CD-8.scaffold9988_1	924	958	40	35	100	A
MH0002.159	V1.UC-10.scaffold74331_1	729	763	40	35	100	A
MH0002.159	V1.UC-13.scaffold6341_1	924	958	40	35	100	A
MH0002.159	V1.UC-15.scaffold566_10	24324	24358	40	35	100	A
MH0002.159	V1.UC-18.scaffold35915_1	1271	1305	40	35	100	A
MH0002.159	V1.UC-19.scaffold9058_2	2120	2154	40	35	100	A
MH0002.159	V1.UC-21.scaffold8942_3	3358	3392	40	35	100	A
MH0002.159	V1.UC-6.scaffold2239_1	800	766	40	35	100	A
MH0002.159	V1.UC-7.scaffold3692_2	334	368	40	35	100	A
MH0002.159	V1.UC-8.scaffold2925_1	1869	1903	40	35	100	A
MH0002.159	V1.UC-9.scaffold8604_1	4710	4744	40	35	100	A
MH0002.161	MH0043.scaffold79916_4	1908	1874	40	35	100	A
MH0002.161	MH0044.C3631638_1	1550	1516	40	35	100	A
MH0002.161	V1.CD-15.scaffold20141_3	499	468	40	32	100	N
MH0002.161	V1.UC-10.scaffold89658_1	1074	1108	40	35	100	A
MH0002.162	MH0003.scaffold23146_1	1149	1116	39	34	100	A
MH0002.162	MH0007.scaffold42224_10	1797	1830	39	34	100	A
MH0002.162	MH0008.C1729266_1	10905	10872	39	34	100	A
MH0002.162	MH0009.scaffold15187_8	409	442	39	34	100	A
MH0002.162	MH0010.C1326460_1	8734	8767	39	34	97.06	A
MH0002.162	MH0011.scaffold56198_1	12452	12485	39	34	94.12	A
MH0002.162	MH0012.scaffold6718_1	17569	17602	39	34	94.12	A
MH0002.162	MH0013.scaffold51060_1	97	130	39	34	100	A
MH0002.162	MH0014.scaffold56255_1	11684	11717	39	34	100	A
MH0002.162	MH0016.scaffold6802_2	279	246	39	34	100	A
MH0002.162	MH0017.C1493383_1	2068	2035	39	34	94.12	A
MH0002.162	MH0018.scaffold3412_2	10026	10059	39	34	94.12	A
MH0002.162	MH0019.C1466180_1	2146	2179	39	34	97.06	A
MH0002.162	MH0021.C2075527_1	1335	1302	39	34	100	A
MH0002.162	MH0025.scaffold104774_1	42	15	39	28	96.43	N
MH0002.162	MH0026.scaffold9864_9	15669	15636	39	34	100	A
MH0002.162	MH0033.scaffold113533_1	2148	2181	39	34	97.06	A
MH0002.162	MH0037.scaffold15106_1	6993	6960	39	34	97.06	A
MH0002.162	MH0038.scaffold56008_2	15514	15481	39	34	94.12	A
MH0002.162	MH0039.scaffold13945_1	651	618	39	34	94.12	A
MH0002.162	MH0040.scaffold83103_1	16965	16998	39	34	94.12	A
MH0002.162	MH0047.scaffold42677_1	355	322	39	34	97.06	A
MH0002.162	MH0049.scaffold32409_1	8737	8770	39	34	100	A
MH0002.162	MH0051.scaffold51308_2	15605	15572	39	34	94.12	A
MH0002.162	MH0052.scaffold62597_3	146	179	39	34	94.12	A
MH0002.162	MH0056.scaffold36103_2	967	934	39	34	97.06	A
MH0002.162	MH0059.scaffold19783_2	484	451	39	34	100	A
MH0002.162	MH0060.scaffold108941_2	463	496	39	34	97.06	A
MH0002.162	MH0062.C5437214_1	1990	1957	39	34	94.12	A
MH0002.162	MH0064.scaffold1878_2	27039	27072	39	34	94.12	A
MH0002.162	MH0065.scaffold79214_2	5541	5508	39	34	97.06	A
MH0002.162	MH0067.scaffold10212_7	14020	13987	39	34	94.12	A
MH0002.162	MH0069.scaffold9633_2	733	766	39	34	100	A
MH0002.162	MH0070.scaffold107537_2	31	64	39	34	94.12	A
MH0002.162	MH0071.scaffold38862_1	12452	12485	39	34	94.12	A
MH0002.162	MH0073.C3687469_1	222	255	39	34	94.12	A
MH0002.162	MH0076.scaffold72604_1	2708	2741	39	34	100	A
MH0002.162	MH0077.C4575175_1	6532	6565	39	34	94.12	A
MH0002.162	MH0079.scaffold16345_2	494	461	39	34	94.12	A
MH0002.162	MH0080.scaffold95907_1	225	192	39	34	100	A
MH0002.162	MH0082.scaffold27962_1	1554	1521	39	34	94.12	A
MH0002.162	MH0083.scaffold7211_4	20606	20639	39	34	94.12	A
MH0002.162	MH0084.scaffold15156_2	670	637	39	34	100	A
MH0002.162	MH0086.scaffold8377_1	20634	20667	39	34	94.12	A
MH0002.162	O2.UC-11.C4420668_1	398	365	39	34	100	A
MH0002.162	O2.UC-13.scaffold802_1	990	957	39	34	100	A
MH0002.162	O2.UC-14.scaffold14852_1	298	265	39	34	94.12	A
MH0002.162	O2.UC-17.scaffold702_4	7765	7732	39	34	100	A
MH0002.162	O2.UC-23.scaffold9864_7	767	734	39	34	100	A
MH0002.162	O2.UC-4.scaffold36196_1	3053	3020	39	34	94.12	A
MH0002.162	V1.CD-11.scaffold35042_1	54	87	39	34	94.12	A
MH0002.162	V1.CD-13.scaffold481_2	5191	5224	39	34	94.12	A
MH0002.162	V1.CD-3.scaffold46559_2	31	64	39	34	94.12	A
MH0002.162	V1.CD-4.scaffold95401_1	1990	1957	39	34	94.12	A
MH0002.162	V1.CD-8.scaffold119236_1	1407	1374	39	34	100	A
MH0002.162	V1.CD-9.scaffold2225_4	169	202	39	34	97.06	A
MH0002.162	V1.UC-13.scaffold67317_1	1686	1653	39	34	100	A
MH0002.162	V1.UC-18.scaffold1503_1	12870	12903	39	34	97.06	A
MH0002.162	V1.UC-19.scaffold157_2	2204	2171	39	34	94.12	A
MH0002.162	V1.UC-7.scaffold40804_2	4019	3986	39	34	97.06	A
MH0002.162	V1.UC-8.scaffold30819_1	7404	7371	39	34	94.12	A
MH0002.162	V1.UC-9.scaffold34064_1	7560	7527	39	34	100	A
MH0002.163	MH0012.scaffold2352_4	16496	16529	39	34	100	A
MH0002.163	MH0054.scaffold54283_2	4754	4724	39	31	100	N
MH0002.163	V1.CD-14.scaffold100994_3	1904	1934	39	31	100	N
MH0002.163	V1.UC-6.scaffold105903_1	11354	11387	39	34	100	A
MH0002.163	V1.UC-8.scaffold96492_1	7069	7039	39	31	100	N
MH0002.164	MH0013.scaffold3258_2	4169	4190	39	22	100	N
MH0002.165	MH0064.scaffold50124_3	955	987	38	33	96.97	A
MH0002.165	O2.UC-13.scaffold29632_4	577	609	38	33	100	A
MH0002.165	V1.CD-4.scaffold83367_1	258	226	38	33	100	A
MH0002.166	MH0006.scaffold317379_2	2180	2202	38	23	100	N
MH0002.167	O2.UC-13.scaffold51468_7	316	284	38	33	96.97	A
MH0002.167	V1.UC-19.scaffold12251_2	385	353	38	33	96.97	A
MH0002.167	unmapped_K23_L70.scaffold570132_1	138	170	38	33	96.97	A
MH0002.168	V1.UC-19.scaffold23278_1	5717	5753	38	37	94.59	A
MH0002.168	V1.UC-9.scaffold20022_11	32	67	38	36	94.44	A
MH0002.168	unmapped_K23_L70.scaffold348112_1	22	57	38	36	94.44	A
MH0002.169	MH0006.scaffold180787_3	1294	1262	38	33	100	A
MH0002.169	MH0039.scaffold85760_1	570	538	38	33	100	A
MH0002.169	MH0046.C3030295_1	325	293	38	33	100	A
MH0002.169	MH0067.scaffold23725_1	973	941	38	33	93.94	A
MH0002.169	MH0083.scaffold34618_2	1270	1302	38	33	100	A
MH0002.169	V1.UC-14.scaffold50018_2	1741	1709	38	33	93.94	A
MH0002.169	V1.UC-21.scaffold6563_11	4033	4001	38	33	93.94	A
MH0002.17	MH0002.scaffold53653_1	7721	7756	41	36	100	A
MH0002.17	MH0006.scaffold320159_1	5135	5170	41	36	100	A
MH0002.17	MH0009.scaffold98535_1	227	192	41	36	100	A
MH0002.17	MH0017.C1491921_1	2709	2674	41	36	100	A
MH0002.17	MH0018.scaffold21268_1	5910	5945	41	36	100	A
MH0002.17	MH0026.scaffold9132_2	17059	17094	41	36	100	A
MH0002.17	MH0028.scaffold20468_3	65	100	41	36	100	A
MH0002.17	MH0032.scaffold25153_4	2785	2820	41	36	100	A
MH0002.17	MH0035.scaffold10027_1	227	192	41	36	100	A
MH0002.17	MH0038.scaffold84624_1	887	852	41	36	100	A
MH0002.17	MH0039.scaffold12501_1	4692	4727	41	36	100	A
MH0002.17	MH0057.scaffold8642_3	204	169	41	36	100	A
MH0002.17	MH0059.scaffold89002_1	2012	1977	41	36	100	A
MH0002.17	MH0060.scaffold80253_3	828	863	41	36	100	A
MH0002.17	MH0071.scaffold1136_3	44067	44102	41	36	100	A
MH0002.17	MH0076.scaffold54646_2	646	611	41	36	100	A
MH0002.17	MH0080.C3308418_1	152	187	41	36	100	A
MH0002.17	O2.UC-13.scaffold6048_1	227	192	41	36	100	A
MH0002.17	O2.UC-17.scaffold4195_3	6546	6581	41	36	100	A
MH0002.17	O2.UC-19.C3616397_1	462	497	41	36	100	A
MH0002.17	O2.UC-20.scaffold85878_1	5136	5171	41	36	100	A
MH0002.17	O2.UC-22.scaffold77951_1	2053	2018	41	36	100	A
MH0002.17	V1.CD-1.scaffold15492_2	575	540	41	36	100	A
MH0002.17	V1.CD-11.scaffold70248_1	227	192	41	36	100	A
MH0002.17	V1.CD-13.scaffold16276_3	117	82	41	36	100	A
MH0002.17	V1.CD-14.C4159046_1	227	192	41	36	100	A
MH0002.17	V1.CD-15.C3338461_1	89	124	41	36	100	A
MH0002.17	V1.CD-6.scaffold62720_2	5289	5324	41	36	100	A
MH0002.17	V1.CD-8.scaffold118709_1	5116	5151	41	36	100	A
MH0002.17	V1.CD-9.scaffold16072_1	998	963	41	36	100	A
MH0002.17	V1.UC-13.scaffold69766_2	426	461	41	36	100	A
MH0002.17	V1.UC-19.scaffold47540_1	227	192	41	36	100	A
MH0002.17	V1.UC-6.scaffold106564_2	373	408	41	36	100	A
MH0002.17	V1.UC-7.scaffold38627_1	5753	5788	41	36	100	A
MH0002.17	V1.UC-8.scaffold18948_1	884	849	41	36	100	A
MH0002.17	V1.UC-9.scaffold16181_1	6673	6638	41	36	100	A
MH0002.176	MH0064.scaffold76723_1	425	398	37	28	96.43	N
MH0002.176	MH0070.scaffold41858_1	5722	5749	37	28	96.43	N
MH0002.176	MH0083.scaffold59817_1	25930	25903	37	28	96.43	N
MH0002.176	O2.UC-13.scaffold51468_7	432	463	37	32	100	A
MH0002.176	V1.UC-10.C6625465_1	239	212	37	28	96.43	N
MH0002.176	V1.UC-19.scaffold12251_2	501	528	37	28	96.43	N
MH0002.178	MH0002.scaffold1973_1	980	1014	37	35	100	A
MH0002.178	MH0006.scaffold301445_1	586	620	37	35	97.14	A
MH0002.178	MH0012.scaffold17579_2	308	274	37	35	91.43	A
MH0002.178	MH0021.scaffold65062_1	687	653	37	35	91.43	A
MH0002.178	MH0024.scaffold28436_4	544	510	37	35	100	A
MH0002.178	MH0031.scaffold7856_2	1536	1502	37	35	91.43	A
MH0002.178	MH0032.scaffold13211_3	570	536	37	35	91.43	A
MH0002.178	MH0034.scaffold3827_8	3893	3859	37	35	91.43	A
MH0002.178	MH0036.scaffold67524_2	330	363	37	34	97.06	A
MH0002.178	MH0040.C3957712_1	952	986	37	35	91.43	A
MH0002.178	MH0043.scaffold44241_4	2565	2531	37	35	91.43	A
MH0002.178	MH0044.scaffold29581_1	748	714	37	35	97.14	A
MH0002.178	MH0053.scaffold5460_19	206	172	37	35	91.43	A
MH0002.178	MH0054.scaffold61358_1	902	936	37	35	91.43	A
MH0002.178	MH0055.scaffold22108_1	1194	1228	37	35	100	A
MH0002.178	MH0063.scaffold17733_2	3163	3197	37	35	91.43	A
MH0002.178	MH0069.scaffold84580_1	296	330	37	35	100	A
MH0002.178	MH0070.scaffold12760_8	868	902	37	35	91.43	A
MH0002.178	MH0073.scaffold28518_2	856	890	37	35	91.43	A
MH0002.178	MH0077.scaffold1017_2	633	599	37	35	100	A
MH0002.178	MH0081.scaffold296_2	851	885	37	35	100	A
MH0002.178	MH0085.scaffold165_2	327	293	37	35	91.43	A
MH0002.178	V1.CD-9.scaffold44389_3	805	832	37	28	100	N
MH0002.178	V1.UC-9.scaffold7088_6	1966	1999	37	34	94.12	A
MH0002.179	MH0011.scaffold12103_1	1336	1372	37	37	100	Y
MH0002.179	MH0042.scaffold117426_1	360	328	37	33	100	A
MH0002.179	MH0043.scaffold105452_1	1319	1351	37	33	100	A
MH0002.179	MH0051.C2061136_1	417	381	37	37	100	Y
MH0002.179	MH0060.scaffold87912_1	403	439	37	37	100	Y
MH0002.179	MH0068.scaffold28095_1	6553	6517	37	37	100	Y
MH0002.179	MH0071.scaffold29093_1	137	101	37	37	100	Y
MH0002.179	MH0083.scaffold8242_1	231	267	37	37	100	Y
MH0002.179	O2.UC-22.scaffold41266_1	3682	3646	37	37	100	Y
MH0002.179	V1.UC-14.scaffold4470_1	2892	2927	37	36	100	A
MH0002.179	V1.UC-19.scaffold85124_2	3382	3346	37	37	100	Y
MH0002.179	V1.UC-21.scaffold7438_4	75	110	37	36	100	A
MH0002.179	V1.UC-6.scaffold66149_1	399	431	37	33	100	A
MH0002.180	MH0003.scaffold74095_1	803	834	37	32	96.88	A
MH0002.180	MH0028.scaffold8031_8	4755	4786	37	32	96.88	A
MH0002.180	MH0039.scaffold21727_3	763	787	37	25	100	N
MH0002.180	MH0042.scaffold78635_6	835	804	37	32	96.88	A
MH0002.180	MH0044.scaffold5320_2	6873	6904	37	32	96.88	A
MH0002.180	MH0058.scaffold20440_2	5699	5675	37	25	100	N
MH0002.180	O2.UC-19.scaffold399_2	1297	1328	37	32	96.88	A
MH0002.182	MH0002.scaffold33362_2	2052	2018	37	35	100	A
MH0002.182	MH0004.scaffold46207_3	774	740	37	35	100	A
MH0002.182	MH0006.scaffold70143_1	1745	1779	37	35	100	A
MH0002.182	MH0009.scaffold2785_1	2348	2314	37	35	100	A
MH0002.182	MH0012.scaffold23075_2	1265	1299	37	35	100	A
MH0002.182	MH0014.scaffold21166_4	536	502	37	35	100	A
MH0002.182	MH0021.scaffold70074_1	1593	1559	37	35	100	A
MH0002.182	MH0022.scaffold10164_4	802	768	37	35	100	A
MH0002.182	MH0025.scaffold24070_1	704	670	37	35	100	A
MH0002.182	MH0028.scaffold36968_2	491	457	37	35	94.29	A
MH0002.182	MH0030.scaffold11738_1	1693	1662	37	32	100	A
MH0002.182	MH0031.scaffold11240_4	1038	1072	37	35	100	A
MH0002.182	MH0032.scaffold9610_2	2323	2289	37	35	100	A
MH0002.182	MH0033.scaffold12676_7	193	227	37	35	100	A
MH0002.182	MH0034.scaffold3827_12	541	575	37	35	97.14	A
MH0002.182	MH0036.scaffold19623_5	710	744	37	35	100	A
MH0002.182	MH0037.scaffold617_3	999	965	37	35	97.14	A
MH0002.182	MH0038.scaffold41380_11	801	767	37	35	97.14	A
MH0002.182	MH0040.scaffold83744_1	641	675	37	35	100	A
MH0002.182	MH0041.scaffold9672_8	1395	1361	37	35	100	A
MH0002.182	MH0042.scaffold111021_4	141	175	37	35	100	A
MH0002.182	MH0043.scaffold89714_10	2027	1993	37	35	100	A
MH0002.182	MH0044.scaffold3087_2	541	575	37	35	100	A
MH0002.182	MH0046.C3090801_1	568	602	37	35	100	A
MH0002.182	MH0048.scaffold7942_1	479	445	37	35	97.14	A
MH0002.182	MH0049.C2335803_1	69	103	37	35	97.14	A
MH0002.182	MH0050.scaffold5063_2	7469	7503	37	35	100	A
MH0002.182	MH0051.scaffold10756_1	1796	1762	37	35	100	A
MH0002.182	MH0053.scaffold413_11	269	235	37	35	100	A
MH0002.182	MH0054.scaffold1777_4	710	744	37	35	100	A
MH0002.182	MH0055.scaffold1715_9	1650	1616	37	35	100	A
MH0002.182	MH0056.scaffold7277_7	1950	1984	37	35	100	A
MH0002.182	MH0059.scaffold10548_2	797	831	37	35	100	A
MH0002.182	MH0060.scaffold30305_4	1191	1225	37	35	100	A
MH0002.182	MH0063.scaffold21408_2	2650	2616	37	35	97.14	A
MH0002.182	MH0065.scaffold80096_2	1023	988	37	36	100	A
MH0002.182	MH0069.C6855667_1	386	352	37	35	100	A
MH0002.182	MH0070.scaffold101435_5	319	285	37	35	100	A
MH0002.182	MH0072.scaffold8612_2	3446	3412	37	35	100	A
MH0002.182	MH0074.scaffold34021_2	710	744	37	35	100	A
MH0002.182	MH0074.scaffold898_3	1859	1893	37	35	94.29	A
MH0002.182	MH0076.scaffold73337_1	564	598	37	35	100	A
MH0002.182	MH0077.scaffold8415_7	3024	2990	37	35	100	A
MH0002.182	MH0081.scaffold60053_1	2557	2591	37	35	97.14	A
MH0002.182	MH0082.scaffold3041_1	1463	1497	37	35	100	A
MH0002.182	MH0083.scaffold1776_3	1395	1361	37	35	100	A
MH0002.182	MH0085.scaffold2727_10	422	456	37	35	100	A
MH0002.182	MH0086.scaffold10615_5	5171	5205	37	35	100	A
MH0002.182	O2.UC-12.scaffold57315_1	1785	1751	37	35	100	A
MH0002.182	O2.UC-18.scaffold11751_2	593	559	37	35	94.29	A
MH0002.182	O2.UC-24.scaffold3577_2	698	732	37	35	100	A
MH0002.182	V1.UC-18.scaffold14183_2	1284	1250	37	35	100	A
MH0002.182	V1.UC-19.scaffold3240_4	191	225	37	35	100	A
MH0002.182	V1.UC-8.scaffold57310_3	2683	2717	37	35	100	A
MH0002.182	V1.UC-9.scaffold7088_5	580	546	37	35	94.29	A
MH0002.183	MH0016.scaffold33786_11	13636	13665	37	30	100	N
MH0002.183	V1.CD-6.scaffold22859_2	135	106	37	30	100	N
MH0002.192	MH0012.scaffold35889_1	1537	1571	36	35	94.29	A
MH0002.192	MH0025.scaffold3759_2	1634	1600	36	35	94.29	A
MH0002.192	MH0035.scaffold5604_3	1735	1769	36	35	100	A
MH0002.192	MH0055.scaffold71507_1	2123	2157	36	35	97.14	A
MH0002.192	MH0062.scaffold78955_1	734	700	36	35	100	A
MH0002.192	MH0065.scaffold347_1	4632	4598	36	35	100	A
MH0002.192	MH0081.scaffold29892_2	207	173	36	35	100	A
MH0002.192	V1.UC-6.scaffold97171_1	170	136	36	35	100	A
MH0002.193	MH0002.scaffold11945_3	4809	4776	36	34	100	A
MH0002.193	MH0003.scaffold59862_1	1023	990	36	34	100	A
MH0002.193	MH0006.C14455077_1	213	180	36	34	100	A
MH0002.193	MH0012.scaffold25416_1	808	841	36	34	100	A
MH0002.193	MH0013.scaffold39057_6	312	345	36	34	100	A
MH0002.193	MH0020.scaffold11889_6	414	381	36	34	100	A
MH0002.193	MH0025.scaffold3759_1	2244	2267	36	24	100	N
MH0002.193	MH0030.scaffold62699_2	335	302	36	34	100	A
MH0002.193	MH0031.scaffold38085_1	1489	1518	36	30	100	N
MH0002.193	MH0033.scaffold104730_2	569	602	36	34	100	A
MH0002.193	MH0035.scaffold5604_4	434	401	36	34	97.06	A
MH0002.193	MH0036.scaffold3368_16	849	882	36	34	94.12	A
MH0002.193	MH0037.scaffold10798_9	749	716	36	34	100	A
MH0002.193	MH0039.scaffold22804_13	556	589	36	34	100	A
MH0002.193	MH0042.scaffold97520_3	504	537	36	34	100	A
MH0002.193	MH0043.scaffold33133_9	2132	2165	36	34	100	A
MH0002.193	MH0053.scaffold29287_7	439	406	36	34	100	A
MH0002.193	MH0055.scaffold2625_16	99	132	36	34	100	A
MH0002.193	MH0058.scaffold38527_1	691	724	36	34	100	A
MH0002.193	MH0059.C3361189_1	496	463	36	34	100	A
MH0002.193	MH0063.scaffold13667_3	439	406	36	34	100	A
MH0002.193	MH0065.scaffold347_1	2852	2885	36	34	100	A
MH0002.193	MH0066.C3406935_1	555	522	36	34	100	A
MH0002.193	MH0070.scaffold4825_3	960	931	36	30	100	N
MH0002.193	MH0080.C3309226_1	1232	1265	36	34	100	A
MH0002.193	MH0081.C3690229_1	512	479	36	34	100	A
MH0002.193	MH0083.scaffold10421_7	1823	1856	36	34	97.06	A
MH0002.193	O2.UC-1.scaffold24125_2	304	271	36	34	100	A
MH0002.193	V1.UC-14.scaffold57424_2	650	683	36	34	100	A
MH0002.193	V1.UC-17.scaffold40282_6	242	275	36	34	97.06	A
MH0002.193	V1.UC-18.scaffold43694_3	309	342	36	34	100	A
MH0002.193	V1.UC-6.scaffold7020_1	594	561	36	34	97.06	A
MH0002.198	V1.CD-13.scaffold17758_11	670	640	36	31	96.77	A
MH0002.201	MH0015.scaffold62343_2	5374	5339	36	36	100	Y
MH0002.201	MH0036.scaffold10533_10	3173	3208	36	36	91.67	A
MH0002.201	MH0055.scaffold351_6	313	278	36	36	100	Y
MH0002.201	MH0060.scaffold39947_3	6822	6787	36	36	100	Y
MH0002.201	MH0083.scaffold41253_1	4481	4516	36	36	100	Y
MH0002.201	O2.UC-22.scaffold31707_1	486	521	36	36	91.67	A
MH0002.201	V1.UC-6.scaffold26558_1	313	278	36	36	100	Y
MH0002.203	MH0003.scaffold46003_1	357	324	35	34	100	A
MH0002.203	MH0009.scaffold21435_1	2496	2463	35	34	100	A
MH0002.203	MH0011.scaffold21116_1	313	346	35	34	100	A
MH0002.203	MH0012.scaffold18451_2	2714	2681	35	34	100	A
MH0002.203	MH0017.C1491689_1	51	18	35	34	100	A
MH0002.203	MH0018.scaffold2283_10	5731	5698	35	34	100	A
MH0002.203	MH0019.C1412516_1	414	447	35	34	100	A
MH0002.203	MH0021.scaffold70236_1	398	431	35	34	100	A
MH0002.203	MH0025.scaffold1217_2	390	356	35	35	91.43	A
MH0002.203	MH0025.scaffold51120_1	358	325	35	34	100	A
MH0002.203	MH0026.scaffold779_5	1885	1852	35	34	100	A
MH0002.203	MH0028.scaffold5968_1	491	524	35	34	100	A
MH0002.203	MH0032.scaffold17021_3	572	605	35	34	100	A
MH0002.203	MH0033.scaffold66298_1	1622	1655	35	34	100	A
MH0002.203	MH0034.scaffold1854_24	732	765	35	34	100	A
MH0002.203	MH0036.scaffold48530_1	197	230	35	34	100	A
MH0002.203	MH0037.scaffold471_4	10055	10088	35	34	100	A
MH0002.203	MH0038.scaffold33364_3	3189	3156	35	34	100	A
MH0002.203	MH0039.scaffold21153_1	2787	2820	35	34	100	A
MH0002.203	MH0040.scaffold5009_1	1703	1736	35	34	100	A
MH0002.203	MH0041.scaffold49551_1	203	236	35	34	100	A
MH0002.203	MH0042.scaffold7138_2	165	132	35	34	100	A
MH0002.203	MH0046.scaffold5202_2	216	249	35	34	100	A
MH0002.203	MH0048.scaffold44807_1	359	392	35	34	100	A
MH0002.203	MH0049.scaffold198_3	5733	5700	35	34	100	A
MH0002.203	MH0050.scaffold3629_1	1061	1094	35	34	100	A
MH0002.203	MH0051.scaffold217_3	15239	15272	35	34	100	A
MH0002.203	MH0055.scaffold10901_2	165	132	35	34	100	A
MH0002.203	MH0060.scaffold86624_1	1473	1440	35	34	100	A
MH0002.203	MH0063.scaffold630_1	1209	1243	35	35	91.43	A
MH0002.203	MH0064.scaffold3438_3	1173	1206	35	34	100	A
MH0002.203	MH0065.scaffold18883_5	10042	10075	35	34	100	A
MH0002.203	MH0067.scaffold7677_2	1685	1718	35	34	100	A
MH0002.203	MH0068.scaffold45296_1	795	828	35	34	100	A
MH0002.203	MH0069.scaffold7884_2	3040	3007	35	34	100	A
MH0002.203	MH0070.scaffold14329_4	334	301	35	34	100	A
MH0002.203	MH0071.scaffold24_3	10053	10086	35	34	100	A
MH0002.203	MH0075.scaffold11871_1	595	628	35	34	100	A
MH0002.203	MH0081.scaffold45135_1	491	524	35	34	100	A
MH0002.203	MH0082.scaffold91206_1	398	431	35	34	100	A
MH0002.203	MH0083.scaffold51135_2	335	302	35	34	100	A
MH0002.203	MH0084.scaffold8351_5	219	252	35	34	91.18	A
MH0002.203	MH0085.scaffold7708_2	3141	3108	35	34	100	A
MH0002.203	MH0086.scaffold986_4	174	207	35	34	100	A
MH0002.203	O2.UC-1.scaffold55736_2	57	90	35	34	100	A
MH0002.203	O2.UC-11.scaffold11294_1	1	34	35	34	100	A
MH0002.203	O2.UC-13.scaffold14436_1	496	529	35	34	100	A
MH0002.203	O2.UC-14.scaffold4822_2	335	302	35	34	100	A
MH0002.203	O2.UC-17.scaffold628_1	65	98	35	34	100	A
MH0002.203	O2.UC-19.scaffold8256_3	80	47	35	34	100	A
MH0002.203	O2.UC-23.scaffold70596_1	915	948	35	34	100	A
MH0002.203	O2.UC-4.scaffold811_1	3051	3018	35	34	100	A
MH0002.203	V1.CD-13.scaffold46917_1	477	444	35	34	100	A
MH0002.203	V1.CD-3.scaffold3948_1	595	628	35	34	100	A
MH0002.203	V1.CD-4.scaffold12553_4	797	764	35	34	100	A
MH0002.203	V1.CD-8.scaffold13567_2	794	827	35	34	100	A
MH0002.203	V1.CD-9.scaffold83_1	2303	2270	35	34	100	A
MH0002.203	V1.UC-10.scaffold69170_1	1135	1168	35	34	100	A
MH0002.203	V1.UC-13.scaffold10696_1	599	632	35	34	91.18	A
MH0002.203	V1.UC-13.scaffold47747_1	262	229	35	34	100	A
MH0002.203	V1.UC-14.scaffold3961_2	468	501	35	34	100	A
MH0002.203	V1.UC-17.scaffold4461_3	3273	3306	35	34	100	A
MH0002.203	V1.UC-18.scaffold19852_3	3141	3108	35	34	100	A
MH0002.203	V1.UC-18.scaffold4791_8	2326	2293	35	34	91.18	A
MH0002.203	V1.UC-21.scaffold10076_7	572	605	35	34	100	A
MH0002.203	V1.UC-6.scaffold5134_1	188	155	35	34	100	A
MH0002.203	V1.UC-8.scaffold19570_1	1901	1934	35	34	100	A
MH0002.203	V1.UC-9.scaffold12070_3	2336	2369	35	34	100	A
MH0002.204	MH0012.scaffold4664_11	1675	1642	35	34	100	A
MH0002.204	MH0041.scaffold20586_2	1043	1076	35	34	97.06	A
MH0002.204	MH0042.scaffold36533_2	44	11	35	34	97.06	A
MH0002.204	MH0066.scaffold23609_2	97	64	35	34	100	A
MH0002.204	O2.UC-21.scaffold58232_1	575	608	35	34	97.06	A
MH0002.204	V1.CD-4.scaffold78164_2	249	217	35	33	100	A
MH0002.204	V1.UC-18.scaffold11932_16	153	120	35	34	97.06	A
MH0002.204	V1.UC-19.scaffold83244_2	243	210	35	34	100	A
MH0002.204	unmapped_K23_L70.scaffold99179_1	226	193	35	34	97.06	A
MH0002.205	MH0025.scaffold88547_1	1603	1636	35	34	100	A
MH0002.205	MH0041.scaffold80004_6	6907	6874	35	34	100	A
MH0002.205	MH0042.scaffold31955_5	553	520	35	34	100	A
MH0002.205	MH0043.scaffold42498_1	2849	2882	35	34	100	A
MH0002.205	MH0059.scaffold68519_1	9970	10003	35	34	100	A
MH0002.205	MH0077.scaffold34506_3	342	309	35	34	97.06	A
MH0002.205	MH0081.scaffold10601_3	8320	8287	35	34	97.06	A
MH0002.205	O2.UC-12.scaffold41823_5	520	553	35	34	100	A
MH0002.205	V1.CD-8.scaffold37174_1	17204	17171	35	34	97.06	A
MH0002.207	MH0002.scaffold36103_3	221	253	35	33	100	A
MH0002.207	MH0004.scaffold7243_2	31	1	35	31	100	A
MH0002.207	MH0006.scaffold77618_2	373	341	35	33	100	A
MH0002.207	MH0009.scaffold5402_2	310	278	35	33	100	A
MH0002.207	MH0012.scaffold94631_1	527	495	35	33	100	A
MH0002.207	MH0014.C4787554_1	412	444	35	33	100	A
MH0002.207	MH0016.scaffold13185_3	248	280	35	33	100	A
MH0002.207	MH0017.scaffold12648_3	281	249	35	33	100	A
MH0002.207	MH0021.C2064693_1	1032	1000	35	33	100	A
MH0002.207	MH0030.scaffold3841_2	1591	1623	35	33	100	A
MH0002.207	MH0031.scaffold15768_5	106	74	35	33	100	A
MH0002.207	MH0032.scaffold24563_2	539	507	35	33	100	A
MH0002.207	MH0034.scaffold3827_2	1642	1674	35	33	100	A
MH0002.207	MH0037.scaffold36123_2	310	278	35	33	96.97	A
MH0002.207	MH0040.scaffold8331_8	295	263	35	33	96.97	A
MH0002.207	MH0041.scaffold27198_1	1789	1821	35	33	100	A
MH0002.207	MH0043.scaffold13_6	1716	1684	35	33	100	A
MH0002.207	MH0044.C3548278_1	177	145	35	33	100	A
MH0002.207	MH0048.C2529279_1	260	228	35	33	100	A
MH0002.207	MH0050.scaffold24552_2	2014	2046	35	33	100	A
MH0002.207	MH0051.scaffold9453_1	249	217	35	33	100	A
MH0002.207	MH0053.scaffold61194_3	1586	1554	35	33	100	A
MH0002.207	MH0054.scaffold25122_2	808	776	35	33	100	A
MH0002.207	MH0055.scaffold27621_1	2167	2135	35	33	100	A
MH0002.207	MH0056.scaffold22557_1	414	382	35	33	100	A
MH0002.207	MH0057.C3677170_1	540	508	35	33	100	A
MH0002.207	MH0059.scaffold19386_6	1887	1855	35	33	100	A
MH0002.207	MH0060.scaffold105476_1	166	198	35	33	100	A
MH0002.207	MH0063.scaffold8764_1	1992	2024	35	33	100	A
MH0002.207	MH0065.scaffold10308_1	39	71	35	33	100	A
MH0002.207	MH0072.scaffold6076_1	366	334	35	33	100	A
MH0002.207	MH0073.scaffold83089_1	625	593	35	33	100	A
MH0002.207	MH0076.C2853850_1	959	991	35	33	100	A
MH0002.207	MH0077.scaffold12615_1	2322	2290	35	33	100	A
MH0002.207	MH0081.C3744065_1	959	991	35	33	100	A
MH0002.207	MH0082.scaffold8272_2	754	786	35	33	100	A
MH0002.207	MH0086.scaffold10615_9	3010	3042	35	33	100	A
MH0002.207	O2.UC-12.C3422202_1	216	248	35	33	100	A
MH0002.210	O2.UC-23.scaffold22093_1	295	263	35	33	100	A
MH0002.211	MH0060.scaffold59325_1	1783	1753	35	31	93.55	A
MH0002.213	MH0004.scaffold47854_2	1074	1106	35	33	100	A
MH0002.213	MH0006.scaffold284808_1	170	138	35	33	100	A
MH0002.213	MH0009.scaffold1148_4	1106	1074	35	33	100	A
MH0002.213	MH0012.scaffold17579_2	1520	1488	35	33	100	A
MH0002.213	MH0014.scaffold21166_5	8091	8123	35	33	100	A
MH0002.213	MH0021.C2053603_1	644	676	35	33	100	A
MH0002.213	MH0025.scaffold21558_4	546	578	35	33	100	A
MH0002.213	MH0030.scaffold69015_1	295	263	35	33	100	A
MH0002.213	MH0031.scaffold7856_3	213	181	35	33	100	A
MH0002.213	MH0032.scaffold13211_4	147	115	35	33	100	A
MH0002.213	MH0034.scaffold3827_8	5105	5073	35	33	100	A
MH0002.213	MH0037.scaffold38862_9	642	674	35	33	100	A
MH0002.213	MH0038.scaffold78584_1	1415	1447	35	33	100	A
MH0002.213	MH0040.scaffold80948_2	579	611	35	33	100	A
MH0002.213	MH0041.scaffold7356_1	1429	1397	35	33	100	A
MH0002.213	MH0043.scaffold44241_4	3777	3745	35	33	100	A
MH0002.213	MH0044.scaffold15568_3	389	357	35	33	100	A
MH0002.213	MH0046.scaffold17613_2	564	596	35	33	100	A
MH0002.213	MH0049.scaffold23841_1	1578	1610	35	33	100	A
MH0002.213	MH0050.scaffold5063_1	210	178	35	33	100	A
MH0002.213	MH0051.scaffold59469_1	1989	2021	35	33	100	A
MH0002.213	MH0053.scaffold5460_20	584	552	35	33	100	A
MH0002.213	MH0054.scaffold28151_5	3591	3623	35	33	100	A
MH0002.213	MH0055.scaffold76784_3	1392	1424	35	33	100	A
MH0002.213	MH0056.scaffold7277_4	3707	3675	35	33	100	A
MH0002.213	MH0057.C3708546_1	406	377	35	30	100	A
MH0002.213	MH0059.scaffold20233_2	726	758	35	33	100	A
MH0002.213	MH0060.scaffold35610_2	1392	1424	35	33	100	A
MH0002.213	MH0063.scaffold17733_2	1951	1983	35	33	100	A
MH0002.213	MH0065.C4660196_1	859	827	35	33	100	A
MH0002.213	MH0066.scaffold20119_1	241	209	35	33	100	A
MH0002.213	MH0073.scaffold44157_1	161	131	35	31	96.77	A
MH0002.213	MH0074.scaffold413_5	232	200	35	33	100	A
MH0002.213	MH0077.scaffold1017_3	292	260	35	33	100	A
MH0002.213	MH0081.scaffold296_1	2124	2156	35	33	100	A
MH0002.213	MH0082.scaffold76784_2	387	419	35	33	100	A
MH0002.213	MH0083.scaffold19276_1	1441	1409	35	33	100	A
MH0002.213	MH0086.scaffold10615_3	1388	1356	35	33	100	A
MH0002.213	V1.UC-18.scaffold8042_3	1525	1557	35	33	100	A
MH0002.215	O2.UC-18.scaffold3994_4	363	330	35	34	94.12	A
MH0002.215	V1.CD-9.scaffold27862_3	2728	2761	35	34	91.18	A
MH0002.218	O2.UC-23.scaffold30120_5	508	540	35	33	100	A
MH0002.221	MH0002.scaffold83742_3	1288	1320	35	33	100	A
MH0002.221	MH0004.scaffold51113_2	858	890	35	33	100	A
MH0002.221	MH0006.scaffold41806_3	462	430	35	33	100	A
MH0002.221	MH0009.scaffold71633_5	2494	2462	35	33	100	A
MH0002.221	MH0011.scaffold8744_1	1408	1434	35	27	100	N
MH0002.221	MH0012.scaffold11901_2	530	562	35	33	100	A
MH0002.221	MH0014.scaffold17131_2	595	617	35	23	100	N
MH0002.221	MH0014.scaffold21166_2	1676	1644	35	33	100	A
MH0002.221	MH0021.scaffold71712_1	1613	1645	35	33	96.97	A
MH0002.221	MH0022.scaffold19073_8	877	845	35	33	100	A
MH0002.221	MH0025.C3582844_1	608	636	35	29	100	N
MH0002.221	MH0030.scaffold14587_2	3420	3388	35	33	100	A
MH0002.221	MH0031.scaffold32996_2	1327	1359	35	33	100	A
MH0002.221	MH0032.scaffold9255_5	1200	1168	35	33	96.97	A
MH0002.221	MH0034.scaffold16991_2	141	173	35	33	100	A
MH0002.221	MH0036.scaffold82049_1	3435	3403	35	33	100	A
MH0002.221	MH0037.scaffold48412_2	132	164	35	33	100	A
MH0002.221	MH0038.scaffold41380_5	3419	3387	35	33	100	A
MH0002.221	MH0041.scaffold9672_5	1206	1174	35	33	100	A
MH0002.221	MH0043.scaffold89714_6	1370	1338	35	33	100	A
MH0002.221	MH0044.scaffold69274_1	101	133	35	33	100	A
MH0002.221	MH0046.scaffold6277_6	781	749	35	33	100	A
MH0002.221	MH0050.scaffold5063_7	132	164	35	33	100	A
MH0002.221	MH0051.scaffold28163_1	1032	1064	35	33	100	A
MH0002.221	MH0054.scaffold1777_6	1118	1150	35	33	100	A
MH0002.221	MH0055.scaffold1715_4	3201	3169	35	33	100	A
MH0002.221	MH0056.scaffold48189_3	402	434	35	33	100	A
MH0002.221	MH0059.scaffold10548_4	531	563	35	33	100	A
MH0002.221	MH0060.scaffold18718_1	554	586	35	33	100	A
MH0002.221	MH0063.scaffold95134_2	4098	4066	35	33	100	A
MH0002.221	MH0065.scaffold94300_1	95	127	35	33	100	A
MH0002.221	MH0066.C3383522_1	41	73	35	33	100	A
MH0002.221	MH0070.scaffold88975_5	125	157	35	33	100	A
MH0002.221	MH0072.scaffold8612_1	397	365	35	33	100	A
MH0002.221	MH0073.scaffold58582_4	888	856	35	33	100	A
MH0002.221	MH0076.scaffold67805_1	3402	3370	35	33	100	A
MH0002.221	MH0077.scaffold8415_4	992	960	35	33	100	A
MH0002.221	MH0081.scaffold2212_3	1076	1108	35	33	100	A
MH0002.221	MH0085.scaffold15692_8	1000	975	35	26	100	N
MH0002.221	MH0086.scaffold10615_6	2976	3008	35	33	100	A
MH0002.221	O2.UC-18.scaffold29010_3	393	367	35	27	100	N
MH0002.221	O2.UC-24.scaffold44141_1	632	664	35	33	100	A
MH0002.221	V1.CD-9.scaffold29655_2	125	157	35	33	93.94	A
MH0002.221	V1.UC-18.scaffold34792_4	1019	987	35	33	100	A
MH0002.221	V1.UC-8.scaffold29057_1	751	783	35	33	100	A
MH0002.221	V1.UC-9.scaffold7088_3	2769	2743	35	27	100	N
MH0002.225	V1.CD-3.scaffold2667_3	9596	9566	34	31	96.77	A
MH0002.225	V1.UC-9.scaffold20022_3	1799	1831	34	33	100	A
MH0002.23	V1.UC-19.scaffold27661_5	3018	3051	34	34	94.12	A
MH0002.230	MH0047.C1860326_1	106	81	34	26	100	N
MH0002.230	MH0050.scaffold88735_1	2585	2555	34	31	100	A
MH0002.232	MH0002.scaffold29321_1	250	278	34	29	100	A
MH0002.232	MH0051.C2091555_1	160	132	34	29	100	A
MH0002.232	MH0071.scaffold450_3	1010	1038	34	29	100	A
MH0002.232	MH0080.scaffold39550_1	1170	1142	34	29	96.55	A
MH0002.232	V1.CD-9.scaffold78100_1	160	132	34	29	96.55	A
MH0002.238	MH0012.scaffold25621_1	9302	9269	34	34	97.06	A
MH0002.238	MH0035.scaffold9735_11	14104	14137	34	34	97.06	A
MH0002.238	MH0050.scaffold70414_1	81	114	34	34	97.06	A
MH0002.239	MH0043.scaffold79916_4	1875	1908	34	34	100	Y
MH0002.239	MH0044.C3631638_1	1517	1550	34	34	100	Y
MH0002.239	V1.CD-15.scaffold20141_3	468	499	34	32	100	A
MH0002.239	V1.UC-10.scaffold89658_1	1107	1074	34	34	100	Y
MH0002.24	MH0013.C1608810_1	173	197	32	25	100	N
MH0002.24	MH0023.C1311038_1	156	180	32	25	100	N
MH0002.244	MH0012.scaffold83059_4	941	973	33	33	96.97	A
MH0002.244	MH0015.scaffold33910_3	2586	2554	33	33	96.97	A
MH0002.244	MH0026.scaffold10163_5	3037	3069	33	33	96.97	A
MH0002.244	MH0070.scaffold115081_1	4311	4343	33	33	96.97	A
MH0002.244	MH0072.scaffold59530_1	2609	2577	33	33	96.97	A
MH0002.244	MH0075.scaffold89391_2	367	335	33	33	93.94	A
MH0002.245	MH0010.C1326318_1	4293	4322	33	30	93.33	A
MH0002.245	MH0015.C1737611_1	4296	4325	33	30	93.33	A
MH0002.245	MH0028.scaffold24740_12	11638	11609	33	30	93.33	A
MH0002.245	MH0037.scaffold72259_2	3217	3188	33	30	96.67	A
MH0002.245	MH0039.scaffold83195_1	967	938	33	30	96.67	A
MH0002.245	MH0048.scaffold69797_1	922	893	33	30	96.67	A
MH0002.245	MH0054.scaffold80739_1	1215	1244	33	30	93.33	A
MH0002.245	MH0066.scaffold60166_1	3101	3072	33	30	96.67	A
MH0002.245	MH0085.scaffold37908_3	5921	5950	33	30	93.33	A
MH0002.245	MH0086.scaffold103535_1	1679	1708	33	30	96.67	A
MH0002.245	O2.UC-17.scaffold37819_1	630	659	33	30	93.33	A
MH0002.245	O2.UC-4.scaffold56118_1	4298	4327	33	30	96.67	A
MH0002.245	V1.CD-4.scaffold80570_2	2175	2146	33	30	96.67	A
MH0002.245	V1.CD-9.scaffold75967_2	10449	10470	33	22	100	N
MH0002.247	MH0004.C1522612_1	1271	1301	33	31	100	A
MH0002.247	MH0008.C1725198_1	1309	1279	33	31	96.77	A
MH0002.247	MH0009.scaffold49741_1	842	812	33	31	96.77	A
MH0002.247	MH0017.C1490779_1	1049	1079	33	31	100	A
MH0002.247	MH0022.C1741702_1	1271	1301	33	31	100	A
MH0002.247	MH0032.scaffold55353_1	1250	1280	33	31	96.77	A
MH0002.247	MH0033.scaffold87914_1	160	190	33	31	96.77	A
MH0002.247	MH0046.scaffold67400_2	2093	2063	33	31	96.77	A
MH0002.247	MH0052.scaffold15751_1	27	57	33	31	96.77	A
MH0002.247	MH0056.scaffold82972_2	1028	1058	33	31	96.77	A
MH0002.247	MH0057.scaffold19926_1	2058	2088	33	31	96.77	A
MH0002.247	MH0059.scaffold47188_1	79	49	33	31	96.77	A
MH0002.247	MH0064.scaffold23105_2	650	620	33	31	100	A
MH0002.247	MH0066.C3439962_1	1622	1652	33	31	100	A
MH0002.247	MH0068.scaffold9737_2	262	292	33	31	96.77	A
MH0002.247	MH0076.scaffold74325_1	2400	2370	33	31	100	A
MH0002.247	MH0077.C4572879_1	1300	1270	33	31	100	A
MH0002.247	MH0079.C1991746_1	284	314	33	31	100	A
MH0002.247	MH0086.scaffold16371_3	144	114	33	31	96.77	A
MH0002.247	O2.UC-16.scaffold5709_1	1273	1303	33	31	100	A
MH0002.247	O2.UC-24.scaffold4191_2	468	438	33	31	96.77	A
MH0002.247	V1.CD-3.scaffold79090_1	2322	2292	33	31	96.77	A
MH0002.247	V1.CD-8.scaffold117712_2	750	780	33	31	96.77	A
MH0002.247	V1.UC-6.scaffold885_1	127	157	33	31	96.77	A
MH0002.248	MH0045.scaffold46659_3	274	242	33	33	96.97	A
MH0002.248	V1.CD-4.scaffold80125_1	1864	1896	33	33	96.97	A
MH0002.25	O2.UC-13.scaffold51468_7	284	317	34	34	97.06	A
MH0002.25	V1.UC-19.scaffold12251_2	353	386	34	34	97.06	A
MH0002.25	unmapped_K23_L70.scaffold570132_1	170	137	34	34	97.06	A
MH0002.251	MH0045.scaffold94181_1	1201	1230	32	30	100	A
MH0002.255	MH0059.scaffold98_3	1605	1578	32	28	96.43	A
MH0002.255	V1.UC-19.scaffold27661_5	4386	4355	32	32	96.88	A
MH0002.258	MH0037.scaffold45247_2	1997	2026	32	30	93.33	A
MH0002.265	MH0006.scaffold162416_1	183	154	31	30	100	A
MH0002.265	MH0033.scaffold53995_1	443	472	31	30	100	A
MH0002.265	MH0038.scaffold35696_3	396	367	31	30	100	A
MH0002.265	MH0039.scaffold86283_1	443	472	31	30	100	A
MH0002.265	MH0045.scaffold84302_1	2193	2223	31	31	100	Y
MH0002.265	MH0048.C2519879_1	187	158	31	30	100	A
MH0002.265	MH0050.scaffold76886_1	579	550	31	30	100	A
MH0002.265	MH0077.scaffold39905_2	1895	1924	31	30	100	A
MH0002.265	O2.UC-12.scaffold10256_1	11968	11939	31	30	100	A
MH0002.265	V1.CD-11.scaffold2389_1	2184	2213	31	30	100	A
MH0002.265	V1.CD-14.scaffold105877_1	426	455	31	30	100	A
MH0002.265	V1.CD-15.scaffold20141_2	1250	1221	31	30	100	A
MH0002.266	MH0003.scaffold39547_1	2758	2729	30	30	96.67	A
MH0002.266	MH0010.C1326412_1	4608	4579	30	30	96.67	A
MH0002.266	MH0012.scaffold103004_3	9172	9201	30	30	96.67	A
MH0002.266	MH0015.C1730674_1	146	175	30	30	96.67	A
MH0002.266	MH0028.scaffold15006_4	11770	11799	30	30	96.67	A
MH0002.266	MH0037.scaffold37846_2	4971	4942	30	30	96.67	A
MH0002.266	MH0039.scaffold36176_1	944	915	30	30	96.67	A
MH0002.266	MH0051.C2106949_1	659	630	30	30	96.67	A
MH0002.266	MH0054.scaffold40688_1	2757	2728	30	30	96.67	A
MH0002.266	MH0059.C3399609_1	107	136	30	30	96.67	A
MH0002.266	MH0066.scaffold73369_1	2740	2711	30	30	96.67	A
MH0002.266	MH0085.scaffold37908_6	18673	18702	30	30	96.67	A
MH0002.266	MH0086.scaffold111034_1	8061	8090	30	30	96.67	A
MH0002.266	O2.UC-17.C8782688_1	2207	2236	30	30	96.67	A
MH0002.266	O2.UC-4.scaffold53812_1	2750	2721	30	30	96.67	A
MH0002.266	V1.CD-9.scaffold2149_3	12567	12596	30	30	96.67	A
MH0002.266	V1.UC-10.scaffold73440_5	93	122	30	30	96.67	A
MH0002.273	MH0008.scaffold2096_11	105	133	29	29	100	Y
MH0002.273	MH0012.scaffold119530_2	3880	3852	29	29	100	Y
MH0002.273	MH0021.scaffold43351_1	513	485	29	29	96.55	A
MH0002.273	MH0032.scaffold1671_6	3978	4006	29	29	100	Y
MH0002.273	MH0035.scaffold102728_1	141	113	29	29	96.55	A
MH0002.273	MH0042.scaffold4400_3	301	273	29	29	100	Y
MH0002.273	MH0048.scaffold69577_1	67	95	29	29	100	Y
MH0002.273	MH0049.scaffold36561_1	106	134	29	29	100	Y
MH0002.273	MH0059.scaffold3152_1	3903	3875	29	29	100	Y
MH0002.273	MH0060.scaffold460_3	379	407	29	29	100	Y
MH0002.273	MH0061.scaffold21645_5	500	528	29	29	96.55	A
MH0002.273	MH0065.scaffold93361_2	485	457	29	29	100	Y
MH0002.273	MH0068.scaffold23178_4	3983	4011	29	29	100	Y
MH0002.273	MH0076.scaffold10999_1	521	549	29	29	100	Y
MH0002.273	MH0084.scaffold1708_6	768	796	29	29	100	Y
MH0002.273	MH0085.scaffold10046_5	931	959	29	29	100	Y
MH0002.273	MH0086.scaffold2675_1	2512	2484	29	29	100	Y
MH0002.273	O2.UC-1.scaffold30032_4	3890	3862	29	29	100	Y
MH0002.273	O2.UC-4.scaffold6956_2	1892	1920	29	29	100	Y
MH0002.273	V1.UC-14.scaffold3509_2	1790	1818	29	29	100	Y
MH0002.273	V1.UC-15.scaffold44680_3	763	791	29	29	100	Y
MH0002.273	V1.UC-19.scaffold7701_5	2678	2650	29	29	100	Y
MH0002.278	MH0002.scaffold46943_1	326	298	29	29	100	Y
MH0002.278	MH0013.scaffold1174_26	656	684	29	29	100	Y
MH0002.278	MH0016.scaffold38328_3	20384	20412	29	29	100	Y
MH0002.278	MH0028.scaffold16301_5	5233	5261	29	29	100	Y
MH0002.278	MH0032.scaffold54743_4	5186	5214	29	29	100	Y
MH0002.278	MH0040.scaffold33849_2	448	420	29	29	100	Y
MH0002.278	MH0050.scaffold15119_2	5227	5255	29	29	100	Y
MH0002.278	MH0054.scaffold21476_18	1838	1866	29	29	100	Y
MH0002.278	MH0055.scaffold8216_4	719	691	29	29	100	Y
MH0002.278	MH0058.scaffold34187_1	468	440	29	29	100	Y
MH0002.278	MH0061.scaffold8078_5	1846	1874	29	29	100	Y
MH0002.278	MH0064.scaffold11509_6	27911	27939	29	29	100	Y
MH0002.278	MH0069.scaffold24103_1	256	228	29	29	100	Y
MH0002.278	MH0075.scaffold27183_3	28137	28165	29	29	100	Y
MH0002.278	MH0086.scaffold32390_1	4959	4931	29	29	100	Y
MH0002.278	O2.UC-21.scaffold11720_2	1883	1911	29	29	100	Y
MH0002.278	O2.UC-22.scaffold1175_7	5234	5262	29	29	100	Y
MH0002.278	V1.CD-12.scaffold17253_1	4959	4931	29	29	100	Y
MH0002.278	V1.CD-14.scaffold27476_4	349	321	29	29	100	Y
MH0002.278	V1.CD-9.scaffold77327_3	4700	4728	29	29	100	Y
MH0002.278	V1.UC-8.scaffold6194_1	14982	15010	29	29	100	Y
MH0002.281	MH0002.scaffold53935_2	343	316	28	28	100	Y
MH0002.281	MH0012.scaffold27237_1	782	809	28	28	100	Y
MH0002.281	MH0024.scaffold60415_2	325	298	28	28	100	Y
MH0002.281	MH0025.C3641788_1	403	376	28	28	100	Y
MH0002.281	MH0040.scaffold84019_2	382	355	28	28	100	Y
MH0002.281	MH0042.scaffold117464_2	1601	1628	28	28	100	Y
MH0002.281	MH0043.scaffold7688_1	2298	2325	28	28	100	Y
MH0002.281	MH0056.scaffold1017_2	209	182	28	28	100	Y
MH0002.281	MH0063.scaffold68942_2	1156	1129	28	28	100	Y
MH0002.281	MH0066.scaffold54550_1	787	760	28	28	100	Y
MH0002.281	MH0068.scaffold2876_5	1250	1277	28	28	100	Y
MH0002.281	MH0069.scaffold77205_1	2308	2335	28	28	100	Y
MH0002.281	MH0075.scaffold77976_5	204	231	28	28	100	Y
MH0002.281	MH0077.scaffold560_4	462	489	28	28	100	Y
MH0002.281	MH0081.scaffold88968_1	2392	2419	28	28	100	Y
MH0002.281	MH0082.scaffold82462_2	1272	1299	28	28	100	Y
MH0002.281	O2.UC-18.scaffold28347_1	3037	3064	28	28	100	Y
MH0002.281	O2.UC-22.scaffold52175_2	391	364	28	28	100	Y
MH0002.281	V1.CD-3.scaffold9488_6	206	233	28	28	100	Y
MH0002.281	V1.CD-4.scaffold71229_3	555	582	28	28	100	Y
MH0002.281	V1.CD-9.scaffold39230_1	727	700	28	28	100	Y
MH0002.281	V1.UC-13.scaffold4711_4	499	526	28	28	100	Y
MH0002.284	MH0071.scaffold20609_2	3075	3051	27	25	100	A
MH0002.285	MH0002.scaffold2753_3	1506	1481	26	26	100	Y
MH0002.285	MH0006.scaffold31632_1	840	815	26	26	100	Y
MH0002.285	MH0012.scaffold6928_6	469	494	26	26	100	Y
MH0002.285	MH0013.scaffold44752_4	4056	4081	26	26	100	Y
MH0002.285	MH0014.scaffold14553_3	3586	3561	26	26	100	Y
MH0002.285	MH0020.scaffold2112_4	136	111	26	26	100	Y
MH0002.285	MH0021.C1985036_1	107	132	26	26	100	Y
MH0002.285	MH0024.scaffold65530_2	388	363	26	26	100	Y
MH0002.285	MH0025.scaffold25740_2	717	692	26	26	100	Y
MH0002.285	MH0033.scaffold28321_10	1001	1026	26	26	100	Y
MH0002.285	MH0035.scaffold52086_2	216	191	26	26	100	Y
MH0002.285	MH0036.scaffold55935_6	2080	2105	26	26	100	Y
MH0002.285	MH0039.scaffold22804_7	228	253	26	26	100	Y
MH0002.285	MH0043.scaffold5947_1	460	435	26	26	96.15	A
MH0002.285	MH0051.C2134557_1	155	130	26	26	100	Y
MH0002.285	MH0053.scaffold28314_3	60	85	26	26	100	Y
MH0002.285	MH0055.scaffold49986_13	474	499	26	26	100	Y
MH0002.285	MH0059.scaffold6548_8	932	957	26	26	100	Y
MH0002.285	MH0062.scaffold6689_2	447	422	26	26	100	Y
MH0002.285	MH0063.scaffold16729_11	997	1022	26	26	100	Y
MH0002.285	MH0065.scaffold14479_7	181	156	26	26	100	Y
MH0002.285	MH0069.scaffold88351_1	1583	1558	26	26	100	Y
MH0002.285	MH0080.C3330828_1	2912	2937	26	26	100	Y
MH0002.285	MH0081.scaffold7340_2	2144	2169	26	26	100	Y
MH0002.285	MH0083.scaffold10421_4	2859	2884	26	26	96.15	A
MH0002.285	MH0084.scaffold47066_4	55	30	26	26	100	Y
MH0002.285	O2.UC-19.scaffold60269_2	407	382	26	26	100	Y
MH0002.285	V1.CD-13.scaffold27022_2	1500	1475	26	26	96.15	A
MH0002.285	V1.UC-14.C4244803_1	320	295	26	26	100	Y
MH0002.285	V1.UC-18.scaffold43984_6	501	526	26	26	96.15	A
MH0002.285	V1.UC-6.scaffold9175_7	6597	6572	26	26	100	Y
MH0002.287	MH0002.scaffold36103_3	467	434	50	34	97.06	N
MH0002.287	MH0006.scaffold77618_2	127	160	50	34	97.06	N
MH0002.287	MH0009.scaffold5402_2	64	97	50	34	94.12	N
MH0002.287	MH0012.scaffold94631_1	281	314	50	34	97.06	N
MH0002.287	MH0014.C4787554_1	658	625	50	34	97.06	N
MH0002.287	MH0016.scaffold13185_3	494	461	50	34	97.06	N
MH0002.287	MH0017.scaffold12648_3	35	68	50	34	97.06	N
MH0002.287	MH0030.scaffold3841_2	1837	1804	50	34	97.06	N
MH0002.287	MH0031.scaffold15768_4	5382	5415	50	34	97.06	N
MH0002.287	MH0032.scaffold24563_2	293	326	50	34	97.06	N
MH0002.287	MH0034.scaffold3827_2	1888	1855	50	34	97.06	N
MH0002.287	MH0036.scaffold61338_1	1389	1422	50	34	97.06	N
MH0002.287	MH0037.scaffold36123_2	64	97	50	34	97.06	N
MH0002.287	MH0042.scaffold5599_3	69	36	50	34	97.06	N
MH0002.287	MH0043.scaffold13_6	1470	1503	50	34	97.06	N
MH0002.287	MH0048.C2529279_1	14	47	50	34	97.06	N
MH0002.287	MH0050.scaffold24552_2	2260	2227	50	34	97.06	N
MH0002.287	MH0051.scaffold9453_1	3	36	50	34	97.06	N
MH0002.287	MH0054.scaffold25122_2	562	595	50	34	97.06	N
MH0002.287	MH0055.scaffold27621_1	1921	1954	50	34	97.06	N
MH0002.287	MH0056.scaffold22557_1	168	201	50	34	97.06	N
MH0002.287	MH0057.C3677170_1	294	327	50	34	97.06	N
MH0002.287	MH0059.scaffold19386_6	1641	1674	50	34	97.06	N
MH0002.287	MH0063.scaffold8764_1	2238	2205	50	34	97.06	N
MH0002.287	MH0065.scaffold10308_1	285	252	50	34	94.12	N
MH0002.287	MH0070.scaffold73780_3	37	4	50	34	97.06	N
MH0002.287	MH0076.C2853850_1	1205	1172	50	34	97.06	N
MH0002.287	MH0077.scaffold12615_1	2076	2109	50	34	97.06	N
MH0002.287	MH0081.C3744065_1	1205	1172	50	34	97.06	N
MH0002.287	MH0086.scaffold10615_9	3256	3223	50	34	97.06	N
MH0002.295	MH0002.scaffold83742_3	1319	1288	47	32	100	N
MH0002.295	MH0004.scaffold51113_2	889	858	47	32	100	N
MH0002.295	MH0006.scaffold41806_3	431	462	47	32	100	N
MH0002.295	MH0009.scaffold71633_5	2463	2494	47	32	100	N
MH0002.295	MH0011.scaffold8744_1	1433	1408	47	26	100	N
MH0002.295	MH0012.scaffold11901_2	561	530	47	32	100	N
MH0002.295	MH0014.scaffold21166_2	1645	1676	47	32	100	N
MH0002.295	MH0021.scaffold71712_1	1644	1613	47	32	96.88	N
MH0002.295	MH0022.scaffold19073_8	846	877	47	32	100	N
MH0002.295	MH0025.C3582844_1	636	608	47	29	100	N
MH0002.295	MH0030.scaffold14587_2	3389	3420	47	32	100	N
MH0002.295	MH0031.scaffold32996_2	1358	1327	47	32	100	N
MH0002.295	MH0032.scaffold9255_5	1169	1200	47	32	96.88	N
MH0002.295	MH0034.scaffold16991_2	172	141	47	32	100	N
MH0002.295	MH0036.scaffold82049_1	3404	3435	47	32	100	N
MH0002.295	MH0037.scaffold48412_2	163	132	47	32	100	N
MH0002.295	MH0038.scaffold41380_5	3388	3419	47	32	100	N
MH0002.295	MH0041.scaffold9672_5	1175	1206	47	32	100	N
MH0002.295	MH0043.scaffold89714_6	1339	1370	47	32	100	N
MH0002.295	MH0044.scaffold69274_1	132	101	47	32	100	N
MH0002.295	MH0046.scaffold6277_6	750	781	47	32	100	N
MH0002.295	MH0050.scaffold5063_7	163	132	47	32	100	N
MH0002.295	MH0051.scaffold28163_1	1063	1032	47	32	100	N
MH0002.295	MH0054.scaffold1777_6	1149	1118	47	32	100	N
MH0002.295	MH0055.scaffold1715_4	3170	3201	47	32	100	N
MH0002.295	MH0056.scaffold48189_3	433	402	47	32	100	N
MH0002.295	MH0059.scaffold10548_4	562	531	47	32	100	N
MH0002.295	MH0060.scaffold18718_1	585	554	47	32	100	N
MH0002.295	MH0063.scaffold95134_2	4067	4098	47	32	100	N
MH0002.295	MH0065.scaffold94300_1	126	95	47	32	100	N
MH0002.295	MH0066.C3383522_1	72	41	47	32	100	N
MH0002.295	MH0070.scaffold88975_5	156	125	47	32	100	N
MH0002.295	MH0072.scaffold8612_1	366	397	47	32	100	N
MH0002.295	MH0073.scaffold58582_4	857	888	47	32	100	N
MH0002.295	MH0076.scaffold67805_1	3371	3402	47	32	100	N
MH0002.295	MH0077.scaffold8415_4	961	992	47	32	100	N
MH0002.295	MH0081.scaffold2212_3	1107	1076	47	32	100	N
MH0002.295	MH0085.scaffold15692_8	976	1000	47	25	100	N
MH0002.295	MH0086.scaffold10615_6	3007	2976	47	32	100	N
MH0002.295	O2.UC-18.scaffold29010_3	368	393	47	26	100	N
MH0002.295	O2.UC-24.scaffold44141_1	663	632	47	32	100	N
MH0002.295	V1.CD-9.scaffold29655_2	156	125	47	32	93.75	N
MH0002.295	V1.UC-18.scaffold34792_4	988	1019	47	32	100	N
MH0002.295	V1.UC-8.scaffold29057_1	782	751	47	32	100	N
MH0002.295	V1.UC-9.scaffold7088_3	2744	2769	47	26	100	N
MH0002.296	MH0047.C1860326_1	116	81	46	36	94.44	N
MH0002.296	MH0050.scaffold88735_1	2588	2555	46	34	100	N
MH0002.298	MH0006.scaffold8770_1	1178	1206	46	29	96.55	N
MH0002.298	MH0028.scaffold22946_1	683	655	46	29	96.55	N
MH0002.298	MH0038.scaffold17466_2	83	117	46	35	100	N
MH0002.298	MH0039.scaffold6869_3	732	698	46	35	100	N
MH0002.298	MH0070.scaffold108970_1	112	140	46	29	96.55	N
MH0002.300	MH0002.scaffold17977_5	687	716	45	30	100	N
MH0002.300	MH0012.scaffold118798_1	4461	4432	45	30	100	N
MH0002.300	MH0015.scaffold46708_5	1305	1334	45	30	100	N
MH0002.300	MH0019.scaffold49899_1	7543	7572	45	30	100	N
MH0002.300	MH0024.scaffold11220_1	2294	2265	45	30	100	N
MH0002.300	MH0034.scaffold17_26	341	312	45	30	100	N
MH0002.300	MH0035.scaffold9279_6	4379	4350	45	30	100	N
MH0002.300	MH0036.scaffold75808_6	5952	5923	45	30	100	N
MH0002.300	MH0037.scaffold36869_13	434	463	45	30	100	N
MH0002.300	MH0041.scaffold5272_4	3194	3165	45	30	100	N
MH0002.300	MH0042.scaffold19371_2	2086	2115	45	30	100	N
MH0002.300	MH0043.scaffold97854_1	1563	1592	45	30	100	N
MH0002.300	MH0047.scaffold44971_2	379	354	45	26	100	N
MH0002.300	MH0056.C5645583_1	227	198	45	30	100	N
MH0002.300	MH0058.scaffold107533_1	2755	2726	45	30	100	N
MH0002.300	MH0059.scaffold78136_1	4995	4966	45	30	100	N
MH0002.300	MH0060.scaffold4999_8	688	659	45	30	100	N
MH0002.300	MH0065.scaffold54188_18	1219	1248	45	30	100	N
MH0002.300	MH0069.scaffold59860_2	3205	3176	45	30	100	N
MH0002.300	MH0073.scaffold51902_1	1423	1394	45	30	96.67	N
MH0002.300	MH0075.scaffold36494_5	204	175	45	30	100	N
MH0002.300	MH0081.scaffold28218_2	167	196	45	30	100	N
MH0002.300	MH0082.scaffold54695_6	4505	4476	45	30	100	N
MH0002.300	MH0084.scaffold12028_5	2181	2152	45	30	100	N
MH0002.300	MH0086.scaffold23668_3	4938	4909	45	30	100	N
MH0002.300	V1.CD-12.scaffold21350_2	8196	8225	45	30	100	N
MH0002.300	V1.CD-9.scaffold10483_6	3718	3747	45	30	100	N
MH0002.300	V1.UC-19.scaffold6148_14	48609	48638	45	30	100	N
MH0002.303	MH0006.scaffold51567_2	5613	5641	44	29	100	N
MH0002.303	MH0008.scaffold3490_1	15349	15321	44	29	100	N
MH0002.303	MH0011.scaffold1124_1	1223	1251	44	29	100	N
MH0002.303	MH0012.scaffold17247_3	2013	2041	44	29	100	N
MH0002.303	MH0014.scaffold3834_6	275	303	44	29	100	N
MH0002.303	MH0015.scaffold56307_5	915	887	44	29	100	N
MH0002.303	MH0017.scaffold40046_2	665	693	44	29	100	N
MH0002.303	MH0020.scaffold5899_16	1792	1764	44	29	100	N
MH0002.303	MH0025.scaffold39595_1	6233	6261	44	29	100	N
MH0002.303	MH0028.scaffold6596_1	199	171	44	29	100	N
MH0002.303	MH0033.scaffold13277_2	2994	3022	44	29	100	N
MH0002.303	MH0035.scaffold57245_3	314	286	44	29	100	N
MH0002.303	MH0042.scaffold1038_1	2063	2035	44	29	100	N
MH0002.303	MH0044.scaffold5841_1	9232	9260	44	29	100	N
MH0002.303	MH0045.scaffold34799_2	304	332	44	29	100	N
MH0002.303	MH0048.scaffold17848_1	10440	10412	44	29	100	N
MH0002.303	MH0051.C2088665_1	138	110	44	29	100	N
MH0002.303	MH0054.scaffold41862_5	202	230	44	29	96.55	N
MH0002.303	MH0058.scaffold72655_2	3662	3634	44	29	100	N
MH0002.303	MH0059.scaffold10740_1	21892	21920	44	29	100	N
MH0002.303	MH0060.scaffold13209_16	769	797	44	29	100	N
MH0002.303	MH0061.scaffold1118_3	403	431	44	29	100	N
MH0002.303	MH0064.scaffold72124_2	727	699	44	29	100	N
MH0002.303	MH0065.scaffold78419_1	2979	3007	44	29	96.55	N
MH0002.303	MH0067.scaffold34858_1	11505	11477	44	29	100	N
MH0002.303	MH0070.scaffold9144_7	1106	1078	44	29	100	N
MH0002.303	MH0072.scaffold5760_5	2195	2167	44	29	100	N
MH0002.303	MH0073.scaffold11033_5	2658	2686	44	29	100	N
MH0002.303	MH0074.scaffold5879_2	8998	8970	44	29	100	N
MH0002.303	MH0076.scaffold10098_1	1507	1479	44	29	100	N
MH0002.303	MH0077.scaffold43365_1	4892	4920	44	29	100	N
MH0002.303	MH0079.scaffold55822_1	2989	3017	44	29	100	N
MH0002.303	MH0080.scaffold9973_2	8132	8104	44	29	100	N
MH0002.303	MH0081.scaffold8718_1	10569	10541	44	29	100	N
MH0002.303	MH0082.scaffold10804_12	2943	2971	44	29	100	N
MH0002.303	MH0083.scaffold10694_2	5918	5890	44	29	100	N
MH0002.303	O2.UC-1.scaffold5461_1	16070	16042	44	29	100	N
MH0002.303	O2.UC-13.scaffold7894_1	10321	10293	44	29	100	N
MH0002.303	O2.UC-17.scaffold3281_2	16165	16137	44	29	100	N
MH0002.303	O2.UC-19.scaffold11039_3	10356	10328	44	29	100	N
MH0002.303	O2.UC-20.scaffold13991_3	4663	4691	44	29	100	N
MH0002.303	O2.UC-22.scaffold10374_9	7638	7610	44	29	100	N
MH0002.303	V1.CD-12.scaffold11613_1	1261	1289	44	29	100	N
MH0002.303	V1.CD-13.scaffold9065_3	4278	4250	44	29	100	N
MH0002.303	V1.CD-14.scaffold16578_6	10363	10335	44	29	100	N
MH0002.303	V1.CD-3.scaffold4229_6	2588	2616	44	29	100	N
MH0002.303	V1.CD-4.scaffold19353_4	2799	2771	44	29	100	N
MH0002.303	V1.UC-10.scaffold11829_3	16165	16137	44	29	100	N
MH0002.303	V1.UC-13.scaffold16869_1	163	191	44	29	100	N
MH0002.303	V1.UC-17.scaffold4688_26	2089	2117	44	29	100	N
MH0002.303	V1.UC-19.scaffold38224_2	5612	5640	44	29	100	N
MH0002.303	V1.UC-21.scaffold1567_8	1280	1308	44	29	100	N
MH0002.303	V1.UC-6.scaffold60898_1	6702	6730	44	29	100	N
MH0002.303	V1.UC-8.scaffold5836_6	2106	2078	44	29	100	N
MH0002.303	V1.UC-9.scaffold11591_1	13626	13598	44	29	100	N
MH0002.308	O2.UC-23.scaffold22093_1	295	263	40	33	100	N
MH0002.309	unmapped_K23_L70.scaffold499776_2	227	194	40	34	100	N
MH0002.311	MH0002.scaffold7544_4	4106	4071	39	36	100	A
MH0002.311	MH0003.scaffold60001_2	4106	4073	39	34	100	A
MH0002.311	MH0006.scaffold319451_1	513	546	39	34	100	A
MH0002.311	MH0008.C1728584_1	4132	4099	39	34	100	A
MH0002.311	MH0009.scaffold15090_16	2104	2137	39	34	100	A
MH0002.311	MH0010.C1306204_1	719	752	39	34	100	A
MH0002.311	MH0011.scaffold2228_6	26365	26332	39	34	100	A
MH0002.311	MH0012.C18680905_1	499	532	39	34	100	A
MH0002.311	MH0014.scaffold88933_1	1325	1358	39	34	100	A
MH0002.311	MH0015.scaffold9058_5	448	481	39	34	100	A
MH0002.311	MH0016.scaffold2088_1	842	875	39	34	100	A
MH0002.311	MH0018.scaffold3281_6	3304	3337	39	34	100	A
MH0002.311	MH0019.C1464048_1	1274	1241	39	34	100	A
MH0002.311	MH0021.scaffold71644_1	2995	3028	39	34	100	A
MH0002.311	MH0025.C3644138_1	568	601	39	34	100	A
MH0002.311	MH0026.scaffold4684_1	11042	11009	39	34	100	A
MH0002.311	MH0027.scaffold59493_2	391	424	39	34	100	A
MH0002.311	MH0028.scaffold8970_5	628	661	39	34	100	A
MH0002.311	MH0032.scaffold4808_5	827	860	39	34	100	A
MH0002.311	MH0033.C3750384_1	721	754	39	34	100	A
MH0002.311	MH0034.scaffold4886_22	3603	3570	39	34	100	A
MH0002.311	MH0035.C4109815_1	651	684	39	34	100	A
MH0002.311	MH0036.C3600289_1	427	394	39	34	100	A
MH0002.311	MH0037.scaffold77950_1	14626	14593	39	34	100	A
MH0002.311	MH0038.scaffold7854_2	2214	2247	39	34	100	A
MH0002.311	MH0040.scaffold82826_1	9907	9874	39	34	100	A
MH0002.311	MH0041.scaffold49980_1	3153	3120	39	34	100	A
MH0002.311	MH0042.scaffold49984_2	698	731	39	34	100	A
MH0002.311	MH0043.scaffold38554_3	809	842	39	34	100	A
MH0002.311	MH0044.scaffold19622_1	1	23	39	23	100	N
MH0002.311	MH0045.scaffold39784_2	459	492	39	34	100	A
MH0002.311	MH0046.scaffold42712_3	611	644	39	34	100	A
MH0002.311	MH0047.scaffold9692_3	396	429	39	34	97.06	A
MH0002.311	MH0048.scaffold22555_4	4498	4465	39	34	100	A
MH0002.311	MH0049.scaffold11745_1	4272	4305	39	34	100	A
MH0002.311	MH0050.scaffold32334_4	628	661	39	34	100	A
MH0002.311	MH0051.scaffold32671_1	9924	9891	39	34	100	A
MH0002.311	MH0055.scaffold944_4	809	842	39	34	100	A
MH0002.311	MH0056.scaffold146635_2	111	144	39	34	100	A
MH0002.311	MH0057.scaffold6753_5	5723	5690	39	34	100	A
MH0002.311	MH0058.scaffold103290_2	542	575	39	34	100	A
MH0002.311	MH0059.scaffold47078_4	628	661	39	34	100	A
MH0002.311	MH0060.scaffold5782_26	249	282	39	34	100	A
MH0002.311	MH0062.scaffold89948_1	28384	28351	39	34	100	A
MH0002.311	MH0063.scaffold74267_3	314	347	39	34	100	A
MH0002.311	MH0064.scaffold6620_10	4106	4073	39	34	100	A
MH0002.311	MH0065.scaffold1751_2	4215	4248	39	34	100	A
MH0002.311	MH0066.scaffold4679_1	81	114	39	34	100	A
MH0002.311	MH0067.scaffold6525_2	5642	5609	39	34	100	A
MH0002.311	MH0069.scaffold9792_6	5018	4985	39	34	100	A
MH0002.311	MH0070.scaffold775_3	620	653	39	34	100	A
MH0002.311	MH0071.scaffold9571_7	9512	9545	39	34	100	A
MH0002.311	MH0072.scaffold15262_2	126	159	39	34	100	A
MH0002.311	MH0073.scaffold6267_3	1278	1311	39	34	100	A
MH0002.311	MH0075.scaffold6469_5	4106	4073	39	34	100	A
MH0002.311	MH0076.C2881160_1	2849	2816	39	34	100	A
MH0002.311	MH0077.C4554845_1	1005	1038	39	34	100	A
MH0002.311	MH0080.scaffold72450_2	3887	3920	39	34	100	A
MH0002.311	MH0081.scaffold3603_2	628	661	39	34	100	A
MH0002.311	MH0082.scaffold84438_1	4355	4322	39	34	100	A
MH0002.311	MH0084.scaffold3967_4	4057	4090	39	34	100	A
MH0002.311	MH0085.scaffold1659_9	8838	8871	39	34	100	A
MH0002.311	MH0086.scaffold16519_1	3736	3769	39	34	100	A
MH0002.311	O2.UC-12.scaffold1624_2	6509	6542	39	34	100	A
MH0002.311	O2.UC-13.scaffold19687_3	4106	4073	39	34	100	A
MH0002.311	O2.UC-14.scaffold31821_2	628	661	39	34	100	A
MH0002.311	O2.UC-17.scaffold681_2	9025	8992	39	34	100	A
MH0002.311	O2.UC-19.scaffold13522_2	7643	7610	39	34	100	A
MH0002.311	O2.UC-20.scaffold4003_2	628	661	39	34	100	A
MH0002.311	O2.UC-21.scaffold6333_1	2175	2142	39	34	100	A
MH0002.311	O2.UC-22.scaffold2683_1	2821	2788	39	34	100	A
MH0002.311	O2.UC-23.scaffold14539_4	393	360	39	34	100	A
MH0002.311	O2.UC-4.scaffold43887_1	3351	3384	39	34	100	A
MH0002.311	V1.CD-11.scaffold6331_1	651	684	39	34	100	A
MH0002.311	V1.CD-14.scaffold33121_2	628	661	39	34	100	A
MH0002.311	V1.CD-15.scaffold11118_4	4106	4073	39	34	100	A
MH0002.311	V1.CD-3.scaffold1837_10	4106	4073	39	34	100	A
MH0002.311	V1.CD-4.scaffold91185_1	1301	1334	39	34	100	A
MH0002.311	V1.CD-6.scaffold29373_5	2132	2099	39	34	100	A
MH0002.311	V1.CD-8.scaffold90089_2	1209	1242	39	34	100	A
MH0002.311	V1.CD-9.scaffold76135_2	1302	1335	39	34	100	A
MH0002.311	V1.UC-10.scaffold95324_1	819	786	39	34	100	A
MH0002.311	V1.UC-14.scaffold9839_3	4502	4469	39	34	100	A
MH0002.311	V1.UC-17.scaffold4402_8	418	385	39	34	100	A
MH0002.311	V1.UC-18.scaffold69873_1	9792	9759	39	34	100	A
MH0002.311	V1.UC-19.scaffold14681_3	4337	4304	39	34	100	A
MH0002.311	V1.UC-21.scaffold41909_2	4325	4292	39	34	100	A
MH0002.311	V1.UC-6.scaffold56479_3	545	578	39	34	100	A
MH0002.311	V1.UC-7.scaffold48924_1	993	1026	39	34	100	A
MH0002.311	V1.UC-9.scaffold14224_1	7047	7080	39	34	100	A
MH0002.312	MH0003.scaffold46003_1	357	324	39	34	100	A
MH0002.312	MH0009.scaffold21435_1	2496	2463	39	34	100	A
MH0002.312	MH0011.scaffold21116_1	313	346	39	34	100	A
MH0002.312	MH0012.scaffold18451_2	2714	2681	39	34	100	A
MH0002.312	MH0017.C1491689_1	51	18	39	34	100	A
MH0002.312	MH0018.scaffold2283_10	5731	5698	39	34	100	A
MH0002.312	MH0019.C1412516_1	414	447	39	34	100	A
MH0002.312	MH0021.scaffold70236_1	398	431	39	34	100	A
MH0002.312	MH0025.scaffold1217_2	390	356	39	35	91.43	A
MH0002.312	MH0025.scaffold51120_1	358	325	39	34	100	A
MH0002.312	MH0026.scaffold779_5	1885	1852	39	34	100	A
MH0002.312	MH0028.scaffold5968_1	491	524	39	34	100	A
MH0002.312	MH0032.scaffold17021_3	572	605	39	34	100	A
MH0002.312	MH0033.scaffold66298_1	1622	1655	39	34	100	A
MH0002.312	MH0034.scaffold1854_24	732	765	39	34	100	A
MH0002.312	MH0036.scaffold48530_1	197	230	39	34	100	A
MH0002.312	MH0037.scaffold471_4	10055	10088	39	34	100	A
MH0002.312	MH0038.scaffold33364_3	3189	3156	39	34	100	A
MH0002.312	MH0039.scaffold21153_1	2787	2820	39	34	100	A
MH0002.312	MH0040.scaffold5009_1	1703	1736	39	34	100	A
MH0002.312	MH0041.scaffold49551_1	203	236	39	34	100	A
MH0002.312	MH0042.scaffold7138_2	165	132	39	34	100	A
MH0002.312	MH0046.scaffold5202_2	216	249	39	34	100	A
MH0002.312	MH0048.scaffold44807_1	359	392	39	34	100	A
MH0002.312	MH0049.scaffold198_3	5733	5700	39	34	100	A
MH0002.312	MH0050.scaffold3629_1	1061	1094	39	34	100	A
MH0002.312	MH0051.scaffold217_3	15239	15272	39	34	100	A
MH0002.312	MH0055.scaffold10901_2	165	132	39	34	100	A
MH0002.312	MH0060.scaffold86624_1	1473	1440	39	34	100	A
MH0002.312	MH0063.scaffold630_1	1209	1243	39	35	91.43	A
MH0002.312	MH0064.scaffold3438_3	1173	1206	39	34	100	A
MH0002.312	MH0065.scaffold18883_5	10042	10075	39	34	100	A
MH0002.312	MH0067.scaffold7677_2	1685	1718	39	34	100	A
MH0002.312	MH0068.scaffold45296_1	795	828	39	34	100	A
MH0002.312	MH0069.scaffold7884_2	3040	3007	39	34	100	A
MH0002.312	MH0070.scaffold14329_4	334	301	39	34	100	A
MH0002.312	MH0071.scaffold24_3	10053	10086	39	34	100	A
MH0002.312	MH0075.scaffold11871_1	595	628	39	34	100	A
MH0002.312	MH0081.scaffold45135_1	491	524	39	34	100	A
MH0002.312	MH0082.scaffold91206_1	398	431	39	34	100	A
MH0002.312	MH0083.scaffold51135_2	335	302	39	34	100	A
MH0002.312	MH0084.scaffold8351_5	219	252	39	34	91.18	A
MH0002.312	MH0085.scaffold7708_2	3141	3108	39	34	100	A
MH0002.312	MH0086.scaffold986_4	174	207	39	34	100	A
MH0002.312	O2.UC-1.scaffold55736_2	57	90	39	34	100	A
MH0002.312	O2.UC-11.scaffold11294_1	1	34	39	34	100	A
MH0002.312	O2.UC-13.scaffold14436_1	496	529	39	34	100	A
MH0002.312	O2.UC-14.scaffold4822_2	335	302	39	34	100	A
MH0002.312	O2.UC-17.scaffold628_1	65	98	39	34	100	A
MH0002.312	O2.UC-19.scaffold8256_3	80	47	39	34	100	A
MH0002.312	O2.UC-23.scaffold70596_1	915	948	39	34	100	A
MH0002.312	O2.UC-4.scaffold811_1	3051	3018	39	34	100	A
MH0002.312	V1.CD-13.scaffold46917_1	477	444	39	34	100	A
MH0002.312	V1.CD-3.scaffold3948_1	595	628	39	34	100	A
MH0002.312	V1.CD-4.scaffold12553_4	797	764	39	34	100	A
MH0002.312	V1.CD-8.scaffold13567_2	794	827	39	34	100	A
MH0002.312	V1.CD-9.scaffold83_1	2303	2270	39	34	100	A
MH0002.312	V1.UC-10.scaffold69170_1	1135	1168	39	34	100	A
MH0002.312	V1.UC-13.scaffold47747_1	262	229	39	34	100	A
MH0002.312	V1.UC-14.scaffold3961_2	468	501	39	34	100	A
MH0002.312	V1.UC-17.scaffold4461_3	3273	3306	39	34	100	A
MH0002.312	V1.UC-18.scaffold19852_3	3141	3108	39	34	100	A
MH0002.312	V1.UC-21.scaffold10076_7	572	605	39	34	100	A
MH0002.312	V1.UC-6.scaffold5134_1	188	155	39	34	100	A
MH0002.312	V1.UC-8.scaffold19570_1	1901	1934	39	34	100	A
MH0002.312	V1.UC-9.scaffold12070_3	2336	2369	39	34	100	A
MH0002.316	MH0045.scaffold18909_10	2135	2170	39	36	97.22	A
MH0002.316	MH0046.scaffold42435_5	1037	1068	39	32	96.88	N
MH0002.316	MH0075.scaffold81613_1	104	139	39	36	97.22	A
MH0002.316	MH0079.scaffold28335_2	807	776	39	32	96.88	N
MH0002.316	V1.UC-8.scaffold24810_2	9629	9594	39	36	97.22	A
MH0002.316	unmapped_K23_L70.scaffold841096_1	384	415	39	32	96.88	N
MH0002.317	MH0007.C1983450_1	12225	12258	39	34	97.06	A
MH0002.317	MH0059.scaffold98_1	1758	1725	39	34	100	A
MH0002.317	V1.UC-14.scaffold70192_1	36	3	39	34	97.06	A
MH0002.317	V1.UC-19.scaffold27661_1	985	952	39	34	100	A
MH0002.318	MH0006.scaffold162416_1	654	685	39	32	100	N
MH0002.318	MH0039.scaffold80356_1	135	102	39	34	100	A
MH0002.318	MH0045.scaffold89020_2	448	415	39	34	100	A
MH0002.318	MH0067.scaffold17529_1	24497	24530	39	34	100	A
MH0002.318	MH0076.scaffold18064_2	380	347	39	34	100	A
MH0002.318	O2.UC-23.scaffold28731_1	1894	1927	39	34	100	A
MH0002.322	MH0014.scaffold8368_1	193	226	39	34	100	A
MH0002.322	MH0018.scaffold16695_1	1303	1336	39	34	100	A
MH0002.322	MH0019.C1467468_1	1293	1326	39	34	100	A
MH0002.322	MH0025.scaffold24481_12	1266	1299	39	34	100	A
MH0002.322	MH0042.scaffold19737_4	10517	10550	39	34	100	A
MH0002.322	MH0043.scaffold35755_2	2429	2396	39	34	100	A
MH0002.322	O2.UC-14.C3040849_1	115	148	39	34	91.18	A
MH0002.322	O2.UC-21.scaffold62673_1	3046	3079	39	34	97.06	A
MH0002.322	O2.UC-23.scaffold37401_8	610	577	39	34	100	A
MH0002.322	V1.UC-14.scaffold51526_3	1032	999	39	34	100	A
MH0002.323	MH0007.C1982834_1	111	89	39	23	100	N
MH0002.323	MH0059.scaffold98_3	2341	2319	39	23	100	N
MH0002.324	MH0008.scaffold52956_1	4564	4535	39	30	100	N
MH0002.324	MH0010.scaffold39147_1	1875	1846	39	30	100	N
MH0002.324	MH0016.scaffold1917_4	1130	1159	39	30	100	N
MH0002.324	MH0018.scaffold12809_1	514	485	39	30	100	N
MH0002.324	MH0028.scaffold67932_1	478	449	39	30	100	N
MH0002.324	MH0031.C4177258_1	623	656	39	34	100	A
MH0002.324	MH0033.C3717333_1	301	272	39	30	100	N
MH0002.324	MH0036.scaffold77494_2	411	378	39	34	100	A
MH0002.324	MH0039.scaffold20771_1	628	595	39	34	97.06	A
MH0002.324	MH0041.scaffold86617_1	1080	1113	39	34	100	A
MH0002.324	MH0055.scaffold21209_1	308	279	39	30	100	N
MH0002.324	MH0056.scaffold2972_6	117	88	39	30	100	N
MH0002.324	MH0058.C4193949_1	751	718	39	34	100	A
MH0002.324	MH0059.scaffold20346_2	820	853	39	34	100	A
MH0002.324	MH0059.scaffold22515_1	39	6	39	34	97.06	A
MH0002.324	MH0073.C3704023_1	348	381	39	34	97.06	A
MH0002.324	MH0081.scaffold98573_1	1720	1749	39	30	100	N
MH0002.324	MH0083.scaffold43056_2	935	968	39	34	100	A
MH0002.324	O2.UC-12.scaffold25076_9	582	615	39	34	100	A
MH0002.324	O2.UC-14.scaffold2945_4	39	6	39	34	97.06	A
MH0002.324	V1.CD-6.scaffold73856_2	966	999	39	34	97.06	A
MH0002.324	V1.UC-19.scaffold20285_1	1727	1699	39	29	96.55	N
MH0002.324	V1.UC-6.scaffold38534_1	637	666	39	30	100	N
MH0002.324	V1.UC-7.scaffold47216_2	4586	4615	39	30	100	N
MH0002.324	V1.UC-9.scaffold35102_1	381	410	39	30	100	N
MH0002.325	MH0015.scaffold15283_6	99	78	39	22	100	N
MH0002.325	MH0039.scaffold63269_1	133	109	39	25	100	N
MH0002.325	MH0073.scaffold84902_2	1406	1433	39	28	96.43	N
MH0002.325	MH0084.scaffold47262_1	115	94	39	22	100	N
MH0002.325	O2.UC-13.scaffold48380_2	339	308	39	32	96.88	N
MH0002.325	V1.UC-18.scaffold12733_1	2171	2138	39	34	97.06	A
MH0002.325	V1.UC-19.scaffold81799_1	579	546	39	34	100	A
MH0002.328	MH0079.scaffold7485_6	802	827	38	26	96.15	N
MH0002.329	MH0019.C1463244_1	979	945	38	35	94.29	A
MH0002.332	MH0006.scaffold8770_1	1178	1206	38	29	96.55	N
MH0002.332	MH0028.scaffold22946_1	683	655	38	29	96.55	N
MH0002.332	MH0038.scaffold17466_2	83	117	38	35	100	A
MH0002.332	MH0039.scaffold6869_3	732	698	38	35	100	A
MH0002.332	MH0070.scaffold108970_1	112	140	38	29	96.55	N
MH0002.333	MH0007.C1981834_1	2214	2249	38	36	91.67	A
MH0002.333	MH0011.scaffold21459_1	117	152	38	36	100	A
MH0002.333	MH0040.C3911772_1	24	59	38	36	91.67	A
MH0002.333	MH0048.scaffold67636_1	219	254	38	36	91.67	A
MH0002.333	MH0051.C2132301_1	1033	998	38	36	100	A
MH0002.333	MH0058.scaffold68631_2	978	943	38	36	91.67	A
MH0002.333	MH0063.scaffold5511_2	494	459	38	36	91.67	A
MH0002.333	MH0071.scaffold450_4	451	486	38	36	100	A
MH0002.333	MH0074.scaffold10958_5	977	942	38	36	91.67	A
MH0002.333	MH0081.scaffold96592_1	27	62	38	36	91.67	A
MH0002.333	O2.UC-1.scaffold6237_1	2291	2256	38	36	91.67	A
MH0002.333	O2.UC-23.scaffold13005_5	1608	1573	38	36	91.67	A
MH0002.333	V1.CD-4.scaffold24314_4	8454	8419	38	36	91.67	A
MH0002.333	V1.UC-17.scaffold9574_2	202	237	38	36	91.67	A
MH0002.334	MH0003.scaffold29645_2	1350	1384	38	35	91.43	A
MH0002.334	MH0059.scaffold29356_1	128	162	38	35	91.43	A
MH0002.334	V1.UC-10.scaffold18929_1	4371	4405	38	35	91.43	A
MH0002.335	MH0002.scaffold31154_1	1059	1094	38	36	100	A
MH0002.335	MH0006.scaffold171928_1	1811	1776	38	36	97.22	A
MH0002.335	MH0012.scaffold6928_10	1009	974	38	36	100	A
MH0002.335	MH0013.scaffold36099_1	3245	3280	38	36	97.22	A
MH0002.335	MH0014.scaffold89989_1	794	759	38	36	97.22	A
MH0002.335	MH0020.scaffold41425_1	394	359	38	36	100	A
MH0002.335	MH0025.scaffold6793_1	399	434	38	36	97.22	A
MH0002.335	MH0031.scaffold16860_3	58	23	38	36	97.22	A
MH0002.335	MH0035.scaffold49962_5	875	910	38	36	97.22	A
MH0002.335	MH0036.scaffold3368_6	1508	1473	38	36	97.22	A
MH0002.335	MH0039.scaffold22804_9	425	390	38	36	97.22	A
MH0002.335	MH0043.scaffold47483_12	467	432	38	36	100	A
MH0002.335	MH0055.scaffold61003_1	847	881	38	35	100	A
MH0002.335	MH0059.scaffold17424_1	1496	1461	38	36	100	A
MH0002.335	MH0062.scaffold35047_1	1549	1584	38	36	97.22	A
MH0002.335	MH0069.scaffold18192_2	375	410	38	36	97.22	A
MH0002.335	MH0080.C3325362_1	2310	2275	38	36	94.44	A
MH0002.335	MH0081.scaffold15479_3	522	557	38	36	100	A
MH0002.335	MH0083.scaffold10421_5	5160	5125	38	36	97.22	A
MH0002.335	V1.CD-13.scaffold15581_3	1058	1093	38	36	100	A
MH0002.335	V1.UC-18.scaffold66354_1	163	198	38	36	97.22	A
MH0002.335	V1.UC-6.scaffold9175_6	27	62	38	36	97.22	A
MH0002.336	MH0070.scaffold41858_1	7598	7565	38	34	97.06	A
MH0002.336	V1.UC-19.scaffold11105_4	1474	1441	38	34	97.06	A
MH0002.339	MH0006.scaffold280677_1	2972	3003	37	32	100	A
MH0002.339	MH0008.C1722148_1	144	111	37	34	100	A
MH0002.339	MH0028.scaffold33275_1	118	151	37	34	100	A
MH0002.339	MH0036.scaffold77494_3	1401	1368	37	34	100	A
MH0002.339	MH0037.scaffold72970_1	9	40	37	32	100	A
MH0002.339	MH0038.scaffold393_1	254	223	37	32	100	A
MH0002.339	MH0050.scaffold70512_1	351	384	37	34	100	A
MH0002.339	MH0059.scaffold98_4	234	203	37	32	100	A
MH0002.339	MH0073.C3745606_1	1244	1211	37	34	100	A
MH0002.339	O2.UC-13.scaffold51468_1	495	462	37	34	100	A
MH0002.339	V1.UC-10.scaffold95584_1	1576	1609	37	34	100	A
MH0002.339	V1.UC-18.scaffold35335_1	649	618	37	32	100	A
MH0002.339	V1.UC-19.scaffold89065_2	2581	2550	37	32	100	A
MH0002.339	V1.UC-6.scaffold86633_1	552	519	37	34	100	A
MH0002.339	V1.UC-9.scaffold87952_1	1254	1287	37	34	100	A
MH0002.34	MH0015.scaffold15283_6	78	99	35	22	100	N
MH0002.34	MH0039.scaffold63269_1	109	133	35	25	100	N
MH0002.34	MH0064.scaffold15164_5	857	836	35	22	100	N
MH0002.34	MH0067.scaffold11029_1	8963	8942	35	22	100	N
MH0002.34	MH0073.scaffold84902_2	1433	1406	35	28	96.43	N
MH0002.34	MH0084.scaffold47262_1	94	115	35	22	100	N
MH0002.34	O2.UC-13.scaffold48380_2	308	339	35	32	96.88	A
MH0002.34	V1.UC-18.scaffold12733_1	2138	2172	35	35	97.14	A
MH0002.34	V1.UC-19.scaffold81799_1	546	580	35	35	100	Y
MH0002.340	MH0007.C1951813_1	416	390	37	27	96.3	N
MH0002.340	MH0009.scaffold32032_1	527	553	37	27	96.3	N
MH0002.340	MH0010.scaffold36924_2	16142	16168	37	27	96.3	N
MH0002.340	MH0011.scaffold15315_1	635	661	37	27	96.3	N
MH0002.340	MH0011.scaffold3519_4	480	514	37	35	100	A
MH0002.340	MH0013.scaffold50569_1	2016	2042	37	27	96.3	N
MH0002.340	MH0016.scaffold83788_1	92	126	37	35	97.14	A
MH0002.340	MH0017.scaffold5183_12	2117	2143	37	27	96.3	N
MH0002.340	MH0020.scaffold13913_1	195	221	37	27	96.3	N
MH0002.340	MH0023.scaffold16103_1	780	806	37	27	96.3	N
MH0002.340	MH0030.scaffold22304_2	2255	2281	37	27	96.3	N
MH0002.340	MH0031.scaffold11549_2	621	647	37	27	96.3	N
MH0002.340	MH0035.scaffold53387_3	500	474	37	27	96.3	N
MH0002.340	MH0039.scaffold8818_3	312	278	37	35	100	A
MH0002.340	MH0040.scaffold21657_2	595	621	37	27	96.3	N
MH0002.340	MH0042.scaffold1866_7	831	805	37	27	96.3	N
MH0002.340	MH0043.scaffold3937_12	222	248	37	27	96.3	N
MH0002.340	MH0046.scaffold1946_5	2023	2049	37	27	96.3	N
MH0002.340	MH0048.scaffold36582_1	1674	1648	37	27	96.3	N
MH0002.340	MH0049.C2308213_1	125	151	37	27	96.3	N
MH0002.340	MH0051.C2077042_1	515	549	37	35	100	A
MH0002.340	MH0052.scaffold62454_1	515	541	37	27	96.3	N
MH0002.340	MH0053.scaffold1485_1	1018	1044	37	27	96.3	N
MH0002.340	MH0054.scaffold24141_7	466	492	37	27	96.3	N
MH0002.340	MH0057.scaffold4401_2	2085	2059	37	27	96.3	N
MH0002.340	MH0058.scaffold99230_2	4267	4241	37	27	96.3	N
MH0002.340	MH0059.scaffold11386_18	492	466	37	27	96.3	N
MH0002.340	MH0060.scaffold6234_2	725	699	37	27	96.3	N
MH0002.340	MH0063.scaffold5511_1	1346	1320	37	27	96.3	N
MH0002.340	MH0065.scaffold63881_2	84	58	37	27	96.3	N
MH0002.340	MH0067.scaffold540_7	12660	12634	37	27	96.3	N
MH0002.340	MH0068.scaffold3564_2	409	435	37	27	96.3	N
MH0002.340	MH0070.scaffold55104_1	1439	1465	37	27	96.3	N
MH0002.340	MH0071.scaffold27046_1	891	917	37	27	96.3	N
MH0002.340	MH0074.scaffold37920_1	320	346	37	27	96.3	N
MH0002.340	MH0075.scaffold7726_1	299	265	37	35	100	A
MH0002.340	MH0077.scaffold45663_1	644	670	37	27	96.3	N
MH0002.340	MH0081.scaffold10832_4	9333	9307	37	27	96.3	N
MH0002.340	O2.UC-1.scaffold2312_1	584	610	37	27	96.3	N
MH0002.340	O2.UC-23.scaffold13005_3	1054	1028	37	27	96.3	N
MH0002.340	O2.UC-24.scaffold3413_1	1109	1075	37	35	100	A
MH0002.340	V1.CD-4.scaffold24314_4	5328	5302	37	27	96.3	N
MH0002.340	V1.CD-8.scaffold22128_1	9371	9345	37	27	96.3	N
MH0002.340	V1.CD-9.scaffold21972_1	5285	5251	37	35	100	A
MH0002.340	V1.UC-17.C9473580_1	306	280	37	27	96.3	N
MH0002.340	V1.UC-19.scaffold4883_8	878	852	37	27	96.3	N
MH0002.341	MH0061.scaffold21645_5	2511	2486	37	26	96.15	N
MH0002.341	V1.CD-3.scaffold41468_1	8237	8266	37	30	93.33	N
MH0002.342	MH0057.scaffold38597_2	4961	4926	37	36	97.22	A
MH0002.345	MH0059.scaffold17424_1	573	545	36	29	96.55	N
MH0002.345	MH0066.scaffold61696_3	663	688	36	26	96.15	N
MH0002.348	MH0003.scaffold51633_2	938	971	36	34	100	A
MH0002.348	O2.UC-12.C3465060_1	181	202	36	22	100	N
MH0002.349	MH0006.scaffold27005_5	876	841	36	36	100	Y
MH0002.349	MH0028.scaffold25459_3	496	461	36	36	91.67	A
MH0002.349	MH0060.scaffold52180_3	375	410	36	36	91.67	A
MH0002.349	MH0062.scaffold87520_2	558	523	36	36	100	Y
MH0002.349	V1.CD-4.scaffold17511_3	2782	2747	36	36	91.67	A
MH0002.349	V1.UC-13.scaffold18316_3	49909	49874	36	36	91.67	A
MH0002.349	V1.UC-9.scaffold44250_3	1960	1925	36	36	91.67	A
MH0002.35	MH0022.C1722161_1	485	451	35	35	100	Y
MH0002.350	MH0002.scaffold1973_1	23	1	36	23	100	N
MH0002.350	MH0025.scaffold100422_1	79	113	36	35	94.29	A
MH0002.350	MH0036.scaffold67524_1	288	255	36	34	97.06	A
MH0002.350	MH0041.scaffold7356_1	79	112	36	34	97.06	A
MH0002.350	MH0046.scaffold17613_2	1914	1881	36	34	97.06	A
MH0002.350	MH0055.scaffold22108_1	237	204	36	34	97.06	A
MH0002.350	MH0084.scaffold35431_3	530	563	36	34	97.06	A
MH0002.350	MH0085.scaffold31661_2	365	390	36	26	96.15	N
MH0002.354	MH0037.scaffold55499_3	77	44	36	34	100	A
MH0002.354	MH0055.scaffold38308_4	669	702	36	34	100	A
MH0002.356	MH0002.scaffold27093_2	485	518	36	34	100	A
MH0002.356	MH0051.scaffold10748_1	444	477	36	34	94.12	A
MH0002.356	MH0065.scaffold41346_1	285	318	36	34	94.12	A
MH0002.356	MH0066.scaffold29687_1	696	663	36	34	94.12	A
MH0002.356	MH0069.scaffold1532_1	285	318	36	34	94.12	A
MH0002.356	O2.UC-24.scaffold65124_1	285	318	36	34	94.12	A
MH0002.356	V1.CD-9.scaffold21972_1	524	492	36	33	93.94	A
MH0002.358	V1.CD-6.scaffold77808_1	3308	3273	36	36	94.44	A
MH0002.363	unmapped_K23_L70.scaffold499776_2	227	194	35	34	100	A
MH0002.365	MH0006.scaffold150116_1	1509	1476	35	34	100	A
MH0002.365	MH0021.scaffold70945_2	422	389	35	34	100	A
MH0002.365	MH0035.scaffold31959_3	770	737	35	34	100	A
MH0002.365	MH0063.scaffold76420_3	437	404	35	34	100	A
MH0002.365	MH0082.scaffold14726_8	1550	1517	35	34	100	A
MH0002.365	MH0086.scaffold21565_22	648	681	35	34	100	A
MH0002.365	V1.CD-3.scaffold21519_2	754	721	35	34	100	A
MH0002.365	V1.CD-4.scaffold60115_7	900	933	35	34	100	A
MH0002.365	V1.UC-10.scaffold32409_3	286	253	35	34	100	A
MH0002.365	V1.UC-21.scaffold22026_9	2467	2500	35	34	100	A
MH0002.365	V1.UC-7.scaffold4461_2	29009	29042	35	34	100	A
MH0002.369	MH0002.scaffold7544_4	4073	4106	35	34	100	A
MH0002.369	MH0003.scaffold60001_2	4073	4106	35	34	100	A
MH0002.369	MH0006.scaffold319451_1	546	513	35	34	100	A
MH0002.369	MH0008.C1728584_1	4099	4132	35	34	100	A
MH0002.369	MH0009.scaffold15090_16	2137	2104	35	34	100	A
MH0002.369	MH0010.C1306204_1	752	719	35	34	100	A
MH0002.369	MH0011.scaffold2228_6	26332	26365	35	34	100	A
MH0002.369	MH0012.C18680905_1	532	499	35	34	100	A
MH0002.369	MH0014.scaffold88933_1	1358	1325	35	34	100	A
MH0002.369	MH0015.scaffold9058_5	481	448	35	34	100	A
MH0002.369	MH0016.scaffold2088_1	875	842	35	34	100	A
MH0002.369	MH0018.scaffold3281_6	3337	3304	35	34	100	A
MH0002.369	MH0019.C1464048_1	1241	1274	35	34	100	A
MH0002.369	MH0021.scaffold71644_1	3028	2995	35	34	100	A
MH0002.369	MH0025.C3644138_1	601	568	35	34	100	A
MH0002.369	MH0026.scaffold4684_1	11009	11042	35	34	100	A
MH0002.369	MH0027.scaffold59493_2	424	391	35	34	100	A
MH0002.369	MH0028.scaffold8970_5	661	628	35	34	100	A
MH0002.369	MH0032.scaffold4808_5	860	827	35	34	100	A
MH0002.369	MH0033.C3750384_1	754	721	35	34	100	A
MH0002.369	MH0034.scaffold4886_22	3570	3603	35	34	100	A
MH0002.369	MH0035.C4109815_1	684	651	35	34	100	A
MH0002.369	MH0036.C3600289_1	394	427	35	34	100	A
MH0002.369	MH0037.scaffold77950_1	14593	14626	35	34	100	A
MH0002.369	MH0038.scaffold7854_2	2247	2214	35	34	100	A
MH0002.369	MH0040.scaffold82826_1	9874	9907	35	34	100	A
MH0002.369	MH0041.scaffold49980_1	3120	3153	35	34	100	A
MH0002.369	MH0042.scaffold49984_2	731	698	35	34	100	A
MH0002.369	MH0043.scaffold38554_3	842	809	35	34	100	A
MH0002.369	MH0044.scaffold19622_1	23	1	35	23	100	N
MH0002.369	MH0045.scaffold39784_2	492	459	35	34	100	A
MH0002.369	MH0046.scaffold42712_3	644	611	35	34	100	A
MH0002.369	MH0047.scaffold9692_3	429	396	35	34	97.06	A
MH0002.369	MH0048.scaffold22555_4	4465	4498	35	34	100	A
MH0002.369	MH0049.scaffold11745_1	4305	4272	35	34	100	A
MH0002.369	MH0050.scaffold32334_4	661	628	35	34	100	A
MH0002.369	MH0051.scaffold32671_1	9891	9924	35	34	100	A
MH0002.369	MH0055.scaffold944_4	842	809	35	34	100	A
MH0002.369	MH0056.scaffold146635_2	144	111	35	34	100	A
MH0002.369	MH0057.scaffold6753_5	5690	5723	35	34	100	A
MH0002.369	MH0058.scaffold103290_2	575	542	35	34	100	A
MH0002.369	MH0059.scaffold47078_4	661	628	35	34	100	A
MH0002.369	MH0060.scaffold5782_26	282	249	35	34	100	A
MH0002.369	MH0062.scaffold89948_1	28351	28384	35	34	100	A
MH0002.369	MH0063.scaffold74267_3	347	314	35	34	100	A
MH0002.369	MH0064.scaffold6620_10	4073	4106	35	34	100	A
MH0002.369	MH0065.scaffold1751_2	4248	4215	35	34	100	A
MH0002.369	MH0066.scaffold4679_1	114	81	35	34	100	A
MH0002.369	MH0067.scaffold6525_2	5609	5642	35	34	100	A
MH0002.369	MH0069.scaffold9792_6	4985	5018	35	34	100	A
MH0002.369	MH0070.scaffold775_3	653	620	35	34	100	A
MH0002.369	MH0071.scaffold9571_7	9545	9512	35	34	100	A
MH0002.369	MH0072.scaffold15262_2	159	126	35	34	100	A
MH0002.369	MH0073.scaffold6267_3	1311	1278	35	34	100	A
MH0002.369	MH0075.scaffold6469_5	4073	4106	35	34	100	A
MH0002.369	MH0076.C2881160_1	2816	2849	35	34	100	A
MH0002.369	MH0077.C4554845_1	1038	1005	35	34	100	A
MH0002.369	MH0080.scaffold72450_2	3920	3887	35	34	100	A
MH0002.369	MH0081.scaffold3603_2	661	628	35	34	100	A
MH0002.369	MH0082.scaffold84438_1	4322	4355	35	34	100	A
MH0002.369	MH0084.scaffold3967_4	4090	4057	35	34	100	A
MH0002.369	MH0085.scaffold1659_9	8871	8838	35	34	100	A
MH0002.369	MH0086.scaffold16519_1	3769	3736	35	34	100	A
MH0002.369	O2.UC-12.scaffold1624_2	6542	6509	35	34	100	A
MH0002.369	O2.UC-13.scaffold19687_3	4073	4106	35	34	100	A
MH0002.369	O2.UC-14.scaffold31821_2	661	628	35	34	100	A
MH0002.369	O2.UC-17.scaffold681_2	8992	9025	35	34	100	A
MH0002.369	O2.UC-19.scaffold13522_2	7610	7643	35	34	100	A
MH0002.369	O2.UC-20.scaffold4003_2	661	628	35	34	100	A
MH0002.369	O2.UC-21.scaffold6333_1	2142	2176	35	35	100	Y
MH0002.369	O2.UC-22.scaffold2683_1	2788	2821	35	34	100	A
MH0002.369	O2.UC-23.scaffold14539_4	360	393	35	34	100	A
MH0002.369	O2.UC-4.scaffold43887_1	3384	3351	35	34	100	A
MH0002.369	V1.CD-11.scaffold6331_1	684	651	35	34	100	A
MH0002.369	V1.CD-14.scaffold33121_2	661	628	35	34	100	A
MH0002.369	V1.CD-15.scaffold11118_4	4073	4106	35	34	100	A
MH0002.369	V1.CD-3.scaffold1837_10	4073	4106	35	34	100	A
MH0002.369	V1.CD-4.scaffold91185_1	1334	1301	35	34	100	A
MH0002.369	V1.CD-6.scaffold29373_5	2099	2132	35	34	100	A
MH0002.369	V1.CD-8.scaffold90089_2	1242	1209	35	34	100	A
MH0002.369	V1.CD-9.scaffold76135_2	1335	1302	35	34	100	A
MH0002.369	V1.UC-10.scaffold95324_1	786	819	35	34	100	A
MH0002.369	V1.UC-14.scaffold9839_3	4469	4502	35	34	100	A
MH0002.369	V1.UC-17.scaffold4402_8	385	418	35	34	100	A
MH0002.369	V1.UC-18.scaffold69873_1	9759	9792	35	34	100	A
MH0002.369	V1.UC-19.scaffold14681_3	4304	4337	35	34	100	A
MH0002.369	V1.UC-21.scaffold41909_2	4292	4325	35	34	100	A
MH0002.369	V1.UC-6.scaffold56479_3	578	545	35	34	100	A
MH0002.369	V1.UC-7.scaffold48924_1	1026	993	35	34	100	A
MH0002.369	V1.UC-9.scaffold14224_1	7080	7047	35	34	100	A
MH0002.37	MH0011.C5426580_1	1471	1438	35	34	97.06	A
MH0002.373	MH0012.scaffold25621_1	4449	4415	35	35	100	Y
MH0002.373	MH0013.scaffold10161_2	1858	1886	35	29	100	N
MH0002.373	MH0035.scaffold12484_7	940	908	35	33	96.97	A
MH0002.373	MH0050.scaffold39868_2	304	276	35	29	96.55	N
MH0002.374	MH0032.scaffold17190_6	918	952	35	35	97.14	A
MH0002.374	MH0070.C4525069_1	146	180	35	35	97.14	A
MH0002.375	O2.UC-19.C3594121_1	518	486	35	33	96.97	A
MH0002.376	V1.UC-18.scaffold35335_2	5940	5974	35	35	100	Y
MH0002.38	MH0006.scaffold8770_1	1204	1178	34	27	96.3	N
MH0002.38	MH0028.scaffold22946_1	657	683	34	27	96.3	N
MH0002.38	MH0038.scaffold17466_2	115	82	34	34	100	Y
MH0002.38	MH0039.scaffold6869_3	700	733	34	34	100	Y
MH0002.38	MH0070.scaffold108970_1	138	112	34	27	96.3	N
MH0002.380	MH0050.scaffold92392_2	14164	14191	35	28	96.43	N
MH0002.380	MH0066.scaffold20920_1	380	414	35	35	97.14	A
MH0002.380	V1.UC-21.scaffold58257_2	78	112	35	35	94.29	A
MH0002.382	MH0003.scaffold64779_1	1182	1215	35	34	97.06	A
MH0002.382	MH0004.scaffold47657_1	1452	1419	35	34	100	A
MH0002.382	MH0009.scaffold4863_1	1189	1156	35	34	100	A
MH0002.382	MH0011.scaffold108917_1	819	852	35	34	100	A
MH0002.382	MH0014.scaffold36753_2	504	537	35	34	100	A
MH0002.382	MH0017.C1490551_1	525	558	35	34	100	A
MH0002.382	MH0022.scaffold48010_1	777	810	35	34	100	A
MH0002.382	MH0030.C3973869_1	1739	1706	35	34	100	A
MH0002.382	MH0036.C3707475_1	1361	1328	35	34	100	A
MH0002.382	MH0037.C3893140_1	1548	1515	35	34	100	A
MH0002.382	MH0040.scaffold102639_1	933	966	35	34	100	A
MH0002.382	MH0042.scaffold102849_1	187	154	35	34	100	A
MH0002.382	MH0050.C3888187_1	122	155	35	34	100	A
MH0002.382	MH0051.scaffold57427_1	2128	2095	35	34	100	A
MH0002.382	MH0054.scaffold32301_1	1862	1829	35	34	97.06	A
MH0002.382	MH0059.C3392931_1	849	816	35	34	100	A
MH0002.382	MH0060.scaffold64721_1	1536	1557	35	22	100	N
MH0002.382	MH0063.C4949003_1	527	560	35	34	100	A
MH0002.382	MH0065.C4695326_1	1745	1712	35	34	100	A
MH0002.382	MH0070.scaffold4338_3	504	537	35	34	100	A
MH0002.382	MH0075.scaffold25998_1	281	314	35	34	100	A
MH0002.382	MH0076.C2875494_1	1716	1683	35	34	100	A
MH0002.382	MH0077.scaffold52147_2	1255	1222	35	34	100	A
MH0002.382	MH0079.scaffold53729_1	318	351	35	34	100	A
MH0002.382	O2.UC-24.scaffold66873_2	1251	1218	35	34	100	A
MH0002.382	V1.CD-13.scaffold93626_2	1640	1607	35	34	94.12	A
MH0002.382	V1.CD-14.scaffold8747_1	501	534	35	34	100	A
MH0002.382	V1.UC-6.C4325726_1	293	326	35	34	100	A
MH0002.387	MH0003.scaffold78072_1	1045	1075	35	31	100	A
MH0002.387	MH0019.C1467800_1	3844	3811	35	34	100	A
MH0002.387	MH0025.scaffold31735_1	1	31	35	31	100	A
MH0002.387	MH0026.scaffold34326_10	422	452	35	31	100	A
MH0002.387	MH0032.scaffold29253_6	903	933	35	31	100	A
MH0002.387	MH0039.scaffold2260_1	3908	3875	35	34	100	A
MH0002.387	MH0043.scaffold80706_1	3216	3183	35	34	100	A
MH0002.387	MH0069.scaffold41170_3	711	681	35	31	100	A
MH0002.387	MH0081.C3760227_1	3859	3826	35	34	100	A
MH0002.387	MH0083.scaffold1734_1	2909	2936	35	28	100	N
MH0002.387	O2.UC-13.scaffold32803_1	361	334	35	28	100	N
MH0002.387	O2.UC-17.scaffold8143_3	4854	4884	35	31	96.77	A
MH0002.387	V1.CD-4.scaffold1659_1	364	337	35	28	100	N
MH0002.387	V1.UC-13.C5310844_1	414	386	35	29	96.55	N
MH0002.387	V1.UC-19.scaffold10691_2	8936	8963	35	28	100	N
MH0002.387	V1.UC-6.scaffold94324_1	627	603	35	25	100	N
MH0002.388	MH0071.scaffold20609_4	3890	3922	35	33	100	A
MH0002.390	MH0023.scaffold27080_5	195	227	35	33	96.97	A
MH0002.390	MH0054.scaffold22312_1	451	419	35	33	96.97	A
MH0002.390	MH0062.scaffold48720_2	11865	11896	35	32	96.88	A
MH0002.390	MH0071.scaffold943_4	2179	2211	35	33	96.97	A
MH0002.390	MH0075.scaffold61189_1	9278	9310	35	33	93.94	A
MH0002.390	O2.UC-19.scaffold17613_8	330	298	35	33	93.94	A
MH0002.390	O2.UC-22.scaffold3102_1	1886	1854	35	33	93.94	A
MH0002.393	MH0053.scaffold61052_12	546	580	35	35	100	Y
MH0002.393	MH0066.scaffold63063_2	681	647	35	35	100	Y
MH0002.4	MH0003.scaffold39547_2	30286	30260	33	27	100	N
MH0002.4	MH0010.C1326540_1	11392	11366	33	27	100	N
MH0002.4	MH0012.scaffold17168_2	1417	1443	33	27	100	N
MH0002.4	MH0015.C1737673_1	3461	3435	33	27	100	N
MH0002.4	MH0028.scaffold24740_4	1004	978	33	27	100	N
MH0002.4	MH0037.scaffold37846_5	6428	6406	33	23	100	N
MH0002.4	MH0039.scaffold4680_3	3413	3435	33	23	100	N
MH0002.4	MH0048.scaffold31758_1	528	554	33	27	100	N
MH0002.4	MH0051.C2074473_1	280	306	33	27	100	N
MH0002.4	MH0054.scaffold66010_1	1429	1403	33	27	100	N
MH0002.4	MH0059.scaffold87492_3	542	516	33	27	100	N
MH0002.4	MH0066.C3425258_1	910	936	33	27	100	N
MH0002.4	MH0085.scaffold37908_5	10978	11004	33	27	100	N
MH0002.4	MH0086.scaffold109528_3	6458	6484	33	27	100	N
MH0002.4	O2.UC-4.C3643456_1	1022	996	33	27	100	N
MH0002.4	V1.CD-4.C3664621_1	2122	2099	33	24	100	N
MH0002.4	V1.CD-9.scaffold79984_3	4614	4640	33	27	100	N
MH0002.400	MH0003.scaffold23146_1	1150	1116	35	35	100	Y
MH0002.400	MH0007.scaffold42224_10	1796	1830	35	35	100	Y
MH0002.400	MH0008.C1729266_1	10906	10872	35	35	100	Y
MH0002.400	MH0009.scaffold15187_8	408	442	35	35	100	Y
MH0002.400	MH0010.C1326460_1	8733	8767	35	35	97.14	A
MH0002.400	MH0011.scaffold56198_1	12451	12485	35	35	94.29	A
MH0002.400	MH0012.scaffold6718_1	17568	17602	35	35	94.29	A
MH0002.400	MH0013.scaffold51060_1	96	130	35	35	100	Y
MH0002.400	MH0014.scaffold56255_1	11683	11717	35	35	100	Y
MH0002.400	MH0016.scaffold6802_2	280	246	35	35	100	Y
MH0002.400	MH0017.C1493383_1	2069	2035	35	35	94.29	A
MH0002.400	MH0018.scaffold3412_2	10025	10059	35	35	94.29	A
MH0002.400	MH0019.C1466180_1	2145	2179	35	35	97.14	A
MH0002.400	MH0021.C2075527_1	1336	1302	35	35	100	Y
MH0002.400	MH0025.scaffold104774_1	43	15	35	29	96.55	N
MH0002.400	MH0026.scaffold9864_9	15670	15636	35	35	100	Y
MH0002.400	MH0033.scaffold113533_1	2147	2181	35	35	97.14	A
MH0002.400	MH0037.scaffold15106_1	6994	6960	35	35	97.14	A
MH0002.400	MH0038.scaffold56008_2	15515	15481	35	35	94.29	A
MH0002.400	MH0039.scaffold13945_1	652	618	35	35	94.29	A
MH0002.400	MH0040.scaffold83103_1	16964	16998	35	35	94.29	A
MH0002.400	MH0047.scaffold42677_1	356	322	35	35	97.14	A
MH0002.400	MH0049.scaffold32409_1	8736	8770	35	35	100	Y
MH0002.400	MH0051.scaffold51308_2	15606	15572	35	35	94.29	A
MH0002.400	MH0052.scaffold62597_3	145	179	35	35	94.29	A
MH0002.400	MH0056.scaffold36103_2	968	934	35	35	97.14	A
MH0002.400	MH0059.scaffold19783_2	485	451	35	35	100	Y
MH0002.400	MH0060.scaffold108941_2	462	496	35	35	97.14	A
MH0002.400	MH0062.C5437214_1	1991	1957	35	35	94.29	A
MH0002.400	MH0064.scaffold1878_2	27038	27072	35	35	94.29	A
MH0002.400	MH0065.scaffold79214_2	5542	5508	35	35	97.14	A
MH0002.400	MH0067.scaffold10212_7	14021	13987	35	35	94.29	A
MH0002.400	MH0069.scaffold9633_2	732	766	35	35	100	Y
MH0002.400	MH0070.scaffold107537_2	30	64	35	35	94.29	A
MH0002.400	MH0071.scaffold38862_1	12451	12485	35	35	94.29	A
MH0002.400	MH0073.C3687469_1	221	255	35	35	94.29	A
MH0002.400	MH0076.scaffold72604_1	2707	2741	35	35	100	Y
MH0002.400	MH0077.C4575175_1	6531	6565	35	35	94.29	A
MH0002.400	MH0079.scaffold16345_2	495	461	35	35	94.29	A
MH0002.400	MH0080.scaffold95907_1	226	192	35	35	100	Y
MH0002.400	MH0082.scaffold27962_1	1555	1521	35	35	94.29	A
MH0002.400	MH0083.scaffold7211_4	20605	20639	35	35	94.29	A
MH0002.400	MH0084.scaffold15156_2	671	637	35	35	100	Y
MH0002.400	MH0086.scaffold8377_1	20633	20667	35	35	94.29	A
MH0002.400	O2.UC-11.C4420668_1	399	365	35	35	100	Y
MH0002.400	O2.UC-13.scaffold802_1	991	957	35	35	100	Y
MH0002.400	O2.UC-14.scaffold14852_1	299	265	35	35	94.29	A
MH0002.400	O2.UC-17.scaffold702_4	7766	7732	35	35	100	Y
MH0002.400	O2.UC-23.scaffold9864_7	768	734	35	35	100	Y
MH0002.400	O2.UC-4.scaffold36196_1	3054	3020	35	35	94.29	A
MH0002.400	V1.CD-11.scaffold35042_1	53	87	35	35	94.29	A
MH0002.400	V1.CD-13.scaffold481_2	5190	5224	35	35	94.29	A
MH0002.400	V1.CD-3.scaffold46559_2	30	64	35	35	94.29	A
MH0002.400	V1.CD-4.scaffold95401_1	1991	1957	35	35	94.29	A
MH0002.400	V1.CD-8.scaffold119236_1	1408	1374	35	35	100	Y
MH0002.400	V1.CD-9.scaffold2225_4	168	202	35	35	97.14	A
MH0002.400	V1.UC-13.scaffold67317_1	1687	1653	35	35	100	Y
MH0002.400	V1.UC-18.scaffold1503_1	12869	12903	35	35	97.14	A
MH0002.400	V1.UC-19.scaffold157_2	2205	2171	35	35	94.29	A
MH0002.400	V1.UC-7.scaffold40804_2	4020	3986	35	35	97.14	A
MH0002.400	V1.UC-8.scaffold30819_1	7405	7371	35	35	94.29	A
MH0002.400	V1.UC-9.scaffold34064_1	7561	7527	35	35	100	Y
MH0002.401	MH0021.C2090061_1	804	835	35	32	100	A
MH0002.401	MH0022.C1734092_1	463	494	35	32	100	A
MH0002.403	unmapped_K23_L70.C219744784_1	1	29	34	29	100	A
MH0002.406	MH0021.scaffold71673_1	618	589	34	30	100	A
MH0002.406	MH0022.C1739854_1	264	293	34	30	100	A
MH0002.407	MH0025.scaffold22902_1	502	534	34	33	96.97	A
MH0002.407	unmapped_K23_L70.C219932836_1	97	71	34	27	96.3	N
MH0002.410	unmapped_K23_L70.scaffold572904_1	618	650	34	33	100	A
MH0002.415	MH0026.scaffold37729_6	59	92	34	34	100	Y
MH0002.415	MH0031.scaffold39181_10	4761	4794	34	34	100	Y
MH0002.415	V1.UC-8.scaffold67005_5	7098	7065	34	34	97.06	A
MH0002.415	unmapped_K23_L70.scaffold267324_1	295	328	34	34	100	Y
MH0002.417	MH0037.scaffold10368_1	6726	6755	34	30	96.67	A
MH0002.417	MH0042.scaffold9149_14	452	481	34	30	96.67	A
MH0002.417	MH0043.scaffold2717_4	1665	1694	34	30	96.67	A
MH0002.417	MH0066.scaffold957_3	1665	1694	34	30	96.67	A
MH0002.419	MH0007.C1983450_1	12225	12258	34	34	97.06	A
MH0002.419	MH0059.scaffold98_1	1758	1725	34	34	100	Y
MH0002.419	V1.UC-14.scaffold70192_1	36	3	34	34	97.06	A
MH0002.419	V1.UC-19.scaffold27661_1	985	952	34	34	100	Y
MH0002.42	V1.CD-15.scaffold23874_3	1172	1137	36	36	100	Y
MH0002.420	MH0012.scaffold53937_2	430	398	34	33	100	A
MH0002.420	V1.CD-15.scaffold30527_2	1091	1059	34	33	100	A
MH0002.420	V1.UC-14.scaffold9813_5	1418	1386	34	33	100	A
MH0002.420	V1.UC-15.scaffold2496_4	6772	6804	34	33	100	A
MH0002.420	V1.UC-18.scaffold54015_2	703	673	34	31	100	A
MH0002.421	MH0006.scaffold144779_1	4990	5012	34	23	100	N
MH0002.421	MH0011.scaffold32907_4	18983	18961	34	23	100	N
MH0002.421	MH0022.scaffold9075_1	548	570	34	23	100	N
MH0002.421	MH0024.scaffold41394_7	204	182	34	23	100	N
MH0002.421	MH0025.scaffold19840_1	2139	2117	34	23	100	N
MH0002.421	MH0031.scaffold20807_3	3973	3951	34	23	100	N
MH0002.421	MH0035.scaffold51011_4	1113	1091	34	23	100	N
MH0002.421	MH0043.scaffold6103_10	166	144	34	23	100	N
MH0002.421	MH0050.scaffold14152_3	6813	6791	34	23	100	N
MH0002.421	MH0052.scaffold61182_1	330	308	34	23	100	N
MH0002.421	MH0053.scaffold90078_8	226	248	34	23	100	N
MH0002.421	MH0056.scaffold2895_13	319	297	34	23	100	N
MH0002.421	MH0060.scaffold4136_7	456	434	34	23	100	N
MH0002.421	MH0065.scaffold69245_4	317	339	34	23	100	N
MH0002.421	MH0069.scaffold14506_2	5647	5669	34	23	100	N
MH0002.421	MH0080.C3231527_1	402	380	34	23	100	N
MH0002.421	O2.UC-1.scaffold11450_2	5593	5615	34	23	100	N
MH0002.421	O2.UC-21.scaffold2003_5	538	516	34	23	100	N
MH0002.421	V1.CD-13.scaffold36743_2	9005	9027	34	23	100	N
MH0002.422	MH0022.C1729018_1	274	307	34	34	100	Y
MH0002.423	MH0006.scaffold142561_2	62	88	34	27	100	N
MH0002.426	MH0002.scaffold33362_4	3794	3762	34	33	100	A
MH0002.426	MH0004.scaffold38545_6	82	114	34	33	100	A
MH0002.426	MH0009.scaffold2785_2	2158	2126	34	33	100	A
MH0002.426	MH0014.scaffold21166_5	4240	4208	34	33	100	A
MH0002.426	MH0016.scaffold87125_2	111	142	34	32	93.75	A
MH0002.426	MH0022.scaffold14548_2	96	128	34	33	100	A
MH0002.426	MH0030.scaffold71245_3	878	846	34	33	100	A
MH0002.426	MH0031.scaffold13020_4	758	729	34	30	100	A
MH0002.426	MH0038.scaffold72811_1	1930	1901	34	30	100	A
MH0002.426	MH0043.C4728027_1	1169	1140	34	30	100	A
MH0002.426	MH0044.scaffold32271_2	697	729	34	33	100	A
MH0002.426	MH0049.C2339423_1	334	366	34	33	100	A
MH0002.426	MH0050.scaffold5063_2	2917	2949	34	33	100	A
MH0002.426	MH0053.scaffold413_14	1411	1379	34	33	100	A
MH0002.426	MH0054.scaffold28151_3	186	154	34	33	100	A
MH0002.426	MH0055.scaffold71835_2	222	254	34	33	100	A
MH0002.426	MH0056.scaffold7277_5	4599	4631	34	33	100	A
MH0002.426	MH0059.scaffold1461_1	58	90	34	33	100	A
MH0002.426	MH0070.scaffold12760_2	804	772	34	33	100	A
MH0002.426	MH0072.scaffold16383_3	321	353	34	33	96.97	A
MH0002.426	MH0072.scaffold23920_1	1689	1721	34	33	100	A
MH0002.426	MH0082.scaffold35127_1	23	55	34	33	100	A
MH0002.426	MH0083.scaffold41653_1	2137	2169	34	33	100	A
MH0002.426	MH0085.scaffold2727_1	1025	1057	34	33	100	A
MH0002.426	MH0086.scaffold10615_5	682	714	34	33	100	A
MH0002.426	O2.UC-24.scaffold43237_2	481	449	34	33	100	A
MH0002.426	V1.CD-9.scaffold24986_2	708	676	34	33	96.97	A
MH0002.426	V1.UC-18.scaffold8042_1	301	269	34	33	100	A
MH0002.427	V1.UC-15.scaffold29879_1	868	837	34	32	96.88	A
MH0002.428	MH0002.scaffold33362_4	3335	3303	34	33	96.97	A
MH0002.428	MH0004.scaffold38545_6	541	573	34	33	96.97	A
MH0002.428	MH0005.scaffold35976_2	184	216	34	33	96.97	A
MH0002.428	MH0009.scaffold2785_2	1699	1667	34	33	96.97	A
MH0002.428	MH0014.scaffold21166_5	3781	3749	34	33	96.97	A
MH0002.428	MH0017.scaffold38621_3	57	89	34	33	96.97	A
MH0002.428	MH0021.C2074469_1	187	219	34	33	96.97	A
MH0002.428	MH0030.scaffold71245_3	419	387	34	33	96.97	A
MH0002.428	MH0031.scaffold13020_4	302	270	34	33	96.97	A
MH0002.428	MH0034.scaffold3827_9	245	277	34	33	96.97	A
MH0002.428	MH0036.C3702955_1	82	114	34	33	96.97	A
MH0002.428	MH0037.scaffold38862_2	881	849	34	33	96.97	A
MH0002.428	MH0038.scaffold72811_1	1474	1442	34	33	96.97	A
MH0002.428	MH0040.scaffold49636_1	264	296	34	33	96.97	A
MH0002.428	MH0043.C4728027_1	713	681	34	33	96.97	A
MH0002.428	MH0044.scaffold32271_2	1156	1188	34	33	96.97	A
MH0002.428	MH0049.C2339423_1	793	825	34	33	96.97	A
MH0002.428	MH0051.scaffold7188_2	122	154	34	33	96.97	A
MH0002.428	MH0053.scaffold413_14	952	920	34	33	96.97	A
MH0002.428	MH0056.scaffold7277_5	5058	5090	34	33	96.97	A
MH0002.428	MH0059.scaffold1461_1	517	549	34	33	96.97	A
MH0002.428	MH0060.scaffold52546_2	302	270	34	33	96.97	A
MH0002.428	MH0065.scaffold86914_1	784	752	34	33	96.97	A
MH0002.428	MH0066.scaffold34512_1	264	296	34	33	96.97	A
MH0002.428	MH0070.scaffold12760_2	345	313	34	33	96.97	A
MH0002.428	MH0073.scaffold80306_1	283	315	34	33	96.97	A
MH0002.428	MH0074.scaffold413_9	323	355	34	33	96.97	A
MH0002.428	MH0076.C2831252_1	713	681	34	33	93.94	A
MH0002.428	MH0083.scaffold41653_2	241	273	34	33	96.97	A
MH0002.428	MH0085.scaffold2727_1	1484	1516	34	33	96.97	A
MH0002.428	MH0086.scaffold10615_5	1141	1173	34	33	96.97	A
MH0002.428	O2.UC-12.C3473626_1	417	449	34	33	96.97	A
MH0002.428	O2.UC-24.scaffold43237_2	22	1	34	22	100	N
MH0002.428	V1.UC-18.scaffold14183_4	3214	3182	34	33	96.97	A
MH0002.44	MH0007.C1982834_1	484	450	35	35	100	Y
MH0002.44	V1.UC-19.scaffold27661_5	5498	5471	35	28	100	N
MH0002.444	MH0025.scaffold99735_1	299	270	33	30	93.33	A
MH0002.444	MH0037.scaffold25376_2	1919	1948	33	30	93.33	A
MH0002.444	MH0055.scaffold60207_1	5624	5603	33	22	100	N
MH0002.446	MH0069.scaffold54593_3	23122	23154	33	33	100	Y
MH0002.446	O2.UC-13.scaffold21_4	4017	3985	33	33	93.94	A
MH0002.446	V1.CD-8.scaffold59519_8	336	304	33	33	96.97	A
MH0002.448	MH0025.scaffold42708_1	2717	2696	33	22	100	N
MH0002.448	MH0073.scaffold48247_2	820	841	33	22	100	N
MH0002.448	MH0079.C2078588_1	830	852	33	23	100	N
MH0002.448	O2.UC-14.scaffold909_2	1169	1148	33	22	100	N
MH0002.448	V1.CD-4.scaffold52072_1	1958	1979	33	22	100	N
MH0002.448	V1.UC-21.scaffold68095_2	768	747	33	22	100	N
MH0002.449	MH0038.scaffold29427_2	1633	1661	33	29	100	A
MH0002.449	MH0039.scaffold28303_2	61	89	33	29	100	A
MH0002.449	V1.UC-7.scaffold25925_1	1223	1195	33	29	100	A
MH0002.45	MH0038.scaffold29427_2	1665	1631	35	35	100	Y
MH0002.45	MH0039.scaffold28303_2	93	59	35	35	100	Y
MH0002.45	MH0050.scaffold43492_1	1501	1535	35	35	91.43	A
MH0002.45	MH0055.C3866203_1	87	53	35	35	94.29	A
MH0002.45	V1.CD-1.scaffold44228_1	499	465	35	35	91.43	A
MH0002.45	V1.CD-3.scaffold80050_1	2424	2458	35	35	91.43	A
MH0002.45	V1.UC-7.scaffold25925_1	1191	1225	35	35	100	Y
MH0002.459	MH0028.scaffold51232_3	275	301	33	27	100	N
MH0002.459	MH0038.scaffold16000_14	147	121	33	27	100	N
MH0002.459	MH0041.scaffold5395_5	2562	2588	33	27	96.3	N
MH0002.459	MH0045.scaffold34740_7	549	523	33	27	100	N
MH0002.459	MH0058.scaffold20690_6	252	278	33	27	96.3	N
MH0002.459	MH0059.scaffold42077_4	1384	1410	33	27	96.3	N
MH0002.459	MH0073.scaffold83279_2	782	808	33	27	96.3	N
MH0002.46	MH0014.scaffold8368_1	226	192	35	35	100	Y
MH0002.46	MH0018.scaffold16695_1	1336	1302	35	35	100	Y
MH0002.46	MH0019.C1467468_1	1326	1292	35	35	100	Y
MH0002.46	MH0025.scaffold24481_12	1299	1265	35	35	100	Y
MH0002.46	MH0041.scaffold19267_1	4047	4013	35	35	91.43	A
MH0002.46	MH0042.scaffold19737_4	10550	10516	35	35	100	Y
MH0002.46	MH0043.scaffold35755_2	2396	2430	35	35	100	Y
MH0002.46	O2.UC-14.C3040849_1	148	114	35	35	91.43	A
MH0002.46	O2.UC-21.scaffold62673_1	3079	3045	35	35	97.14	A
MH0002.46	O2.UC-23.scaffold37401_8	577	611	35	35	100	Y
MH0002.46	V1.UC-14.scaffold51526_3	999	1033	35	35	100	Y
MH0002.472	MH0014.scaffold8368_1	419	445	32	27	100	A
MH0002.472	MH0018.scaffold16695_1	1529	1555	32	27	96.3	A
MH0002.472	MH0019.C1467468_1	1519	1545	32	27	96.3	A
MH0002.472	MH0025.scaffold24481_12	1492	1518	32	27	96.3	A
MH0002.472	MH0041.scaffold19267_1	4241	4266	32	26	96.15	N
MH0002.472	MH0042.scaffold19737_4	10743	10769	32	27	96.3	A
MH0002.472	MH0043.scaffold35755_2	2203	2177	32	27	96.3	A
MH0002.472	MH0061.scaffold13553_3	3571	3546	32	26	96.15	N
MH0002.472	MH0072.scaffold69855_3	208	233	32	26	96.15	N
MH0002.472	O2.UC-12.scaffold4262_1	8	34	32	27	96.3	A
MH0002.472	O2.UC-14.C3040849_1	342	367	32	26	96.15	N
MH0002.472	O2.UC-21.scaffold62673_1	3272	3298	32	27	96.3	A
MH0002.472	O2.UC-23.scaffold37401_8	384	358	32	27	96.3	A
MH0002.472	V1.CD-11.scaffold67_8	6950	6925	32	26	96.15	N
MH0002.472	V1.CD-12.scaffold407_3	3475	3500	32	26	96.15	N
MH0002.472	V1.CD-4.scaffold41951_4	441	416	32	26	96.15	N
MH0002.472	V1.UC-14.scaffold51526_3	806	780	32	27	96.3	A
MH0002.479	O2.UC-23.scaffold30120_5	510	540	31	31	100	Y
MH0002.48	MH0014.scaffold8368_1	450	417	34	34	100	Y
MH0002.48	MH0018.scaffold16695_1	1560	1527	34	34	97.06	A
MH0002.48	MH0019.C1467468_1	1550	1517	34	34	97.06	A
MH0002.48	MH0025.scaffold24481_12	1523	1490	34	34	97.06	A
MH0002.48	MH0041.scaffold19267_1	4271	4241	34	31	96.77	A
MH0002.48	MH0042.scaffold19737_4	10774	10741	34	34	97.06	A
MH0002.48	MH0043.scaffold35755_2	2172	2205	34	34	97.06	A
MH0002.48	MH0061.scaffold13553_3	3541	3571	34	31	96.77	A
MH0002.48	MH0072.scaffold69855_3	238	208	34	31	96.77	A
MH0002.48	O2.UC-12.scaffold4262_1	39	6	34	34	97.06	A
MH0002.48	O2.UC-14.C3040849_1	372	342	34	31	96.77	A
MH0002.48	O2.UC-21.scaffold62673_1	3303	3270	34	34	97.06	A
MH0002.48	O2.UC-23.scaffold37401_8	353	386	34	34	97.06	A
MH0002.48	V1.CD-11.scaffold67_8	6920	6950	34	31	96.77	A
MH0002.48	V1.CD-12.scaffold407_3	3505	3475	34	31	96.77	A
MH0002.48	V1.CD-4.scaffold41951_4	411	441	34	31	96.77	A
MH0002.48	V1.UC-14.scaffold51526_3	775	808	34	34	97.06	A
MH0002.48	V1.UC-6.scaffold104859_3	948	918	34	31	96.77	A
MH0002.480	MH0023.scaffold27080_5	197	227	31	31	96.77	A
MH0002.480	MH0054.scaffold22312_1	449	419	31	31	96.77	A
MH0002.480	MH0062.scaffold48720_2	11867	11896	31	30	96.67	A
MH0002.480	MH0071.scaffold943_4	2181	2211	31	31	96.77	A
MH0002.480	MH0075.scaffold61189_1	9287	9310	31	24	100	N
MH0002.480	O2.UC-19.scaffold17613_8	321	298	31	24	100	N
MH0002.480	O2.UC-22.scaffold3102_1	1877	1854	31	24	100	N
MH0002.481	MH0040.scaffold76613_6	1694	1673	31	22	100	N
MH0002.484	MH0003.scaffold74095_1	833	806	31	28	96.43	A
MH0002.484	MH0028.scaffold8031_8	4785	4758	31	28	96.43	A
MH0002.484	MH0039.scaffold21727_3	787	766	31	22	100	N
MH0002.484	MH0042.scaffold78635_6	805	832	31	28	96.43	A
MH0002.484	MH0044.scaffold5320_2	6903	6876	31	28	96.43	A
MH0002.484	MH0058.scaffold20440_2	5675	5696	31	22	100	N
MH0002.484	O2.UC-19.scaffold399_2	1327	1300	31	28	96.43	A
MH0002.488	MH0001.scaffold21829_1	8334	8305	30	30	100	Y
[truncated: 114,602 more rows]
