# Supplementary material for: CRISPR targeting reveals a reservoir of common phages associated with the human gut microbiome
Source: HighWire-hosted journal article supplement (doi:10.1101/gr.138297.112), 2012-06-25
Supplement: Stern_DatasetS3.xlsx [file Stern_DatasetS3.xlsx]

## Sheet: contig2seed_final
MGE contig	Unique representative (seed)
MH0001.C779320_1	MH0057.scaffold10072_3
MH0001.C782934_1	MH0005.scaffold26242_1
MH0001.C783408_1	MH0031.scaffold47757_4
MH0001.C786082_1	MH0009.scaffold50205_2
MH0001.C787032_1	MH0076.scaffold56832_1
MH0001.C789245_1	MH0021.scaffold13755_1
MH0001.C789785_1	MH0031.scaffold47757_5
MH0001.C790411_1	MH0009.scaffold50205_2
MH0001.C791735_1	V1.UC-9.scaffold25356_1
MH0001.C792451_1	V1.CD-9.scaffold6814_1
MH0001.C792531_1	V1.CD-9.scaffold6217_8
MH0001.C796743_1	MH0001.C796743_1
MH0001.C797640_1	MH0001.C797640_1
MH0001.C798720_1	MH0018.scaffold29023_1
MH0001.C800880_1	MH0001.C800880_1
MH0001.C801108_1	MH0048.scaffold15048_1
MH0001.C801284_1	MH0047.scaffold3775_1
MH0001.scaffold10169_3	MH0072.scaffold532_1
MH0001.scaffold10369_10	MH0034.scaffold15675_2
MH0001.scaffold10369_18	MH0002.scaffold37810_2
MH0001.scaffold10369_7	MH0001.scaffold10369_7
MH0001.scaffold10369_9	MH0034.scaffold15675_2
MH0001.scaffold10449_4	MH0001.scaffold10449_4
MH0001.scaffold10538_1	MH0006.scaffold23003_3
MH0001.scaffold10980_1	MH0001.scaffold10980_1
MH0001.scaffold10980_2	MH0001.scaffold10980_2
MH0001.scaffold11075_2	O2.UC-23.scaffold73842_1
MH0001.scaffold11332_1	MH0001.scaffold11332_1
MH0001.scaffold11498_1	MH0001.scaffold11498_1
MH0001.scaffold11777_2	V1.UC-10.scaffold27570_5
MH0001.scaffold11976_2	MH0001.scaffold11976_2
MH0001.scaffold11986_3	MH0010.scaffold36924_2
MH0001.scaffold12895_8	MH0059.scaffold44747_17
MH0001.scaffold13937_2	MH0001.scaffold13937_2
MH0001.scaffold14365_3	MH0054.scaffold46345_1
MH0001.scaffold14876_2	MH0017.scaffold5183_8
MH0001.scaffold149_1	MH0026.scaffold1235_10
MH0001.scaffold149_2	MH0050.scaffold7168_2
MH0001.scaffold14_5	MH0001.scaffold14_5
MH0001.scaffold16223_3	MH0073.scaffold51915_1
MH0001.scaffold16746_3	MH0072.scaffold532_1
MH0001.scaffold17197_2	MH0001.scaffold17197_2
MH0001.scaffold17775_1	O2.UC-14.scaffold879_14
MH0001.scaffold17887_2	MH0001.scaffold17887_2
MH0001.scaffold1908_3	MH0001.scaffold1908_3
MH0001.scaffold19389_1	MH0059.scaffold3152_1
MH0001.scaffold19471_1	MH0010.scaffold14921_2
MH0001.scaffold19538_1	MH0082.scaffold38564_1
MH0001.scaffold1957_1	MH0026.scaffold5269_1
MH0001.scaffold2005_2	MH0001.scaffold2005_2
MH0001.scaffold20522_2	V1.UC-14.scaffold18565_6
MH0001.scaffold20720_2	MH0063.scaffold5031_8
MH0001.scaffold2083_7	V1.UC-14.scaffold51479_4
MH0001.scaffold21586_1	V1.CD-12.scaffold15254_1
MH0001.scaffold21689_1	MH0001.scaffold21689_1
MH0001.scaffold2178_10	MH0001.scaffold2178_10
MH0001.scaffold21812_1	MH0082.scaffold27904_2
MH0001.scaffold21829_1	MH0001.scaffold21829_1
MH0001.scaffold21866_2	MH0006.scaffold278321_2
MH0001.scaffold22042_1	MH0001.scaffold22042_1
MH0001.scaffold2333_2	V1.UC-14.scaffold34724_1
MH0001.scaffold2455_3	V1.UC-9.scaffold25356_1
MH0001.scaffold2858_2	V1.UC-6.scaffold28578_7
MH0001.scaffold3296_1	MH0038.scaffold30542_2
MH0001.scaffold331_2	MH0082.scaffold15897_5
MH0001.scaffold3351_2	O2.UC-1.scaffold2927_1
MH0001.scaffold3351_3	V1.UC-14.scaffold62795_2
MH0001.scaffold3386_1	MH0001.scaffold3386_1
MH0001.scaffold3556_2	MH0001.scaffold3556_2
MH0001.scaffold3851_1	MH0001.scaffold3851_1
MH0001.scaffold408_11	MH0084.scaffold9388_4
MH0001.scaffold4306_1	MH0064.scaffold1371_2
MH0001.scaffold4392_5	MH0005.scaffold32106_5
MH0001.scaffold4850_2	MH0001.scaffold4850_2
MH0001.scaffold493_1	MH0050.scaffold7168_1
MH0001.scaffold493_2	MH0001.scaffold493_2
MH0001.scaffold5606_1	MH0018.scaffold1682_3
MH0001.scaffold6436_2	MH0008.C1728612_1
MH0001.scaffold6445_6	MH0001.scaffold6445_6
MH0001.scaffold6445_7	MH0085.scaffold13328_5
MH0001.scaffold7682_3	O2.UC-1.scaffold31152_1
MH0001.scaffold769_3	MH0054.scaffold6741_1
MH0001.scaffold7850_2	V1.UC-6.scaffold26978_1
MH0001.scaffold8007_9	MH0076.scaffold71087_2
MH0001.scaffold8044_1	MH0082.scaffold38564_1
MH0001.scaffold8147_2	MH0073.scaffold11687_2
MH0001.scaffold8162_1	MH0014.scaffold21166_5
MH0001.scaffold8458_1	MH0070.scaffold3358_3
MH0001.scaffold8532_4	MH0004.C1521460_1
MH0001.scaffold857_8	MH0001.scaffold857_8
MH0001.scaffold863_1	MH0012.scaffold4425_1
MH0001.scaffold863_3	V1.UC-9.scaffold25356_3
MH0001.scaffold863_6	V1.UC-9.scaffold25356_1
MH0001.scaffold9029_2	MH0039.scaffold84780_1
MH0001.scaffold9815_21	MH0001.scaffold9815_21
MH0002.C3641715_1	MH0035.scaffold5110_1
MH0002.C3644107_1	V1.UC-19.scaffold12372_3
MH0002.C3651790_1	MH0086.scaffold31644_2
MH0002.C3655146_1	V1.CD-4.scaffold7298_3
MH0002.C3661756_1	V1.UC-14.scaffold30859_1
MH0002.C3670537_1	V1.CD-3.scaffold10648_4
MH0002.C3677441_1	V1.CD-9.scaffold6138_2
MH0002.C3680730_1	MH0053.scaffold54386_1
MH0002.C3686416_1	MH0034.scaffold15675_2
MH0002.C3687270_1	MH0045.scaffold187_18
MH0002.C3691250_1	MH0002.C3691250_1
MH0002.C3691378_1	MH0053.scaffold54386_1
MH0002.C3692792_1	MH0050.scaffold5063_7
MH0002.C3696064_1	V1.UC-14.scaffold63210_1
MH0002.C3699039_1	V1.UC-14.scaffold30859_1
MH0002.C3701283_1	MH0035.scaffold5110_1
MH0002.C3706921_1	MH0071.scaffold19835_3
MH0002.C3709523_1	MH0039.scaffold2017_3
MH0002.C3712465_1	MH0002.C3712465_1
MH0002.C3714471_1	MH0001.scaffold493_2
MH0002.C3719443_1	MH0002.C3719443_1
MH0002.C3721689_1	V1.UC-21.scaffold6166_18
MH0002.C3723305_1	MH0050.scaffold7168_1
MH0002.C3725873_1	MH0026.scaffold166_8
MH0002.C3727845_1	MH0085.scaffold44688_1
MH0002.C3729061_1	MH0079.scaffold13068_1
MH0002.C3729665_1	O2.UC-11.scaffold7313_1
MH0002.C3736629_1	MH0085.scaffold44688_1
MH0002.C3736773_1	MH0073.scaffold17148_3
MH0002.C3737929_1	MH0086.scaffold110835_2
MH0002.C3738771_1	MH0002.C3738771_1
MH0002.C3742445_1	MH0002.C3742445_1
MH0002.C3743631_1	MH0033.C3749208_1
MH0002.C3745129_1	MH0058.scaffold109525_2
MH0002.C3746851_1	MH0047.scaffold35026_1
MH0002.C3747233_1	MH0012.scaffold122_2
MH0002.C3752307_1	MH0075.scaffold43625_3
MH0002.C3754761_1	MH0042.scaffold29538_1
MH0002.C3756005_1	MH0002.C3756005_1
MH0002.C3756177_1	MH0002.C3756177_1
MH0002.C3756809_1	MH0002.C3756809_1
MH0002.C3759803_1	V1.UC-10.scaffold68573_1
MH0002.C3761607_1	V1.UC-14.scaffold30859_1
MH0002.C3762577_1	O2.UC-24.C5411470_1
MH0002.C3766227_1	MH0054.scaffold67824_4
MH0002.C3767579_1	MH0002.C3767579_1
MH0002.C3767959_1	V1.CD-14.scaffold56158_1
MH0002.C3768657_1	MH0028.scaffold31498_1
MH0002.scaffold10017_2	MH0002.scaffold10017_2
MH0002.scaffold10027_2	MH0086.scaffold31644_2
MH0002.scaffold10234_1	O2.UC-23.scaffold234_2
MH0002.scaffold10435_2	MH0077.scaffold6198_3
MH0002.scaffold10553_1	MH0070.scaffold102831_1
MH0002.scaffold10654_1	MH0026.scaffold22625_1
MH0002.scaffold10959_1	MH0002.scaffold10959_1
MH0002.scaffold11144_2	MH0071.scaffold8073_2
MH0002.scaffold11324_1	MH0002.scaffold11324_1
MH0002.scaffold11382_2	MH0081.scaffold19675_1
MH0002.scaffold1157_1	MH0002.scaffold1157_1
MH0002.scaffold11661_1	O2.UC-18.scaffold2699_1
MH0002.scaffold1175_1	MH0010.scaffold36924_2
MH0002.scaffold11945_3	MH0083.scaffold10421_7
MH0002.scaffold12041_2	MH0083.scaffold1734_1
MH0002.scaffold12140_5	O2.UC-12.scaffold730_4
MH0002.scaffold12325_1	O2.UC-18.scaffold4346_5
MH0002.scaffold12413_1	MH0002.scaffold12413_1
MH0002.scaffold12413_2	MH0003.scaffold5435_6
MH0002.scaffold12695_2	MH0002.scaffold12695_2
MH0002.scaffold12992_4	O2.UC-12.scaffold19895_4
MH0002.scaffold13272_1	MH0010.scaffold39262_2
MH0002.scaffold13467_4	MH0036.scaffold14124_7
MH0002.scaffold14005_14	MH0046.scaffold59362_3
MH0002.scaffold14005_17	MH0046.scaffold59362_3
MH0002.scaffold14005_6	MH0002.scaffold14005_6
MH0002.scaffold14128_3	MH0026.scaffold864_2
MH0002.scaffold14391_1	MH0072.scaffold1390_5
MH0002.scaffold14391_2	MH0072.scaffold1390_5
MH0002.scaffold14391_3	MH0072.scaffold1390_5
MH0002.scaffold14391_4	MH0072.scaffold1390_5
MH0002.scaffold14549_1	MH0002.scaffold14549_1
MH0002.scaffold14636_1	MH0071.scaffold19849_2
MH0002.scaffold14917_2	MH0032.scaffold1671_5
MH0002.scaffold14917_3	MH0059.scaffold3152_1
MH0002.scaffold15010_2	MH0083.scaffold10421_5
MH0002.scaffold15245_2	MH0006.scaffold3195_3
MH0002.scaffold15351_1	MH0002.scaffold15351_1
MH0002.scaffold15373_2	MH0065.scaffold53251_2
MH0002.scaffold15382_1	MH0049.scaffold17126_1
MH0002.scaffold15486_1	MH0002.scaffold15486_1
MH0002.scaffold15929_2	MH0040.scaffold9408_2
MH0002.scaffold15929_4	MH0086.scaffold10615_1
MH0002.scaffold16238_2	MH0002.scaffold16238_2
MH0002.scaffold1634_9	MH0006.scaffold91343_1
MH0002.scaffold16364_3	MH0059.scaffold4739_14
MH0002.scaffold16466_1	V1.CD-13.scaffold85137_4
MH0002.scaffold16635_2	V1.CD-13.scaffold36743_2
MH0002.scaffold16727_1	MH0014.scaffold21166_5
MH0002.scaffold16764_4	MH0002.scaffold16764_4
MH0002.scaffold16845_1	MH0083.scaffold16855_2
MH0002.scaffold16846_1	MH0016.scaffold10808_2
MH0002.scaffold17322_4	MH0002.scaffold17322_4
MH0002.scaffold17589_1	V1.UC-8.scaffold1644_1
MH0002.scaffold17589_4	V1.UC-8.scaffold1644_1
MH0002.scaffold17802_3	MH0012.scaffold105343_1
MH0002.scaffold17977_4	V1.UC-19.scaffold6148_14
MH0002.scaffold17977_5	MH0036.scaffold75808_6
MH0002.scaffold18022_5	MH0002.scaffold18022_5
MH0002.scaffold18201_1	MH0002.scaffold18201_1
MH0002.scaffold18265_2	V1.UC-9.scaffold4337_5
MH0002.scaffold18454_1	MH0054.scaffold21476_13
MH0002.scaffold18552_2	MH0071.scaffold12170_2
MH0002.scaffold18552_3	MH0071.scaffold12170_2
MH0002.scaffold1973_1	MH0046.scaffold17613_2
MH0002.scaffold20065_1	MH0002.scaffold20065_1
MH0002.scaffold20088_1	MH0002.scaffold20088_1
MH0002.scaffold20105_1	MH0082.scaffold18170_5
MH0002.scaffold2054_4	MH0074.scaffold6139_1
MH0002.scaffold21168_1	O2.UC-12.scaffold3458_8
MH0002.scaffold21395_1	O2.UC-24.scaffold47867_6
MH0002.scaffold21395_2	O2.UC-24.scaffold47867_6
MH0002.scaffold21640_3	MH0085.scaffold11350_4
MH0002.scaffold21640_7	MH0085.scaffold11350_4
MH0002.scaffold21804_2	MH0068.scaffold3523_1
MH0002.scaffold22504_1	V1.UC-14.scaffold62795_2
MH0002.scaffold22546_1	MH0081.scaffold74136_1
MH0002.scaffold23177_2	MH0057.scaffold6102_11
MH0002.scaffold23307_3	MH0012.scaffold28794_6
MH0002.scaffold23702_2	V1.CD-12.scaffold45176_1
MH0002.scaffold23848_2	MH0002.scaffold23848_2
MH0002.scaffold23855_1	O2.UC-22.scaffold1175_6
MH0002.scaffold23971_2	MH0049.scaffold8276_3
MH0002.scaffold24016_1	V1.CD-1.scaffold16875_2
MH0002.scaffold24506_1	MH0002.scaffold24506_1
MH0002.scaffold24697_3	MH0086.scaffold10615_2
MH0002.scaffold24893_1	MH0012.scaffold25695_1
MH0002.scaffold25225_9	MH0066.scaffold21116_1
MH0002.scaffold25666_1	MH0051.scaffold49107_1
MH0002.scaffold25744_1	MH0046.scaffold66261_2
MH0002.scaffold2620_1	MH0085.scaffold5816_3
MH0002.scaffold26213_4	MH0036.scaffold14124_7
MH0002.scaffold2668_2	MH0014.scaffold14766_2
MH0002.scaffold26731_2	MH0032.scaffold1671_5
MH0002.scaffold26885_1	V1.UC-8.scaffold51115_2
MH0002.scaffold26941_4	V1.CD-4.scaffold57821_1
MH0002.scaffold27093_2	MH0010.scaffold36924_2
MH0002.scaffold27212_1	MH0065.scaffold1025_4
MH0002.scaffold27446_1	MH0010.scaffold36924_2
MH0002.scaffold2753_1	MH0083.scaffold10421_5
MH0002.scaffold2753_3	V1.UC-6.scaffold9175_7
MH0002.scaffold27568_2	MH0063.scaffold25206_1
MH0002.scaffold28007_2	V1.UC-19.scaffold13982_3
MH0002.scaffold28176_1	MH0054.scaffold12510_1
MH0002.scaffold28540_2	O2.UC-11.scaffold30357_1
MH0002.scaffold28680_1	MH0086.scaffold13209_4
MH0002.scaffold28680_3	MH0086.scaffold13209_4
MH0002.scaffold28680_4	MH0086.scaffold13209_4
MH0002.scaffold28680_5	MH0086.scaffold13209_4
MH0002.scaffold288_1	MH0010.scaffold36924_2
MH0002.scaffold29181_4	MH0006.scaffold1544_3
MH0002.scaffold29321_1	MH0071.scaffold450_3
MH0002.scaffold30274_2	MH0080.scaffold96782_1
MH0002.scaffold31040_4	MH0049.scaffold2941_4
MH0002.scaffold3106_3	MH0045.scaffold16782_15
MH0002.scaffold3114_2	MH0020.scaffold4785_3
MH0002.scaffold31154_1	MH0083.scaffold10421_5
MH0002.scaffold31249_1	MH0086.scaffold31644_2
MH0002.scaffold31369_2	MH0074.scaffold6219_2
MH0002.scaffold31485_1	V1.UC-14.scaffold62795_2
MH0002.scaffold3148_3	V1.UC-13.scaffold2246_3
MH0002.scaffold32010_1	O2.UC-24.scaffold47867_6
MH0002.scaffold32010_3	O2.UC-24.scaffold47867_6
MH0002.scaffold32010_5	O2.UC-24.scaffold47867_6
MH0002.scaffold32010_6	O2.UC-24.scaffold47867_6
MH0002.scaffold32136_3	MH0002.scaffold32136_3
MH0002.scaffold3245_2	MH0050.scaffold7168_2
MH0002.scaffold3245_3	MH0026.scaffold1235_10
MH0002.scaffold3245_4	MH0002.scaffold3245_4
MH0002.scaffold32863_2	MH0072.scaffold37672_1
MH0002.scaffold33362_2	V1.UC-8.scaffold57310_3
MH0002.scaffold33362_4	MH0014.scaffold21166_5
MH0002.scaffold33702_1	MH0002.scaffold33702_1
MH0002.scaffold33751_1	MH0045.scaffold16782_10
MH0002.scaffold33959_1	MH0066.scaffold1420_1
MH0002.scaffold33985_2	V1.UC-19.scaffold11808_1
MH0002.scaffold34329_1	MH0030.scaffold2277_2
MH0002.scaffold34783_1	MH0002.scaffold34783_1
MH0002.scaffold34925_1	MH0050.scaffold7168_1
MH0002.scaffold35110_2	V1.UC-6.scaffold47340_2
MH0002.scaffold35243_2	MH0039.scaffold2260_1
MH0002.scaffold3529_1	O2.UC-24.scaffold47867_8
MH0002.scaffold35611_2	MH0010.scaffold36924_2
MH0002.scaffold35898_1	MH0002.scaffold35898_1
MH0002.scaffold36103_2	MH0034.scaffold3827_2
MH0002.scaffold36103_3	MH0086.scaffold10615_9
MH0002.scaffold36153_3	MH0002.scaffold36153_3
MH0002.scaffold3648_5	MH0086.scaffold542_4
MH0002.scaffold36607_1	MH0035.scaffold5110_1
MH0002.scaffold37482_1	MH0014.scaffold55358_2
MH0002.scaffold37810_1	MH0034.scaffold15675_2
MH0002.scaffold37810_2	MH0002.scaffold37810_2
MH0002.scaffold38284_2	V1.CD-1.scaffold16875_2
MH0002.scaffold38316_2	MH0045.scaffold16782_10
MH0002.scaffold3837_11	V1.UC-13.scaffold5061_3
MH0002.scaffold38444_1	MH0002.scaffold38444_1
MH0002.scaffold38627_2	MH0071.scaffold11476_1
MH0002.scaffold38656_1	MH0002.scaffold38656_1
MH0002.scaffold389_4	MH0012.scaffold25695_1
MH0002.scaffold389_7	MH0012.scaffold25695_1
MH0002.scaffold389_8	MH0012.scaffold25695_1
MH0002.scaffold389_9	MH0012.scaffold25695_1
MH0002.scaffold39179_1	MH0053.scaffold92604_2
MH0002.scaffold3929_2	MH0010.scaffold36924_2
MH0002.scaffold39569_2	MH0042.scaffold18307_2
MH0002.scaffold40490_1	MH0020.scaffold7895_2
MH0002.scaffold40586_2	MH0070.scaffold26078_1
MH0002.scaffold4069_4	MH0003.scaffold13775_4
MH0002.scaffold4069_5	MH0010.scaffold39262_2
MH0002.scaffold4070_1	MH0070.scaffold102831_1
MH0002.scaffold4075_1	MH0016.scaffold10808_1
MH0002.scaffold4075_2	MH0016.scaffold10808_1
MH0002.scaffold40840_1	MH0016.scaffold10808_2
MH0002.scaffold41091_6	V1.UC-9.scaffold44713_3
MH0002.scaffold41889_5	MH0002.scaffold41889_5
MH0002.scaffold41967_2	MH0002.scaffold41967_2
MH0002.scaffold41994_4	MH0002.scaffold41994_4
MH0002.scaffold41994_7	O2.UC-20.scaffold48962_1
MH0002.scaffold42046_2	V1.UC-9.scaffold28418_2
MH0002.scaffold42115_2	MH0085.scaffold10046_10
MH0002.scaffold4302_2	MH0044.scaffold7761_10
MH0002.scaffold43031_1	MH0049.scaffold15669_1
MH0002.scaffold43891_2	MH0076.scaffold13228_2
MH0002.scaffold44224_1	O2.UC-17.scaffold724_1
MH0002.scaffold44276_1	MH0032.scaffold1671_5
MH0002.scaffold44395_3	MH0071.scaffold5909_7
MH0002.scaffold44428_1	O2.UC-18.scaffold753_2
MH0002.scaffold44739_1	MH0020.scaffold3213_5
MH0002.scaffold44857_2	MH0021.C2090245_1
MH0002.scaffold45020_1	MH0002.scaffold45020_1
MH0002.scaffold4521_2	O2.UC-1.scaffold2667_9
MH0002.scaffold45286_3	MH0061.scaffold28685_2
MH0002.scaffold46330_3	O2.UC-4.scaffold4504_1
MH0002.scaffold46943_1	MH0075.scaffold27183_3
MH0002.scaffold47504_2	V1.UC-6.scaffold15180_1
MH0002.scaffold47784_1	MH0032.scaffold1671_6
MH0002.scaffold48527_1	O2.UC-19.scaffold5808_2
MH0002.scaffold48869_3	MH0083.scaffold29939_6
MH0002.scaffold4911_2	MH0010.scaffold36924_2
MH0002.scaffold49846_1	MH0059.scaffold3152_1
MH0002.scaffold50026_1	MH0031.scaffold86816_1
MH0002.scaffold50288_2	MH0012.scaffold105343_1
MH0002.scaffold5078_1	MH0002.scaffold5078_1
MH0002.scaffold51188_6	MH0074.scaffold32971_1
MH0002.scaffold51356_3	MH0002.scaffold51356_3
MH0002.scaffold5141_1	MH0037.scaffold63769_1
MH0002.scaffold51451_4	MH0072.scaffold1390_5
MH0002.scaffold51451_5	MH0072.scaffold1390_5
MH0002.scaffold51451_6	MH0072.scaffold1390_5
MH0002.scaffold52542_1	O2.UC-18.scaffold362_10
MH0002.scaffold5275_1	MH0028.scaffold31498_3
MH0002.scaffold5277_1	MH0070.scaffold102831_1
MH0002.scaffold5277_4	MH0070.scaffold102831_1
MH0002.scaffold52918_2	O2.UC-23.scaffold10559_12
MH0002.scaffold5337_1	MH0049.scaffold3062_1
MH0002.scaffold53653_1	MH0071.scaffold1136_3
MH0002.scaffold53838_8	MH0002.scaffold53838_8
MH0002.scaffold53935_2	MH0081.scaffold88968_1
MH0002.scaffold54244_1	MH0012.scaffold49857_3
MH0002.scaffold54611_1	MH0002.scaffold54611_1
MH0002.scaffold54827_2	MH0032.scaffold5582_23
MH0002.scaffold5638_2	MH0002.scaffold5638_2
MH0002.scaffold57423_2	V1.UC-6.scaffold60080_2
MH0002.scaffold57751_3	MH0002.scaffold57751_3
MH0002.scaffold57_1	V1.UC-19.scaffold7737_2
MH0002.scaffold58181_4	O2.UC-19.scaffold13715_1
MH0002.scaffold58209_1	MH0050.scaffold7168_1
MH0002.scaffold58209_2	MH0050.scaffold7168_1
MH0002.scaffold58542_7	MH0002.scaffold58542_7
MH0002.scaffold58765_2	MH0061.scaffold786_1
MH0002.scaffold59011_1	MH0002.scaffold59011_1
MH0002.scaffold59018_2	O2.UC-4.scaffold4504_1
MH0002.scaffold59064_1	MH0003.scaffold4958_2
MH0002.scaffold5972_2	MH0002.scaffold5972_2
MH0002.scaffold60091_2	MH0011.scaffold23763_6
MH0002.scaffold60107_2	MH0032.scaffold1671_5
MH0002.scaffold6070_6	MH0039.scaffold21724_3
MH0002.scaffold6070_7	MH0009.scaffold3233_2
MH0002.scaffold6070_8	MH0039.scaffold21724_3
MH0002.scaffold6070_9	MH0009.scaffold3233_2
MH0002.scaffold6086_7	MH0002.scaffold6086_7
MH0002.scaffold6105_1	MH0083.scaffold62248_2
MH0002.scaffold6193_1	MH0016.scaffold10808_1
MH0002.scaffold62455_1	MH0036.scaffold2806_2
MH0002.scaffold62521_3	V1.CD-14.scaffold16357_1
MH0002.scaffold62987_1	MH0062.scaffold10832_3
MH0002.scaffold63041_2	MH0072.scaffold15064_2
MH0002.scaffold63338_1	O2.UC-4.scaffold2007_1
MH0002.scaffold63338_2	V1.CD-13.scaffold85137_4
MH0002.scaffold63338_3	V1.UC-21.scaffold19116_2
MH0002.scaffold6387_3	V1.UC-21.scaffold6851_6
MH0002.scaffold64942_1	MH0086.scaffold13209_4
MH0002.scaffold65326_1	V1.UC-9.scaffold793_10
MH0002.scaffold6573_1	MH0041.scaffold7279_1
MH0002.scaffold65783_3	MH0002.scaffold65783_3
MH0002.scaffold65837_1	MH0081.scaffold1979_5
MH0002.scaffold6591_2	MH0002.scaffold6591_2
MH0002.scaffold6638_1	MH0085.scaffold44065_2
MH0002.scaffold6638_2	V1.UC-19.scaffold7737_2
MH0002.scaffold66739_2	V1.UC-14.scaffold23723_1
MH0002.scaffold66801_2	MH0086.scaffold10615_2
MH0002.scaffold66943_2	MH0086.scaffold13209_4
MH0002.scaffold66998_1	MH0035.scaffold31273_2
MH0002.scaffold67148_1	MH0016.scaffold48710_2
MH0002.scaffold68404_2	MH0054.scaffold943_20
MH0002.scaffold68404_4	MH0054.scaffold943_20
MH0002.scaffold68447_1	MH0002.scaffold68447_1
MH0002.scaffold68704_4	MH0085.scaffold1873_1
MH0002.scaffold69572_2	MH0002.scaffold69572_2
MH0002.scaffold69879_1	MH0039.scaffold42402_1
MH0002.scaffold70664_1	V1.UC-13.scaffold4943_6
MH0002.scaffold71078_1	MH0049.scaffold23263_1
MH0002.scaffold7133_1	MH0083.scaffold10421_2
MH0002.scaffold7133_4	MH0083.scaffold10421_2
MH0002.scaffold71697_3	MH0065.scaffold50250_2
MH0002.scaffold7182_3	MH0064.scaffold13449_5
MH0002.scaffold7215_2	MH0066.scaffold16527_9
MH0002.scaffold72168_1	MH0002.scaffold72168_1
MH0002.scaffold72801_1	MH0035.scaffold5110_1
MH0002.scaffold7369_2	MH0010.scaffold36924_2
MH0002.scaffold73713_3	MH0002.scaffold73713_3
MH0002.scaffold7458_1	MH0002.scaffold7458_1
MH0002.scaffold75071_1	MH0068.scaffold59816_2
MH0002.scaffold7544_4	MH0011.scaffold2228_6
MH0002.scaffold75460_3	MH0039.scaffold12233_1
MH0002.scaffold75460_4	MH0039.scaffold12233_1
MH0002.scaffold75460_9	MH0039.scaffold12233_1
MH0002.scaffold76229_1	MH0009.scaffold41051_3
MH0002.scaffold770_1	MH0002.scaffold770_1
MH0002.scaffold770_2	MH0077.scaffold39905_2
MH0002.scaffold770_5	MH0077.scaffold39905_2
MH0002.scaffold770_6	MH0077.scaffold39905_2
MH0002.scaffold7753_3	MH0061.scaffold4195_4
MH0002.scaffold7803_2	MH0059.scaffold26881_8
MH0002.scaffold78054_1	MH0012.scaffold2826_16
MH0002.scaffold78304_3	MH0056.scaffold43517_1
MH0002.scaffold7866_1	MH0049.scaffold11826_1
MH0002.scaffold78907_1	O2.UC-20.scaffold42649_1
MH0002.scaffold7924_1	V1.CD-12.scaffold15316_2
MH0002.scaffold80005_1	V1.CD-11.scaffold5138_13
MH0002.scaffold8008_14	MH0003.scaffold3832_3
MH0002.scaffold8008_7	MH0003.scaffold3832_3
MH0002.scaffold8068_1	V1.CD-14.scaffold1847_1
MH0002.scaffold81008_2	MH0050.scaffold88735_1
MH0002.scaffold81065_2	MH0026.scaffold11924_3
MH0002.scaffold81073_2	V1.UC-14.scaffold62795_2
MH0002.scaffold81236_1	MH0002.scaffold81236_1
MH0002.scaffold81704_4	MH0002.scaffold81704_4
MH0002.scaffold82295_1	V1.UC-14.scaffold30859_1
MH0002.scaffold82565_1	MH0070.scaffold26078_1
MH0002.scaffold83508_1	MH0012.scaffold2559_9
MH0002.scaffold83712_2	MH0025.scaffold42567_1
MH0002.scaffold83742_3	MH0021.scaffold71712_1
MH0002.scaffold83742_4	MH0086.scaffold10615_6
MH0002.scaffold84417_1	MH0002.scaffold84417_1
MH0002.scaffold8486_1	MH0073.scaffold7952_3
MH0002.scaffold84975_1	MH0068.scaffold44966_3
MH0002.scaffold85082_2	MH0002.scaffold85082_2
MH0002.scaffold85092_2	MH0002.scaffold85092_2
MH0002.scaffold85135_1	MH0002.scaffold85135_1
MH0002.scaffold85230_1	MH0002.scaffold85230_1
MH0002.scaffold85555_2	V1.UC-19.scaffold163_2
MH0002.scaffold85735_2	MH0022.scaffold53395_2
MH0002.scaffold85765_2	MH0049.scaffold198_3
MH0002.scaffold85787_1	MH0068.scaffold2598_1
MH0002.scaffold8634_2	MH0067.scaffold13975_4
MH0002.scaffold86490_1	MH0083.scaffold29939_5
MH0002.scaffold86706_2	V1.CD-9.scaffold29388_1
MH0002.scaffold86720_1	MH0002.scaffold86720_1
MH0002.scaffold87302_2	O2.UC-24.scaffold47867_8
MH0002.scaffold87481_3	MH0067.scaffold10776_5
MH0002.scaffold87585_2	MH0013.scaffold739_4
MH0002.scaffold88059_1	MH0002.scaffold88059_1
MH0002.scaffold88235_1	MH0002.scaffold88235_1
MH0002.scaffold8857_3	V1.UC-21.scaffold1071_2
MH0002.scaffold8869_2	MH0082.scaffold18170_5
MH0002.scaffold88705_3	MH0061.scaffold9637_5
MH0002.scaffold88866_1	MH0071.scaffold5909_7
MH0002.scaffold88878_1	MH0002.scaffold88878_1
MH0002.scaffold89341_1	MH0034.scaffold58_9
MH0002.scaffold89354_2	V1.UC-14.scaffold85328_1
MH0002.scaffold89511_1	MH0039.scaffold86380_1
MH0002.scaffold89557_2	O2.UC-23.scaffold21764_6
MH0002.scaffold896_1	MH0002.scaffold896_1
MH0002.scaffold89914_1	MH0045.scaffold53253_5
MH0002.scaffold89914_2	MH0078.scaffold39191_1
MH0002.scaffold89914_3	O2.UC-24.scaffold47867_10
MH0002.scaffold89928_2	MH0002.scaffold89928_2
MH0002.scaffold90156_1	MH0036.scaffold14124_7
MH0002.scaffold903_2	MH0002.scaffold903_2
MH0002.scaffold90469_3	O2.UC-24.scaffold47867_8
MH0002.scaffold90898_2	MH0002.scaffold90898_2
MH0002.scaffold90929_1	MH0035.scaffold5110_1
MH0002.scaffold91019_3	MH0002.scaffold91019_3
MH0002.scaffold91355_3	MH0085.scaffold300_2
MH0002.scaffold91559_2	MH0022.scaffold53395_2
MH0002.scaffold9156_2	MH0050.scaffold56272_1
MH0002.scaffold91853_1	MH0048.scaffold62640_1
MH0002.scaffold92052_1	V1.UC-14.scaffold89644_1
MH0002.scaffold92305_2	V1.UC-19.scaffold67072_1
MH0002.scaffold92607_2	MH0002.scaffold92607_2
MH0002.scaffold92753_2	MH0066.scaffold23769_1
MH0002.scaffold93295_2	MH0011.scaffold3664_4
MH0002.scaffold93376_1	V1.UC-14.scaffold30859_1
MH0002.scaffold93556_1	MH0065.scaffold13536_3
MH0002.scaffold93692_1	MH0045.scaffold16782_10
MH0002.scaffold93735_2	MH0025.scaffold105015_1
MH0002.scaffold93959_1	V1.UC-9.scaffold25497_1
MH0002.scaffold94134_1	MH0057.scaffold35714_8
MH0002.scaffold94193_1	MH0002.scaffold94193_1
MH0002.scaffold94610_1	V1.UC-18.scaffold30596_1
MH0002.scaffold94700_1	MH0058.scaffold109525_1
MH0002.scaffold94733_2	MH0002.scaffold94733_2
MH0002.scaffold94928_1	MH0004.C1525510_1
MH0002.scaffold95003_1	MH0002.scaffold95003_1
MH0002.scaffold95087_1	MH0053.scaffold33670_2
MH0002.scaffold95211_1	MH0002.scaffold95211_1
MH0002.scaffold95268_1	MH0002.scaffold95268_1
MH0002.scaffold95380_1	MH0058.scaffold109525_2
MH0002.scaffold95450_1	MH0063.scaffold7283_3
MH0002.scaffold9553_1	V1.UC-10.scaffold27570_5
MH0002.scaffold9553_2	V1.UC-10.scaffold27570_5
MH0002.scaffold9553_3	O2.UC-13.scaffold16107_3
MH0002.scaffold9553_4	O2.UC-24.scaffold7305_2
MH0002.scaffold9553_5	O2.UC-13.scaffold16107_3
MH0002.scaffold9553_6	MH0014.scaffold32723_1
MH0002.scaffold9553_7	V1.UC-10.scaffold27570_5
MH0002.scaffold9678_3	MH0086.scaffold31644_3
MH0002.scaffold9678_4	MH0086.scaffold31644_3
MH0003.C3773618_1	MH0003.C3773618_1
MH0003.C3781501_1	MH0083.scaffold34297_9
MH0003.C3784029_1	V1.UC-6.scaffold9175_7
MH0003.C3790833_1	MH0056.scaffold62044_1
MH0003.C3791121_1	MH0003.C3791121_1
MH0003.C3793599_1	MH0020.scaffold46837_1
MH0003.C3798097_1	V1.UC-10.scaffold36768_2
MH0003.C3800307_1	MH0074.scaffold17336_6
MH0003.C3802327_1	MH0003.C3802327_1
MH0003.C3802927_1	V1.UC-6.scaffold60080_2
MH0003.C3804003_1	MH0059.scaffold89338_1
MH0003.C3817828_1	V1.UC-15.scaffold39177_2
MH0003.C3820232_1	MH0039.scaffold21727_1
MH0003.C3823494_1	MH0053.scaffold54386_1
MH0003.C3831250_1	MH0084.scaffold45554_1
MH0003.C3831260_1	V1.UC-14.scaffold34724_1
MH0003.C3834358_1	MH0026.scaffold1235_10
MH0003.C3834896_1	MH0086.scaffold110835_2
MH0003.C3845864_1	MH0049.scaffold3062_1
MH0003.C3848062_1	O2.UC-22.scaffold1545_1
MH0003.C3849894_1	MH0003.C3849894_1
MH0003.C3850410_1	MH0003.C3850410_1
MH0003.C3854774_1	V1.UC-9.scaffold8804_2
MH0003.C3856038_1	MH0070.scaffold41858_1
MH0003.C3859102_1	V1.UC-14.scaffold34724_1
MH0003.C3862998_1	V1.CD-8.scaffold111064_3
MH0003.C3870446_1	V1.CD-8.scaffold111064_3
MH0003.C3870558_1	V1.UC-18.scaffold12733_1
MH0003.C3871392_1	MH0037.scaffold6927_1
MH0003.C3877740_1	O2.UC-22.scaffold43274_1
MH0003.C3884620_1	MH0014.scaffold4708_1
MH0003.C3887648_1	MH0003.C3887648_1
MH0003.C3894360_1	MH0003.C3894360_1
MH0003.C3894922_1	MH0028.scaffold70657_2
MH0003.C3902128_1	MH0080.scaffold23991_1
MH0003.C3902206_1	MH0067.scaffold50515_1
MH0003.C3903036_1	O2.UC-4.scaffold12363_1
MH0003.C3906396_1	MH0018.scaffold24182_2
MH0003.C3907418_1	V1.UC-19.scaffold1267_3
MH0003.C3913836_1	MH0067.scaffold3734_2
MH0003.C3915698_1	MH0003.C3915698_1
MH0003.C3918058_1	MH0003.C3918058_1
MH0003.C3918836_1	MH0003.C3918836_1
MH0003.C3925612_1	MH0014.scaffold4708_1
MH0003.C3930682_1	MH0014.scaffold4708_1
MH0003.C3931114_1	MH0014.scaffold4708_1
MH0003.C3931146_1	MH0003.C3931146_1
MH0003.C3932798_1	MH0003.C3932798_1
MH0003.C3933348_1	O2.UC-4.scaffold21556_1
MH0003.scaffold10074_3	MH0050.scaffold7168_1
MH0003.scaffold100_1	MH0083.scaffold1988_10
MH0003.scaffold10179_5	MH0085.scaffold3014_4
MH0003.scaffold10462_4	MH0020.scaffold17699_2
MH0003.scaffold10529_1	MH0003.scaffold10529_1
MH0003.scaffold1058_1	MH0003.scaffold1058_1
MH0003.scaffold10614_4	MH0003.scaffold10614_4
MH0003.scaffold1062_1	MH0003.scaffold1062_1
MH0003.scaffold10857_1	MH0049.scaffold15669_1
MH0003.scaffold10879_1	MH0003.scaffold10879_1
MH0003.scaffold10896_10	V1.UC-18.scaffold3682_10
MH0003.scaffold10896_12	V1.UC-18.scaffold3682_10
MH0003.scaffold11050_5	MH0068.scaffold378_6
MH0003.scaffold11131_2	MH0039.scaffold79511_1
MH0003.scaffold11289_1	MH0011.scaffold72651_5
MH0003.scaffold11560_1	MH0003.scaffold11560_1
MH0003.scaffold11704_2	MH0036.scaffold16679_2
MH0003.scaffold11968_1	V1.CD-6.scaffold19332_2
MH0003.scaffold12561_1	V1.UC-8.C3987466_1
MH0003.scaffold12617_1	MH0003.scaffold12617_1
MH0003.scaffold12634_1	V1.CD-15.scaffold16275_1
MH0003.scaffold12642_1	MH0049.scaffold198_3
MH0003.scaffold12721_1	MH0062.scaffold10832_3
MH0003.scaffold13395_2	O2.UC-18.scaffold4346_5
MH0003.scaffold13641_1	MH0003.scaffold13641_1
MH0003.scaffold13641_2	MH0003.scaffold13641_2
MH0003.scaffold13775_1	MH0003.scaffold13775_1
MH0003.scaffold13775_4	MH0003.scaffold13775_4
MH0003.scaffold13775_7	MH0065.scaffold5171_3
MH0003.scaffold13904_2	MH0003.scaffold13904_2
MH0003.scaffold14004_1	O2.UC-12.scaffold3458_8
MH0003.scaffold14162_2	MH0071.scaffold5909_7
MH0003.scaffold14177_5	V1.UC-18.scaffold39_17
MH0003.scaffold14294_1	MH0003.scaffold14294_1
MH0003.scaffold14581_3	O2.UC-18.scaffold4440_3
MH0003.scaffold14642_3	MH0044.scaffold7908_7
MH0003.scaffold14642_4	MH0044.scaffold7908_7
MH0003.scaffold14642_5	MH0044.scaffold7908_7
MH0003.scaffold14642_8	MH0003.scaffold14642_8
MH0003.scaffold14835_3	V1.CD-6.scaffold2331_1
MH0003.scaffold1491_1	MH0003.scaffold1491_1
MH0003.scaffold15039_2	MH0040.scaffold23751_4
MH0003.scaffold15039_3	MH0040.scaffold23751_4
MH0003.scaffold15039_4	MH0040.scaffold23751_4
MH0003.scaffold15039_5	MH0040.scaffold23751_4
MH0003.scaffold15039_8	MH0003.scaffold15039_8
MH0003.scaffold15535_2	MH0040.scaffold23751_4
MH0003.scaffold15669_1	MH0003.scaffold15669_1
MH0003.scaffold15774_1	MH0020.scaffold365_1
MH0003.scaffold15785_1	V1.UC-15.scaffold16828_1
MH0003.scaffold15785_2	V1.UC-19.scaffold36897_3
MH0003.scaffold15785_3	V1.UC-19.scaffold36897_3
MH0003.scaffold15885_2	MH0067.scaffold2563_5
MH0003.scaffold16039_1	V1.UC-18.scaffold5435_7
MH0003.scaffold16164_1	MH0003.scaffold16164_1
MH0003.scaffold16202_2	V1.UC-10.scaffold99399_1
MH0003.scaffold16276_3	MH0067.scaffold6234_4
MH0003.scaffold16276_4	MH0012.scaffold80643_4
MH0003.scaffold16392_1	MH0003.scaffold16392_1
MH0003.scaffold16392_2	V1.UC-19.scaffold20285_1
MH0003.scaffold16426_1	MH0003.scaffold16426_1
MH0003.scaffold16426_3	MH0006.scaffold134601_2
MH0003.scaffold16426_4	MH0006.scaffold134601_2
MH0003.scaffold16426_5	MH0003.scaffold16426_5
MH0003.scaffold16546_2	MH0083.scaffold17932_5
MH0003.scaffold1654_2	MH0003.scaffold1654_2
MH0003.scaffold16686_1	MH0041.scaffold7140_6
MH0003.scaffold16832_4	MH0044.scaffold4270_5
MH0003.scaffold16911_1	MH0003.scaffold16911_1
MH0003.scaffold16911_2	MH0003.scaffold16911_2
MH0003.scaffold16911_3	O2.UC-22.scaffold23845_5
MH0003.scaffold16911_6	MH0083.scaffold69057_8
MH0003.scaffold16911_7	MH0012.scaffold40804_9
MH0003.scaffold16911_8	MH0003.scaffold16911_8
MH0003.scaffold16926_1	MH0072.scaffold59530_1
MH0003.scaffold17045_2	MH0071.scaffold19849_2
MH0003.scaffold17194_1	V1.UC-21.scaffold7885_1
MH0003.scaffold17226_1	MH0003.scaffold17226_1
MH0003.scaffold1725_2	O2.UC-1.scaffold31152_1
MH0003.scaffold17535_1	MH0012.scaffold4425_1
MH0003.scaffold17678_1	V1.CD-9.scaffold14858_4
MH0003.scaffold18223_1	MH0059.scaffold89338_1
MH0003.scaffold18223_2	MH0059.scaffold89338_1
MH0003.scaffold18223_3	MH0059.scaffold89338_1
MH0003.scaffold18303_1	MH0071.scaffold5909_7
MH0003.scaffold18327_1	V1.UC-9.scaffold25356_1
MH0003.scaffold18390_3	V1.UC-21.scaffold6563_11
MH0003.scaffold18390_4	V1.CD-6.scaffold42435_2
MH0003.scaffold18799_1	MH0085.scaffold1459_1
MH0003.scaffold18856_1	V1.UC-13.scaffold1490_1
MH0003.scaffold19116_1	O2.UC-4.scaffold10363_1
MH0003.scaffold19257_1	MH0003.scaffold19257_1
MH0003.scaffold19276_1	MH0003.scaffold19276_1
MH0003.scaffold19431_1	MH0034.scaffold1859_24
MH0003.scaffold19459_4	MH0062.scaffold3058_1
MH0003.scaffold19524_14	MH0067.scaffold15194_8
MH0003.scaffold19888_3	V1.UC-18.scaffold666_2
MH0003.scaffold20011_5	MH0036.scaffold35680_1
MH0003.scaffold20102_1	MH0059.scaffold89338_1
MH0003.scaffold20451_1	MH0039.scaffold21727_1
MH0003.scaffold20451_2	MH0039.scaffold21727_1
MH0003.scaffold20571_3	V1.CD-14.scaffold56158_1
MH0003.scaffold20926_1	MH0003.scaffold20926_1
MH0003.scaffold21021_1	MH0044.scaffold25832_3
MH0003.scaffold21201_1	MH0081.scaffold83854_1
MH0003.scaffold21299_2	MH0040.scaffold20215_1
MH0003.scaffold21302_3	MH0085.scaffold5816_3
MH0003.scaffold21407_3	MH0008.scaffold6363_1
MH0003.scaffold21441_11	V1.UC-13.scaffold5882_7
MH0003.scaffold21738_2	MH0068.scaffold17211_1
MH0003.scaffold21835_3	MH0020.scaffold12218_1
MH0003.scaffold22146_2	MH0003.scaffold22146_2
MH0003.scaffold22215_3	V1.UC-6.scaffold26978_1
MH0003.scaffold22215_4	V1.CD-3.scaffold6247_9
MH0003.scaffold22344_1	V1.UC-19.scaffold7737_2
MH0003.scaffold22530_1	MH0003.scaffold22530_1
MH0003.scaffold22684_1	MH0062.scaffold4938_2
MH0003.scaffold22684_2	MH0044.scaffold32213_2
MH0003.scaffold23087_1	MH0003.scaffold23087_1
MH0003.scaffold23146_1	MH0051.scaffold51308_2
MH0003.scaffold23497_2	V1.UC-7.scaffold455_1
MH0003.scaffold23497_3	MH0003.scaffold23497_3
MH0003.scaffold24032_4	MH0057.scaffold4127_1
MH0003.scaffold24184_1	MH0003.scaffold24184_1
MH0003.scaffold24391_4	MH0020.scaffold5499_4
MH0003.scaffold24392_1	MH0039.scaffold21727_1
MH0003.scaffold24414_2	MH0066.scaffold165_3
MH0003.scaffold24559_1	MH0083.scaffold1988_10
MH0003.scaffold2469_6	O2.UC-18.scaffold1677_1
MH0003.scaffold24756_3	MH0066.C3423582_1
MH0003.scaffold25544_1	MH0075.scaffold91_2
MH0003.scaffold25786_1	MH0071.scaffold12170_2
MH0003.scaffold26191_2	MH0003.scaffold26191_2
MH0003.scaffold26191_3	MH0036.scaffold89379_1
MH0003.scaffold26191_5	MH0052.scaffold69241_1
MH0003.scaffold26227_3	O2.UC-18.scaffold753_2
MH0003.scaffold26802_2	MH0003.scaffold26802_2
MH0003.scaffold26926_4	MH0003.scaffold26926_4
MH0003.scaffold27139_4	MH0003.scaffold27139_4
MH0003.scaffold27496_1	MH0068.scaffold17211_1
MH0003.scaffold27590_2	MH0071.scaffold8073_2
MH0003.scaffold27864_1	MH0018.scaffold24182_2
MH0003.scaffold27978_1	MH0034.scaffold58_9
MH0003.scaffold28128_2	MH0075.scaffold82755_1
MH0003.scaffold28235_5	MH0039.scaffold21727_1
MH0003.scaffold28235_6	MH0003.scaffold28235_6
MH0003.scaffold28235_7	MH0039.scaffold21727_1
MH0003.scaffold28283_2	O2.UC-22.scaffold43274_1
MH0003.scaffold28283_3	O2.UC-22.scaffold43274_1
MH0003.scaffold28431_2	MH0003.scaffold28431_2
MH0003.scaffold28431_3	V1.CD-3.scaffold42804_3
MH0003.scaffold28551_2	V1.CD-15.scaffold1174_1
MH0003.scaffold28560_1	MH0062.scaffold29986_4
MH0003.scaffold2882_5	MH0003.scaffold2882_5
MH0003.scaffold29079_1	MH0017.scaffold43443_1
MH0003.scaffold29080_3	MH0064.scaffold11201_3
MH0003.scaffold29260_4	MH0086.scaffold9260_1
MH0003.scaffold2927_1	MH0003.scaffold2927_1
MH0003.scaffold2927_2	MH0003.scaffold2927_2
MH0003.scaffold29645_1	MH0070.scaffold15739_2
MH0003.scaffold29645_2	MH0003.scaffold29645_2
MH0003.scaffold29758_3	MH0058.scaffold26421_13
MH0003.scaffold29912_1	MH0003.scaffold29912_1
MH0003.scaffold30327_3	MH0055.scaffold17878_4
MH0003.scaffold30358_3	MH0085.scaffold20715_6
MH0003.scaffold30358_4	MH0085.scaffold20715_6
MH0003.scaffold30439_4	V1.CD-15.scaffold27065_1
MH0003.scaffold30448_1	MH0045.scaffold34727_1
MH0003.scaffold30448_2	O2.UC-4.scaffold31045_2
MH0003.scaffold30478_1	MH0003.scaffold30478_1
MH0003.scaffold31297_1	MH0064.scaffold6114_8
MH0003.scaffold31302_4	MH0081.scaffold78847_4
MH0003.scaffold31345_5	V1.UC-15.scaffold19228_1
MH0003.scaffold31600_2	MH0062.scaffold6350_1
MH0003.scaffold31717_5	MH0067.scaffold712_1
MH0003.scaffold31728_3	V1.UC-15.scaffold4546_3
MH0003.scaffold31728_8	MH0038.scaffold9012_1
MH0003.scaffold32047_1	MH0058.scaffold19676_1
MH0003.scaffold32173_1	MH0041.scaffold20083_1
MH0003.scaffold32347_1	MH0003.scaffold32347_1
MH0003.scaffold323_1	MH0003.scaffold323_1
MH0003.scaffold33740_1	MH0039.scaffold21727_6
MH0003.scaffold33744_1	MH0003.scaffold33744_1
MH0003.scaffold33913_1	V1.UC-19.scaffold11808_1
MH0003.scaffold34022_1	MH0003.scaffold34022_1
MH0003.scaffold34131_2	V1.UC-15.scaffold26782_3
MH0003.scaffold34344_2	MH0068.scaffold996_4
MH0003.scaffold34989_1	MH0075.scaffold32820_1
MH0003.scaffold35063_1	MH0085.scaffold11350_4
MH0003.scaffold35063_5	MH0062.scaffold24884_2
MH0003.scaffold35658_1	V1.UC-7.scaffold8282_1
MH0003.scaffold35809_1	MH0013.C1642279_1
MH0003.scaffold3592_1	MH0033.scaffold110687_2
MH0003.scaffold3592_6	MH0067.scaffold4780_3
MH0003.scaffold3592_7	MH0044.scaffold20301_2
MH0003.scaffold36306_1	MH0003.scaffold36306_1
MH0003.scaffold36340_2	V1.CD-9.scaffold75967_2
MH0003.scaffold36571_2	O2.UC-12.scaffold45518_1
MH0003.scaffold36630_5	MH0020.scaffold47302_3
MH0003.scaffold3695_7	MH0074.scaffold4450_7
MH0003.scaffold37414_3	V1.CD-15.scaffold877_8
MH0003.scaffold37517_1	MH0068.scaffold1126_3
MH0003.scaffold37569_1	V1.UC-15.scaffold1913_4
MH0003.scaffold37782_1	MH0003.scaffold37782_1
MH0003.scaffold37789_3	MH0067.scaffold3203_2
MH0003.scaffold37984_2	MH0062.scaffold87339_1
MH0003.scaffold38059_1	MH0003.scaffold38059_1
MH0003.scaffold38223_1	MH0003.scaffold38223_1
MH0003.scaffold3832_3	MH0003.scaffold3832_3
MH0003.scaffold38691_2	O2.UC-23.scaffold21764_6
MH0003.scaffold3899_1	MH0049.scaffold2941_4
MH0003.scaffold39226_1	MH0061.scaffold20944_12
MH0003.scaffold39547_1	MH0085.scaffold37908_6
MH0003.scaffold39547_2	MH0003.scaffold39547_2
MH0003.scaffold39547_3	MH0086.scaffold109528_2
MH0003.scaffold39547_4	MH0086.scaffold109528_2
MH0003.scaffold39547_5	MH0048.scaffold38030_1
MH0003.scaffold39547_6	MH0003.scaffold39547_6
MH0003.scaffold39590_5	V1.UC-15.scaffold20966_1
MH0003.scaffold39742_5	MH0075.scaffold15861_3
MH0003.scaffold39847_5	MH0003.scaffold39847_5
MH0003.scaffold3988_3	O2.UC-11.scaffold13191_3
MH0003.scaffold4008_5	MH0003.scaffold4008_5
MH0003.scaffold40147_2	MH0079.scaffold13068_1
MH0003.scaffold40149_1	MH0003.scaffold40149_1
MH0003.scaffold40149_2	MH0059.scaffold89338_1
MH0003.scaffold40260_1	V1.UC-19.scaffold20285_1
MH0003.scaffold40417_3	V1.CD-3.scaffold10648_4
MH0003.scaffold40466_13	V1.CD-9.scaffold6138_2
MH0003.scaffold40720_1	MH0003.scaffold40720_1
MH0003.scaffold40908_9	MH0003.scaffold40908_9
MH0003.scaffold41127_1	V1.CD-9.scaffold27279_2
MH0003.scaffold4145_1	MH0014.scaffold456_3
MH0003.scaffold42016_1	MH0003.scaffold42016_1
MH0003.scaffold42055_2	MH0021.scaffold71678_1
MH0003.scaffold42154_12	MH0039.scaffold36657_6
MH0003.scaffold42302_5	MH0020.scaffold3307_1
MH0003.scaffold4269_1	O2.UC-11.scaffold2474_1
MH0003.scaffold43487_7	V1.UC-15.scaffold14614_6
MH0003.scaffold43747_1	MH0076.scaffold13228_2
MH0003.scaffold43747_4	MH0052.scaffold2937_1
MH0003.scaffold44335_2	MH0003.scaffold44335_2
MH0003.scaffold44335_3	V1.CD-3.scaffold42804_1
MH0003.scaffold4437_1	MH0012.scaffold122_2
MH0003.scaffold44723_1	MH0003.scaffold44723_1
MH0003.scaffold44723_4	MH0003.scaffold44723_4
MH0003.scaffold4501_1	MH0075.scaffold3831_3
MH0003.scaffold45104_2	MH0003.scaffold45104_2
MH0003.scaffold45612_1	MH0038.scaffold42991_1
MH0003.scaffold45840_2	MH0081.scaffold8741_1
MH0003.scaffold46003_1	MH0049.scaffold198_3
MH0003.scaffold46172_3	MH0003.scaffold46172_3
MH0003.scaffold46172_4	MH0003.scaffold46172_4
MH0003.scaffold46309_2	V1.UC-8.scaffold51666_1
MH0003.scaffold46394_3	MH0086.scaffold81614_1
MH0003.scaffold46419_7	MH0026.scaffold2419_8
MH0003.scaffold46545_4	V1.CD-1.scaffold1709_2
MH0003.scaffold46967_1	MH0048.scaffold15048_1
MH0003.scaffold47083_2	O2.UC-18.scaffold9821_2
MH0003.scaffold47091_2	MH0003.scaffold47091_2
MH0003.scaffold47477_1	MH0067.scaffold50515_1
MH0003.scaffold47746_2	MH0003.scaffold47746_2
MH0003.scaffold477_1	V1.UC-8.scaffold864_2
MH0003.scaffold47_1	V1.CD-15.scaffold45026_1
MH0003.scaffold48142_2	MH0013.scaffold739_4
MH0003.scaffold48268_1	MH0044.scaffold20301_2
MH0003.scaffold48414_2	V1.UC-18.scaffold5708_1
MH0003.scaffold48425_4	MH0080.scaffold1253_1
MH0003.scaffold4872_2	V1.CD-11.scaffold67_8
MH0003.scaffold49165_1	MH0033.scaffold112714_2
MH0003.scaffold49416_3	V1.UC-17.scaffold31426_4
MH0003.scaffold4958_2	MH0003.scaffold4958_2
MH0003.scaffold49711_1	MH0003.scaffold49711_1
MH0003.scaffold50054_3	MH0003.scaffold50054_3
MH0003.scaffold5022_8	MH0074.scaffold22614_1
MH0003.scaffold50480_3	MH0071.scaffold4110_5
MH0003.scaffold5103_2	MH0003.scaffold5103_2
MH0003.scaffold51084_3	MH0003.scaffold51084_3
MH0003.scaffold51245_1	MH0024.scaffold45503_1
MH0003.scaffold51245_2	MH0003.scaffold51245_2
MH0003.scaffold51480_3	MH0003.scaffold51480_3
MH0003.scaffold51584_1	MH0067.scaffold10776_5
MH0003.scaffold51633_2	V1.CD-4.scaffold70383_2
MH0003.scaffold51633_3	V1.CD-4.scaffold70383_2
MH0003.scaffold51633_4	MH0003.scaffold51633_4
MH0003.scaffold51633_5	MH0059.scaffold790_1
MH0003.scaffold51702_3	MH0074.scaffold10277_7
MH0003.scaffold51921_1	MH0003.scaffold51921_1
MH0003.scaffold5218_3	MH0068.scaffold17211_1
MH0003.scaffold52229_2	O2.UC-20.scaffold29958_2
MH0003.scaffold52848_1	MH0003.scaffold52848_1
MH0003.scaffold52870_4	MH0072.scaffold59530_1
MH0003.scaffold52876_3	MH0074.scaffold37439_1
MH0003.scaffold53093_1	V1.UC-6.scaffold11033_15
MH0003.scaffold54048_1	MH0003.scaffold54048_1
MH0003.scaffold54268_8	MH0066.scaffold21116_1
MH0003.scaffold5435_3	MH0002.scaffold12413_1
MH0003.scaffold5435_4	MH0002.scaffold12413_1
MH0003.scaffold5435_6	MH0003.scaffold5435_6
MH0003.scaffold5435_7	MH0002.scaffold12413_1
MH0003.scaffold5435_8	MH0002.scaffold12413_1
MH0003.scaffold54649_1	O2.UC-18.scaffold5739_4
MH0003.scaffold54875_2	O2.UC-22.scaffold43274_1
MH0003.scaffold54875_3	O2.UC-22.scaffold43274_1
MH0003.scaffold54903_2	V1.CD-3.scaffold10648_4
MH0003.scaffold55438_8	MH0004.C1525510_1
MH0003.scaffold56077_6	MH0020.scaffold15460_3
MH0003.scaffold5712_1	MH0003.scaffold5712_1
MH0003.scaffold5773_1	MH0035.scaffold5110_1
MH0003.scaffold5773_2	MH0052.scaffold2937_1
MH0003.scaffold5775_3	O2.UC-18.scaffold4576_3
MH0003.scaffold57842_1	MH0003.scaffold57842_1
MH0003.scaffold57842_2	MH0003.scaffold57842_2
MH0003.scaffold5792_1	MH0003.scaffold5792_1
MH0003.scaffold58038_4	MH0085.scaffold5927_2
MH0003.scaffold58300_1	MH0062.scaffold72116_1
MH0003.scaffold5856_1	MH0003.scaffold5856_1
MH0003.scaffold58779_2	MH0067.scaffold3282_4
MH0003.scaffold58970_4	V1.CD-9.scaffold10682_1
MH0003.scaffold591_1	MH0049.scaffold23756_1
MH0003.scaffold59577_4	V1.CD-3.scaffold10648_4
MH0003.scaffold5957_2	O2.UC-18.scaffold4034_1
MH0003.scaffold595_5	MH0003.scaffold595_5
MH0003.scaffold595_6	MH0003.scaffold595_6
MH0003.scaffold595_9	MH0003.scaffold595_9
MH0003.scaffold59818_2	MH0003.scaffold59818_2
MH0003.scaffold59862_1	MH0065.scaffold347_1
MH0003.scaffold59911_1	V1.UC-19.scaffold20285_1
MH0003.scaffold59926_1	MH0003.scaffold59926_1
MH0003.scaffold60001_2	MH0011.scaffold2228_6
MH0003.scaffold60014_1	MH0062.scaffold74910_2
MH0003.scaffold60126_1	O2.UC-19.scaffold26078_1
MH0003.scaffold60471_6	MH0080.scaffold71948_1
MH0003.scaffold60487_1	V1.CD-6.scaffold2291_2
MH0003.scaffold60578_2	MH0003.scaffold60578_2
MH0003.scaffold61016_1	MH0040.scaffold20215_1
MH0003.scaffold61845_1	MH0003.scaffold61845_1
MH0003.scaffold61981_4	O2.UC-22.scaffold43274_1
MH0003.scaffold62636_1	V1.CD-8.scaffold111064_3
MH0003.scaffold64109_2	MH0003.scaffold64109_2
MH0003.scaffold64207_3	MH0076.scaffold13228_2
MH0003.scaffold64214_3	MH0039.scaffold39177_3
MH0003.scaffold64779_1	MH0003.scaffold64779_1
MH0003.scaffold65013_1	V1.CD-3.scaffold10648_4
MH0003.scaffold6533_1	O2.UC-4.scaffold10489_1
MH0003.scaffold6590_2	MH0037.scaffold63769_1
MH0003.scaffold65994_8	MH0080.scaffold34072_2
MH0003.scaffold66281_1	MH0003.scaffold66281_1
MH0003.scaffold6629_1	MH0085.scaffold3486_1
MH0003.scaffold662_1	V1.UC-18.scaffold14473_5
MH0003.scaffold66417_3	MH0067.scaffold10776_2
MH0003.scaffold66835_2	MH0039.scaffold14107_1
MH0003.scaffold66996_7	MH0011.scaffold92339_2
MH0003.scaffold67075_1	MH0003.scaffold67075_1
MH0003.scaffold67459_3	MH0028.scaffold57702_2
MH0003.scaffold67468_2	V1.UC-6.scaffold23734_16
MH0003.scaffold67489_3	MH0052.scaffold2937_1
MH0003.scaffold67773_2	MH0003.scaffold67773_2
MH0003.scaffold68372_1	MH0003.scaffold68372_1
MH0003.scaffold68453_2	MH0003.scaffold68453_2
MH0003.scaffold68890_1	MH0055.scaffold61741_3
MH0003.scaffold68931_1	MH0064.scaffold6578_10
MH0003.scaffold69088_3	V1.UC-15.scaffold17122_1
MH0003.scaffold69582_1	MH0073.scaffold4555_6
MH0003.scaffold69627_3	MH0028.scaffold43633_1
MH0003.scaffold69703_2	MH0038.scaffold9654_1
MH0003.scaffold70256_1	MH0003.scaffold70256_1
MH0003.scaffold70256_11	MH0003.scaffold70256_11
MH0003.scaffold70256_12	MH0003.scaffold70256_12
MH0003.scaffold70256_4	MH0003.scaffold70256_4
MH0003.scaffold70256_5	MH0003.scaffold70256_5
MH0003.scaffold70256_6	MH0003.scaffold70256_6
MH0003.scaffold70256_9	MH0003.scaffold70256_9
MH0003.scaffold70381_1	MH0072.scaffold16715_2
MH0003.scaffold70453_2	V1.UC-6.scaffold9175_7
MH0003.scaffold7061_1	MH0068.scaffold3523_1
MH0003.scaffold70746_1	O2.UC-13.scaffold61108_1
MH0003.scaffold70783_1	V1.CD-3.scaffold10648_4
MH0003.scaffold70811_1	MH0003.scaffold70811_1
MH0003.scaffold7120_1	MH0003.scaffold7120_1
MH0003.scaffold71501_1	MH0038.scaffold1737_1
MH0003.scaffold71603_2	MH0020.scaffold15386_1
MH0003.scaffold71754_1	MH0068.scaffold8525_3
MH0003.scaffold72098_1	MH0016.scaffold4212_6
MH0003.scaffold72122_4	MH0039.scaffold858_8
MH0003.scaffold72312_1	V1.CD-13.scaffold2166_2
MH0003.scaffold72696_4	V1.UC-19.scaffold3745_4
MH0003.scaffold72737_1	MH0038.scaffold27345_1
MH0003.scaffold7276_1	MH0074.scaffold6996_5
MH0003.scaffold7282_1	MH0065.scaffold13536_3
MH0003.scaffold72958_2	MH0049.scaffold11826_1
MH0003.scaffold7301_2	O2.UC-13.scaffold4164_1
MH0003.scaffold73164_2	O2.UC-22.scaffold43274_2
MH0003.scaffold73431_3	MH0003.scaffold73431_3
MH0003.scaffold734_5	O2.UC-1.scaffold9159_1
MH0003.scaffold73577_2	MH0082.scaffold18170_5
MH0003.scaffold73924_1	MH0033.scaffold16410_2
MH0003.scaffold74095_1	MH0058.scaffold20440_2
MH0003.scaffold74262_1	MH0071.scaffold11541_1
MH0003.scaffold74362_2	MH0050.scaffold54571_2
MH0003.scaffold7441_2	MH0003.scaffold7441_2
MH0003.scaffold75063_1	MH0048.scaffold60709_2
MH0003.scaffold75388_1	O2.UC-12.scaffold24823_2
MH0003.scaffold75568_1	MH0003.scaffold75568_1
MH0003.scaffold75925_1	V1.CD-3.scaffold10648_4
MH0003.scaffold76003_1	O2.UC-23.scaffold43041_2
MH0003.scaffold76100_1	MH0003.scaffold76100_1
MH0003.scaffold76222_3	MH0003.scaffold76222_3
MH0003.scaffold76264_2	MH0067.scaffold3282_1
MH0003.scaffold76289_2	MH0074.scaffold7602_6
MH0003.scaffold76520_1	MH0003.scaffold76520_1
MH0003.scaffold76844_1	MH0003.scaffold76844_1
MH0003.scaffold76965_3	MH0038.scaffold18952_1
MH0003.scaffold77137_2	MH0072.scaffold59530_1
MH0003.scaffold77235_4	MH0003.scaffold77235_4
MH0003.scaffold77282_2	MH0053.scaffold54386_1
MH0003.scaffold77282_3	MH0053.scaffold54386_1
MH0003.scaffold77311_1	MH0044.scaffold1765_5
MH0003.scaffold773_1	MH0058.scaffold20440_2
MH0003.scaffold77675_2	MH0022.scaffold53395_2
MH0003.scaffold77680_1	MH0003.scaffold77680_1
MH0003.scaffold77716_1	MH0042.scaffold111379_2
MH0003.scaffold77828_1	MH0003.scaffold77828_1
MH0003.scaffold77828_2	MH0003.scaffold77828_2
MH0003.scaffold77889_2	MH0012.scaffold118068_3
MH0003.scaffold7806_1	O2.UC-18.scaffold362_10
MH0003.scaffold78072_1	MH0083.scaffold1734_1
MH0003.scaffold78110_1	MH0003.scaffold78110_1
MH0003.scaffold78263_1	V1.UC-15.scaffold26782_3
MH0003.scaffold78346_2	V1.CD-3.scaffold10648_4
MH0003.scaffold78399_1	MH0003.scaffold78399_1
MH0003.scaffold78463_1	MH0003.scaffold78463_1
MH0003.scaffold78463_2	MH0085.scaffold37908_3
MH0003.scaffold78537_1	MH0003.scaffold78537_1
MH0003.scaffold78602_1	MH0003.scaffold78602_1
MH0003.scaffold78602_2	MH0060.scaffold109280_2
MH0003.scaffold78652_1	MH0082.scaffold16597_2
MH0003.scaffold78770_3	V1.CD-1.scaffold299_6
MH0003.scaffold78789_1	V1.CD-3.scaffold10648_4
MH0003.scaffold78849_1	MH0003.scaffold78849_1
MH0003.scaffold78919_1	MH0044.scaffold4270_5
MH0003.scaffold7903_4	MH0085.scaffold5466_5
MH0003.scaffold79210_1	MH0059.scaffold89338_1
MH0003.scaffold79396_1	MH0003.scaffold79396_1
MH0003.scaffold79396_2	MH0003.scaffold79396_2
MH0003.scaffold79438_1	V1.UC-14.scaffold18565_6
MH0003.scaffold79465_3	MH0020.scaffold808_4
MH0003.scaffold79500_1	MH0085.scaffold37908_3
MH0003.scaffold79541_1	MH0003.scaffold79541_1
MH0003.scaffold79574_1	MH0022.scaffold53395_2
MH0003.scaffold79574_2	MH0022.scaffold53395_2
MH0003.scaffold79591_3	O2.UC-4.scaffold4504_1
MH0003.scaffold79627_1	MH0053.scaffold54386_1
MH0003.scaffold79715_1	MH0022.scaffold53395_2
MH0003.scaffold79715_2	MH0053.scaffold54386_1
MH0003.scaffold79731_2	MH0067.scaffold18032_4
MH0003.scaffold79782_1	V1.CD-6.scaffold63937_1
MH0003.scaffold79788_1	MH0030.scaffold29447_1
MH0003.scaffold808_2	MH0061.scaffold31627_1
MH0003.scaffold8181_4	MH0003.scaffold8181_4
MH0003.scaffold8277_1	MH0003.scaffold8277_1
MH0003.scaffold8426_1	MH0026.scaffold166_8
MH0003.scaffold8490_1	MH0003.scaffold8490_1
MH0003.scaffold857_3	MH0044.scaffold5320_6
MH0003.scaffold871_2	O2.UC-12.scaffold730_4
MH0003.scaffold8734_2	MH0033.C3778698_1
MH0003.scaffold8931_1	MH0054.scaffold46345_1
MH0003.scaffold8931_2	MH0085.scaffold708_11
MH0003.scaffold9547_1	MH0003.scaffold9547_1
MH0003.scaffold9621_8	MH0069.scaffold14094_4
MH0003.scaffold994_3	MH0044.scaffold20301_2
MH0003.scaffold9_1	MH0042.scaffold41534_11
MH0004.C1484897_1	MH0067.scaffold13975_4
MH0004.C1487005_1	MH0073.scaffold9943_5
MH0004.C1487047_1	V1.UC-14.scaffold63210_1
MH0004.C1487557_1	MH0072.scaffold59530_1
MH0004.C1487826_1	MH0072.scaffold41495_4
MH0004.C1488352_1	MH0004.C1488352_1
MH0004.C1493014_1	V1.UC-8.scaffold29333_4
MH0004.C1495352_1	MH0003.scaffold45104_2
MH0004.C1495530_1	MH0034.scaffold15675_2
MH0004.C1500626_1	MH0046.scaffold19115_3
MH0004.C1501748_1	MH0003.scaffold4958_2
MH0004.C1502130_1	MH0004.C1502130_1
MH0004.C1503858_1	MH0047.scaffold3775_1
MH0004.C1503978_1	MH0034.scaffold15675_2
MH0004.C1507649_1	MH0002.scaffold95268_1
MH0004.C1508573_1	O2.UC-17.scaffold23957_3
MH0004.C1508633_1	V1.UC-19.scaffold21333_2
MH0004.C1508783_1	MH0030.scaffold35579_1
MH0004.C1509069_1	V1.UC-10.scaffold27570_5
MH0004.C1512802_1	MH0003.scaffold78110_1
MH0004.C1513006_1	V1.CD-15.scaffold34129_1
MH0004.C1514786_1	MH0062.scaffold4938_2
MH0004.C1516178_1	O2.UC-24.scaffold38277_1
MH0004.C1516496_1	MH0004.C1516496_1
MH0004.C1516516_1	MH0039.scaffold69202_2
MH0004.C1517174_1	MH0004.C1517174_1
MH0004.C1517766_1	MH0004.C1517766_1
MH0004.C1517800_1	MH0020.scaffold733_3
MH0004.C1517852_1	O2.UC-24.scaffold321_1
MH0004.C1518128_1	MH0004.C1518128_1
MH0004.C1519392_1	MH0026.scaffold12171_3
MH0004.C1519792_1	MH0077.C4572879_1
MH0004.C1520290_1	MH0034.scaffold15675_2
MH0004.C1521020_1	O2.UC-14.scaffold16042_1
MH0004.C1521460_1	MH0004.C1521460_1
MH0004.C1522170_1	MH0004.C1522170_1
MH0004.C1522260_1	V1.UC-10.scaffold41553_2
MH0004.C1522280_1	MH0003.scaffold78110_1
MH0004.C1522480_1	MH0083.scaffold30524_2
MH0004.C1522612_1	MH0077.C4572879_1
MH0004.C1522648_1	MH0004.C1522648_1
MH0004.C1522652_1	MH0076.scaffold74603_1
MH0004.C1522806_1	MH0003.scaffold70811_1
MH0004.C1523450_1	MH0004.C1523450_1
MH0004.C1523518_1	MH0004.C1523518_1
MH0004.C1523546_1	MH0053.scaffold33670_2
MH0004.C1523614_1	MH0034.scaffold15675_2
MH0004.C1525070_1	MH0033.scaffold13749_1
MH0004.C1525216_1	V1.CD-11.scaffold234_1
MH0004.C1525510_1	MH0004.C1525510_1
MH0004.C1525972_1	V1.CD-14.scaffold56158_1
MH0004.C1526424_1	MH0004.C1526424_1
MH0004.C1526544_1	MH0032.scaffold11044_2
MH0004.C1526780_1	V1.CD-13.scaffold78038_1
MH0004.C1526830_1	O2.UC-20.scaffold85766_1
MH0004.C1526954_1	MH0028.scaffold31498_1
MH0004.C1526968_1	MH0080.scaffold99874_1
MH0004.C1527096_1	MH0049.scaffold6460_1
MH0004.C1527180_1	V1.CD-13.scaffold78038_1
MH0004.scaffold10081_7	MH0070.scaffold102831_1
MH0004.scaffold1033_3	V1.CD-14.scaffold1847_1
MH0004.scaffold10578_1	V1.CD-8.scaffold73879_1
MH0004.scaffold10722_4	MH0022.scaffold53486_1
MH0004.scaffold11383_4	V1.UC-10.scaffold27570_5
MH0004.scaffold11884_2	O2.UC-12.scaffold5769_1
MH0004.scaffold12092_6	MH0086.scaffold10615_2
MH0004.scaffold13423_1	O2.UC-13.scaffold16107_3
MH0004.scaffold13423_3	O2.UC-13.scaffold16107_3
MH0004.scaffold15563_6	MH0004.scaffold15563_6
MH0004.scaffold15563_8	MH0037.scaffold6800_4
MH0004.scaffold15563_9	MH0004.scaffold15563_9
MH0004.scaffold1581_1	V1.UC-15.scaffold1693_5
MH0004.scaffold16185_2	MH0026.scaffold5473_19
MH0004.scaffold16229_2	MH0033.scaffold918_4
MH0004.scaffold16229_4	MH0033.scaffold918_4
MH0004.scaffold16487_2	V1.UC-14.scaffold59732_1
MH0004.scaffold19218_1	MH0004.scaffold19218_1
MH0004.scaffold19218_9	MH0004.scaffold19218_9
MH0004.scaffold21004_2	MH0030.scaffold71712_3
MH0004.scaffold21004_5	MH0004.scaffold21004_5
MH0004.scaffold21004_9	MH0030.scaffold71712_1
MH0004.scaffold21515_1	V1.CD-13.scaffold32065_1
MH0004.scaffold21759_2	O2.UC-24.scaffold92_2
MH0004.scaffold23025_2	MH0004.scaffold23025_2
MH0004.scaffold23408_2	MH0086.scaffold10615_2
MH0004.scaffold25183_6	MH0063.scaffold60155_1
MH0004.scaffold25331_3	MH0072.scaffold59530_1
MH0004.scaffold25474_2	MH0030.scaffold30818_1
MH0004.scaffold26434_4	O2.UC-13.scaffold16107_3
MH0004.scaffold26893_3	O2.UC-24.scaffold8186_4
MH0004.scaffold26923_3	V1.UC-10.scaffold10519_3
MH0004.scaffold27912_4	MH0065.scaffold53251_2
MH0004.scaffold27959_1	MH0057.scaffold18200_2
MH0004.scaffold2799_1	O2.UC-14.scaffold11714_1
MH0004.scaffold28108_4	MH0070.scaffold9906_1
MH0004.scaffold28850_2	O2.UC-14.scaffold1537_3
MH0004.scaffold28938_9	MH0086.scaffold10615_1
MH0004.scaffold30374_4	V1.CD-9.scaffold57847_1
MH0004.scaffold30374_6	V1.CD-9.scaffold57847_2
MH0004.scaffold30569_4	MH0080.scaffold99396_1
MH0004.scaffold30569_6	MH0080.scaffold99396_1
MH0004.scaffold30674_2	MH0004.scaffold30674_2
MH0004.scaffold31758_4	MH0004.scaffold31758_4
MH0004.scaffold31765_1	MH0004.scaffold31765_1
MH0004.scaffold32483_2	MH0059.scaffold26881_8
MH0004.scaffold32584_4	MH0030.scaffold37842_1
MH0004.scaffold32898_4	O2.UC-11.scaffold2912_1
MH0004.scaffold33360_4	MH0030.scaffold67832_2
MH0004.scaffold36797_1	MH0063.scaffold60155_1
MH0004.scaffold37428_2	MH0030.scaffold67832_4
MH0004.scaffold37428_6	MH0030.scaffold67832_3
MH0004.scaffold37683_1	MH0065.scaffold1025_4
MH0004.scaffold37730_3	MH0030.scaffold30818_1
MH0004.scaffold37815_2	MH0009.scaffold10485_1
MH0004.scaffold38088_2	O2.UC-13.scaffold16107_3
MH0004.scaffold38545_6	MH0050.scaffold5063_2
MH0004.scaffold3861_3	MH0004.scaffold3861_3
MH0004.scaffold38788_1	MH0043.scaffold4832_2
MH0004.scaffold39208_1	MH0004.scaffold39208_1
MH0004.scaffold40203_3	MH0005.scaffold38195_1
MH0004.scaffold40203_4	MH0043.scaffold4832_2
MH0004.scaffold40203_5	V1.UC-19.scaffold3239_15
MH0004.scaffold40315_4	V1.CD-3.scaffold25718_1
MH0004.scaffold40554_1	MH0066.scaffold16527_9
MH0004.scaffold40889_1	V1.UC-17.scaffold16340_4
MH0004.scaffold41561_2	MH0063.scaffold60155_1
MH0004.scaffold43041_4	MH0004.scaffold43041_4
MH0004.scaffold43468_1	V1.CD-13.scaffold66292_1
MH0004.scaffold44287_2	V1.CD-13.scaffold46626_1
MH0004.scaffold45041_2	MH0023.scaffold27080_3
MH0004.scaffold4548_5	MH0009.scaffold977_2
MH0004.scaffold4567_1	MH0004.scaffold4567_1
MH0004.scaffold457_1	MH0073.scaffold7952_3
MH0004.scaffold45848_2	O2.UC-24.scaffold1725_1
MH0004.scaffold46207_3	V1.UC-8.scaffold57310_3
MH0004.scaffold46841_2	V1.CD-9.scaffold6217_8
MH0004.scaffold46925_4	MH0026.scaffold5473_19
MH0004.scaffold47657_1	MH0063.C4949003_1
MH0004.scaffold47854_2	MH0034.scaffold3827_8
MH0004.scaffold47900_1	MH0079.scaffold13068_1
MH0004.scaffold48338_3	MH0012.scaffold71622_4
MH0004.scaffold48992_3	MH0061.scaffold9133_1
MH0004.scaffold49822_2	MH0066.scaffold17926_1
MH0004.scaffold51013_2	MH0004.scaffold51013_2
MH0004.scaffold51113_2	MH0086.scaffold10615_6
MH0004.scaffold51113_5	MH0050.scaffold5063_7
MH0004.scaffold51172_2	O2.UC-13.scaffold16107_5
MH0004.scaffold51313_1	V1.UC-13.scaffold17821_2
MH0004.scaffold51381_3	MH0067.scaffold6132_6
MH0004.scaffold51533_1	MH0084.scaffold14921_2
MH0004.scaffold5192_2	MH0077.scaffold93295_1
MH0004.scaffold52085_1	MH0004.scaffold52085_1
MH0004.scaffold52100_1	V1.UC-10.scaffold99399_1
MH0004.scaffold52127_1	MH0004.scaffold52127_1
MH0004.scaffold52593_1	MH0011.scaffold13150_3
MH0004.scaffold52604_1	MH0034.scaffold7657_8
MH0004.scaffold52692_1	MH0004.scaffold52692_1
MH0004.scaffold52883_1	MH0033.scaffold918_4
MH0004.scaffold52923_1	MH0085.scaffold60430_1
MH0004.scaffold52925_1	MH0080.scaffold99874_1
MH0004.scaffold52925_2	MH0004.scaffold52925_2
MH0004.scaffold579_10	MH0070.scaffold102831_1
MH0004.scaffold579_11	MH0070.scaffold102831_1
MH0004.scaffold579_4	MH0070.scaffold102831_1
MH0004.scaffold5841_3	MH0030.scaffold30818_3
MH0004.scaffold5841_5	MH0004.scaffold5841_5
MH0004.scaffold5937_1	MH0004.scaffold5937_1
MH0004.scaffold7243_2	MH0034.scaffold3827_2
MH0004.scaffold7350_7	MH0066.scaffold18508_1
MH0004.scaffold7678_9	MH0017.scaffold16009_6
MH0004.scaffold7920_1	MH0066.scaffold12503_1
MH0004.scaffold8379_2	V1.UC-19.scaffold6148_14
MH0004.scaffold8502_1	MH0006.scaffold320135_1
MH0004.scaffold8502_2	MH0006.scaffold320135_1
MH0004.scaffold8502_3	MH0006.scaffold320135_1
MH0004.scaffold8502_4	MH0006.scaffold320135_1
MH0004.scaffold8502_5	MH0006.scaffold320135_1
MH0004.scaffold9393_8	MH0030.scaffold6134_1
MH0004.scaffold9456_1	MH0004.scaffold9456_1
MH0005.C1171214_1	MH0052.scaffold4295_2
MH0005.C1171950_1	MH0054.scaffold44091_1
MH0005.C1175742_1	MH0005.C1175742_1
MH0005.C1175744_1	V1.UC-21.scaffold18814_2
MH0005.C1176760_1	V1.UC-14.scaffold42449_2
MH0005.C1177634_1	V1.UC-14.scaffold42449_2
MH0005.C1178958_1	MH0017.scaffold39661_1
MH0005.C1183748_1	MH0005.C1183748_1
MH0005.C1185668_1	O2.UC-14.scaffold40005_1
MH0005.C1186136_1	MH0001.C797640_1
MH0005.C1190856_1	MH0005.C1190856_1
MH0005.C1192004_1	MH0031.scaffold12339_4
MH0005.C1193074_1	MH0005.C1193074_1
MH0005.C1193660_1	O2.UC-19.scaffold2500_4
MH0005.C1193860_1	MH0005.C1193860_1
MH0005.scaffold10028_1	MH0005.scaffold10028_1
MH0005.scaffold1134_32	MH0017.scaffold16009_6
MH0005.scaffold11827_4	MH0005.scaffold11827_4
MH0005.scaffold11973_2	MH0054.scaffold3636_5
MH0005.scaffold11973_4	MH0054.scaffold3636_5
MH0005.scaffold1273_1	MH0016.scaffold10808_1
MH0005.scaffold1273_2	MH0016.scaffold10808_1
MH0005.scaffold12927_3	MH0023.scaffold20476_1
MH0005.scaffold13404_7	MH0026.scaffold5473_19
MH0005.scaffold13404_8	MH0026.scaffold5473_19
MH0005.scaffold13404_9	O2.UC-24.scaffold7305_2
MH0005.scaffold13484_10	MH0086.scaffold31644_3
MH0005.scaffold13640_1	MH0016.scaffold10776_12
MH0005.scaffold15531_20	O2.UC-14.scaffold11714_1
MH0005.scaffold15846_3	MH0011.scaffold4532_3
MH0005.scaffold1665_5	O2.UC-24.scaffold6206_1
MH0005.scaffold17194_1	MH0005.scaffold17194_1
MH0005.scaffold18115_2	MH0063.scaffold27816_7
MH0005.scaffold1869_4	MH0055.scaffold82928_1
MH0005.scaffold1869_5	MH0005.scaffold1869_5
MH0005.scaffold19179_3	MH0059.scaffold92151_6
MH0005.scaffold20031_2	MH0005.scaffold20031_2
MH0005.scaffold20158_1	V1.UC-10.scaffold27570_5
MH0005.scaffold210_9	MH0066.scaffold16527_9
MH0005.scaffold2147_1	MH0021.C2090245_1
MH0005.scaffold22054_7	MH0068.scaffold17211_1
MH0005.scaffold23633_6	MH0005.scaffold23633_6
MH0005.scaffold24061_2	MH0043.scaffold13467_4
MH0005.scaffold2421_6	MH0074.scaffold10277_7
MH0005.scaffold24967_1	O2.UC-23.scaffold4156_3
MH0005.scaffold25522_1	MH0083.scaffold10421_5
MH0005.scaffold25619_3	V1.UC-13.scaffold4943_6
MH0005.scaffold26242_1	MH0005.scaffold26242_1
MH0005.scaffold26260_3	V1.UC-7.scaffold3218_3
MH0005.scaffold27160_2	MH0065.scaffold12900_1
MH0005.scaffold27160_3	V1.UC-10.scaffold27570_5
MH0005.scaffold27193_2	O2.UC-16.scaffold11858_3
MH0005.scaffold27308_7	MH0010.scaffold36924_2
MH0005.scaffold28962_4	MH0083.scaffold10421_5
MH0005.scaffold29110_1	MH0052.scaffold12935_1
MH0005.scaffold295_13	MH0061.scaffold9133_1
MH0005.scaffold295_4	MH0014.scaffold29821_4
MH0005.scaffold3009_4	MH0063.scaffold5031_8
MH0005.scaffold30235_1	MH0005.scaffold30235_1
MH0005.scaffold31012_7	MH0065.scaffold53251_2
MH0005.scaffold31387_1	MH0054.scaffold24871_1
MH0005.scaffold31728_1	MH0053.scaffold6313_3
MH0005.scaffold3173_1	MH0005.scaffold3173_1
MH0005.scaffold32027_3	V1.UC-6.scaffold9175_7
MH0005.scaffold32106_5	MH0005.scaffold32106_5
MH0005.scaffold3216_2	V1.CD-13.scaffold36743_2
MH0005.scaffold32434_5	O2.UC-20.scaffold85766_1
MH0005.scaffold33169_2	MH0005.scaffold33169_2
MH0005.scaffold33672_2	MH0006.C14611208_1
MH0005.scaffold33725_6	MH0005.scaffold33725_6
MH0005.scaffold34051_2	MH0034.scaffold4670_3
MH0005.scaffold34390_4	MH0065.scaffold1854_4
MH0005.scaffold34526_1	V1.CD-14.scaffold4806_1
MH0005.scaffold3458_11	O2.UC-14.scaffold927_1
MH0005.scaffold35742_1	MH0068.scaffold17211_1
MH0005.scaffold35976_2	MH0014.scaffold21166_5
MH0005.scaffold36077_4	MH0005.scaffold36077_4
MH0005.scaffold37010_1	MH0005.scaffold37010_1
MH0005.scaffold37030_1	MH0005.scaffold37030_1
MH0005.scaffold37067_3	MH0005.scaffold37067_3
MH0005.scaffold3711_3	MH0016.scaffold10808_2
MH0005.scaffold37475_1	MH0082.scaffold18170_5
MH0005.scaffold37973_2	MH0030.scaffold70000_1
MH0005.scaffold38195_1	MH0005.scaffold38195_1
MH0005.scaffold38370_1	O2.UC-19.scaffold74061_3
MH0005.scaffold38559_1	V1.UC-8.scaffold6779_11
MH0005.scaffold38726_1	O2.UC-24.scaffold3061_1
MH0005.scaffold38978_1	MH0005.scaffold38978_1
MH0005.scaffold4017_5	MH0005.scaffold4017_5
MH0005.scaffold4137_14	MH0001.scaffold17887_2
MH0005.scaffold4151_1	MH0005.scaffold4151_1
MH0005.scaffold4151_5	MH0049.scaffold404_3
MH0005.scaffold4151_7	MH0005.scaffold4151_7
MH0005.scaffold4874_31	MH0046.scaffold33286_1
MH0005.scaffold5357_3	MH0016.scaffold10808_1
MH0005.scaffold5918_5	MH0039.scaffold59256_7
MH0005.scaffold6017_10	MH0005.scaffold6017_10
MH0005.scaffold6017_5	O2.UC-13.scaffold16107_3
MH0005.scaffold6017_7	O2.UC-13.scaffold16107_3
MH0005.scaffold6494_4	O2.UC-18.scaffold2699_1
MH0005.scaffold6832_5	MH0005.scaffold6832_5
MH0005.scaffold6906_3	MH0005.scaffold6906_3
MH0005.scaffold7223_6	MH0001.scaffold22042_1
MH0005.scaffold731_1	MH0014.scaffold55358_2
MH0005.scaffold731_10	MH0035.scaffold35549_2
MH0005.scaffold731_24	MH0054.scaffold943_20
MH0005.scaffold731_26	MH0054.scaffold943_20
MH0005.scaffold731_5	MH0036.scaffold14124_7
MH0005.scaffold731_6	MH0036.scaffold14124_7
MH0005.scaffold7364_3	MH0038.scaffold52437_1
MH0005.scaffold7490_5	MH0005.scaffold7490_5
MH0005.scaffold7620_9	MH0020.scaffold18411_2
MH0005.scaffold7713_5	MH0068.scaffold17211_1
MH0005.scaffold8342_4	MH0014.scaffold19111_4
MH0005.scaffold9014_1	MH0005.scaffold9014_1
MH0005.scaffold9438_18	MH0045.scaffold16782_10
MH0005.scaffold9438_19	MH0005.scaffold9438_19
MH0005.scaffold9438_20	MH0045.scaffold16782_10
MH0005.scaffold9438_21	MH0045.scaffold16782_10
MH0005.scaffold9438_22	MH0032.scaffold5582_23
MH0005.scaffold9438_23	MH0032.scaffold5582_23
MH0005.scaffold9438_4	MH0045.scaffold16782_15
MH0005.scaffold9529_1	MH0005.scaffold9529_1
MH0005.scaffold9672_2	V1.UC-6.scaffold9175_7
MH0005.scaffold9918_6	MH0065.scaffold1025_4
MH0006.C14376897_1	MH0085.scaffold263_3
MH0006.C14378027_1	MH0006.C14378027_1
MH0006.C14383051_1	V1.UC-21.scaffold33309_1
MH0006.C14385313_1	V1.UC-21.scaffold13160_2
MH0006.C14388549_1	V1.UC-10.scaffold10519_3
MH0006.C14390507_1	MH0075.scaffold95490_1
MH0006.C14390865_1	V1.UC-21.scaffold27073_1
MH0006.C14397327_1	MH0041.scaffold20083_1
MH0006.C14398211_1	O2.UC-13.scaffold5413_4
MH0006.C14400971_1	V1.UC-6.scaffold9175_7
MH0006.C14402343_1	MH0025.scaffold7631_2
MH0006.C14413319_1	MH0086.scaffold31644_2
MH0006.C14416075_1	MH0006.C14416075_1
MH0006.C14420463_1	MH0032.scaffold1671_5
MH0006.C14425268_1	MH0039.scaffold21727_1
MH0006.C14432004_1	MH0062.scaffold34683_1
MH0006.C14434284_1	MH0028.scaffold8031_11
MH0006.C14441574_1	V1.UC-18.scaffold37989_3
MH0006.C14446552_1	MH0006.C14446552_1
MH0006.C14455077_1	MH0043.scaffold33133_9
MH0006.C14456081_1	MH0012.scaffold70610_4
MH0006.C14463499_1	MH0012.scaffold15657_2
MH0006.C14468451_1	MH0012.scaffold71622_4
MH0006.C14477214_1	MH0006.C14477214_1
MH0006.C14481230_1	MH0006.C14481230_1
MH0006.C14483620_1	MH0050.scaffold7168_1
MH0006.C14493300_1	V1.UC-14.scaffold76742_2
MH0006.C14496818_1	V1.UC-14.scaffold34724_1
MH0006.C14499760_1	V1.UC-14.scaffold56426_1
MH0006.C14506386_1	MH0051.scaffold35876_3
MH0006.C14516198_1	V1.UC-19.scaffold86581_3
MH0006.C14522023_1	MH0006.C14522023_1
MH0006.C14533995_1	MH0006.C14533995_1
MH0006.C14536241_1	MH0083.scaffold20205_8
MH0006.C14537749_1	V1.UC-14.scaffold56426_1
MH0006.C14541949_1	MH0009.scaffold28895_2
MH0006.C14545305_1	MH0006.C14545305_1
MH0006.C14545575_1	MH0025.scaffold42567_1
MH0006.C14547805_1	V1.CD-13.scaffold36743_2
MH0006.C14547813_1	MH0070.scaffold110072_1
MH0006.C14548239_1	MH0083.scaffold59817_1
MH0006.C14551497_1	O2.UC-4.scaffold1030_1
MH0006.C14551897_1	MH0074.scaffold7416_5
MH0006.C14555218_1	V1.UC-21.scaffold27073_1
MH0006.C14556432_1	MH0050.scaffold7168_1
MH0006.C14560818_1	MH0026.scaffold2419_8
MH0006.C14561756_1	MH0026.scaffold508_2
MH0006.C14562254_1	V1.CD-4.scaffold5516_2
MH0006.C14565782_1	O2.UC-1.scaffold8918_1
MH0006.C14569276_1	V1.UC-14.scaffold28509_2
MH0006.C14570870_1	MH0036.scaffold14124_7
MH0006.C14571298_1	MH0006.C14571298_1
MH0006.C14571876_1	MH0006.C14571876_1
MH0006.C14576484_1	MH0006.C14576484_1
MH0006.C14581931_1	MH0085.scaffold11350_4
MH0006.C14587185_1	MH0067.scaffold50515_1
MH0006.C14588799_1	V1.UC-21.scaffold27073_1
MH0006.C14591573_1	V1.UC-14.scaffold56426_1
MH0006.C14591677_1	MH0006.C14591677_1
MH0006.C14592427_1	V1.UC-18.scaffold71309_1
MH0006.C14597069_1	MH0006.C14597069_1
MH0006.C14603323_1	MH0006.C14603323_1
MH0006.C14608114_1	O2.UC-13.scaffold13650_3
MH0006.C14610938_1	MH0067.scaffold50515_1
MH0006.C14611208_1	MH0006.C14611208_1
MH0006.C14614680_1	MH0040.scaffold105584_1
MH0006.C14616516_1	MH0050.scaffold7168_1
MH0006.C14620018_1	MH0059.scaffold92151_6
MH0006.C14623434_1	MH0049.scaffold2941_4
MH0006.C14624344_1	MH0084.scaffold6207_1
MH0006.C14644038_1	O2.UC-4.scaffold2007_1
MH0006.C14645916_1	MH0038.scaffold5890_3
MH0006.C14648182_1	MH0053.scaffold82586_1
MH0006.C14648990_1	MH0006.C14648990_1
MH0006.C14649446_1	O2.UC-14.scaffold40005_1
MH0006.C14650014_1	MH0086.scaffold542_4
MH0006.C14652156_1	O2.UC-19.scaffold74061_3
MH0006.C14652612_1	MH0009.scaffold2619_7
MH0006.C14656660_1	MH0049.scaffold6358_2
MH0006.C14660464_1	MH0049.scaffold6358_2
MH0006.C14660474_1	V1.CD-11.scaffold59865_1
MH0006.C14660974_1	MH0006.C14660974_1
MH0006.C14661044_1	MH0006.C14661044_1
MH0006.C14662458_1	MH0006.C14662458_1
MH0006.scaffold10184_19	V1.CD-15.scaffold24171_1
MH0006.scaffold101948_1	MH0016.scaffold32607_3
MH0006.scaffold102385_5	V1.UC-19.scaffold49505_1
MH0006.scaffold10241_1	MH0066.scaffold17926_1
MH0006.scaffold102645_5	V1.UC-15.scaffold20966_1
MH0006.scaffold10302_1	MH0006.scaffold10302_1
MH0006.scaffold103071_2	MH0080.scaffold23991_1
MH0006.scaffold103733_3	MH0060.scaffold32041_2
MH0006.scaffold104778_1	MH0083.scaffold1988_10
MH0006.scaffold105077_1	MH0086.scaffold27976_1
MH0006.scaffold105077_2	MH0038.scaffold5890_2
MH0006.scaffold105077_3	MH0038.scaffold5890_2
MH0006.scaffold105077_4	MH0038.scaffold5890_3
MH0006.scaffold105275_1	V1.UC-13.scaffold5061_3
MH0006.scaffold105333_2	MH0074.scaffold1419_3
MH0006.scaffold105720_1	V1.UC-7.scaffold50299_2
MH0006.scaffold106804_2	MH0020.scaffold10237_1
MH0006.scaffold1076_1	MH0006.scaffold1076_1
MH0006.scaffold107929_1	MH0006.scaffold107929_1
MH0006.scaffold108388_1	MH0086.scaffold10615_2
MH0006.scaffold110185_4	MH0060.scaffold7806_2
MH0006.scaffold111050_4	MH0068.scaffold17078_3
MH0006.scaffold111050_9	MH0068.scaffold17078_3
MH0006.scaffold111833_1	V1.UC-21.scaffold29240_1
MH0006.scaffold11346_3	MH0044.scaffold15776_2
MH0006.scaffold114317_1	MH0006.scaffold114317_1
MH0006.scaffold11454_1	MH0006.scaffold11454_1
MH0006.scaffold11494_1	MH0050.scaffold7168_1
MH0006.scaffold115042_1	MH0083.scaffold10421_2
MH0006.scaffold1166_11	MH0006.scaffold1166_11
MH0006.scaffold1166_5	MH0006.scaffold1166_5
MH0006.scaffold1166_6	MH0006.scaffold1166_6
MH0006.scaffold1166_8	MH0006.scaffold1166_8
MH0006.scaffold116713_4	V1.UC-7.scaffold4461_2
MH0006.scaffold118257_1	MH0006.scaffold118257_1
MH0006.scaffold119673_1	MH0006.scaffold119673_1
MH0006.scaffold119684_1	MH0006.scaffold119684_1
MH0006.scaffold119822_1	MH0006.scaffold119822_1
MH0006.scaffold119865_1	MH0035.scaffold5110_1
MH0006.scaffold120649_1	MH0006.scaffold120649_1
MH0006.scaffold121185_7	V1.UC-15.scaffold14614_6
MH0006.scaffold12408_6	MH0006.scaffold12408_6
MH0006.scaffold125184_2	MH0035.scaffold5110_1
MH0006.scaffold125441_3	MH0006.scaffold125441_3
MH0006.scaffold125701_4	MH0062.scaffold24884_2
MH0006.scaffold125915_8	MH0014.scaffold16636_6
MH0006.scaffold12593_1	MH0061.scaffold6971_2
MH0006.scaffold12642_2	MH0086.scaffold31644_2
MH0006.scaffold1270_4	MH0006.scaffold1270_4
MH0006.scaffold127202_2	MH0006.scaffold127202_2
MH0006.scaffold12915_2	MH0003.scaffold5435_6
MH0006.scaffold129342_1	MH0006.scaffold129342_1
MH0006.scaffold129699_1	MH0024.scaffold17165_1
MH0006.scaffold13069_1	O2.UC-4.scaffold611_1
MH0006.scaffold1313_7	MH0009.scaffold6540_5
MH0006.scaffold132323_5	V1.UC-7.scaffold4461_2
MH0006.scaffold132754_1	MH0004.scaffold31758_4
MH0006.scaffold133329_2	MH0006.scaffold133329_2
MH0006.scaffold133641_1	MH0006.scaffold133641_1
MH0006.scaffold134498_1	MH0001.scaffold21829_1
MH0006.scaffold134601_2	MH0006.scaffold134601_2
MH0006.scaffold134601_3	MH0006.scaffold134601_3
MH0006.scaffold135631_1	O2.UC-24.scaffold7305_2
MH0006.scaffold135761_7	MH0006.scaffold135761_7
MH0006.scaffold13599_2	MH0030.scaffold2277_2
MH0006.scaffold136184_5	MH0038.scaffold9654_1
MH0006.scaffold136642_1	V1.CD-11.scaffold33189_1
MH0006.scaffold136791_2	V1.UC-15.scaffold956_2
MH0006.scaffold137622_3	MH0045.scaffold16782_10
MH0006.scaffold1377_1	MH0078.scaffold21154_1
MH0006.scaffold137989_8	MH0038.scaffold27345_1
MH0006.scaffold138135_1	MH0010.scaffold38207_1
MH0006.scaffold13854_1	MH0062.scaffold9893_2
MH0006.scaffold139252_2	MH0026.scaffold2466_2
MH0006.scaffold139675_1	MH0028.scaffold16481_1
MH0006.scaffold140238_1	MH0028.scaffold22329_3
MH0006.scaffold142028_2	MH0037.scaffold46033_2
MH0006.scaffold142190_5	MH0006.scaffold142190_5
MH0006.scaffold142364_1	MH0006.scaffold142364_1
MH0006.scaffold142492_3	MH0006.scaffold142492_3
MH0006.scaffold142561_2	MH0006.scaffold142561_2
MH0006.scaffold14280_1	MH0086.scaffold31644_3
MH0006.scaffold14280_2	MH0086.scaffold31644_3
MH0006.scaffold142849_9	MH0068.scaffold1325_3
MH0006.scaffold143587_1	V1.CD-9.scaffold10682_1
MH0006.scaffold144427_1	MH0070.scaffold26078_1
MH0006.scaffold144452_6	V1.CD-15.scaffold9230_4
MH0006.scaffold144779_1	V1.CD-13.scaffold36743_2
MH0006.scaffold14536_2	V1.UC-15.scaffold508_3
MH0006.scaffold146987_1	V1.UC-13.scaffold21235_1
MH0006.scaffold147306_22	MH0006.scaffold147306_22
MH0006.scaffold147746_1	MH0020.scaffold20908_20
MH0006.scaffold147896_1	MH0006.scaffold147896_1
MH0006.scaffold148194_1	MH0006.scaffold148194_1
MH0006.scaffold148239_1	MH0067.scaffold17529_1
MH0006.scaffold148529_5	MH0006.scaffold148529_5
MH0006.scaffold149207_1	MH0058.scaffold19676_1
MH0006.scaffold149413_1	MH0006.scaffold149413_1
MH0006.scaffold150116_1	V1.UC-7.scaffold4461_2
MH0006.scaffold150995_2	V1.CD-4.scaffold17511_6
MH0006.scaffold151087_1	V1.UC-8.C3987466_1
MH0006.scaffold151266_8	MH0006.scaffold151266_8
MH0006.scaffold151392_1	V1.UC-14.scaffold65404_3
MH0006.scaffold151808_2	MH0038.scaffold4663_2
MH0006.scaffold15201_1	MH0053.scaffold54386_1
MH0006.scaffold15201_2	O2.UC-4.scaffold4504_1
MH0006.scaffold152433_1	MH0006.scaffold152433_1
MH0006.scaffold15248_2	MH0006.scaffold15248_2
MH0006.scaffold153051_1	MH0044.scaffold32213_2
MH0006.scaffold153564_1	MH0006.scaffold153564_1
MH0006.scaffold153590_1	MH0026.scaffold1235_10
MH0006.scaffold153590_2	MH0050.scaffold7168_1
MH0006.scaffold1544_3	MH0006.scaffold1544_3
MH0006.scaffold154537_1	MH0041.scaffold11898_1
MH0006.scaffold15517_12	MH0012.scaffold7821_9
MH0006.scaffold15517_24	MH0012.scaffold7821_10
MH0006.scaffold155326_4	V1.CD-1.scaffold2304_3
MH0006.scaffold155339_1	V1.UC-8.scaffold6779_11
MH0006.scaffold155362_1	MH0071.scaffold5909_7
MH0006.scaffold156809_1	V1.UC-19.scaffold29615_3
MH0006.scaffold156809_7	MH0020.scaffold12218_1
MH0006.scaffold157502_1	O2.UC-14.scaffold1279_3
MH0006.scaffold157843_1	MH0072.scaffold1390_5
MH0006.scaffold157879_10	MH0038.scaffold9654_1
MH0006.scaffold157879_11	MH0038.scaffold9654_1
MH0006.scaffold158513_1	MH0034.scaffold4448_2
MH0006.scaffold158574_3	MH0053.scaffold54386_1
MH0006.scaffold159064_1	MH0074.scaffold3911_3
MH0006.scaffold159613_1	MH0083.scaffold49199_3
MH0006.scaffold161234_3	MH0037.scaffold46033_2
MH0006.scaffold161833_1	MH0012.scaffold25695_1
MH0006.scaffold162312_1	MH0006.scaffold162312_1
MH0006.scaffold162347_1	V1.UC-21.scaffold8846_7
MH0006.scaffold162416_1	MH0006.scaffold162416_1
MH0006.scaffold162419_3	MH0006.scaffold162419_3
MH0006.scaffold162990_16	MH0069.scaffold60368_1
MH0006.scaffold163495_1	MH0070.scaffold110401_1
MH0006.scaffold164379_1	MH0066.scaffold53369_2
MH0006.scaffold164379_2	MH0006.scaffold164379_2
MH0006.scaffold164379_4	MH0083.scaffold75842_1
MH0006.scaffold164379_6	O2.UC-13.scaffold34538_1
MH0006.scaffold164379_7	MH0066.scaffold39214_1
MH0006.scaffold16533_1	V1.CD-11.scaffold9648_3
MH0006.scaffold165661_1	MH0071.scaffold9571_7
MH0006.scaffold16605_1	MH0053.scaffold54386_1
MH0006.scaffold166382_3	MH0032.scaffold1671_5
MH0006.scaffold166561_5	V1.UC-7.scaffold4461_2
MH0006.scaffold167301_1	V1.CD-1.scaffold1709_1
MH0006.scaffold168199_1	O2.UC-11.scaffold32059_2
MH0006.scaffold169375_1	MH0006.scaffold169375_1
MH0006.scaffold169555_2	MH0006.scaffold169555_2
MH0006.scaffold17002_4	MH0006.scaffold17002_4
MH0006.scaffold171928_1	MH0083.scaffold10421_5
MH0006.scaffold171974_3	MH0065.scaffold5171_3
MH0006.scaffold172633_1	MH0057.scaffold4866_15
MH0006.scaffold172730_3	MH0059.scaffold790_1
MH0006.scaffold173729_1	MH0006.scaffold173729_1
MH0006.scaffold17454_2	MH0006.scaffold17454_2
MH0006.scaffold175059_1	MH0079.scaffold36118_3
MH0006.scaffold176230_1	MH0016.scaffold31583_2
MH0006.scaffold176312_1	MH0058.scaffold20440_2
MH0006.scaffold177506_6	MH0045.scaffold187_18
MH0006.scaffold177506_7	V1.UC-18.scaffold52555_1
MH0006.scaffold177734_1	MH0006.scaffold177734_1
MH0006.scaffold178380_1	MH0006.scaffold178380_1
MH0006.scaffold178429_4	MH0020.scaffold2087_3
MH0006.scaffold178640_1	MH0061.scaffold9999_2
MH0006.scaffold179293_1	MH0053.scaffold100369_1
MH0006.scaffold180787_3	MH0006.scaffold180787_3
MH0006.scaffold181156_2	O2.UC-24.scaffold321_1
MH0006.scaffold181988_2	MH0006.scaffold181988_2
MH0006.scaffold182119_4	V1.CD-8.scaffold9515_1
MH0006.scaffold184753_2	MH0006.scaffold184753_2
MH0006.scaffold184753_3	MH0006.scaffold184753_3
MH0006.scaffold184753_4	MH0006.scaffold184753_4
MH0006.scaffold184753_7	MH0006.scaffold184753_7
MH0006.scaffold184753_9	MH0006.scaffold184753_9
MH0006.scaffold18520_1	MH0014.scaffold32723_1
MH0006.scaffold185577_5	MH0007.C1976274_1
MH0006.scaffold186983_6	V1.CD-15.scaffold27065_1
MH0006.scaffold187433_1	MH0026.scaffold1235_10
MH0006.scaffold18757_3	MH0035.scaffold674_2
MH0006.scaffold188222_4	V1.CD-9.scaffold6138_2
MH0006.scaffold188269_2	V1.CD-4.scaffold92930_1
MH0006.scaffold189087_1	MH0006.scaffold189087_1
MH0006.scaffold189496_2	MH0063.scaffold25206_1
MH0006.scaffold18994_1	O2.UC-13.scaffold16107_3
MH0006.scaffold18994_2	O2.UC-13.scaffold16107_3
MH0006.scaffold190086_1	V1.UC-13.scaffold2246_3
MH0006.scaffold190631_1	MH0037.scaffold326_8
MH0006.scaffold191085_3	MH0083.scaffold83942_1
MH0006.scaffold194782_7	MH0006.scaffold194782_7
MH0006.scaffold195411_8	MH0006.scaffold195411_8
MH0006.scaffold196746_1	MH0011.scaffold80651_2
MH0006.scaffold196865_2	O2.UC-17.scaffold1986_3
MH0006.scaffold197222_2	MH0051.scaffold30001_1
MH0006.scaffold198435_1	MH0018.scaffold29023_1
MH0006.scaffold199566_5	V1.CD-1.scaffold1709_2
MH0006.scaffold200331_1	MH0001.scaffold21829_1
MH0006.scaffold200331_2	MH0001.scaffold21829_1
MH0006.scaffold20206_17	MH0006.scaffold20206_17
MH0006.scaffold202236_2	MH0008.C1728494_1
MH0006.scaffold20259_1	MH0006.scaffold20259_1
MH0006.scaffold203059_1	MH0006.scaffold203059_1
MH0006.scaffold204421_1	MH0006.scaffold204421_1
MH0006.scaffold204903_3	MH0006.scaffold204903_3
MH0006.scaffold20517_1	MH0061.scaffold9133_1
MH0006.scaffold20622_1	MH0006.scaffold20622_1
MH0006.scaffold206408_4	V1.UC-15.scaffold9921_9
MH0006.scaffold20685_3	MH0037.scaffold40093_2
MH0006.scaffold207160_1	V1.UC-13.scaffold34908_1
MH0006.scaffold207412_4	V1.UC-9.scaffold2780_6
MH0006.scaffold209720_1	O2.UC-24.C5411470_1
MH0006.scaffold210266_1	O2.UC-20.scaffold48962_1
MH0006.scaffold210674_2	V1.CD-11.scaffold38611_1
MH0006.scaffold210674_7	V1.CD-11.scaffold38611_1
MH0006.scaffold211381_1	MH0006.scaffold211381_1
MH0006.scaffold211952_1	MH0067.scaffold10776_2
MH0006.scaffold212103_1	MH0006.scaffold212103_1
MH0006.scaffold212274_1	MH0006.scaffold212274_1
MH0006.scaffold212274_10	MH0006.scaffold212274_10
MH0006.scaffold212274_2	O2.UC-11.scaffold38177_2
MH0006.scaffold212274_9	MH0011.scaffold106636_2
MH0006.scaffold212661_1	V1.UC-14.scaffold88999_1
MH0006.scaffold215554_2	MH0006.scaffold215554_2
MH0006.scaffold215781_10	MH0086.scaffold6468_6
MH0006.scaffold215781_3	MH0086.scaffold6468_6
MH0006.scaffold216848_1	V1.UC-8.scaffold1644_1
MH0006.scaffold21816_2	MH0006.scaffold21816_2
MH0006.scaffold219329_4	MH0006.scaffold219329_4
MH0006.scaffold219329_6	MH0006.scaffold219329_6
MH0006.scaffold220014_1	MH0037.scaffold77885_1
MH0006.scaffold220551_3	MH0006.scaffold220551_3
MH0006.scaffold221244_1	MH0010.scaffold14921_2
MH0006.scaffold221244_2	MH0082.scaffold27904_2
MH0006.scaffold221731_2	MH0006.scaffold221731_2
MH0006.scaffold222297_1	MH0086.scaffold27976_1
MH0006.scaffold2225_1	MH0002.scaffold12413_1
MH0006.scaffold2225_2	MH0006.scaffold2225_2
MH0006.scaffold2225_3	MH0002.scaffold12413_1
MH0006.scaffold2225_4	MH0002.scaffold12413_1
MH0006.scaffold223764_2	MH0072.scaffold946_7
MH0006.scaffold224892_2	MH0006.scaffold224892_2
MH0006.scaffold224892_6	O2.UC-11.scaffold29815_4
MH0006.scaffold22749_1	MH0020.scaffold7895_2
MH0006.scaffold22811_2	MH0006.scaffold22811_2
MH0006.scaffold228641_1	V1.CD-11.scaffold67_8
MH0006.scaffold228754_1	MH0040.scaffold62664_1
MH0006.scaffold228754_2	MH0040.scaffold62664_1
MH0006.scaffold228865_1	MH0006.scaffold228865_1
MH0006.scaffold229276_2	MH0067.scaffold10776_2
MH0006.scaffold229484_2	MH0006.scaffold229484_2
MH0006.scaffold229852_1	MH0006.scaffold229852_1
MH0006.scaffold23003_1	V1.CD-8.scaffold915_2
MH0006.scaffold23003_3	MH0006.scaffold23003_3
MH0006.scaffold230884_1	V1.CD-9.scaffold2213_1
MH0006.scaffold232062_2	MH0006.scaffold232062_2
MH0006.scaffold232700_2	MH0012.scaffold32844_5
MH0006.scaffold233465_3	MH0038.scaffold35814_8
MH0006.scaffold234033_4	MH0006.scaffold234033_4
MH0006.scaffold234127_2	MH0006.scaffold234127_2
MH0006.scaffold23569_2	V1.UC-15.scaffold1913_4
MH0006.scaffold23645_6	V1.UC-15.scaffold37293_1
MH0006.scaffold23708_1	MH0039.scaffold21727_1
MH0006.scaffold237509_1	MH0039.scaffold21727_1
MH0006.scaffold237609_2	O2.UC-13.scaffold31021_2
MH0006.scaffold237609_3	O2.UC-13.scaffold31021_2
MH0006.scaffold237609_4	MH0006.scaffold237609_4
MH0006.scaffold239058_1	O2.UC-22.scaffold18247_2
MH0006.scaffold239405_1	V1.CD-13.scaffold85137_4
MH0006.scaffold239997_2	MH0043.scaffold13467_4
MH0006.scaffold240670_3	MH0006.scaffold240670_3
MH0006.scaffold240826_2	O2.UC-13.scaffold31021_2
MH0006.scaffold240991_5	MH0006.scaffold240991_5
MH0006.scaffold241299_1	V1.UC-14.scaffold56426_1
MH0006.scaffold241793_2	MH0006.scaffold241793_2
MH0006.scaffold242407_2	MH0074.scaffold17369_2
MH0006.scaffold243084_1	MH0006.scaffold243084_1
MH0006.scaffold243505_1	O2.UC-23.scaffold43041_2
MH0006.scaffold245228_11	V1.UC-21.scaffold33309_1
MH0006.scaffold245228_12	V1.CD-15.scaffold235_2
MH0006.scaffold245228_13	V1.CD-15.scaffold235_2
MH0006.scaffold245228_14	V1.CD-15.scaffold235_2
MH0006.scaffold245228_2	MH0006.scaffold245228_2
MH0006.scaffold245228_3	V1.CD-15.scaffold235_3
MH0006.scaffold245228_4	MH0006.scaffold245228_4
MH0006.scaffold245228_6	V1.UC-21.scaffold33309_2
MH0006.scaffold245228_9	MH0006.scaffold245228_9
MH0006.scaffold245307_2	MH0065.scaffold85454_3
MH0006.scaffold2468_2	V1.CD-14.scaffold3435_1
MH0006.scaffold24716_1	MH0045.scaffold41638_1
MH0006.scaffold248109_2	MH0044.scaffold20301_2
MH0006.scaffold249166_2	MH0006.scaffold249166_2
MH0006.scaffold251615_1	MH0006.scaffold251615_1
MH0006.scaffold253056_1	V1.CD-3.scaffold10648_4
MH0006.scaffold254792_2	V1.CD-12.scaffold15316_2
MH0006.scaffold255016_1	MH0061.scaffold3871_14
MH0006.scaffold25533_2	MH0006.scaffold25533_2
MH0006.scaffold255369_1	MH0006.scaffold255369_1
MH0006.scaffold256169_2	MH0006.scaffold256169_2
MH0006.scaffold25638_1	MH0054.scaffold3636_5
MH0006.scaffold256638_2	MH0006.scaffold256638_2
MH0006.scaffold256852_1	MH0061.scaffold7018_3
MH0006.scaffold258506_8	MH0006.scaffold258506_8
MH0006.scaffold258506_9	MH0006.scaffold258506_9
MH0006.scaffold260042_1	O2.UC-18.scaffold192_7
MH0006.scaffold260066_3	MH0055.scaffold5797_2
MH0006.scaffold261116_1	MH0058.scaffold20440_2
MH0006.scaffold263848_1	MH0046.scaffold3519_2
MH0006.scaffold264355_1	MH0006.scaffold264355_1
MH0006.scaffold264544_1	MH0006.scaffold264544_1
MH0006.scaffold264544_3	MH0006.scaffold264544_3
MH0006.scaffold264544_4	MH0006.scaffold264544_4
MH0006.scaffold264544_5	MH0006.scaffold264544_5
MH0006.scaffold266777_1	MH0009.scaffold10152_2
MH0006.scaffold267261_1	V1.UC-13.scaffold12584_16
MH0006.scaffold267716_1	V1.UC-8.scaffold26050_10
MH0006.scaffold268011_1	V1.CD-13.scaffold36743_2
MH0006.scaffold268488_1	MH0049.scaffold625_1
MH0006.scaffold268995_1	MH0086.scaffold10615_2
MH0006.scaffold26963_2	MH0063.scaffold13667_4
MH0006.scaffold269833_1	MH0044.scaffold390_2
MH0006.scaffold27005_2	MH0006.scaffold27005_2
MH0006.scaffold27005_5	MH0006.scaffold27005_5
MH0006.scaffold270532_1	MH0036.scaffold83792_1
MH0006.scaffold27125_1	MH0006.scaffold27125_1
MH0006.scaffold271914_4	MH0006.scaffold271914_4
MH0006.scaffold272291_1	MH0046.scaffold81544_2
MH0006.scaffold27246_3	MH0028.scaffold57702_2
MH0006.scaffold272619_1	MH0032.scaffold1671_5
MH0006.scaffold273047_1	MH0085.scaffold1873_1
MH0006.scaffold27363_4	V1.CD-8.scaffold79650_2
MH0006.scaffold27363_7	V1.UC-15.scaffold2406_2
MH0006.scaffold274718_1	MH0006.scaffold274718_1
MH0006.scaffold275080_1	MH0006.scaffold275080_1
MH0006.scaffold275379_2	MH0068.scaffold28468_2
MH0006.scaffold276491_1	MH0006.scaffold276491_1
MH0006.scaffold276864_3	V1.CD-15.scaffold21233_1
MH0006.scaffold277706_2	O2.UC-12.scaffold6398_1
MH0006.scaffold277727_1	O2.UC-18.scaffold2699_1
MH0006.scaffold277867_1	MH0006.scaffold277867_1
MH0006.scaffold278145_3	V1.UC-7.scaffold4461_2
MH0006.scaffold278145_4	V1.UC-7.scaffold4461_2
MH0006.scaffold278145_5	V1.UC-7.scaffold4461_2
MH0006.scaffold278188_1	MH0003.scaffold3832_3
MH0006.scaffold278272_1	MH0074.scaffold10277_7
MH0006.scaffold278321_1	MH0072.scaffold11546_1
MH0006.scaffold278321_2	MH0006.scaffold278321_2
MH0006.scaffold278935_1	MH0049.scaffold11826_1
MH0006.scaffold279148_1	MH0039.scaffold69202_2
MH0006.scaffold27918_4	MH0006.scaffold27918_4
MH0006.scaffold279755_1	O2.UC-12.scaffold730_4
MH0006.scaffold280677_1	MH0006.scaffold280677_1
MH0006.scaffold281487_1	V1.UC-21.scaffold18503_4
MH0006.scaffold281920_2	MH0074.scaffold1421_12
MH0006.scaffold281977_1	MH0067.scaffold12777_4
MH0006.scaffold28256_1	MH0022.scaffold53395_2
MH0006.scaffold283947_1	MH0026.scaffold5269_1
MH0006.scaffold284145_1	MH0075.scaffold30153_2
MH0006.scaffold284167_1	V1.UC-21.scaffold18503_4
MH0006.scaffold284235_2	MH0039.scaffold21727_1
MH0006.scaffold284621_2	MH0057.scaffold4127_1
MH0006.scaffold284808_1	MH0014.scaffold21166_5
MH0006.scaffold284990_1	MH0059.scaffold26881_8
MH0006.scaffold285755_1	O2.UC-13.scaffold60018_1
MH0006.scaffold286341_2	V1.CD-15.scaffold877_8
MH0006.scaffold286992_1	MH0035.scaffold5110_1
MH0006.scaffold287007_1	MH0059.scaffold19386_4
MH0006.scaffold287208_1	MH0030.scaffold6144_1
MH0006.scaffold287217_1	MH0006.scaffold287217_1
MH0006.scaffold287327_1	MH0006.scaffold287327_1
MH0006.scaffold287394_4	MH0006.scaffold287394_4
MH0006.scaffold287514_2	MH0006.scaffold287514_2
MH0006.scaffold2887_10	MH0006.scaffold2887_10
MH0006.scaffold28940_2	V1.UC-19.scaffold85641_3
MH0006.scaffold289855_1	MH0074.scaffold7416_5
MH0006.scaffold290423_1	MH0006.scaffold290423_1
MH0006.scaffold290600_2	MH0006.scaffold290600_2
MH0006.scaffold290830_1	O2.UC-4.scaffold2007_1
MH0006.scaffold290965_1	V1.CD-13.scaffold36743_2
MH0006.scaffold29120_1	MH0006.scaffold29120_1
MH0006.scaffold29352_2	MH0086.scaffold6468_4
MH0006.scaffold294056_2	MH0074.scaffold43559_5
MH0006.scaffold294505_4	O2.UC-20.scaffold4602_7
MH0006.scaffold295378_1	MH0006.scaffold295378_1
MH0006.scaffold295596_3	MH0006.scaffold295596_3
MH0006.scaffold296212_6	V1.UC-15.scaffold4546_3
MH0006.scaffold29765_1	MH0067.scaffold3912_3
MH0006.scaffold298007_3	MH0083.scaffold1734_1
MH0006.scaffold298278_1	MH0006.scaffold298278_1
MH0006.scaffold298799_2	V1.CD-15.scaffold39594_1
MH0006.scaffold298995_1	V1.UC-8.scaffold16893_6
MH0006.scaffold299038_1	MH0079.scaffold25975_1
MH0006.scaffold299579_1	MH0085.scaffold10046_10
MH0006.scaffold300447_1	MH0032.scaffold1671_5
MH0006.scaffold300532_1	MH0057.scaffold43996_2
MH0006.scaffold300717_1	MH0006.scaffold300717_1
MH0006.scaffold300879_4	V1.UC-8.scaffold12646_2
MH0006.scaffold30122_1	MH0043.scaffold13467_5
MH0006.scaffold301445_1	MH0034.scaffold3827_8
MH0006.scaffold302664_1	MH0006.scaffold302664_1
MH0006.scaffold302681_3	MH0006.scaffold302681_3
MH0006.scaffold303678_1	MH0006.scaffold303678_1
MH0006.scaffold304667_2	MH0086.scaffold3434_6
MH0006.scaffold305062_2	MH0012.scaffold7821_7
MH0006.scaffold305236_1	MH0046.scaffold18259_2
MH0006.scaffold305351_1	MH0061.scaffold5740_2
MH0006.scaffold306499_1	MH0085.scaffold10046_10
MH0006.scaffold306595_1	V1.UC-21.scaffold27073_1
MH0006.scaffold30670_1	MH0006.scaffold30670_1
MH0006.scaffold306831_1	MH0006.scaffold306831_1
MH0006.scaffold306868_1	MH0066.C3423582_1
MH0006.scaffold306871_1	MH0006.scaffold306871_1
MH0006.scaffold307035_1	MH0067.scaffold7728_3
MH0006.scaffold307740_1	V1.UC-18.scaffold27350_1
MH0006.scaffold307789_1	V1.UC-7.scaffold4461_2
MH0006.scaffold307_2	MH0048.scaffold4627_1
MH0006.scaffold308030_2	V1.UC-21.scaffold6563_1
MH0006.scaffold308030_3	MH0070.scaffold41858_1
MH0006.scaffold3089_4	MH0006.scaffold3089_4
MH0006.scaffold309320_1	MH0082.scaffold107971_2
MH0006.scaffold309494_2	MH0006.scaffold309494_2
MH0006.scaffold310340_2	MH0006.scaffold310340_2
MH0006.scaffold311219_1	MH0037.scaffold77885_1
MH0006.scaffold311220_1	MH0006.scaffold311220_1
MH0006.scaffold311576_1	V1.UC-21.scaffold27073_1
MH0006.scaffold311649_1	MH0020.scaffold4785_3
MH0006.scaffold311689_1	MH0006.scaffold311689_1
MH0006.scaffold311811_3	MH0083.scaffold71759_1
MH0006.scaffold312246_1	MH0042.scaffold13955_5
MH0006.scaffold312534_2	MH0006.scaffold312534_2
MH0006.scaffold31295_1	MH0049.scaffold1508_1
MH0006.scaffold313022_2	MH0006.scaffold313022_2
MH0006.scaffold313134_1	V1.CD-11.scaffold9648_3
MH0006.scaffold313255_1	MH0006.scaffold313255_1
MH0006.scaffold313347_1	MH0006.scaffold313347_1
MH0006.scaffold313534_1	MH0077.scaffold39905_2
MH0006.scaffold313732_3	MH0006.scaffold313732_3
MH0006.scaffold313831_1	MH0030.scaffold8137_2
MH0006.scaffold31403_1	MH0041.scaffold48106_2
MH0006.scaffold314333_1	MH0039.scaffold21727_1
MH0006.scaffold314645_1	MH0003.scaffold16426_5
MH0006.scaffold314720_3	MH0020.scaffold2838_1
MH0006.scaffold315358_1	O2.UC-12.scaffold3458_8
MH0006.scaffold315795_1	MH0072.scaffold7901_2
MH0006.scaffold316030_1	MH0033.scaffold918_4
MH0006.scaffold316175_1	MH0039.scaffold21727_1
MH0006.scaffold31632_1	V1.UC-6.scaffold9175_7
MH0006.scaffold316343_1	MH0006.scaffold316343_1
MH0006.scaffold316349_1	MH0043.scaffold4832_2
MH0006.scaffold316605_1	MH0086.scaffold6468_4
MH0006.scaffold316656_2	MH0037.scaffold21966_5
MH0006.scaffold316780_2	MH0040.scaffold104579_1
MH0006.scaffold316882_1	V1.UC-14.scaffold76742_1
MH0006.scaffold316888_1	MH0007.C1983328_1
MH0006.scaffold316888_2	MH0007.C1983328_1
MH0006.scaffold317099_1	MH0006.scaffold317099_1
MH0006.scaffold317181_1	MH0065.scaffold53251_2
MH0006.scaffold317188_1	MH0045.scaffold30776_5
MH0006.scaffold317379_1	MH0006.scaffold317379_1
MH0006.scaffold317379_2	MH0006.scaffold317379_2
MH0006.scaffold317413_3	MH0068.scaffold3024_1
MH0006.scaffold317484_1	MH0009.scaffold3666_3
MH0006.scaffold317638_1	MH0006.scaffold317638_1
MH0006.scaffold317829_1	V1.CD-3.scaffold10648_4
MH0006.scaffold318153_1	MH0017.scaffold41212_3
MH0006.scaffold318180_3	V1.UC-18.scaffold47087_5
MH0006.scaffold318324_1	MH0042.scaffold41534_11
MH0006.scaffold318324_2	V1.CD-4.scaffold70383_4
MH0006.scaffold318443_1	MH0060.scaffold702_2
MH0006.scaffold318493_1	MH0070.scaffold15739_2
MH0006.scaffold318504_2	V1.UC-14.scaffold34724_1
MH0006.scaffold318931_1	MH0006.scaffold318931_1
MH0006.scaffold319070_1	MH0062.scaffold87339_1
MH0006.scaffold319392_1	MH0006.scaffold319392_1
MH0006.scaffold319408_1	MH0079.scaffold55382_1
MH0006.scaffold319451_1	MH0062.scaffold89948_1
MH0006.scaffold319554_1	MH0062.scaffold47902_2
MH0006.scaffold3195_3	MH0006.scaffold3195_3
MH0006.scaffold319614_1	MH0006.scaffold319614_1
MH0006.scaffold319690_1	V1.UC-14.scaffold28509_2
MH0006.scaffold319782_1	MH0079.scaffold55382_1
MH0006.scaffold319794_1	O2.UC-19.scaffold63458_1
MH0006.scaffold319919_1	V1.UC-18.scaffold47087_5
MH0006.scaffold319983_1	MH0006.scaffold319983_1
MH0006.scaffold320007_1	MH0006.scaffold320007_1
MH0006.scaffold320060_1	MH0006.scaffold320060_1
MH0006.scaffold320135_1	MH0006.scaffold320135_1
MH0006.scaffold320159_1	MH0071.scaffold1136_3
MH0006.scaffold32195_1	MH0085.scaffold3726_1
MH0006.scaffold32332_3	V1.CD-3.scaffold6106_6
MH0006.scaffold32695_1	MH0011.scaffold19493_3
MH0006.scaffold32695_6	MH0006.scaffold32695_6
MH0006.scaffold32896_2	MH0006.scaffold32896_2
MH0006.scaffold33151_1	MH0083.scaffold1988_10
MH0006.scaffold33529_2	MH0083.scaffold10421_5
MH0006.scaffold3388_2	V1.UC-9.scaffold4337_5
MH0006.scaffold34116_1	MH0037.scaffold46484_1
MH0006.scaffold34528_1	MH0042.scaffold29143_2
MH0006.scaffold34683_1	MH0045.scaffold2422_9
MH0006.scaffold34716_5	MH0006.scaffold34716_5
MH0006.scaffold34716_6	MH0006.scaffold34716_6
MH0006.scaffold3515_15	MH0006.scaffold3515_15
MH0006.scaffold35591_4	MH0085.scaffold1459_1
MH0006.scaffold35633_7	MH0006.scaffold35633_7
MH0006.scaffold3600_4	MH0016.scaffold6227_2
MH0006.scaffold36641_14	MH0006.scaffold36641_14
MH0006.scaffold36799_1	MH0084.scaffold18207_1
MH0006.scaffold3686_1	MH0045.scaffold4431_1
MH0006.scaffold36942_5	MH0068.scaffold378_6
MH0006.scaffold37144_13	O2.UC-11.scaffold19909_10
MH0006.scaffold37144_2	O2.UC-11.scaffold32059_4
MH0006.scaffold37144_7	MH0006.scaffold37144_7
MH0006.scaffold37144_9	MH0006.scaffold37144_9
MH0006.scaffold37548_2	MH0049.scaffold32869_2
MH0006.scaffold37703_1	V1.CD-8.scaffold915_2
MH0006.scaffold37707_1	V1.CD-8.scaffold45887_1
MH0006.scaffold38477_1	MH0078.scaffold2794_2
MH0006.scaffold39379_3	O2.UC-20.scaffold52923_21
MH0006.scaffold39735_2	MH0001.scaffold21829_1
MH0006.scaffold41014_2	MH0045.scaffold4894_1
MH0006.scaffold41079_1	MH0012.scaffold105343_1
MH0006.scaffold41479_1	MH0047.scaffold3775_1
MH0006.scaffold41479_2	MH0047.scaffold3775_1
MH0006.scaffold41806_1	MH0006.scaffold41806_1
MH0006.scaffold41806_2	MH0021.scaffold71712_1
MH0006.scaffold41806_3	MH0086.scaffold10615_6
MH0006.scaffold41923_1	MH0006.scaffold41923_1
MH0006.scaffold42125_5	MH0020.scaffold1307_1
MH0006.scaffold42614_1	V1.CD-3.scaffold10648_4
MH0006.scaffold42614_2	V1.CD-3.scaffold10648_4
MH0006.scaffold42614_3	O2.UC-14.scaffold2814_7
MH0006.scaffold42804_3	MH0043.scaffold7576_3
MH0006.scaffold44655_4	V1.CD-1.scaffold299_6
MH0006.scaffold4521_1	MH0020.scaffold5975_3
MH0006.scaffold45565_3	MH0054.scaffold46345_1
MH0006.scaffold45598_10	MH0074.scaffold1421_12
MH0006.scaffold47346_1	MH0068.scaffold996_3
MH0006.scaffold47680_1	MH0028.scaffold22329_3
MH0006.scaffold47680_2	O2.UC-22.scaffold18247_2
MH0006.scaffold48028_1	MH0057.scaffold10334_1
MH0006.scaffold48371_1	MH0006.scaffold48371_1
MH0006.scaffold48601_3	O2.UC-11.scaffold35711_1
MH0006.scaffold49467_1	MH0014.scaffold8411_3
MH0006.scaffold50929_3	MH0006.scaffold50929_3
MH0006.scaffold51030_1	MH0053.scaffold82586_1
MH0006.scaffold51030_3	MH0053.scaffold82586_1
MH0006.scaffold51567_2	MH0059.scaffold10740_1
MH0006.scaffold5168_2	O2.UC-19.scaffold38459_2
MH0006.scaffold51886_5	MH0068.scaffold17078_2
MH0006.scaffold52913_1	MH0006.scaffold52913_1
MH0006.scaffold52913_3	MH0006.scaffold52913_3
MH0006.scaffold52913_5	V1.UC-10.scaffold846_26
MH0006.scaffold52938_1	MH0006.scaffold52938_1
MH0006.scaffold53888_1	MH0084.scaffold24915_1
MH0006.scaffold55345_3	V1.CD-15.scaffold11976_1
MH0006.scaffold55798_2	MH0006.scaffold55798_2
MH0006.scaffold55894_1	MH0006.scaffold55894_1
[truncated: 45,562 more rows]
