# Supplementary material for: CRISPR targeting reveals a reservoir of common phages associated with the human gut microbiome
Source: HighWire-hosted journal article supplement (doi:10.1101/gr.138297.112), 2012-06-25
Supplement: Stern_DatasetS4.xlsx [file Stern_DatasetS4.xlsx]

## Sheet: final_phage_seed_set_991
MGE contig	Start ORF	End ORF	Strand	COG	Functional category	E-value	Phage?	COG annotation
MH0044.scaffold4626_2	286	990	+	COG0863	[DNA replication, recombination,and repair]	3e-15	NOT_PHAGE	DNA modification methylase .
MH0044.scaffold4626_2	1659	2528	-	NA	NA	NA	NA	NA
MH0044.scaffold4626_2	4060	5196	-	NA	NA	NA	NA	NA
MH0044.scaffold4626_2	5152	5469	+	NA	NA	NA	NA	NA
MH0044.scaffold4626_2	6059	6832	-	NA	NA	NA	NA	NA
MH0044.scaffold4626_2	6926	7495	-	NA	NA	NA	NA	NA
MH0044.scaffold4626_2	7997	8464	-	NA	NA	NA	NA	NA
MH0044.scaffold4626_2	9441	10154	-	NA	NA	NA	NA	NA
MH0044.scaffold4626_2	10677	11156	-	NA	NA	NA	NA	NA
MH0044.scaffold4626_2	11112	11561	+	NA	NA	NA	NA	NA
MH0044.scaffold4626_2	11570	12145	+	NONE	NONE	0.015	PHAGE	pfam06356, DUF1064, Protein of unknown function (DUF1064). This familyconsists of several phage and bacterial proteins ofunknown function.
MH0044.scaffold4626_2	12106	12708	+	NA	NA	NA	NA	NA
MH0044.scaffold4626_2	15094	15537	+	NA	NA	NA	NA	NA
MH0044.scaffold4626_2	14575	15126	-	NA	NA	NA	NA	NA
MH0044.scaffold4626_2	16251	17573	-	NONE	NONE	0.002	NOT_PHAGE	pfam05175, MTS, Methyltransferase small domain. This domain isfound in ribosomal RNA small subunit methyltransferase C aswell as other methyltransferases .
MH0073.scaffold33276_3	164	1219	-	NONE	NONE	2e-46	PHAGE	pfam03864, Phage_cap_E, Phage major capsid protein E. Major capsid protein E is involved with the stabilisation of the condensed form of the DNA molecule in phage heads.
MH0073.scaffold33276_3	1620	2735	-	COG0740	[Posttranslational modification, protein turnover, chaperones / Intracellular trafficking and secretion]	3e-26	NOT_PHAGE	ClpP, Protease subunit of ATP-dependent Clp proteases .
MH0073.scaffold33276_3	2728	4353	-	COG5511	[General function prediction only]	2e-35	PHAGE	Bacteriophage capsid protein .
MH0073.scaffold33276_3	4597	6615	-	COG5525	[General function prediction only]	9e-80	PHAGE	Bacteriophage tail assembly protein .
MH0073.scaffold33276_3	8413	9228	-	NONE	NONE	0.0003	NOT_PHAGE	PHA00330, PHA00330, putative replication initiation protein.
MH0012.scaffold110296_1	145	1245	-	COG4974	[DNA replication, recombination, and repair]	4e-17	NOT_PHAGE	XerD, Site-specific recombinase XerD .
MH0012.scaffold110296_1	1307	1837	-	NONE	NONE	6e-05	NOT_PHAGE	cd00093, HTH_XRE, Helix-turn-helix XRE-family like proteins. Prokaryotic DNA binding proteins belonging to the xenobiotic response element family of transcriptional regulators..
MH0012.scaffold110296_1	2012	2239	+	NONE	NONE	2e-10	NOT_PHAGE	pfam12224, Amidoligase_2, Putative amidoligase enzyme. This family of proteins are likely to act as amidoligase enzymes Protein in this family are found in conserved gene neighborhoods encoding a glutamine amidotransferase-like thiol peptidase (in proteobacteria) or an Aig2 family cyclotransferase protein (in firmicutes).
MH0012.scaffold110296_1	2249	2935	+	NONE	NONE	2e-43	NOT_PHAGE	pfam12224, Amidoligase_2, Putative amidoligase enzyme. This family of proteins are likely to act as amidoligase enzymes Protein in this family are found in conserved gene neighborhoods encoding a glutamine amidotransferase-like thiol peptidase (in proteobacteria) or an Aig2 family cyclotransferase protein (in firmicutes).
MH0012.scaffold110296_1	3091	3552	+	NONE	NONE	8e-12	NOT_PHAGE	cd06661, GGCT_like, GGCT-like domains, also called AIG2-like family. Gamma-glutamyl cyclotransferase (GGCT) catalyzes the formation of pyroglutamic acid (5-oxoproline) from dipeptides containing gamma-glutamyl, and is a dimeric protein. In Homo sapiens, the protein is encoded by the gene C7orf24, and the enzyme participates in the gamma-glutamyl cycle. Hereditary defects in the gamma-glutamyl cyc…
MH0012.scaffold110296_1	3616	4530	-	NONE	NONE	0.026	NOT_PHAGE	pfam05975, EcsB, Bacterial ABC transporter protein EcsB. This family consists of several bacterial ABC transporter proteins which are homologous to the EcsB protein of Bacillus subtilis. EcsB is thought to encode a hydrophobic protein with six membrane-spanning helices in a pattern found in other hydrophobic components of ABC transporters.
MH0012.scaffold110296_1	5148	5465	+	NA	NA	NA	NA	NA
MH0012.scaffold110296_1	5462	5824	+	NA	NA	NA	NA	NA
MH0012.scaffold110296_1	6067	6357	+	NONE	NONE	0.015	NOT_PHAGE	cd00118, LysM, Lysin domain, found in a variety of enzymes involved in bacterial cell wall degradation. This domain may have a general peptidoglycan binding function..
MH0012.scaffold110296_1	6481	7434	+	COG5377	[DNA replication, recombination, and repair]	2e-45	PHAGE	Phage-related protein, predicted endonuclease .
MH0012.scaffold110296_1	7495	8385	+	COG3723	[DNA replication, recombination, and repair]	2e-49	NOT_PHAGE	RecT, Recombinational DNA repair protein (RecE pathway) .
MH0012.scaffold110296_1	8382	8774	+	NA	NA	NA	NA	NA
MH0012.scaffold110296_1	8809	9120	+	NA	NA	NA	NA	NA
MH0012.scaffold110296_1	9129	9764	+	NA	NA	NA	NA	NA
MH0012.scaffold110296_1	9781	10488	+	COG1484	[DNA replication, recombination, and repair]	6e-20	NOT_PHAGE	DnaC, DNA replication protein .
MH0012.scaffold110296_1	10506	10907	+	COG0629	[DNA replication, recombination, and repair]	2e-14	NOT_PHAGE	Ssb, Single-stranded DNA-binding protein .
MH0012.scaffold110296_1	11562	11963	+	NA	NA	NA	NA	NA
MH0012.scaffold110296_1	12292	12708	+	NA	NA	NA	NA	NA
MH0012.scaffold110296_1	12946	14172	+	COG0863	[DNA replication, recombination, and repair]	2e-31	NOT_PHAGE	DNA modification methylase .
MH0012.scaffold110296_1	14209	14700	+	NA	NA	NA	NA	NA
MH0012.scaffold110296_1	14697	16019	+	NONE	NONE	2e-46	PHAGE	TIGR01547, phage_term_2, This model detects members of a highly divergent family of the large subunit of phage terminase. All members are encoded by phage genomes or within prophage regions of bacterial genomes. This is a distinct family from pfam03354.
MH0012.scaffold110296_1	16012	18024	+	COG3567	[Function unknown]	3e-71	NOT_PHAGE	Uncharacterized protein conserved in bacteria .
MH0022.scaffold53395_2	290	3340	+	COG5412	[Function unknown]	1e-15	PHAGE	Phage-related protein .
MH0022.scaffold53395_2	3420	3905	+	NONE	NONE	0.008	NOT_PHAGE	PRK09138, PRK09138, DNA topoisomerase I; Validated.
MH0022.scaffold53395_2	3912	4691	+	NA	NA	NA	NA	NA
MH0022.scaffold53395_2	5399	6550	+	COG3299	[Function unknown]	3e-08	PHAGE	XkdT, Uncharacterized homolog of phage Mu protein gp47 .
MH0022.scaffold53395_2	6531	7859	+	NA	NA	NA	NA	NA
MH0022.scaffold53395_2	8256	9179	+	NA	NA	NA	NA	NA
MH0022.scaffold53395_2	9312	9827	+	NONE	NONE	0.009	NOT_PHAGE	TIGR01736, FGAM_synth_II, Phosphoribosylformylglycinamidine synthase is a single, long polypeptide in most Proteobacteria and eukarotes. Three proteins are required in Bacillus subtilis and many other species. This is the longest of the three and is designated PurL, phosphoribosylformylglycinamidine synthase II, or FGAM synthase II.
MH0022.scaffold53395_2	10133	11332	+	NONE	NONE	8e-14	NOT_PHAGE	cd01646, RT_Bac_retron_I, RT_Bac_retron_I: Reverse transcriptases (RTs) in bacterial retrotransposons or retrons. The polymerase reaction of this enzyme leads to the production of a unique RNA-DNA complex called msDNA (multicopy single-stranded (ss)DNA) in which a small ssDNA branches out from a small ssRNA molecule via a 2'-5'phosphodiester linkage. Bacterial retron RTs produce cDNA correspondin…
V1.UC-19.scaffold2480_6	408	1076	-	NA	NA	NA	NA	NA
V1.UC-19.scaffold2480_6	1377	2405	-	COG1475	[Transcription]	5e-10	NOT_PHAGE	Spo0J, Predicted transcriptional regulators .
V1.UC-19.scaffold2480_6	4019	4825	-	NONE	NONE	0.002	NOT_PHAGE	PRK12704, PRK12704, phosphodiesterase; Provisional.
V1.UC-19.scaffold2480_6	6037	7293	-	NA	NA	NA	NA	NA
V1.UC-19.scaffold2480_6	7383	8042	-	NONE	NONE	0.005	PHAGE	pfam11417, Inhibitor_G39P, Loader and inhibitor of phage G40P. G39P inhibits the initiation of DNA replication by blocking G40P replicative helicase. G39P has a bipartite stricture consisting of a folded N-terminal domain and an unfolded C-terminal domain. The C terminal is essential for helicase interaction.
V1.UC-19.scaffold2480_6	8042	8962	-	NA	NA	NA	NA	NA
V1.UC-19.scaffold2480_6	9474	10526	-	COG3723	[DNA replication, recombination, and repair]	4e-44	NOT_PHAGE	RecT, Recombinational DNA repair protein (RecE pathway) .
V1.UC-19.scaffold2480_6	11106	12053	-	COG3064	[Cell envelope biogenesis, outer membrane]	0.0006	NOT_PHAGE	TolA, Membrane protein involved in colicin uptake .
V1.UC-19.scaffold2480_6	12226	12909	-	COG5377	[DNA replication, recombination, and repair]	3e-15	PHAGE	Phage-related protein, predicted endonuclease .
V1.UC-19.scaffold2480_6	15573	16193	+	COG1974	[Transcription / Signal transduction mechanisms]	4e-24	NOT_PHAGE	LexA, SOS-response transcriptional repressors (RecA-mediated autopeptidases) .
V1.UC-19.scaffold2480_6	16200	17192	+	NONE	NONE	6e-05	NOT_PHAGE	smart00513, SAP, Putative DNA-binding (bihelical) motif predicted to be involved in chromosomal organisation.
V1.UC-19.scaffold2480_6	17707	18846	+	COG0582	[DNA replication, recombination, and repair]	1e-06	NOT_PHAGE	XerC, Integrase .
V1.CD-8.scaffold111064_3	592	1740	-	NONE	NONE	0.006	NOT_PHAGE	pfam05955, Herpes_gp2, Equine herpesvirus glycoprotein gp2. This family consists of a number of glycoprotein gp2 sequences from equine herpesviruses.
V1.CD-8.scaffold111064_3	1756	2787	-	NONE	NONE	4e-17	NOT_PHAGE	PHA00148, PHA00148, lower collar protein.
V1.CD-8.scaffold111064_3	2780	3652	-	NONE	NONE	7e-47	NOT_PHAGE	PHA00147, PHA00147, upper collar protein.
V1.CD-8.scaffold111064_3	3665	5248	-	NONE	NONE	4e-32	PHAGE	PHA00380, PHA00380, tail protein.
V1.CD-8.scaffold111064_3	5345	6772	-	NONE	NONE	1e-62	NOT_PHAGE	PHA00144, PHA00144, major head protein.
V1.CD-8.scaffold111064_3	7054	7857	-	NONE	NONE	0.038	NOT_PHAGE	pfam01471, PG_binding_1, Putative peptidoglycan binding domain. This domain is composed of three alpha helices. This domain is found at the N or C terminus of a variety of enzymes involved in bacterial cell wall degradation. This domain may have a general peptidoglycan binding function. This family is found N-terminal to the catalytic domain of matrixins. The domain is found to bind peptidoglycan…
V1.CD-8.scaffold111064_3	8234	9220	-	NONE	NONE	7e-69	NOT_PHAGE	pfam05894, Podovirus_Gp16, Podovirus DNA encapsidation protein (Gp16). This family consists of several DNA encapsidation protein (Gp16) sequences from the phi-29-like viruses. Gene product 16 catalyses the in vivo and in vitro genome-encapsidation reaction.
V1.CD-8.scaffold111064_3	9226	10902	-	COG0417	[DNA replication, recombination, and repair]	0.011	NOT_PHAGE	PolB, DNA polymerase elongation subunit (family B) .
V1.CD-8.scaffold111064_3	10904	11761	-	NA	NA	NA	NA	NA
MH0066.scaffold17926_1	519	914	+	NONE	NONE	0.005	NOT_PHAGE	pfam02554, CstA, Carbon starvation protein CstA. This family consists of Carbon starvation protein CstA a predicted membrane protein. It has been suggested that CstA is involved in peptide utilisation.
MH0066.scaffold17926_1	1193	2203	+	NONE	NONE	0.004	PHAGE	pfam02914, Mu_transposase, Bacteriophage Mu transposase.
MH0066.scaffold17926_1	2258	2515	+	COG2826	[DNA replication, recombination, and repair]	8e-05	NOT_PHAGE	Tra8, Transposase and inactivated derivatives, IS30 family .
MH0066.scaffold17926_1	2783	3343	+	NA	NA	NA	NA	NA
MH0066.scaffold17926_1	3354	4067	+	COG0741	[Cell envelope biogenesis, outer membrane]	2e-09	NOT_PHAGE	MltE, Soluble lytic murein transglycosylase and related regulatory proteins (some contain LysM/invasin domains) .
MH0066.scaffold17926_1	4172	4651	+	NONE	NONE	6e-07	NOT_PHAGE	PRK12270, kgd, alpha-ketoglutarate decarboxylase; Reviewed.
MH0066.scaffold17926_1	4663	5901	+	NONE	NONE	e-105	NOT_PHAGE	pfam10926, DUF2800, Protein of unknown function (DUF2800). This is a family of uncharacterized proteins found in bacteria and viruses. Some members of this family are annotated as being Phi APSE P51-like proteins.
MH0066.scaffold17926_1	6008	6457	+	NA	NA	NA	NA	NA
MH0066.scaffold17926_1	6484	7179	+	NONE	NONE	2e-40	PHAGE	pfam10991, DUF2815, Protein of unknown function (DUF2815). This is a phage related family of proteins with unknown function.
MH0066.scaffold17926_1	7180	9180	+	COG0749	[DNA replication, recombination, and repair]	1e-14	NOT_PHAGE	PolA, DNA polymerase I - 3'-5' exonuclease and polymerase domains .
MH0066.scaffold17926_1	9426	9908	+	NA	NA	NA	NA	NA
MH0066.scaffold17926_1	9958	10671	+	COG0175	[Amino acid transport and metabolism / Coenzyme metabolism]	1e-08	NOT_PHAGE	CysH, 3'-phosphoadenosine 5'-phosphosulfate sulfotransferase (PAPS reductase)/FAD synthetase and related enzymes .
MH0066.scaffold17926_1	10668	11309	+	COG1351	[Nucleotide transport and metabolism]	5e-25	NOT_PHAGE	THY1, Predicted alternative thymidylate synthase .
MH0066.scaffold17926_1	11314	11634	+	NA	NA	NA	NA	NA
MH0066.scaffold17926_1	11791	12198	+	NA	NA	NA	NA	NA
MH0066.scaffold17926_1	12683	15085	+	COG5545	[General function prediction only]	2e-60	NOT_PHAGE	Predicted P-loop ATPase and inactivated derivatives .
MH0066.scaffold17926_1	15450	15638	+	NONE	NONE	0.022	NOT_PHAGE	pfam08774, VRR_NUC, VRR-NUC domain.
MH0066.scaffold17926_1	15635	17023	+	COG0553	[Transcription / DNA replication, recombination, and repair]	1e-16	NOT_PHAGE	HepA, Superfamily II DNA/RNA helicases, SNF2 family .
MH0066.scaffold17926_1	17376	17801	+	NA	NA	NA	NA	NA
MH0066.scaffold17926_1	17997	18560	+	COG3728	[DNA replication, recombination, and repair]	1e-12	PHAGE	XtmA, Phage terminase, small subunit .
MH0066.scaffold17926_1	18520	19731	+	COG1783	[General function prediction only]	2e-06	PHAGE	XtmB, Phage terminase large subunit .
MH0066.scaffold17926_1	19807	21261	+	NONE	NONE	1e-46	PHAGE	pfam05133, Phage_prot_Gp6, Phage portal protein, SPP1 Gp6-like. This protein forms a hole, or portal, that enables DNA passage during packaging and ejection. It also forms the junction between the phage head (capsid) and the tail proteins. During SPP1 morphogenesis, Gp6 participates in the procapsid assembly reaction. This family also includes family Phage_min_cap, pfam05126.
MH0066.scaffold17926_1	21230	22822	+	COG5585	[Signal transduction mechanisms]	0.002	NOT_PHAGE	NAD+--asparagine ADP-ribosyltransferase .
MH0066.scaffold17926_1	23183	23806	+	NONE	NONE	2e-13	PHAGE	pfam06810, Phage_GP20, Phage minor structural protein GP20. This family consists of several phage minor structural protein GP20 sequences of around 180 residues in length. The function of this family is unknown.
MH0066.scaffold17926_1	23848	25023	+	NA	NA	NA	NA	NA
MH0066.scaffold17926_1	25027	25428	+	NONE	NONE	0.017	PHAGE	cd08055, gp15, Head-Tail Connector Protein gp15 of Bacteriophage SPP1 and similar proteins. The bacteriophage SPP1 gp15 protein is critical in the assembly of the connector, a specialized structure that serves as an interface for head and tail attachment, as well as a point at which DNA exits the head during infection by the bacteriophage. It forms a dodecameric ring structure that comprises the …
MH0066.scaffold17926_1	25422	25793	+	NA	NA	NA	NA	NA
MH0066.scaffold17926_1	25793	26287	+	NA	NA	NA	NA	NA
MH0060.scaffold71598_3	1553	2368	+	NONE	NONE	0.042	NOT_PHAGE	TIGR00575, dnlj, The member of this family from Treponema pallidum differs in having three rather than just one copy of the BRCT (BRCA1 C Terminus) domain (pfam00533) at the C-terminus. It is included in the seed.
MH0060.scaffold71598_3	2645	3892	+	COG4974	[DNA replication, recombination, and repair]	4e-11	NOT_PHAGE	XerD, Site-specific recombinase XerD .
MH0060.scaffold71598_3	4240	4968	-	COG5632	[Cell envelope biogenesis, outer membrane]	4e-14	NOT_PHAGE	N-acetylmuramoyl-L-alanine amidase .
MH0060.scaffold71598_3	6298	10368	-	COG4926	[Function unknown]	1e-06	PHAGE	PblB, Phage-related protein .
MH0060.scaffold71598_3	10759	14496	-	COG5412	[Function unknown]	2e-09	PHAGE	Phage-related protein .
MH0060.scaffold71598_3	18079	19098	-	NA	NA	NA	NA	NA
MH0060.scaffold71598_3	19220	19849	-	NA	NA	NA	NA	NA
MH0060.scaffold71598_3	21654	22343	-	NA	NA	NA	NA	NA
MH0014.scaffold16636_6	82	2259	-	COG4695	[Function unknown]	3e-25	PHAGE	Phage-related protein .
MH0014.scaffold16636_6	2244	3440	-	NONE	NONE	0.023	NOT_PHAGE	pfam05127, DUF699, Putative ATPase (DUF699). This putative domain is about 350 amino acid residues long and appears to have a P-loop motif, suggesting this is an ATPase. This domain is often associated with pfam00583. This domain is found in isolation in the uncharacterized protein HI1254 from Haemophilus influenzae.
MH0014.scaffold16636_6	3619	4422	-	COG5484	[Function unknown]	5e-12	NOT_PHAGE	Uncharacterized conserved protein .
MH0014.scaffold16636_6	4502	5173	-	COG1738	[Function unknown]	6e-25	NOT_PHAGE	Uncharacterized conserved protein .
MH0014.scaffold16636_6	5182	5901	-	NA	NA	NA	NA	NA
MH0014.scaffold16636_6	5911	6225	+	NA	NA	NA	NA	NA
MH0014.scaffold16636_6	6397	7098	-	COG1475	[Transcription]	2e-09	NOT_PHAGE	Spo0J, Predicted transcriptional regulators .
MH0014.scaffold16636_6	7473	7871	-	NA	NA	NA	NA	NA
MH0014.scaffold16636_6	8205	8426	-	NONE	NONE	0.025	NOT_PHAGE	smart00530, HTH_XRE, Helix-turn-helix XRE-family like proteins.
MH0014.scaffold16636_6	9235	9768	-	COG4933	[Function unknown]	3e-05	NOT_PHAGE	Uncharacterized conserved protein .
MH0014.scaffold16636_6	10333	10878	-	NA	NA	NA	NA	NA
MH0014.scaffold16636_6	10886	12460	-	COG1475	[Transcription]	2e-13	NOT_PHAGE	Spo0J, Predicted transcriptional regulators .
MH0014.scaffold16636_6	12482	13375	-	COG0286	[Defense mechanisms]	4e-05	NOT_PHAGE	HsdM, Type I restriction-modification system methyltransferase subunit .
MH0014.scaffold16636_6	13379	13876	-	NA	NA	NA	NA	NA
MH0014.scaffold16636_6	13891	14334	-	NA	NA	NA	NA	NA
MH0014.scaffold16636_6	14409	14735	-	NA	NA	NA	NA	NA
MH0014.scaffold16636_6	14722	15267	-	COG3584	[Function unknown]	6e-11	NOT_PHAGE	Uncharacterized protein conserved in bacteria .
MH0014.scaffold16636_6	15287	15844	-	NA	NA	NA	NA	NA
MH0014.scaffold16636_6	15856	16719	-	COG3935	[DNA replication, recombination, and repair]	2e-09	NOT_PHAGE	DnaD, Putative primosome component and related proteins .
MH0014.scaffold16636_6	16732	17280	-	COG0629	[DNA replication, recombination, and repair]	1e-17	NOT_PHAGE	Ssb, Single-stranded DNA-binding protein .
MH0014.scaffold16636_6	17571	18101	-	NA	NA	NA	NA	NA
MH0014.scaffold16636_6	18098	18748	-	COG1235	[General function prediction only]	0.0002	NOT_PHAGE	PhnP, Metal-dependent hydrolases of the beta-lactamase superfamily I .
MH0014.scaffold72074_1	127	1530	+	COG0553	[Transcription / DNA replication, recombination, and repair]	3e-24	NOT_PHAGE	HepA, Superfamily II DNA/RNA helicases, SNF2 family .
MH0014.scaffold72074_1	1527	2021	+	NA	NA	NA	NA	NA
MH0014.scaffold72074_1	2229	2897	+	NA	NA	NA	NA	NA
MH0014.scaffold72074_1	2899	3636	+	NONE	NONE	2e-07	NOT_PHAGE	cd00233, VIP2, VIP2; A family of actin-ADP-ribosylating toxin. A member of the Bacillus-prodiced vegetative insecticidal proteins (VIPs) possesses high specificity against the major insect pest, corn rootworms, and belongs to a classs of binary toxins and regulators of biological pathways distinct from classical A-B toxins. A novel family of insecticidal ADP-ribosyltransferses were isolated from …
MH0014.scaffold72074_1	3831	4565	+	NA	NA	NA	NA	NA
MH0014.scaffold72074_1	4814	5371	+	NA	NA	NA	NA	NA
MH0014.scaffold72074_1	5361	6581	+	COG1783	[General function prediction only]	3e-41	PHAGE	XtmB, Phage terminase large subunit .
MH0014.scaffold72074_1	6791	7240	+	NA	NA	NA	NA	NA
MH0014.scaffold72074_1	8074	8586	+	COG3617	[Transcription]	2e-27	PHAGE	Prophage antirepressor .
MH0014.scaffold72074_1	8922	10358	+	NONE	NONE	7e-28	PHAGE	TIGR01542, A118_put_portal, This model represents a family of phage minor structural proteins. The protein is suggested to be the head-tail connector, or portal protein, on the basis of its position in the phage gene order, its presence in mature phage, its size, and its conservation across a number of complete genomes of tailed phage that lack other candidate portal proteins. Several other known…
MH0014.scaffold72074_1	10519	11526	+	NONE	NONE	7e-08	PHAGE	pfam06152, Phage_min_cap2, Phage minor capsid protein 2. Family of related phage minor capsid proteins.
MH0014.scaffold72074_1	11748	12338	+	NONE	NONE	9e-06	PHAGE	pfam06810, Phage_GP20, Phage minor structural protein GP20. This family consists of several phage minor structural protein GP20 sequences of around 180 residues in length. The function of this family is unknown.
MH0014.scaffold72074_1	12375	13568	+	NA	NA	NA	NA	NA
MH0014.scaffold72074_1	13600	13989	+	NONE	NONE	1e-06	PHAGE	cd08053, Yqbg, Putative Head-Tail Connector Protein Yqbg from Bacillus subtilis and similar proteins. The uncharacterized Bacillus subtilis Yqbg protein, whose gene is part of the unusual genetic element called skin, shows a similar structure to the connector proteins gp6 and gp15 from bacteriophage HK97 and SPP1, respectively. gp6 and gp15 are critical in the assembly of the connector, a special…
MH0014.scaffold72074_1	13986	14393	+	NA	NA	NA	NA	NA
MH0014.scaffold72074_1	14396	14848	+	COG2366	[General function prediction only]	0.042	NOT_PHAGE	Protein related to penicillin acylase .
MH0014.scaffold72074_1	15412	16182	+	NA	NA	NA	NA	NA
MH0014.scaffold72074_1	16265	16786	+	NA	NA	NA	NA	NA
MH0060.scaffold84056_1	69	701	+	NA	NA	NA	NA	NA
MH0060.scaffold84056_1	857	1579	+	NA	NA	NA	NA	NA
MH0060.scaffold84056_1	3058	3762	+	NA	NA	NA	NA	NA
MH0060.scaffold84056_1	1648	2757	-	NA	NA	NA	NA	NA
MH0060.scaffold84056_1	5894	6517	+	NA	NA	NA	NA	NA
MH0060.scaffold84056_1	4217	5938	-	COG1705	[Cell motility and secretion / Intracellular trafficking and secretion]	0.002	NOT_PHAGE	FlgJ, Muramidase (flagellum-specific) .
MH0060.scaffold84056_1	6568	6879	+	NA	NA	NA	NA	NA
MH0060.scaffold84056_1	6857	7498	-	NA	NA	NA	NA	NA
MH0060.scaffold84056_1	7557	8219	-	NONE	NONE	0.015	NOT_PHAGE	PHA00662, PHA00662, hypothetical protein.
MH0060.scaffold84056_1	8236	8697	-	NA	NA	NA	NA	NA
MH0060.scaffold84056_1	9233	10672	-	NONE	NONE	2e-41	PHAGE	pfam12236, Head-tail_con, Bacteriophage head to tail connecting protein. This family of proteins is found in bacteria and viruses. Proteins in this family are typically between 516 and 555 amino acids in length. The head-tail connector, a dodecamer of gp10, is embedded within a unique five-fold vertex of the head. The connector serves as the site of assembly of the transient DNA packaging motor t…
MH0032.scaffold47022_8	8770	9519	-	NA	NA	NA	NA	NA
MH0032.scaffold47022_8	11409	12029	-	NONE	NONE	0.016	NOT_PHAGE	cd04299, GT1_Glycogen_Phosphorylase_like, This family is most closely related to the oligosaccharide phosphorylase domain family and other unidentified sequences. Oligosaccharide phosphorylase catalyzes the breakdown of oligosaccharides into glucose-1-phosphate units. They are important allosteric enzymes in carbohydrate metabolism. The members of this family are found in bacteria and Archaea..
MH0032.scaffold47022_8	12835	13662	-	NONE	NONE	0.001	NOT_PHAGE	PRK08853, PRK08853, DNA polymerase III subunits gamma and tau; Validated.
MH0032.scaffold47022_8	13681	14781	-	COG0592	[DNA replication, recombination, and repair]	3e-12	NOT_PHAGE	DnaN, DNA polymerase sliding clamp subunit (PCNA homolog) .
V1.UC-18.scaffold5435_13	3381	4901	+	COG3500	[General function prediction only]	3e-14	PHAGE	Phage protein D .
V1.UC-18.scaffold5435_13	4852	5601	+	NONE	NONE	2e-06	PHAGE	pfam04717, Phage_base_V, Phage-related baseplate assembly protein. Family of phage baseplate assembly proteins responsible for forming the small spike at the end of the tail. Also found in bacteria, probably the result of horizontal transmission.
V1.UC-18.scaffold5435_13	6330	7466	+	COG3948	[General function prediction only]	7e-28	PHAGE	Phage-related baseplate assembly protein .
V1.UC-18.scaffold5435_13	7459	8106	+	COG4385	[General function prediction only]	2e-06	PHAGE	gpI, Bacteriophage P2-related tail formation protein .
V1.UC-18.scaffold5435_13	8119	8763	+	NONE	NONE	0.031	NOT_PHAGE	PRK08560, PRK08560, tyrosyl-tRNA synthetase; Validated.
V1.UC-18.scaffold5435_13	9823	10332	+	NONE	NONE	0.018	NOT_PHAGE	pfam11853, DUF3373, Protein of unknown function (DUF3373). This family of proteins are functionally uncharacterized. This protein is found in bacteria. Proteins in this family are typically between 472 to 574 amino acids in length.
V1.CD-11.scaffold56191_3	223	2385	-	NA	NA	NA	NA	NA
V1.CD-11.scaffold56191_3	2390	4486	-	NA	NA	NA	NA	NA
V1.CD-11.scaffold56191_3	5459	6445	-	NA	NA	NA	NA	NA
V1.CD-11.scaffold56191_3	6496	7149	+	NA	NA	NA	NA	NA
V1.CD-11.scaffold56191_3	7135	8778	-	NA	NA	NA	NA	NA
V1.CD-11.scaffold56191_3	8982	9680	-	NA	NA	NA	NA	NA
V1.CD-11.scaffold56191_3	9683	10450	-	NA	NA	NA	NA	NA
V1.CD-11.scaffold56191_3	10450	11241	-	NA	NA	NA	NA	NA
V1.CD-11.scaffold56191_3	11253	12059	-	NA	NA	NA	NA	NA
V1.CD-11.scaffold56191_3	12740	14248	-	NA	NA	NA	NA	NA
V1.CD-11.scaffold56191_3	14288	14971	-	NONE	NONE	0.037	NOT_PHAGE	pfam05087, Rota_VP2, Rotavirus VP2 protein. Rotavirus particles consist of three concentric proteinaceous capsid layers. The innermost capsid (core) is made of VP2. The genomic RNA and the two minor proteins VP1 and VP3 are encapsidated within this layer. The N-terminus of rotavirus VP2 is necessary for the encapsidation of VP1 and VP3.
V1.CD-11.scaffold56191_3	14991	15731	-	NA	NA	NA	NA	NA
V1.CD-11.scaffold56191_3	15859	17832	-	COG1051	[Nucleotide transport and metabolism]	2e-11	NOT_PHAGE	ADP-ribose pyrophosphatase .
V1.CD-11.scaffold56191_3	18314	20284	-	NONE	NONE	4e-07	NOT_PHAGE	smart00306, HintN, Hint (Hedgehog/Intein) domain N-terminal region. Hedgehog/Intein domain, N-terminal region. Domain has been split to accommodate large insertions of endonucleases.
V1.CD-11.scaffold56191_3	20487	22190	-	NONE	NONE	1e-10	PHAGE	pfam04860, Phage_portal, Phage portal protein. Bacteriophage portal proteins form a dodecamer and is located at a five-fold vertex of the viral capsid. The portal complex forms a channel through which the viral DNA is packaged into the capsid, and exits during infection. The portal protein is though to rotate during DNA packaging. Portal proteins from different phage show little sequence homology…
V1.CD-11.scaffold56191_3	22203	23405	-	NA	NA	NA	NA	NA
MH0059.scaffold26881_8	307	930	-	NA	NA	NA	NA	NA
MH0059.scaffold26881_8	1194	2240	-	COG2826	[DNA replication, recombination, and repair]	5e-53	NOT_PHAGE	Tra8, Transposase and inactivated derivatives, IS30 family .
MH0059.scaffold26881_8	2304	2540	-	COG3655	[Transcription]	0.003	NOT_PHAGE	Predicted transcriptional regulator .
MH0059.scaffold26881_8	2636	2926	-	COG1476	[Transcription]	8e-08	NOT_PHAGE	Predicted transcriptional regulators .
MH0059.scaffold26881_8	3056	3367	+	NONE	NONE	0.015	NOT_PHAGE	cd06286, PBP1_CcpB_like, Ligand-binding domain of a novel transcription factor implicated in catabolite repression in Bacillus and Clostridium species. This group includes the ligand-binding domain of a novel transcription factor implicated in catabolite repression in Bacillus and Clostridium species. CcpB is 30% identical in sequence to CcpA which functions as the major transcriptional regulator…
MH0059.scaffold26881_8	3379	3759	+	NA	NA	NA	NA	NA
MH0059.scaffold26881_8	3802	4176	-	NA	NA	NA	NA	NA
MH0059.scaffold26881_8	4189	5166	-	NONE	NONE	0.049	NOT_PHAGE	pfam10030, DUF2272, Uncharacterized protein conserved in bacteria (DUF2272). Members of this family of hypothetical bacterial proteins have no known function.
MH0059.scaffold26881_8	5482	5820	-	NA	NA	NA	NA	NA
MH0059.scaffold26881_8	6356	7576	-	NA	NA	NA	NA	NA
MH0059.scaffold26881_8	7580	8575	-	NONE	NONE	2e-21	NOT_PHAGE	cd01651, RT_G2_intron, RT_G2_intron: Reverse transcriptases (RTs) with group II intron origin. RT transcribes DNA using RNA as template. Proteins in this subfamily are found in bacterial and mitochondrial group II introns. Their most probable ancestor was a retrotransposable element with both gag-like and pol-like genes. This subfamily of proteins appears to have captured the RT sequences from tr…
MH0059.scaffold26881_8	8987	9538	-	NA	NA	NA	NA	NA
MH0059.scaffold26881_8	9832	10659	-	COG5301	[General function prediction only]	0.025	PHAGE	Phage-related tail fibre protein .
MH0059.scaffold26881_8	10743	11051	-	NA	NA	NA	NA	NA
MH0059.scaffold26881_8	11053	11364	-	NA	NA	NA	NA	NA
MH0059.scaffold26881_8	11374	12168	-	COG5301	[General function prediction only]	2e-21	PHAGE	Phage-related tail fibre protein .
V1.UC-9.scaffold24720_5	427	2763	+	COG5276	[Function unknown]	0.046	NOT_PHAGE	Uncharacterized conserved protein .
V1.UC-9.scaffold24720_5	2723	5167	+	NA	NA	NA	NA	NA
V1.UC-9.scaffold24720_5	5172	6737	+	NA	NA	NA	NA	NA
V1.UC-9.scaffold24720_5	6734	8350	+	NA	NA	NA	NA	NA
V1.UC-9.scaffold24720_5	8343	9719	+	NA	NA	NA	NA	NA
V1.UC-9.scaffold24720_5	9785	10471	+	NA	NA	NA	NA	NA
V1.UC-9.scaffold24720_5	10434	10922	+	NA	NA	NA	NA	NA
V1.UC-9.scaffold24720_5	11935	12549	+	NA	NA	NA	NA	NA
V1.UC-9.scaffold24720_5	12912	13790	+	NA	NA	NA	NA	NA
V1.UC-9.scaffold24720_5	14804	15868	+	NONE	NONE	6e-12	NOT_PHAGE	pfam04383, KilA-N, KilA-N domain. The amino-terminal module of the D6R/N1R proteins defines a novel, conserved DNA-binding domain (the KilA-N domain) that is found in a wide range of proteins of large bacterial and eukaryotic DNA viruses. The KilA-N domain family also includes the previously defined APSES domain. The KilA-N and APSES domains may also share a common fold with the nucleic acid-bind…
V1.UC-9.scaffold24720_5	15975	16820	+	NA	NA	NA	NA	NA
V1.UC-9.scaffold24720_5	19532	20338	+	NA	NA	NA	NA	NA
V1.UC-9.scaffold24720_5	20340	24833	+	NA	NA	NA	NA	NA
V1.UC-9.scaffold24720_5	25496	26191	+	NA	NA	NA	NA	NA
V1.UC-9.scaffold24720_5	27408	28376	+	NA	NA	NA	NA	NA
V1.UC-9.scaffold24720_5	28391	29110	+	NA	NA	NA	NA	NA
V1.UC-9.scaffold24720_5	29138	30127	-	COG0675	[DNA replication, recombination, and repair]	4e-22	NOT_PHAGE	Transposase and inactivated derivatives .
V1.UC-9.scaffold24720_5	30136	30990	+	NA	NA	NA	NA	NA
MH0057.scaffold10334_1	300	1502	-	NONE	NONE	4e-08	NOT_PHAGE	cd01651, RT_G2_intron, RT_G2_intron: Reverse transcriptases (RTs) withgroup II intron origin. RT transcribes DNA using RNA astemplate. Proteins in this subfamily are found in bacterial andmitochondrial group II introns. Their most probable ancestorwas a retrotransposable element with both gag-like andpol-like genes. This subfamily of proteins appears to havecaptured the RT sequences from transpos…
MH0057.scaffold10334_1	1549	2184	-	NA	NA	NA	NA	NA
MH0057.scaffold10334_1	2234	3115	-	NA	NA	NA	NA	NA
MH0057.scaffold10334_1	3119	3661	-	NA	NA	NA	NA	NA
MH0057.scaffold10334_1	4158	6380	-	COG4943	[Signal transduction mechanisms]	0.029	NOT_PHAGE	Predicted signal transduction protein containing sensorand EAL domains .
MH0057.scaffold10334_1	6771	10304	-	COG5412	[Function unknown]	0.005	PHAGE	Phage-related protein .
MH0057.scaffold10334_1	10748	11080	-	NA	NA	NA	NA	NA
MH0057.scaffold10334_1	11551	11952	-	NA	NA	NA	NA	NA
MH0057.scaffold10334_1	12847	13158	-	NONE	NONE	0.003	PHAGE	pfam05135, Phage_QLRG, Phage QLRG family, putative DNA packaging. The members of this family contain a conserved QLRG motif. Thisfamily of phage proteins are largely uncharacterized, althougha phage related protein from Clostridium acetobutylicum andputative DNA packaging protein from Streptococcus phageDT1 suggest a role in DNA packaging. This family also containsDUF2472 members.
MH0057.scaffold10334_1	13184	14200	-	NA	NA	NA	NA	NA
MH0057.scaffold10334_1	14220	14792	-	NA	NA	NA	NA	NA
MH0057.scaffold10334_1	14916	15512	-	NONE	NONE	3e-07	PHAGE	pfam04233, Phage_Mu_F, Phage Mu protein F like protein. Members ofthis family are found in double-stranded DNA bacteriophages, andin some bacteria. A member of this family is required forviral head morphogenesis in bacteriophage SPP1. This familyis possibly a minor head protein. This family may berelated to the family TT_ORF1 (pfam02956).
MH0057.scaffold10334_1	15641	17167	-	NONE	NONE	1e-26	PHAGE	pfam05133, Phage_prot_Gp6, Phage portal protein, SPP1 Gp6-like. This protein forms a hole, or portal, that enables DNA passage duringpackaging and ejection. It also forms the junction betweenthe phage head (capsid) and the tail proteins. DuringSPP1 morphogenesis, Gp6 participates in the procapsid assemblyreaction. This family also includes family Phage_min_cap, pfam05126.
MH0057.scaffold10334_1	17220	18956	-	NONE	NONE	2e-07	PHAGE	TIGR01630, psiM2_ORF9, This model represents the C-terminal region ofa set of phage proteins typically about 400-500 amino acidsin length, although some members are considerably shorter. Anarticle on Methanobacterium phage Psi-M2 (PMID:9791169) callsthe member from that phage, ORF9, a putative large terminasesubunit, and ORF8 a candidate terminase small subunit.Most proteins in this family have a…
MH0057.scaffold10334_1	19182	19910	-	COG3617	[Transcription]	0.017	PHAGE	Prophage antirepressor .
MH0057.scaffold10334_1	20604	20981	+	NA	NA	NA	NA	NA
MH0057.scaffold10334_1	21567	22349	+	COG1674	[Cell division and chromosome partitioning]	6e-43	NOT_PHAGE	FtsK, DNA segregation ATPase FtsK/SpoIIIE and related proteins.
MH0057.scaffold10334_1	22959	23453	+	NA	NA	NA	NA	NA
MH0057.scaffold10334_1	23553	25097	-	COG3378	[General function prediction only]	3e-61	NOT_PHAGE	Predicted ATPase .
MH0057.scaffold10334_1	25457	26251	-	COG4983	[Function unknown]	3e-19	NOT_PHAGE	Uncharacterized conserved protein .
MH0057.scaffold10334_1	26259	26678	-	NA	NA	NA	NA	NA
MH0057.scaffold10334_1	26885	27295	-	NA	NA	NA	NA	NA
MH0057.scaffold10334_1	27312	29438	-	COG1328	[Nucleotidetransport and metabolism]	4e-96	NOT_PHAGE	NrdD, Oxygen-sensitive ribonucleoside-triphosphate reductase .
MH0057.scaffold10334_1	29934	30185	-	COG1694	[General function prediction only]	0.006	NOT_PHAGE	MazG, Predicted pyrophosphatase .
MH0057.scaffold10334_1	31072	31449	-	NA	NA	NA	NA	NA
MH0057.scaffold10334_1	31519	32016	-	NA	NA	NA	NA	NA
MH0057.scaffold10334_1	32031	32351	-	COG0270	[DNA replication, recombination, andrepair]	1e-06	NOT_PHAGE	Dcm, Site-specific DNA methylase .
MH0057.scaffold10334_1	32424	33149	-	COG0270	[DNA replication, recombination, andrepair]	2e-41	NOT_PHAGE	Dcm, Site-specific DNA methylase .
MH0057.scaffold10334_1	33146	34114	-	NONE	NONE	0.031	NOT_PHAGE	PRK05771, PRK05771, V-type ATP synthase subunit I; Validated.
MH0057.scaffold10334_1	34065	34712	+	NA	NA	NA	NA	NA
MH0057.scaffold10334_1	34741	34917	-	NONE	NONE	8e-08	PHAGE	pfam11753, DUF3310, Protein of unknwon function (DUF3310). This isa family of conserved bacteriophage proteins of unknown function.
MH0057.scaffold10334_1	34994	35743	-	NONE	NONE	7e-08	NOT_PHAGE	pfam04404, ERF, ERF superfamily. The DNA single-strand annealing proteins(SSAPs), such as RecT, Red-beta, ERF and Rad52, functionin RecA-dependent and RecA-independent DNA recombination pathways.This family includes proteins related to ERF.
MH0057.scaffold10334_1	35771	36196	-	NONE	NONE	7e-11	PHAGE	pfam11195, DUF2829, Protein of unknown function (DUF2829). This isa uncharacterized family of proteins found in bacteria andbacteriphages.
MH0057.scaffold10334_1	36467	38440	-	COG0417	[DNA replication,recombination, and repair]	0.0005	NOT_PHAGE	PolB, DNA polymerase elongation subunit (family B) .
MH0057.scaffold10334_1	38831	40216	-	COG1061	[Transcription /DNA replication, recombination, and repair]	4e-36	NOT_PHAGE	SSL2, DNA or RNA helicases of superfamily II .
MH0057.scaffold10334_1	40179	40598	-	COG1591	[DNAreplication, recombination, and repair]	0.016	NOT_PHAGE	Holliday junction resolvase - archaeal type .
MH0057.scaffold10334_1	40659	41246	-	NA	NA	NA	NA	NA
MH0086.scaffold103753_5	525	1160	-	NONE	NONE	0.003	NOT_PHAGE	pfam07173, DUF1399, Protein of unknown function (DUF1399). This family represents a conserved region approximately 150 residues long within a number of hypothetical plant proteins of unknown function.
MH0086.scaffold103753_5	5743	6429	-	NA	NA	NA	NA	NA
MH0086.scaffold103753_5	7334	7951	-	NA	NA	NA	NA	NA
MH0086.scaffold103753_5	9496	10608	-	COG1395	[Transcription]	3e-06	NOT_PHAGE	Predicted transcriptional regulator .
MH0086.scaffold103753_5	14298	14942	-	NA	NA	NA	NA	NA
MH0086.scaffold103753_5	16571	17365	+	COG3646	[Function unknown]	1e-14	PHAGE	Uncharacterized phage-encoded protein .
MH0086.scaffold103753_5	18591	19733	+	COG1475	[Transcription]	5e-07	NOT_PHAGE	Spo0J, Predicted transcriptional regulators .
MH0086.scaffold103753_5	19730	20578	+	NA	NA	NA	NA	NA
MH0086.scaffold103753_5	20593	21372	+	NA	NA	NA	NA	NA
MH0086.scaffold103753_5	22890	25691	+	NA	NA	NA	NA	NA
MH0074.scaffold6139_1	627	1364	-	COG0568	[Transcription]	4e-51	NOT_PHAGE	RpoD, DNA-directed RNA polymerase, sigma subunit (sigma70/sigma32) .
MH0074.scaffold6139_1	1332	1643	+	NA	NA	NA	NA	NA
MH0074.scaffold6139_1	1668	2195	-	NA	NA	NA	NA	NA
MH0074.scaffold6139_1	2259	3647	-	COG0017	[Translation, ribosomalstructure and biogenesis]	9e-147	NOT_PHAGE	AsnS, Aspartyl/asparaginyl-tRNA synthetases .
MH0074.scaffold6139_1	3796	4257	+	NA	NA	NA	NA	NA
MH0074.scaffold6139_1	5721	6125	+	NA	NA	NA	NA	NA
MH0074.scaffold6139_1	6197	7576	-	COG4262	[General function prediction only]	2e-12	NOT_PHAGE	Predicted spermidine synthase with an N-terminal membranedomain .
MH0074.scaffold6139_1	7587	8873	-	COG0366	[Carbohydrate transport and metabolism]	1e-35	NOT_PHAGE	AmyA, Glycosidases .
MH0074.scaffold6139_1	9083	9481	+	COG1937	NONE	2e-18	NOT_PHAGE	pfam02583, DUF156, Uncharacterized BCR, COG1937.
MH0074.scaffold6139_1	9749	10270	-	COG1437	[Nucleotide transportand metabolism]	8e-10	NOT_PHAGE	CyaB, Adenylate cyclase, class 2 (thermophilic) .
MH0074.scaffold6139_1	10368	10622	-	NONE	NONE	0.03	NOT_PHAGE	TIGR01989, COQ6, This model represents the monooxygenase responsible forthe 4-hydroxylateion of the phenol ring in the aerobic biosynthesisof ubiquinone.
MH0074.scaffold6139_1	10584	11102	+	NA	NA	NA	NA	NA
MH0074.scaffold6139_1	11214	12374	+	COG1454	[Energy production andconversion]	6e-109	NOT_PHAGE	EutG, Alcohol dehydrogenase, class IV .
MH0074.scaffold6139_1	12541	13269	+	COG2071	[General functionprediction only]	4e-31	NOT_PHAGE	Predicted glutamine amidotransferases .
MH0074.scaffold6139_1	13333	13668	-	COG0071	[Posttranslationalmodification, protein turnover, chaperones]	7e-20	NOT_PHAGE	IbpA, Molecular chaperone (small heat shock protein) .
MH0074.scaffold6139_1	13984	14289	+	NA	NA	NA	NA	NA
MH0074.scaffold6139_1	14781	15605	+	NA	NA	NA	NA	NA
MH0074.scaffold6139_1	15635	16462	-	COG4422	[Function unknown]	1e-12	PHAGE	Bacteriophage protein gp37 .
MH0074.scaffold6139_1	16530	16856	-	COG1733	[Transcription]	2e-29	NOT_PHAGE	Predicted transcriptional regulators .
MH0074.scaffold6139_1	17054	17419	+	COG3837	[Function unknown]	4e-17	NOT_PHAGE	Uncharacterized conserved protein, contains double-strandedbeta-helix domain .
V1.CD-13.scaffold99945_1	2706	3491	+	NA	NA	NA	NA	NA
V1.CD-13.scaffold99945_1	4431	6380	+	NA	NA	NA	NA	NA
V1.CD-13.scaffold99945_1	6377	7612	+	NA	NA	NA	NA	NA
V1.CD-13.scaffold99945_1	10567	11424	+	COG3728	[DNA replication, recombination, and repair]	1e-13	PHAGE	XtmA, Phage terminase, small subunit .
V1.CD-13.scaffold99945_1	11417	12733	+	COG1783	[General function prediction only]	8e-19	PHAGE	XtmB, Phage terminase large subunit .
V1.CD-13.scaffold99945_1	12737	14152	+	NONE	NONE	1e-46	PHAGE	TIGR01542, A118_put_portal, This model represents a family of phage minor structural proteins. The protein is suggested to be the head-tail connector, or portal protein, on the basis of its position in the phage gene order, its presence in mature phage, its size, and its conservation across a number of complete genomes of tailed phage that lack other candidate portal proteins. Several other known…
V1.CD-13.scaffold99945_1	14159	15565	+	NONE	NONE	2e-17	PHAGE	pfam06152, Phage_min_cap2, Phage minor capsid protein 2. Family of related phage minor capsid proteins.
V1.CD-13.scaffold99945_1	16480	17160	+	NONE	NONE	2e-21	NOT_PHAGE	pfam10543, ORF6N, ORF6N domain. This domain was identified by Iyer and colleagues.
V1.CD-13.scaffold99945_1	18642	19613	+	COG4653	[General function prediction only]	0.005	PHAGE	Predicted phage phi-C31 gp36 major capsid-like protein .
V1.CD-13.scaffold99945_1	23087	25801	+	COG5412	[Function unknown]	4e-05	PHAGE	Phage-related protein .
V1.CD-1.scaffold45234_1	657	1724	-	NA	NA	NA	NA	NA
V1.CD-1.scaffold45234_1	1769	2908	-	COG2932	[Transcription]	8e-08	NOT_PHAGE	Predicted transcriptional regulator .
V1.CD-1.scaffold45234_1	3159	3950	+	COG3646	[Function unknown]	1e-17	PHAGE	Uncharacterized phage-encoded protein .
V1.CD-1.scaffold45234_1	4348	4698	+	NA	NA	NA	NA	NA
V1.CD-1.scaffold45234_1	6127	7287	+	NONE	NONE	e-132	NOT_PHAGE	pfam10926, DUF2800, Protein of unknown function (DUF2800). This is a family of uncharacterized proteins found in bacteria and viruses. Some members of this family are annotated as being Phi APSE P51-like proteins.
V1.CD-1.scaffold45234_1	8305	10320	+	COG0749	[DNA replication, recombination, and repair]	3e-14	NOT_PHAGE	PolA, DNA polymerase I - 3'-5' exonuclease and polymerase domains .
V1.CD-1.scaffold45234_1	10547	11932	+	COG0507	[DNA replication, recombination, and repair]	9e-17	NOT_PHAGE	RecD, ATP-dependent exoDNAse (exonuclease V), alpha subunit - helicase superfamily I member .
V1.CD-1.scaffold45234_1	12069	14510	+	COG5545	[General function prediction only]	3e-49	NOT_PHAGE	Predicted P-loop ATPase and inactivated derivatives .
V1.CD-1.scaffold45234_1	15354	16748	+	COG0553	[Transcription / DNA replication, recombination, and repair]	2e-25	NOT_PHAGE	HepA, Superfamily II DNA/RNA helicases, SNF2 family .
V1.CD-1.scaffold45234_1	17829	18071	+	NONE	NONE	0.0003	PHAGE	pfam05119, Terminase_4, Phage terminase, small subunit.
V1.CD-1.scaffold45234_1	18068	19687	+	COG4626	[General function prediction only]	e-103	PHAGE	Phage terminase-like protein, large subunit .
V1.CD-1.scaffold45234_1	19732	20976	+	COG4695	[Function unknown]	6e-44	PHAGE	Phage-related protein .
V1.CD-1.scaffold45234_1	21597	22841	+	NONE	NONE	1e-19	PHAGE	pfam05065, Phage_capsid, Phage capsid family. Family of bacteriophage hypothetical proteins and capsid proteins.
V1.CD-1.scaffold45234_1	24343	24777	+	NONE	NONE	2e-08	PHAGE	pfam06199, Phage_tail_2, Phage major tail protein 2. characterized members are major tail proteins from various phage, including lactococcal temperate bacteriophage TP901-1.
V1.CD-1.scaffold45234_1	24796	25473	+	NA	NA	NA	NA	NA
V1.UC-8.scaffold20814_9	53	688	-	NA	NA	NA	NA	NA
V1.UC-8.scaffold20814_9	1888	2919	-	NA	NA	NA	NA	NA
V1.UC-8.scaffold20814_9	6617	7183	-	NA	NA	NA	NA	NA
V1.UC-8.scaffold20814_9	8006	8731	-	NA	NA	NA	NA	NA
V1.UC-8.scaffold20814_9	8797	9621	-	NA	NA	NA	NA	NA
V1.UC-8.scaffold20814_9	10924	11760	+	COG4021	[Function unknown]	1e-19	NOT_PHAGE	Uncharacterized conserved protein .
V1.CD-13.scaffold31449_2	2757	3392	+	NA	NA	NA	NA	NA
V1.CD-13.scaffold31449_2	3422	4408	+	NA	NA	NA	NA	NA
V1.CD-13.scaffold31449_2	7696	8409	+	NA	NA	NA	NA	NA
V1.CD-13.scaffold31449_2	12728	13630	+	NA	NA	NA	NA	NA
V1.CD-13.scaffold31449_2	14014	15204	+	NA	NA	NA	NA	NA
V1.CD-13.scaffold31449_2	17239	18417	+	COG1196	[Cell division and chromosome partitioning]	0.002	NOT_PHAGE	Smc, Chromosome segregation ATPases .
V1.CD-13.scaffold31449_2	19774	20634	+	NA	NA	NA	NA	NA
V1.CD-13.scaffold31449_2	23848	24639	+	NONE	NONE	0.045	NOT_PHAGE	pfam08192, Peptidase_S64, Peptidase family S64. This family of fungal proteins is involved in the processing of membrane bound transcription factor Stp1. The processing causes the signalling domain of Stp1 to be passed to the nucleus where several permease genes are induced. The permeases are important for uptake of amino acids, and processing of tp1 only occurs in an amino acid-rich environment.…
V1.CD-13.scaffold31449_2	24823	25350	+	NA	NA	NA	NA	NA
V1.CD-13.scaffold31449_2	34426	35412	-	NA	NA	NA	NA	NA
V1.CD-13.scaffold31449_2	35402	36301	-	COG1409	[General function prediction only]	0.004	NOT_PHAGE	Icc, Predicted phosphohydrolases .
V1.CD-13.scaffold31449_2	36338	37249	-	COG0464	[Posttranslational modification, protein turnover, chaperones]	2e-07	NOT_PHAGE	SpoVK, ATPases of the AAA+ class .
V1.CD-13.scaffold31449_2	37593	38600	-	COG0358	[DNA replication, recombination, and repair]	6e-05	NOT_PHAGE	DnaG, DNA primase (bacterial type) .
V1.CD-13.scaffold31449_2	39010	39804	-	NA	NA	NA	NA	NA
V1.CD-13.scaffold31449_2	39807	40955	-	COG0714	[General function prediction only]	2e-10	NOT_PHAGE	MoxR-like ATPases .
V1.CD-13.scaffold31449_2	41696	42436	-	NONE	NONE	0.02	PHAGE	TIGR01618, phage_P_loop, This model represents an uncharacterized family of proteins from a number of phage of Gram-positive bacteria. This protein contains a P-loop motif, G/A-X-X-G-X-G-K-T near its amino end. The function of this protein is unknown.
V1.CD-13.scaffold31449_2	43065	44072	-	COG0305	[DNA replication, recombination, and repair]	2e-07	NOT_PHAGE	DnaB, Replicative DNA helicase .
V1.CD-13.scaffold31449_2	44646	46643	-	COG0417	[DNA replication, recombination, and repair]	2e-05	NOT_PHAGE	PolB, DNA polymerase elongation subunit (family B) .
V1.CD-13.scaffold31449_2	46968	47693	-	NA	NA	NA	NA	NA
MH0082.scaffold54315_2	347	745	+	NA	NA	NA	NA	NA
MH0082.scaffold54315_2	978	1655	+	COG0175	[Amino acid transport and metabolism / Coenzyme metabolism]	0.0005	NOT_PHAGE	CysH, 3'-phosphoadenosine 5'-phosphosulfate sulfotransferase (PAPS reductase)/FAD synthetase and related enzymes .
MH0082.scaffold54315_2	1667	2083	+	COG4933	[Function unknown]	1e-07	NOT_PHAGE	Uncharacterized conserved protein .
MH0082.scaffold54315_2	2071	2598	+	NA	NA	NA	NA	NA
MH0082.scaffold54315_2	2549	3214	+	NA	NA	NA	NA	NA
MH0082.scaffold54315_2	3201	3512	+	NA	NA	NA	NA	NA
MH0082.scaffold54315_2	3695	4162	+	NA	NA	NA	NA	NA
MH0082.scaffold54315_2	4159	4500	+	NA	NA	NA	NA	NA
MH0082.scaffold54315_2	5300	5824	-	NA	NA	NA	NA	NA
MH0082.scaffold54315_2	6118	7293	+	COG1783	[General function prediction only]	1e-06	PHAGE	XtmB, Phage terminase large subunit .
MH0082.scaffold54315_2	7329	8678	+	NONE	NONE	2e-30	PHAGE	TIGR01542, A118_put_portal, This model represents a family of phage minor structural proteins. The protein is suggested to be the head-tail connector, or portal protein, on the basis of its position in the phage gene order, its presence in mature phage, its size, and its conservation across a number of complete genomes of tailed phage that lack other candidate portal proteins. Several other known…
MH0082.scaffold54315_2	8807	9217	+	NA	NA	NA	NA	NA
MH0082.scaffold54315_2	9202	9942	+	NA	NA	NA	NA	NA
MH0082.scaffold54315_2	9951	10259	+	NA	NA	NA	NA	NA
MH0082.scaffold54315_2	10320	12044	+	NONE	NONE	4e-30	PHAGE	pfam06152, Phage_min_cap2, Phage minor capsid protein 2. Family of related phage minor capsid proteins.
MH0082.scaffold54315_2	12157	12474	+	NONE	NONE	6e-08	PHAGE	pfam09639, YjcQ, YjcQ protein. YjcQ is a protein of approx. 100 residues containing four alpha helices and three beta strands. It is expressed in bacteria and also in viruses. It appears to be under the regulation of SigD RNA polymerase which is responsible for the expression of many genes encoding cell-surface proteins related to flagellar assembly, motility, chemotaxis and autolysis in the late…
MH0082.scaffold54315_2	12806	13381	+	NONE	NONE	2e-15	PHAGE	pfam06810, Phage_GP20, Phage minor structural protein GP20. This family consists of several phage minor structural protein GP20 sequences of around 180 residues in length. The function of this family is unknown.
MH0083.scaffold14109_3	424	1644	-	NA	NA	NA	NA	NA
MH0083.scaffold14109_3	2971	3102	-	NONE	NONE	0.008	NOT_PHAGE	pfam09643, YopX, YopX protein. YopX is a protein that is largely helical, with three identical chains probably complexing into a twelve-chain structure.
MH0083.scaffold14109_3	3353	4021	-	NA	NA	NA	NA	NA
MH0083.scaffold14109_3	5694	6431	-	COG1484	[DNA replication, recombination, and repair]	3e-18	NOT_PHAGE	DnaC, DNA replication protein .
MH0083.scaffold14109_3	6433	7191	-	NA	NA	NA	NA	NA
MH0083.scaffold14109_3	7563	8297	-	COG3646	[Function unknown]	7e-16	PHAGE	Uncharacterized phage-encoded protein .
MH0083.scaffold14109_3	8392	9021	-	NONE	NONE	2e-27	PHAGE	pfam06147, DUF968, Protein of unknown function (DUF968). Family of uncharacterized prophage proteins that are also found in bacteria and eukaryotes.
MH0083.scaffold14109_3	9551	10153	-	COG3481	[General function prediction only]	9e-10	NOT_PHAGE	Predicted HD-superfamily hydrolase .
MH0071.scaffold22053_5	994	1596	+	NA	NA	NA	NA	NA
MH0071.scaffold22053_5	1888	2643	+	COG1475	[Transcription]	6e-10	NOT_PHAGE	Spo0J, Predicted transcriptional regulators .
MH0071.scaffold22053_5	2633	3499	+	NA	NA	NA	NA	NA
MH0071.scaffold22053_5	3503	4465	+	COG0535	[General function prediction only]	3e-12	NOT_PHAGE	Predicted Fe-S oxidoreductases .
MH0071.scaffold22053_5	4953	6398	+	COG5362	[General function prediction only]	8e-25	PHAGE	Phage-related terminase .
MH0071.scaffold22053_5	6409	7806	+	COG4383	[Function unknown]	0.003	PHAGE	Mu-like prophage protein gp29 .
MH0071.scaffold22053_5	7809	8768	+	NONE	NONE	2e-05	PHAGE	pfam04233, Phage_Mu_F, Phage Mu protein F like protein. Members of this family are found in double-stranded DNA bacteriophages, and in some bacteria. A member of this family is required for viral head morphogenesis in bacteriophage SPP1. This family is possibly a minor head protein. This family may be related to the family TT_ORF1 (pfam02956).
MH0071.scaffold22053_5	8784	9254	+	NA	NA	NA	NA	NA
V1.UC-10.scaffold27570_5	350	658	+	NONE	NONE	0.0007	PHAGE	pfam09682, Holin_LLH, Phage holin protein (Holin_LLH). This entry identifies a family of putative phage holin from a number of phage and prophage regions of Gram-positive bacteria. Like other holins, it is small (about 100 amino acids) with stretches of hydrophobic sequence and is encoded adjacent to lytic enzymes.
V1.UC-10.scaffold27570_5	1602	1775	+	NONE	NONE	0.0002	NOT_PHAGE	pfam07927, YcfA, YcfA-like protein. The viral, archaeal and bacterial proteins making up this family are similar to the YcfA protein expressed by E. coli. Most of these proteins are hypothetical proteins of unknown function.
V1.UC-10.scaffold27570_5	1978	2601	-	NA	NA	NA	NA	NA
V1.UC-10.scaffold27570_5	2652	3533	+	COG2826	[DNA replication, recombination, and repair]	3e-51	NOT_PHAGE	Tra8, Transposase and inactivated derivatives, IS30 family .
V1.UC-10.scaffold27570_5	3697	3930	+	COG2826	[DNA replication, recombination, and repair]	3e-05	NOT_PHAGE	Tra8, Transposase and inactivated derivatives, IS30 family .
V1.UC-10.scaffold27570_5	4625	5356	+	COG3773	[Cell envelope biogenesis, outer membrane]	6e-06	NOT_PHAGE	SleB, Cell wall hydrolyses involved in spore germination .
V1.UC-10.scaffold27570_5	5371	5673	+	NA	NA	NA	NA	NA
V1.UC-10.scaffold27570_5	5952	6626	+	NA	NA	NA	NA	NA
V1.UC-10.scaffold27570_5	6847	7071	+	NONE	NONE	6e-06	PHAGE	pfam05869, Dam, DNA N-6-adenine-methyltransferase (Dam). This family consists of several bacterial and phage DNA N-6-adenine-methyltransferase (Dam) like sequences.
V1.UC-10.scaffold27570_5	7291	7716	+	NA	NA	NA	NA	NA
V1.UC-10.scaffold27570_5	7735	8067	+	NA	NA	NA	NA	NA
V1.UC-10.scaffold27570_5	8070	8954	+	NONE	NONE	7e-18	PHAGE	pfam11753, DUF3310, Protein of unknwon function (DUF3310). This is a family of conserved bacteriophage proteins of unknown function.
V1.UC-10.scaffold27570_5	9117	9476	+	NA	NA	NA	NA	NA
V1.UC-10.scaffold27570_5	9613	10353	+	NA	NA	NA	NA	NA
V1.UC-10.scaffold27570_5	10708	11403	+	COG0863	[DNA replication, recombination, and repair]	8e-14	NOT_PHAGE	DNA modification methylase .
V1.UC-10.scaffold27570_5	11400	11747	+	NA	NA	NA	NA	NA
V1.UC-10.scaffold27570_5	11833	12126	+	NONE	NONE	9e-12	NOT_PHAGE	pfam08774, VRR_NUC, VRR-NUC domain.
V1.CD-8.scaffold4416_3	154	579	+	NONE	NONE	6e-27	PHAGE	pfam10934, DUF2634, Protein of unknown function (DUF2634). Some members in this family of proteins are annotated as phage related, xkdS however currently there is no known function.
V1.CD-8.scaffold4416_3	579	1688	+	COG3299	[Function unknown]	4e-37	PHAGE	XkdT, Uncharacterized homolog of phage Mu protein gp47 .
V1.CD-8.scaffold4416_3	1685	2395	+	NONE	NONE	2e-14	PHAGE	pfam10076, DUF2313, Uncharacterized protein conserved in bacteria (DUF2313). Members of this family of proteins comprise various hypothetical and putative bacteriophage tail proteins.
V1.CD-8.scaffold4416_3	2386	3342	+	NA	NA	NA	NA	NA
V1.CD-8.scaffold4416_3	3354	4928	+	NONE	NONE	6e-16	NOT_PHAGE	PHA00653, mtd, major tropism determinant.
V1.CD-8.scaffold4416_3	5281	6294	+	NONE	NONE	6e-29	NOT_PHAGE	cd01651, RT_G2_intron, RT_G2_intron: Reverse transcriptases (RTs) with group II intron origin. RT transcribes DNA using RNA as template. Proteins in this subfamily are found in bacterial and mitochondrial group II introns. Their most probable ancestor was a retrotransposable element with both gag-like and pol-like genes. This subfamily of proteins appears to have captured the RT sequences from tr…
V1.CD-8.scaffold4416_3	7763	7951	+	COG1705	[Cell motility and secretion / Intracellular trafficking and secretion]	0.001	NOT_PHAGE	FlgJ, Muramidase (flagellum-specific) .
V1.CD-8.scaffold4416_3	8086	8469	+	NONE	NONE	0.006	NOT_PHAGE	PRK12704, PRK12704, phosphodiesterase; Provisional.
V1.CD-8.scaffold4416_3	8507	9265	-	NA	NA	NA	NA	NA
V1.CD-8.scaffold4416_3	9239	10144	+	COG1757	[Energy production and conversion]	7e-20	NOT_PHAGE	NhaC, Na+/H+ antiporter .
V1.CD-8.scaffold4416_3	10510	10812	-	NA	NA	NA	NA	NA
V1.CD-8.scaffold4416_3	10825	11445	-	COG4783	[General function prediction only]	0.017	NOT_PHAGE	Putative Zn-dependent protease, contains TPR repeats .
MH0082.scaffold18170_3	397	1089	+	NA	NA	NA	NA	NA
MH0082.scaffold18170_3	1354	2649	+	COG1262	[Function unknown]	0.043	NOT_PHAGE	Uncharacterized conserved protein .
MH0082.scaffold18170_3	2642	3385	+	COG2176	[DNA replication, recombination, and repair]	5e-18	NOT_PHAGE	PolC, DNA polymerase III, alpha subunit (gram-positive type) .
MH0082.scaffold18170_3	3388	4149	+	COG3773	[Cell envelope biogenesis, outer membrane]	0.005	NOT_PHAGE	SleB, Cell wall hydrolyses involved in spore germination .
MH0082.scaffold18170_3	4109	4969	+	NONE	NONE	3e-19	NOT_PHAGE	pfam04404, ERF, ERF superfamily. The DNA single-strand annealing proteins (SSAPs), such as RecT, Red-beta, ERF and Rad52, function in RecA-dependent and RecA-independent DNA recombination pathways. This family includes proteins related to ERF.
MH0082.scaffold18170_3	4992	5384	+	COG0629	[DNA replication, recombination, and repair]	2e-19	NOT_PHAGE	Ssb, Single-stranded DNA-binding protein .
MH0082.scaffold18170_3	5453	6367	+	NA	NA	NA	NA	NA
MH0082.scaffold18170_3	6364	7047	+	NONE	NONE	1e-07	PHAGE	pfam11417, Inhibitor_G39P, Loader and inhibitor of phage G40P. G39P inhibits the initiation of DNA replication by blocking G40P replicative helicase. G39P has a bipartite stricture consisting of a folded N-terminal domain and an unfolded C-terminal domain. The C terminal is essential for helicase interaction.
MH0082.scaffold18170_3	7044	7913	+	COG0863	[DNA replication, recombination, and repair]	1e-30	NOT_PHAGE	DNA modification methylase .
MH0082.scaffold18170_3	7910	8440	+	NA	NA	NA	NA	NA
MH0082.scaffold18170_3	8437	9045	+	COG3331	[General function prediction only]	3e-06	NOT_PHAGE	PrfA, Penicillin-binding protein-related factor A, putative recombinase .
MH0082.scaffold18170_3	9318	10061	+	NONE	NONE	8e-33	PHAGE	pfam05869, Dam, DNA N-6-adenine-methyltransferase (Dam). This family consists of several bacterial and phage DNA N-6-adenine-methyltransferase (Dam) like sequences.
MH0082.scaffold18170_3	10015	10488	+	NA	NA	NA	NA	NA
MH0042.scaffold38994_2	2183	4144	+	COG1196	[Cell division and chromosomepartitioning]	4e-09	NOT_PHAGE	Smc, Chromosome segregation ATPases .
MH0042.scaffold38994_2	4153	5091	+	COG3723	[DNAreplication, recombination, and repair]	8e-50	NOT_PHAGE	RecT, Recombinational DNA repair protein (RecE pathway) .
MH0042.scaffold38994_2	5098	5826	+	COG0595	[General function prediction only]	4e-08	NOT_PHAGE	Predicted hydrolase of the metallo-beta-lactamase superfamily.
MH0042.scaffold38994_2	6394	7023	+	NA	NA	NA	NA	NA
MH0042.scaffold38994_2	7527	8285	+	NA	NA	NA	NA	NA
MH0042.scaffold38994_2	8333	9148	+	NA	NA	NA	NA	NA
MH0042.scaffold38994_2	9105	9728	+	COG1484	[DNA replication, recombination, andrepair]	5e-12	NOT_PHAGE	DnaC, DNA replication protein .
MH0042.scaffold38994_2	10619	11434	+	COG1475	[Transcription]	7e-07	NOT_PHAGE	Spo0J, Predicted transcriptional regulators .
MH0042.scaffold38994_2	11787	12797	+	COG0820	[General functionprediction only]	3e-31	NOT_PHAGE	Predicted Fe-S-cluster redox enzyme .
MH0042.scaffold38994_2	14421	15536	+	COG1475	[Transcription]	2e-05	NOT_PHAGE	Spo0J, Predicted transcriptional regulators .
MH0042.scaffold38994_2	15543	16148	+	NA	NA	NA	NA	NA
MH0042.scaffold38994_2	16982	18412	+	COG1783	[General function predictiononly]	0.009	PHAGE	XtmB, Phage terminase large subunit .
MH0042.scaffold38994_2	18428	19852	+	NONE	NONE	1e-21	PHAGE	pfam05133, Phage_prot_Gp6, Phage portal protein, SPP1 Gp6-like. This protein forms a hole, or portal, that enables DNA passage duringpackaging and ejection. It also forms the junction betweenthe phage head (capsid) and the tail proteins. DuringSPP1 morphogenesis, Gp6 participates in the procapsid assemblyreaction. This family also includes family Phage_min_cap, pfam05126.
MH0042.scaffold38994_2	20315	22924	+	NONE	NONE	3e-10	NOT_PHAGE	cd00233, VIP2, VIP2; A family of actin-ADP-ribosylating toxin. Amember of the Bacillus-prodiced vegetative insecticidal proteins(VIPs) possesses high specificity against the major insectpest, corn rootworms, and belongs to a classs of binary toxinsand regulators of biological pathways distinct from classicalA-B toxins. A novel family of insecticidal ADP-ribosyltransferses wereisolated from Bacill…
MH0042.scaffold38994_2	23311	24138	-	COG1397	[Posttranslational modification, proteinturnover, chaperones]	9e-36	NOT_PHAGE	DraG, ADP-ribosylglycohydrolase .
MH0042.scaffold38994_2	25553	26356	-	COG0270	[DNA replication, recombination, andrepair]	1e-22	NOT_PHAGE	Dcm, Site-specific DNA methylase .
MH0042.scaffold38994_2	29098	29622	+	NA	NA	NA	NA	NA
MH0042.scaffold38994_2	29631	30278	+	NA	NA	NA	NA	NA
MH0042.scaffold38994_2	30298	31533	+	NA	NA	NA	NA	NA
MH0042.scaffold38994_2	34024	34680	+	NA	NA	NA	NA	NA
MH0042.scaffold38994_2	34913	40324	+	COG3941	[General function predictiononly]	3e-10	PHAGE	Mu-like prophage protein .
MH0042.scaffold38994_2	40528	40836	+	NA	NA	NA	NA	NA
MH0042.scaffold38994_2	40838	42022	+	NA	NA	NA	NA	NA
MH0042.scaffold38994_2	42004	47409	+	NA	NA	NA	NA	NA
MH0042.scaffold38994_2	48278	49636	+	NA	NA	NA	NA	NA
MH0042.scaffold38994_2	49968	51155	+	NONE	NONE	3e-25	NOT_PHAGE	cd01651, RT_G2_intron, RT_G2_intron: Reverse transcriptases (RTs) withgroup II intron origin. RT transcribes DNA using RNA astemplate. Proteins in this subfamily are found in bacterial andmitochondrial group II introns. Their most probable ancestorwas a retrotransposable element with both gag-like andpol-like genes. This subfamily of proteins appears to havecaptured the RT sequences from transpos…
MH0042.scaffold38994_2	51543	51923	+	NA	NA	NA	NA	NA
MH0042.scaffold38994_2	51920	52519	+	NA	NA	NA	NA	NA
MH0042.scaffold38994_2	52516	53112	+	COG0860	[Cell envelope biogenesis,outer membrane]	8e-21	NOT_PHAGE	AmiC, N-acetylmuramoyl-L-alanine amidase .
MH0042.scaffold38994_2	53102	53719	+	NA	NA	NA	NA	NA
MH0071.scaffold389_1	857	1645	+	COG4983	[Function unknown]	3e-23	NOT_PHAGE	Uncharacterized conserved protein .
MH0071.scaffold389_1	1936	2238	+	COG2337	[Signal transduction mechanisms]	0.016	NOT_PHAGE	MazF, Growth inhibitor .
MH0071.scaffold389_1	2250	2873	+	COG1351	[Nucleotide transport and metabolism]	2e-31	NOT_PHAGE	THY1, Predicted alternative thymidylate synthase .
MH0071.scaffold389_1	3355	4830	+	COG3378	[General function prediction only]	6e-51	NOT_PHAGE	Predicted ATPase .
MH0071.scaffold389_1	4832	5455	+	NA	NA	NA	NA	NA
MH0071.scaffold389_1	5443	5784	+	NONE	NONE	0.004	NOT_PHAGE	PRK13795, PRK13795, hypothetical protein; Provisional.
MH0071.scaffold389_1	5861	6016	+	COG1690	[Function unknown]	0.013	NOT_PHAGE	RtcB, Uncharacterized conserved protein .
MH0071.scaffold389_1	6426	7001	+	NA	NA	NA	NA	NA
MH0071.scaffold389_1	9901	10419	+	COG1961	[DNA replication, recombination, and repair]	1e-22	NOT_PHAGE	PinR, Site-specific recombinases, DNA invertase Pin homologs .
MH0071.scaffold389_1	10536	11111	+	NA	NA	NA	NA	NA
MH0071.scaffold389_1	11252	12832	+	COG1061	[Transcription / DNA replication, recombination, and repair]	0.045	NOT_PHAGE	SSL2, DNA or RNA helicases of superfamily II .
MH0071.scaffold389_1	13261	14481	+	NONE	NONE	6e-28	PHAGE	pfam05133, Phage_prot_Gp6, Phage portal protein, SPP1 Gp6-like. This protein forms a hole, or portal, that enables DNA passage during packaging and ejection. It also forms the junction between the phage head (capsid) and the tail proteins. During SPP1 morphogenesis, Gp6 participates in the procapsid assembly reaction. This family also includes family Phage_min_cap, pfam05126.
MH0071.scaffold389_1	14579	15178	+	NONE	NONE	0.024	NOT_PHAGE	pfam11262, Tho2, Transcription factor/nuclear export subunit protein 2. THO and TREX form a eukaryotic complex which functions in messenger ribonucleoprotein metabolism and plays a role in preventing the transcription-associated genetic instability. Tho2, along with four other subunits forms THO.
MH0071.scaffold389_1	15178	16098	+	NA	NA	NA	NA	NA
MH0071.scaffold389_1	16110	16433	+	NONE	NONE	0.0007	PHAGE	pfam05135, Phage_QLRG, Phage QLRG family, putative DNA packaging. The members of this family contain a conserved QLRG motif. This family of phage proteins are largely uncharacterized, although a phage related protein from Clostridium acetobutylicum and putative DNA packaging protein from Streptococcus phage DT1 suggest a role in DNA packaging. This family also contains DUF2472 members.
MH0071.scaffold389_1	16442	16840	+	NA	NA	NA	NA	NA
MH0071.scaffold389_1	16827	17360	+	NA	NA	NA	NA	NA
MH0071.scaffold389_1	17357	17761	+	NA	NA	NA	NA	NA
MH0071.scaffold389_1	17798	18196	+	NONE	NONE	0.006	PHAGE	pfam08813, Phage_tail_3, Phage tail protein. This family of proteins include phage tail proteins. They probably include bacterial Ig-like domains related to pfam02368. Which also includes a number of phage tail invasin proteins.
MH0071.scaffold389_1	18219	18548	+	NA	NA	NA	NA	NA
MH0071.scaffold389_1	18859	20751	-	NA	NA	NA	NA	NA
MH0071.scaffold389_1	20734	23169	+	NONE	NONE	0.0003	NOT_PHAGE	pfam04600, DUF571, Protein of unknown function (DUF571). Family of hypothetical bacterial proteins.
MH0038.scaffold25033_2	2948	3715	+	COG3723	[DNA replication, recombination, and repair]	1e-33	NOT_PHAGE	RecT, Recombinational DNA repair protein (RecE pathway) .
MH0038.scaffold25033_2	3904	4848	+	COG5377	[DNA replication, recombination, and repair]	4e-16	PHAGE	Phage-related protein, predicted endonuclease .
MH0038.scaffold25033_2	5245	6213	+	NA	NA	NA	NA	NA
MH0038.scaffold25033_2	6221	6898	+	NA	NA	NA	NA	NA
MH0038.scaffold25033_2	7321	8007	+	COG0863	[DNA replication, recombination, and repair]	3e-15	NOT_PHAGE	DNA modification methylase .
MH0038.scaffold25033_2	9610	10293	+	NA	NA	NA	NA	NA
MH0038.scaffold25033_2	12077	12694	+	NONE	NONE	0.002	NOT_PHAGE	PTZ00268, PTZ00268, glycosylphosphatidylinositol-specific phospholipase C; Provisional.
MH0038.scaffold25033_2	15526	16719	-	NA	NA	NA	NA	NA
MH0038.scaffold25033_2	17217	18002	-	NA	NA	NA	NA	NA
MH0038.scaffold25033_2	18005	18856	-	NA	NA	NA	NA	NA
MH0038.scaffold25033_2	19233	19865	-	NA	NA	NA	NA	NA
MH0038.scaffold25033_2	20606	21319	-	NA	NA	NA	NA	NA
MH0038.scaffold25033_2	21307	22425	-	NA	NA	NA	NA	NA
MH0038.scaffold25033_2	22422	23204	-	NA	NA	NA	NA	NA
MH0009.scaffold32655_3	1571	2329	-	NONE	NONE	4e-07	NOT_PHAGE	pfam07463, NUMOD4, NUMOD4 motif. NUMOD4 is a putative DNA-binding motif found in homing endonucleases and related proteins.
MH0009.scaffold32655_3	17591	18991	+	NONE	NONE	0.029	NOT_PHAGE	PRK04031, PRK04031, DNA primase; Provisional.
MH0009.scaffold32655_3	23838	25097	+	COG1164	[Amino acid transport and metabolism]	0.021	NOT_PHAGE	Oligoendopeptidase F .
MH0009.scaffold32655_3	25251	27158	+	COG0417	[DNA replication, recombination, and repair]	6e-05	NOT_PHAGE	PolB, DNA polymerase elongation subunit (family B) .
MH0009.scaffold32655_3	27761	28690	+	COG0305	[DNA replication, recombination, and repair]	2e-12	NOT_PHAGE	DnaB, Replicative DNA helicase .
MH0009.scaffold32655_3	29319	30062	+	COG0464	[Posttranslational modification, protein turnover, chaperones]	0.041	NOT_PHAGE	SpoVK, ATPases of the AAA+ class .
MH0009.scaffold32655_3	30080	30718	+	NA	NA	NA	NA	NA
MH0032.scaffold7595_3	429	1217	-	COG0463	[Cellenvelope biogenesis, outer membrane]	3e-15	NOT_PHAGE	WcaA, Glycosyltransferases involved in cell wall biogenesis .
MH0032.scaffold7595_3	1805	2965	-	COG0438	[Cell envelope biogenesis, outermembrane]	2e-30	NOT_PHAGE	RfaG, Glycosyltransferase .
MH0032.scaffold7595_3	2980	4155	-	COG0438	[Cell envelope biogenesis, outermembrane]	6e-19	NOT_PHAGE	RfaG, Glycosyltransferase .
MH0032.scaffold7595_3	4172	5254	-	NONE	NONE	0.0008	NOT_PHAGE	cd03794, GT1_wbuB_like, This family is most closely related to theGT1 family of glycosyltransferases. wbuB in E. coli is involvedin the biosynthesis of the O26 O-antigen. It has beenproposed to function as an N-acetyl-L-fucosamine (L-FucNAc) transferase..
MH0032.scaffold7595_3	5251	6168	-	COG3594	[Carbohydratetransport and metabolism]	2e-13	NOT_PHAGE	NolL, Fucose 4-O-acetylase and related acetyltransferases .
MH0032.scaffold7595_3	6155	7354	-	NA	NA	NA	NA	NA
MH0032.scaffold7595_3	7359	8666	-	COG0438	[Cell envelope biogenesis, outermembrane]	1e-15	NOT_PHAGE	RfaG, Glycosyltransferase .
MH0032.scaffold7595_3	8648	9685	-	NONE	NONE	3e-08	NOT_PHAGE	pfam04230, PS_pyruv_trans, Polysaccharide pyruvyl transferase. Pyruvyl-transferases involved in peptidoglycan-associated polymerbiosynthesis. CsaB in Bacillus anthracis is necessary forthe non-covalent anchoring of proteins containing an SLH(S-layer homology) domain to peptidoglycan-associated pyruvylated polysaccharides.WcaK and AmsJ are involved in the biosynthesisof colanic acid in Escherichia…
MH0032.scaffold7595_3	9682	10851	-	COG0438	[Cell envelope biogenesis, outermembrane]	4e-22	NOT_PHAGE	RfaG, Glycosyltransferase .
MH0032.scaffold7595_3	10877	12058	-	COG0438	[Cell envelope biogenesis, outermembrane]	2e-19	NOT_PHAGE	RfaG, Glycosyltransferase .
MH0032.scaffold7595_3	12087	12425	-	NA	NA	NA	NA	NA
MH0032.scaffold7595_3	13484	14401	-	NONE	NONE	0.0001	NOT_PHAGE	pfam04230, PS_pyruv_trans, Polysaccharide pyruvyl transferase. Pyruvyl-transferases involved in peptidoglycan-associated polymerbiosynthesis. CsaB in Bacillus anthracis is necessary forthe non-covalent anchoring of proteins containing an SLH(S-layer homology) domain to peptidoglycan-associated pyruvylated polysaccharides.WcaK and AmsJ are involved in the biosynthesisof colanic acid in Escherichia…
MH0032.scaffold7595_3	14394	15932	-	COG0534	[Defense mechanisms]	4e-05	NOT_PHAGE	NorM, Na+-driven multidrug efflux pump .
MH0032.scaffold7595_3	15948	16922	-	COG3594	[Carbohydratetransport and metabolism]	0.002	NOT_PHAGE	NolL, Fucose 4-O-acetylase and related acetyltransferases .
MH0032.scaffold7595_3	17313	18011	-	COG4464	[Carbohydrate transportand metabolism / Cell envelope biogenesis, outermembrane]	2e-25	NOT_PHAGE	CapC, Capsular polysaccharide biosynthesis protein .
MH0032.scaffold7595_3	18077	20491	-	COG0489	[Cell divisionand chromosome partitioning]	4e-29	NOT_PHAGE	Mrp, ATPases involved in chromosome partitioning .
MH0032.scaffold7595_3	20506	21297	-	COG1596	[Cell envelope biogenesis, outer membrane]	3e-15	NOT_PHAGE	Wza, Periplasmic protein involved in polysaccharide export.
MH0032.scaffold7595_3	21311	22432	-	COG0472	[Cell envelopebiogenesis, outer membrane]	4e-28	NOT_PHAGE	Rfe, UDP-N-acetylmuramyl pentapeptide phosphotransferase/UDP-N- acetylglucosamine-1-phosphatetransferase .
MH0032.scaffold7595_3	22522	23094	+	NA	NA	NA	NA	NA
MH0032.scaffold7595_3	24429	24851	+	NA	NA	NA	NA	NA
MH0032.scaffold7595_3	23835	24470	-	NONE	NONE	3e-12	PHAGE	cd01182, INT_REC_C, DNA breaking-rejoining enzymes, intergrase/recombinases, C-terminalcatalytic domain. The tyrosine recombinase/integrase familyshare the same catalytic domain containing sixconserved active site residues. The best-studied membersof this diverse family include the bacteriophage lambdaintegrase, the bacteriophage P1 Cre recombinase, the yeastFlp recombinase and the bacterial XerD…
V1.UC-19.scaffold36192_1	1093	1866	-	NA	NA	NA	NA	NA
V1.UC-19.scaffold36192_1	1872	3731	-	NA	NA	NA	NA	NA
V1.UC-19.scaffold36192_1	4130	4489	+	NA	NA	NA	NA	NA
V1.UC-19.scaffold36192_1	3734	4168	-	NA	NA	NA	NA	NA
V1.UC-19.scaffold36192_1	4498	7104	-	COG1196	[Cell division and chromosome partitioning]	1e-09	NOT_PHAGE	Smc, Chromosome segregation ATPases .
V1.UC-19.scaffold36192_1	7532	8029	-	NONE	NONE	0.017	NOT_PHAGE	PRK01966, ddl, D-alanyl-alanine synthetase A; Reviewed.
V1.UC-19.scaffold36192_1	8053	8526	-	NA	NA	NA	NA	NA
V1.UC-19.scaffold36192_1	8992	9423	-	NA	NA	NA	NA	NA
V1.UC-19.scaffold36192_1	9453	10193	-	NA	NA	NA	NA	NA
V1.UC-19.scaffold36192_1	11087	11575	+	NA	NA	NA	NA	NA
V1.UC-19.scaffold36192_1	10649	11083	-	NA	NA	NA	NA	NA
V1.UC-19.scaffold36192_1	11752	12846	-	COG0740	[Posttranslational modification, protein turnover, chaperones / Intracellular trafficking and secretion]	1e-21	NOT_PHAGE	ClpP, Protease subunit of ATP-dependent Clp proteases .
V1.UC-19.scaffold36192_1	12914	14416	-	COG5511	[General function prediction only]	4e-13	PHAGE	Bacteriophage capsid protein .
V1.UC-19.scaffold36192_1	14799	16544	-	COG5525	[General function prediction only]	6e-30	PHAGE	Bacteriophage tail assembly protein .
V1.UC-19.scaffold36192_1	16537	17076	-	NA	NA	NA	NA	NA
V1.UC-19.scaffold36192_1	17034	17510	+	NA	NA	NA	NA	NA
V1.UC-19.scaffold36192_1	18577	18948	+	COG1598	[Function unknown]	3e-10	NOT_PHAGE	Uncharacterized conserved protein .
V1.UC-19.scaffold36192_1	19407	20960	+	NONE	NONE	0.049	NOT_PHAGE	pfam02195, ParBc, ParB-like nuclease domain.
V1.UC-19.scaffold36192_1	20923	21819	-	COG0338	[DNA replication, recombination, and repair]	4e-23	NOT_PHAGE	Dam, Site-specific DNA methylase .
V1.UC-19.scaffold36192_1	23251	24108	+	COG0270	[DNA replication, recombination, and repair]	2e-08	NOT_PHAGE	Dcm, Site-specific DNA methylase .
V1.UC-19.scaffold36192_1	24306	24665	+	NA	NA	NA	NA	NA
MH0071.scaffold943_7	1413	2081	+	NA	NA	NA	NA	NA
MH0071.scaffold943_7	2078	3301	+	COG0305	[DNA replication, recombination, and repair]	2e-48	NOT_PHAGE	DnaB, Replicative DNA helicase .
MH0071.scaffold943_7	3311	4228	+	COG1032	[Energy production and conversion]	0.0008	NOT_PHAGE	Fe-S oxidoreductase .
MH0071.scaffold943_7	6204	6830	-	NA	NA	NA	NA	NA
MH0071.scaffold943_7	7459	7722	-	COG5377	[DNA replication, recombination, and repair]	7e-05	PHAGE	Phage-related protein, predicted endonuclease .
MH0071.scaffold943_7	9021	9713	+	NA	NA	NA	NA	NA
MH0071.scaffold943_7	10252	10557	+	NA	NA	NA	NA	NA
MH0071.scaffold943_7	9772	10221	-	COG3645	[Function unknown]	1e-19	PHAGE	Uncharacterized phage-encoded protein .
MH0071.scaffold943_7	10674	10850	-	NONE	NONE	0.018	NOT_PHAGE	TIGR02390, RNA_pol_rpoA1, This family consists of the archaeal A' subunit of the DNA-directed RNA polymerase. The example from Methanocaldococcus jannaschii contains an intein.
MH0071.scaffold943_7	12252	12554	+	COG1961	[DNA replication, recombination, and repair]	1e-05	NOT_PHAGE	PinR, Site-specific recombinases, DNA invertase Pin homologs .
MH0071.scaffold943_7	13199	14881	+	NONE	NONE	0.002	PHAGE	TIGR01630, psiM2_ORF9, This model represents the C-terminal region of a set of phage proteins typically about 400-500 amino acids in length, although some members are considerably shorter. An article on Methanobacterium phage Psi-M2 (PMID:9791169) calls the member from that phage, ORF9, a putative large terminase subunit, and ORF8 a candidate terminase small subunit. Most proteins in this family …
V1.UC-18.scaffold35335_2	367	1029	+	COG3740	[General function prediction only]	2e-20	PHAGE	Phage head maturation protease .
V1.UC-18.scaffold35335_2	1042	2262	+	NA	NA	NA	NA	NA
V1.UC-18.scaffold35335_2	2307	2927	+	NA	NA	NA	NA	NA
V1.UC-18.scaffold35335_2	3319	3978	+	NONE	NONE	5e-18	NOT_PHAGE	pfam04383, KilA-N, KilA-N domain. The amino-terminal module of the D6R/N1R proteins defines a novel, conserved DNA-binding domain (the KilA-N domain) that is found in a wide range of proteins of large bacterial and eukaryotic DNA viruses. The KilA-N domain family also includes the previously defined APSES domain. The KilA-N and APSES domains may also share a common fold with the nucleic acid-bind…
V1.UC-18.scaffold35335_2	5206	7428	+	NONE	NONE	4e-19	PHAGE	TIGR01760, tape_meas_TP901, This model represents a reasonably well conserved core region of a family of phage tail proteins. The member from phage TP901-1 was characterized as a tail length tape measure protein in that a shortened form of the protein leads to phage with proportionately shorter tails.
V1.UC-18.scaffold35335_2	7430	9508	+	NA	NA	NA	NA	NA
MH0049.scaffold1508_1	385	2460	-	COG0550	[DNA replication, recombination, andrepair]	6e-106	NOT_PHAGE	TopA, Topoisomerase IA .
MH0049.scaffold1508_1	2457	3311	-	NA	NA	NA	NA	NA
MH0049.scaffold1508_1	3469	4191	-	COG0175	[Aminoacid transport and metabolism / Coenzyme metabolism]	0.01	NOT_PHAGE	CysH, 3'-phosphoadenosine 5'-phosphosulfate sulfotransferase (PAPSreductase)/FAD synthetase and related enzymes .
MH0049.scaffold1508_1	4205	6133	-	COG0791	[Cell envelope biogenesis, outer membrane]	4e-19	NOT_PHAGE	Spr, Cell wall-associated hydrolases (invasion-associated proteins).
MH0049.scaffold1508_1	6172	7116	-	COG0863	[DNA replication, recombination,and repair]	3e-24	NOT_PHAGE	DNA modification methylase .
MH0049.scaffold1508_1	7125	9521	-	COG3451	[Intracellular traffickingand secretion]	2e-18	NOT_PHAGE	VirB4, Type IV secretory pathway, VirB4 components .
MH0032.scaffold11044_2	429	5438	+	COG1196	[Cell division and chromosome partitioning]	4e-05	NOT_PHAGE	Smc, Chromosome segregation ATPases .
MH0032.scaffold11044_2	5444	7285	+	NA	NA	NA	NA	NA
MH0032.scaffold11044_2	7475	8062	+	NA	NA	NA	NA	NA
MH0032.scaffold11044_2	9444	10388	+	NA	NA	NA	NA	NA
MH0032.scaffold11044_2	10388	11092	+	NA	NA	NA	NA	NA
MH0032.scaffold11044_2	11150	12916	+	NONE	NONE	0.049	PHAGE	pfam04984, Phage_sheath_1, Phage tail sheath protein. This family includes a variety of phage tail sheath proteins.
MH0032.scaffold11044_2	13516	14277	+	NA	NA	NA	NA	NA
MH0032.scaffold11044_2	14424	16370	+	NONE	NONE	1e-26	PHAGE	TIGR01760, tape_meas_TP901, This model represents a reasonably well conserved core region of a family of phage tail proteins. The member from phage TP901-1 was characterized as a tail length tape measure protein in that a shortened form of the protein leads to phage with proportionately shorter tails.
MH0032.scaffold11044_2	16383	17300	+	NA	NA	NA	NA	NA
MH0032.scaffold11044_2	18064	19977	+	COG3500	[General function prediction only]	0.003	PHAGE	Phage protein D .
MH0032.scaffold11044_2	19982	20704	+	NA	NA	NA	NA	NA
MH0032.scaffold11044_2	21131	22852	+	COG3299	[Function unknown]	0.002	PHAGE	XkdT, Uncharacterized homolog of phage Mu protein gp47 .
MH0032.scaffold11044_2	22852	25314	+	NA	NA	NA	NA	NA
MH0032.scaffold11044_2	25771	27183	+	NONE	NONE	0.011	NOT_PHAGE	PRK06148, PRK06148, hypothetical protein; Provisional.
MH0032.scaffold11044_2	27331	27984	-	NA	NA	NA	NA	NA
MH0032.scaffold11044_2	28159	29595	+	COG0305	[DNA replication, recombination, and repair]	1e-09	NOT_PHAGE	DnaB, Replicative DNA helicase .
MH0032.scaffold11044_2	29757	30710	+	COG0358	[DNA replication, recombination, and repair]	3e-08	NOT_PHAGE	DnaG, DNA primase (bacterial type) .
MH0032.scaffold11044_2	30744	31565	+	NA	NA	NA	NA	NA
MH0032.scaffold11044_2	32159	33646	+	COG1061	[Transcription / DNA replication, recombination, and repair]	1e-28	NOT_PHAGE	SSL2, DNA or RNA helicases of superfamily II .
MH0032.scaffold11044_2	35533	36378	+	NA	NA	NA	NA	NA
MH0032.scaffold11044_2	36405	37325	+	NA	NA	NA	NA	NA
O2.UC-16.scaffold1286_1	201	1391	-	COG4974	[DNA replication, recombination,and repair]	6e-11	NOT_PHAGE	XerD, Site-specific recombinase XerD .
O2.UC-16.scaffold1286_1	5811	6452	+	COG0629	[DNA replication, recombination,and repair]	0.009	NOT_PHAGE	Ssb, Single-stranded DNA-binding protein .
O2.UC-16.scaffold1286_1	6673	7464	+	NA	NA	NA	NA	NA
O2.UC-16.scaffold1286_1	8956	9729	+	COG1192	[Cell divisionand chromosome partitioning]	3e-37	NOT_PHAGE	Soj, ATPases involved in chromosome partitioning .
O2.UC-16.scaffold1286_1	9733	11454	+	NONE	NONE	7e-07	NOT_PHAGE	smart00470, ParB, ParB-like nuclease domain. Plasmid RK2 ParB preferentiallycleaves single-stranded DNA. ParB also nicks supercoiledplasmid DNA preferably at sites with potential single-strandedcharacter, like AT-rich regions and sequences thatcan form cruciform structures. ParB also exhibits 5-->3 exonucleaseactivity.
O2.UC-16.scaffold1286_1	12101	12436	+	NA	NA	NA	NA	NA
O2.UC-16.scaffold1286_1	12766	13110	+	COG4226	[Function unknown]	3e-10	NOT_PHAGE	HicB, Uncharacterized protein encoded in hypervariable junctionsof pilus gene clusters .
O2.UC-16.scaffold1286_1	13912	14325	+	COG3747	[DNA replication, recombination,and repair]	7e-14	PHAGE	Phage terminase, small subunit .
O2.UC-16.scaffold1286_1	14318	15937	+	COG4626	[Generalfunction prediction only]	3e-64	PHAGE	Phage terminase-like protein, large subunit .
O2.UC-16.scaffold1286_1	16132	17370	+	COG4695	[Function unknown]	2e-25	PHAGE	Phage-related protein .
O2.UC-16.scaffold1286_1	17357	18037	+	COG3740	[General function predictiononly]	4e-25	PHAGE	Phage head maturation protease .
O2.UC-16.scaffold1286_1	18041	19150	+	NONE	NONE	3e-21	PHAGE	TIGR01554, major_cap_HK97, This model family represents the major capsidprotein component of the heads (capsids) of bacteriophage HK97,phi-105, P27, and related phage. This model representsone of several analogous families lacking detectable sequencesimilarity. The gene encoding this component is typicallylocated in an operon encoding the small and large terminasesubunits, the portal protein and …
O2.UC-16.scaffold1286_1	19544	19798	+	COG5614	[General function predictiononly]	3e-07	PHAGE	Bacteriophage head-tail adaptor .
O2.UC-16.scaffold1286_1	19975	20250	+	NONE	NONE	0.004	PHAGE	TIGR01725, phge_HK97_gp10, This model represents an uncharacterized, highlydivergent bacteriophage family. The family includes gp10from HK022 and HK97. It appears related to TIGR01635, aphage morphogenesis family believed to be involved in tailcompletion.
O2.UC-16.scaffold1286_1	20673	21338	+	NONE	NONE	3e-19	PHAGE	TIGR01603, maj_tail_phi13, This model describes a set of proteins thatshare low levels of sequence similarity but similar lengthsand similar patterns of charged, hydrophobic, and Gly/Proresidues. All members (except one attributed to mouse embryocDNA) belong to phage of Gram-positive bacteria. Several areidentified as phage major tail proteins. Some members ofthis family have additional C-termina…
O2.UC-16.scaffold1286_1	21390	22010	+	NA	NA	NA	NA	NA
O2.UC-16.scaffold1286_1	22559	26059	+	COG5412	[Function unknown]	5e-12	PHAGE	Phage-related protein .
O2.UC-16.scaffold1286_1	26059	26769	+	COG4722	[Function unknown]	8e-19	PHAGE	Phage-related protein .
V1.UC-9.scaffold26453_1	575	1381	-	NA	NA	NA	NA	NA
V1.UC-9.scaffold26453_1	2498	3895	-	COG1961	[DNA replication, recombination, and repair]	6e-22	NOT_PHAGE	PinR, Site-specific recombinases, DNA invertase Pin homologs .
V1.UC-9.scaffold26453_1	4377	5042	-	COG1040	[General function prediction only]	0.016	NOT_PHAGE	ComFC, Predicted amidophosphoribosyltransferases .
V1.UC-9.scaffold26453_1	5044	5670	-	NONE	NONE	0.0005	PHAGE	pfam11417, Inhibitor_G39P, Loader and inhibitor of phage G40P. G39P inhibits the initiation of DNA replication by blocking G40P replicative helicase. G39P has a bipartite stricture consisting of a folded N-terminal domain and an unfolded C-terminal domain. The C terminal is essential for helicase interaction.
V1.UC-9.scaffold26453_1	5723	6484	-	NONE	NONE	8e-24	PHAGE	pfam09524, Phg_2220_C, Conserved phage C-terminus (Phg_2220_C). This entry represents the conserved C-terminal domain of a family of proteins found exclusively in bacteriophage and in bacterial prophage regions. The functions of this domain and the proteins containing it are unknown.
V1.UC-9.scaffold26453_1	7427	8437	-	COG0270	[DNA replication, recombination, and repair]	7e-29	NOT_PHAGE	Dcm, Site-specific DNA methylase .
V1.UC-9.scaffold26453_1	9049	9861	-	COG0535	[General function prediction only]	0.0004	NOT_PHAGE	Predicted Fe-S oxidoreductases .
V1.UC-9.scaffold26453_1	12925	13653	-	COG1235	[General function prediction only]	9e-08	NOT_PHAGE	PhnP, Metal-dependent hydrolases of the beta-lactamase superfamily I .
V1.UC-9.scaffold26453_1	13915	14652	-	COG0175	[Amino acid transport and metabolism / Coenzyme metabolism]	1e-07	NOT_PHAGE	CysH, 3'-phosphoadenosine 5'-phosphosulfate sulfotransferase (PAPS reductase)/FAD synthetase and related enzymes .
MH0040.scaffold104579_1	894	3953	+	COG0358	[DNA replication, recombination,and repair]	1e-11	NOT_PHAGE	DnaG, DNA primase (bacterial type) .
MH0040.scaffold104579_1	4354	4680	+	NA	NA	NA	NA	NA
MH0040.scaffold104579_1	5371	5700	+	NA	NA	NA	NA	NA
MH0040.scaffold104579_1	5899	6720	+	COG0616	[Posttranslational modification,protein turnover, chaperones / Intracellulartrafficking and secretion]	3e-22	NOT_PHAGE	SppA, Periplasmic serine proteases (ClpP class) .
MH0040.scaffold104579_1	6733	8913	+	NA	NA	NA	NA	NA
MH0040.scaffold104579_1	9305	9775	+	NA	NA	NA	NA	NA
MH0040.scaffold104579_1	10644	11504	+	NA	NA	NA	NA	NA
MH0040.scaffold104579_1	12019	12669	+	NA	NA	NA	NA	NA
MH0040.scaffold104579_1	12677	14332	+	NA	NA	NA	NA	NA
MH0040.scaffold104579_1	15097	15741	+	COG0207	[Nucleotide transport and metabolism]	4e-13	NOT_PHAGE	ThyA, Thymidylate synthase .
MH0040.scaffold104579_1	15828	16697	+	COG0338	[DNA replication, recombination, andrepair]	0.0006	NOT_PHAGE	Dam, Site-specific DNA methylase .
MH0040.scaffold104579_1	19868	21085	+	NA	NA	NA	NA	NA
MH0040.scaffold104579_1	21089	22027	+	NA	NA	NA	NA	NA
MH0040.scaffold104579_1	22063	22794	+	NA	NA	NA	NA	NA
MH0040.scaffold104579_1	22800	23237	+	NA	NA	NA	NA	NA
MH0040.scaffold104579_1	23318	23698	+	NA	NA	NA	NA	NA
MH0040.scaffold104579_1	23798	27976	+	NONE	NONE	0.01	NOT_PHAGE	TIGR02168, SMC_prok_B, SMC (structural maintenance of chromosomes) proteinsbind DNA and act in organizing and segregating chromosomesfor partition. SMC proteins are found in bacteria, archaea,and eukaryotes. This family represents the SMC proteinof most bacteria. The smc gene is often associated withscpB (TIGR00281) and scpA genes, where scp stands for segregation andcondensation protein. SMC was…
MH0040.scaffold104579_1	28401	31313	+	NA	NA	NA	NA	NA
MH0040.scaffold104579_1	31394	32473	+	NA	NA	NA	NA	NA
V1.UC-9.scaffold88471_1	83	940	+	NA	NA	NA	NA	NA
V1.UC-9.scaffold88471_1	4284	5960	+	COG5410	[Function unknown]	2e-06	NOT_PHAGE	Uncharacterized protein conserved in bacteria .
V1.UC-9.scaffold88471_1	6510	8279	+	NONE	NONE	6e-31	PHAGE	pfam05133, Phage_prot_Gp6, Phage portal protein, SPP1 Gp6-like. This protein forms a hole, or portal, that enables DNA passage during packaging and ejection. It also forms the junction between the phage head (capsid) and the tail proteins. During SPP1 morphogenesis, Gp6 participates in the procapsid assembly reaction. This family also includes family Phage_min_cap, pfam05126.
V1.UC-9.scaffold88471_1	8254	8853	+	NA	NA	NA	NA	NA
V1.UC-9.scaffold88471_1	8866	9861	+	NA	NA	NA	NA	NA
V1.UC-9.scaffold88471_1	10441	11055	+	NA	NA	NA	NA	NA
V1.UC-9.scaffold88471_1	12753	15827	+	COG5280	[Function unknown]	0.014	PHAGE	Phage-related minor tail protein .
V1.UC-9.scaffold88471_1	16222	18564	+	NA	NA	NA	NA	NA
V1.UC-18.scaffold3250_1	412	1455	-	NA	NA	NA	NA	NA
V1.UC-18.scaffold3250_1	1474	2646	-	NONE	NONE	0.0003	NOT_PHAGE	pfam08522, DUF1735, Domain of unknown function (DUF1735). This domain of unknown function is found in a number of bacterial proteins including acylhydrolases.
V1.UC-18.scaffold3250_1	2665	3810	-	NONE	NONE	1e-42	NOT_PHAGE	cd06542, GH18_EndoS-like, Endo-beta-N-acetylglucosaminidases are bacterial chitinases that hydrolyze the chitin core of various asparagine (N)-linked glycans and glycoproteins. The endo-beta-N-acetylglucosaminidases have a glycosyl hydrolase family 18 (GH18) catalytic domain. Some members also have an additional C-terminal glycosyl hydrolase family 20 (GH20) domain while others have an N-terminal…
V1.UC-18.scaffold3250_1	3823	5373	-	NA	NA	NA	NA	NA
V1.UC-18.scaffold3250_1	5389	8670	-	COG1629	[Inorganic ion transport and metabolism]	1e-14	NOT_PHAGE	CirA, Outer membrane receptor proteins, mostly Fe transport .
V1.UC-18.scaffold3250_1	8862	9854	-	COG3712	[Inorganic ion transport and metabolism / Signal transduction mechanisms]	2e-25	NOT_PHAGE	FecR, Fe2+-dicitrate sensor, membrane component .
V1.UC-18.scaffold3250_1	11468	12082	+	COG1396	[Transcription]	2e-05	NOT_PHAGE	HipB, Predicted transcriptional regulators .
V1.UC-18.scaffold3250_1	12452	14479	+	COG0358	[DNA replication, recombination, and repair]	0.007	NOT_PHAGE	DnaG, DNA primase (bacterial type) .
V1.UC-18.scaffold3250_1	14523	14726	+	COG0789	[Transcription]	0.023	NOT_PHAGE	SoxR, Predicted transcriptional regulators .
V1.UC-18.scaffold3250_1	14877	16274	-	COG1373	[General function prediction only]	1e-15	NOT_PHAGE	Predicted ATPase (AAA+ superfamily) .
V1.UC-18.scaffold3250_1	20672	21571	-	COG4823	[Defense mechanisms]	2e-36	PHAGE	AbiF, Abortive infection bacteriophage resistance protein .
V1.UC-18.scaffold3250_1	22385	23041	-	COG1192	[Cell division and chromosome partitioning]	1e-37	NOT_PHAGE	Soj, ATPases involved in chromosome partitioning .
V1.UC-18.scaffold3250_1	23496	24770	-	NA	NA	NA	NA	NA
MH0003.scaffold39547_2	18	689	+	NA	NA	NA	NA	NA
MH0003.scaffold39547_2	692	1573	+	NA	NA	NA	NA	NA
MH0003.scaffold39547_2	1645	2280	+	NA	NA	NA	NA	NA
MH0003.scaffold39547_2	3363	7247	+	NONE	NONE	0.006	NOT_PHAGE	PRK08026, PRK08026, flagellin; Validated.
MH0003.scaffold39547_2	7370	9028	+	NA	NA	NA	NA	NA
MH0003.scaffold39547_2	10229	12415	+	NA	NA	NA	NA	NA
MH0003.scaffold39547_2	12421	14589	+	NA	NA	NA	NA	NA
MH0003.scaffold39547_2	14576	15616	+	NA	NA	NA	NA	NA
MH0003.scaffold39547_2	15878	16672	+	NA	NA	NA	NA	NA
MH0003.scaffold39547_2	16663	17583	+	NA	NA	NA	NA	NA
MH0003.scaffold39547_2	17580	18752	+	COG3299	[Function unknown]	4e-09	PHAGE	XkdT, Uncharacterized homolog of phage Mu protein gp47 .
MH0003.scaffold39547_2	19750	22089	+	NA	NA	NA	NA	NA
MH0003.scaffold39547_2	22106	23491	+	NA	NA	NA	NA	NA
MH0003.scaffold39547_2	24056	24796	+	NONE	NONE	2e-17	PHAGE	TIGR01453, grpIintron_endo, This model represents one subfamily of endonucleases containing the endo/excinuclease amino terminal domain, pfam01541 at its amino end. A distinct subfamily includes excinuclease abc subunit c (uvrC). Members of pfam01541 are often termed GIY-YIG endonucleases after conserved motifs near the amino end. This subfamily in this HMM is found in open reading frames of grou…
MH0003.scaffold39547_2	24763	25473	+	NA	NA	NA	NA	NA
MH0003.scaffold39547_2	26294	26998	+	NONE	NONE	7e-13	PHAGE	TIGR01453, grpIintron_endo, This model represents one subfamily of endonucleases containing the endo/excinuclease amino terminal domain, pfam01541 at its amino end. A distinct subfamily includes excinuclease abc subunit c (uvrC). Members of pfam01541 are often termed GIY-YIG endonucleases after conserved motifs near the amino end. This subfamily in this HMM is found in open reading frames of grou…
MH0003.scaffold39547_2	27007	27690	+	COG2176	[DNA replication, recombination, and repair]	3e-13	NOT_PHAGE	PolC, DNA polymerase III, alpha subunit (gram-positive type) .
MH0003.scaffold39547_2	27687	29786	+	COG5362	[General function prediction only]	0.002	PHAGE	Phage-related terminase .
MH0003.scaffold39547_2	29798	31441	+	COG0305	[DNA replication, recombination, and repair]	2e-12	NOT_PHAGE	DnaB, Replicative DNA helicase .
MH0003.scaffold39547_2	31449	32495	+	NA	NA	NA	NA	NA
MH0003.scaffold39547_2	33586	34308	+	COG5271	[General function prediction only]	0.006	NOT_PHAGE	MDN1, AAA ATPase containing von Willebrand factor type A (vWA) domain .
MH0003.scaffold39547_2	34309	35055	+	NONE	NONE	0.022	NOT_PHAGE	cd03254, ABCC_Glucan_exporter_like, Glucan exporter ATP-binding protein. In A. tumefaciens cyclic beta-1, 2-glucan must be transported into the periplasmic space to exert its action as a virluence factor. This subfamily belongs to the MRP-like family and is involved in drug, peptide, and lipid export. The MRP-like family, similar to all ABC proteins, have a common four-domain core structure const…
MH0003.scaffold39547_2	35006	36070	+	NA	NA	NA	NA	NA
MH0003.scaffold39547_2	36085	37203	+	COG0207	[Nucleotide transport and metabolism]	6e-19	NOT_PHAGE	ThyA, Thymidylate synthase .
MH0003.scaffold39547_2	37765	38412	+	NONE	NONE	0.027	NOT_PHAGE	smart00382, AAA, ATPases associated with a variety of cellular activities. AAA - ATPases associated with a variety of cellular activities. This profile/alignment only detects a fraction of this vast family. The poorly conserved N-terminal helix is missing from the alignment.
O2.UC-12.scaffold10767_4	670	1797	-	COG4974	[DNA replication, recombination, and repair]	3e-06	NOT_PHAGE	XerD, Site-specific recombinase XerD .
O2.UC-12.scaffold10767_4	1962	2948	-	COG4823	[Defense mechanisms]	9e-23	PHAGE	AbiF, Abortive infection bacteriophage resistance protein .
O2.UC-12.scaffold10767_4	3136	3810	-	COG1974	[Transcription / Signal transduction mechanisms]	1e-18	NOT_PHAGE	LexA, SOS-response transcriptional repressors (RecA-mediated autopeptidases) .
O2.UC-12.scaffold10767_4	4285	4839	+	NA	NA	NA	NA	NA
O2.UC-12.scaffold10767_4	5648	6088	+	NONE	NONE	0.008	NOT_PHAGE	PRK10819, PRK10819, transport protein TonB; Provisional.
O2.UC-12.scaffold10767_4	6088	7218	+	NONE	NONE	e-117	NOT_PHAGE	pfam10926, DUF2800, Protein of unknown function (DUF2800). This is a family of uncharacterized proteins found in bacteria and viruses. Some members of this family are annotated as being Phi APSE P51-like proteins.
O2.UC-12.scaffold10767_4	7299	7772	+	NONE	NONE	1e-29	PHAGE	pfam10991, DUF2815, Protein of unknown function (DUF2815). This is a phage related family of proteins with unknown function.
O2.UC-12.scaffold10767_4	7785	9746	+	COG0749	[DNA replication, recombination, and repair]	2e-18	NOT_PHAGE	PolA, DNA polymerase I - 3'-5' exonuclease and polymerase domains .
O2.UC-12.scaffold10767_4	9760	10104	+	NA	NA	NA	NA	NA
O2.UC-12.scaffold10767_4	10116	11756	+	NA	NA	NA	NA	NA
MH0075.scaffold61433_1	333	1094	+	COG5484	[Function unknown]	3e-15	NOT_PHAGE	Uncharacterized conserved protein .
MH0075.scaffold61433_1	1075	1578	+	COG4220	[DNA replication, recombination, and repair]	0.027	PHAGE	Phage DNA packaging protein, Nu1 subunit of terminase .
MH0075.scaffold61433_1	1665	3524	+	COG5525	[General function prediction only]	e-104	PHAGE	Bacteriophage tail assembly protein .
MH0075.scaffold61433_1	3768	5390	+	COG5511	[General function prediction only]	5e-53	PHAGE	Bacteriophage capsid protein .
MH0075.scaffold61433_1	5491	6537	+	COG0740	[Posttranslational modification, protein turnover, chaperones / Intracellular trafficking and secretion]	6e-15	NOT_PHAGE	ClpP, Protease subunit of ATP-dependent Clp proteases .
MH0075.scaffold61433_1	6541	6939	+	NA	NA	NA	NA	NA
MH0075.scaffold61433_1	6955	8031	+	NONE	NONE	4e-31	PHAGE	pfam03864, Phage_cap_E, Phage major capsid protein E. Major capsid protein E is involved with the stabilisation of the condensed form of the DNA molecule in phage heads.
MH0075.scaffold61433_1	8624	9247	-	NA	NA	NA	NA	NA
MH0075.scaffold61433_1	9388	9891	+	NA	NA	NA	NA	NA
MH0075.scaffold61433_1	10198	11646	+	COG3497	[General function prediction only]	4e-14	PHAGE	Phage tail sheath protein FI .
MH0075.scaffold61433_1	11668	12195	+	COG3498	[General function prediction only]	8e-20	PHAGE	Phage tail tube protein FII .
MH0075.scaffold61433_1	12272	12937	+	NA	NA	NA	NA	NA
MH0075.scaffold61433_1	13065	16568	+	COG5412	[Function unknown]	7e-06	PHAGE	Phage-related protein .
MH0075.scaffold61433_1	16795	17793	+	COG3500	[General function prediction only]	9e-20	PHAGE	Phage protein D .
MH0075.scaffold61433_1	17798	18415	+	NA	NA	NA	NA	NA
MH0075.scaffold61433_1	18827	19153	+	NONE	NONE	0.023	NOT_PHAGE	PHA00415, PHA00415, baseplate wedge subunit gp25.
MH0075.scaffold61433_1	19146	20327	+	COG3948	[General function prediction only]	8e-22	PHAGE	Phage-related baseplate assembly protein .
MH0075.scaffold61433_1	20320	21087	+	COG4385	[General function prediction only]	4e-15	PHAGE	gpI, Bacteriophage P2-related tail formation protein .
MH0075.scaffold61433_1	21084	22211	+	NONE	NONE	0.005	NOT_PHAGE	pfam00042, Globin, Globin.
MH0075.scaffold61433_1	22231	23100	+	NA	NA	NA	NA	NA
MH0075.scaffold61433_1	23148	23570	+	NA	NA	NA	NA	NA
MH0075.scaffold61433_1	23571	23957	+	NA	NA	NA	NA	NA
MH0072.scaffold7078_1	163	372	+	NONE	NONE	0.003	NOT_PHAGE	smart00530, HTH_XRE, Helix-turn-helix XRE-family like proteins.
MH0072.scaffold7078_1	498	1253	+	COG1961	[DNA replication, recombination, and repair]	4e-19	NOT_PHAGE	PinR, Site-specific recombinases, DNA invertase Pin homologs .
MH0072.scaffold7078_1	1848	3482	+	COG5410	[Function unknown]	2e-09	NOT_PHAGE	Uncharacterized protein conserved in bacteria .
MH0072.scaffold7078_1	3685	5163	+	NONE	NONE	3e-32	PHAGE	pfam05133, Phage_prot_Gp6, Phage portal protein, SPP1 Gp6-like. This protein forms a hole, or portal, that enables DNA passage during packaging and ejection. It also forms the junction between the phage head (capsid) and the tail proteins. During SPP1 morphogenesis, Gp6 participates in the procapsid assembly reaction. This family also includes family Phage_min_cap, pfam05126.
MH0072.scaffold7078_1	5275	5862	+	NONE	NONE	0.01	NOT_PHAGE	PRK00409, PRK00409, recombination and DNA strand exchange inhibitor protein; Reviewed.
MH0072.scaffold7078_1	5934	7031	-	NA	NA	NA	NA	NA
MH0072.scaffold7078_1	7127	7528	+	NA	NA	NA	NA	NA
MH0072.scaffold7078_1	8492	8887	+	NONE	NONE	0.008	PHAGE	pfam08813, Phage_tail_3, Phage tail protein. This family of proteins include phage tail proteins. They probably include bacterial Ig-like domains related to pfam02368. Which also includes a number of phage tail invasin proteins.
MH0072.scaffold7078_1	9698	14383	+	COG1283	[Inorganic ion transport and metabolism]	0.006	NOT_PHAGE	NptA, Na+/phosphate symporter .
MH0072.scaffold7078_1	14783	17005	+	NA	NA	NA	NA	NA
MH0072.scaffold7078_1	17433	18059	+	NA	NA	NA	NA	NA
MH0072.scaffold7078_1	18062	18964	+	NA	NA	NA	NA	NA
MH0072.scaffold7078_1	19986	20915	+	NONE	NONE	8e-08	NOT_PHAGE	cd01646, RT_Bac_retron_I, RT_Bac_retron_I: Reverse transcriptases (RTs) in bacterial retrotransposons or retrons. The polymerase reaction of this enzyme leads to the production of a unique RNA-DNA complex called msDNA (multicopy single-stranded (ss)DNA) in which a small ssDNA branches out from a small ssRNA molecule via a 2'-5'phosphodiester linkage. Bacterial retron RTs produce cDNA correspondin…
MH0072.scaffold7078_1	20879	21208	+	NA	NA	NA	NA	NA
MH0072.scaffold7078_1	21897	23354	+	COG1705	[Cell motility and secretion / Intracellular trafficking and secretion]	3e-15	NOT_PHAGE	FlgJ, Muramidase (flagellum-specific) .
O2.UC-20.scaffold15641_5	306	683	-	NA	NA	NA	NA	NA
O2.UC-20.scaffold15641_5	1109	2107	-	NA	NA	NA	NA	NA
O2.UC-20.scaffold15641_5	2111	2716	-	NA	NA	NA	NA	NA
O2.UC-20.scaffold15641_5	2672	3043	+	NA	NA	NA	NA	NA
O2.UC-20.scaffold15641_5	3282	4283	-	COG2369	[Function unknown]	0.0003	PHAGE	Uncharacterized protein, homolog of phage Mu proteingp30 .
O2.UC-20.scaffold15641_5	4297	5676	-	NONE	NONE	6e-29	PHAGE	pfam05133, Phage_prot_Gp6, Phage portal protein, SPP1 Gp6-like. This protein forms a hole, or portal, that enables DNA passage duringpackaging and ejection. It also forms the junction betweenthe phage head (capsid) and the tail proteins. DuringSPP1 morphogenesis, Gp6 participates in the procapsid assemblyreaction. This family also includes family Phage_min_cap, pfam05126.
O2.UC-20.scaffold15641_5	5711	6985	-	COG1783	[General function predictiononly]	9e-53	PHAGE	XtmB, Phage terminase large subunit .
O2.UC-20.scaffold15641_5	7403	8629	-	COG0863	[DNA replication, recombination,and repair]	1e-28	NOT_PHAGE	DNA modification methylase .
V1.UC-15.scaffold3192_8	1439	1942	+	NA	NA	NA	NA	NA
V1.UC-15.scaffold3192_8	20	1462	-	COG0209	[Nucleotide transport and metabolism]	9e-63	NOT_PHAGE	NrdA, Ribonucleotide reductase, alpha subunit .
V1.UC-15.scaffold3192_8	2366	4831	-	COG0188	[DNA replication, recombination, and repair]	0	NOT_PHAGE	GyrA, Type IIA topoisomerase (DNA gyrase/topo II, topoisomerase IV), A subunit .
V1.UC-15.scaffold3192_8	6012	6311	-	NONE	NONE	2e-07	PHAGE	cd06414, GH25_LytC-like, The LytC lysozyme of Streptococcus pneumoniae is a bacterial cell wall hydrolase that cleaves the beta1-4-glycosydic bond located between the N-acetylmuramoyl-N-glucosaminyl residues of the cell wall polysaccharide chains. LytC is composed of a C-terminal glycosyl hydrolase family 25 (GH25) domain and an N-terminal choline-binding module (CBM) consisting of eleven homolog…
V1.UC-15.scaffold3192_8	7561	9564	-	NA	NA	NA	NA	NA
V1.UC-15.scaffold3192_8	9792	10361	-	NA	NA	NA	NA	NA
MH0063.scaffold5042_4	1879	5928	-	COG4926	[Function unknown]	2e-08	PHAGE	PblB, Phage-related protein .
MH0063.scaffold5042_4	5913	7118	-	NONE	NONE	0.007	PHAGE	pfam05709, Sipho_tail, Phage tail protein. This family consists of several Siphovirus and other phage tail component proteins as well as some bacterial proteins of unknown function.
MH0063.scaffold5042_4	7658	12106	-	COG1196	[Cell division and chromosome partitioning]	5e-05	NOT_PHAGE	Smc, Chromosome segregation ATPases .
MH0063.scaffold5042_4	12332	12895	-	NA	NA	NA	NA	NA
MH0063.scaffold5042_4	12982	13410	-	NA	NA	NA	NA	NA
MH0063.scaffold5042_4	15062	16168	-	NA	NA	NA	NA	NA
MH0063.scaffold5042_4	16188	16703	-	NA	NA	NA	NA	NA
MH0063.scaffold5042_4	16773	17462	-	NA	NA	NA	NA	NA
MH0063.scaffold5042_4	18098	18421	+	NA	NA	NA	NA	NA
MH0063.scaffold5042_4	19438	19965	+	NA	NA	NA	NA	NA
MH0063.scaffold5042_4	21328	23760	-	NA	NA	NA	NA	NA
MH0063.scaffold5042_4	24114	25601	-	NONE	NONE	1e-13	PHAGE	pfam05133, Phage_prot_Gp6, Phage portal protein, SPP1 Gp6-like. This protein forms a hole, or portal, that enables DNA passage during packaging and ejection. It also forms the junction between the phage head (capsid) and the tail proteins. During SPP1 morphogenesis, Gp6 participates in the procapsid assembly reaction. This family also includes family Phage_min_cap, pfam05126.
MH0063.scaffold5042_4	25598	27076	-	COG5410	[Function unknown]	7e-25	NOT_PHAGE	Uncharacterized protein conserved in bacteria .
MH0063.scaffold5042_4	27617	28216	-	NA	NA	NA	NA	NA
MH0063.scaffold5042_4	28862	29350	-	NA	NA	NA	NA	NA
MH0063.scaffold5042_4	30607	31050	+	NA	NA	NA	NA	NA
MH0063.scaffold5042_4	31043	31702	+	NA	NA	NA	NA	NA
MH0063.scaffold5042_4	32873	33436	+	NA	NA	NA	NA	NA
MH0063.scaffold5042_4	32687	32908	-	COG0863	[DNA replication, recombination, and repair]	8e-12	NOT_PHAGE	DNA modification methylase .
MH0063.scaffold5042_4	34040	34819	-	COG3645	[Function unknown]	2e-19	PHAGE	Uncharacterized phage-encoded protein .
MH0063.scaffold5042_4	34851	35603	-	COG1484	[DNA replication, recombination, and repair]	0.0005	NOT_PHAGE	DnaC, DNA replication protein .
MH0063.scaffold5042_4	35597	36484	-	NA	NA	NA	NA	NA
MH0063.scaffold5042_4	36522	37256	-	NA	NA	NA	NA	NA
MH0069.scaffold813_1	412	1194	+	NA	NA	NA	NA	NA
MH0069.scaffold813_1	1300	1959	-	NONE	NONE	2e-10	NOT_PHAGE	pfam05257, CHAP, CHAP domain. This domain corresponds to an amidasefunction. Many of these proteins are involved in cell wallmetabolism of bacteria. This domain is found at the N-terminus ofthe bifunctional Escherichia coli GSP synthetase/GSP amidase,where is functions as a glutathionylspermidine amidaseEC:3.5.1.78. This domain is found to be the catalytic domainof PlyCA.
MH0069.scaffold813_1	2336	2458	-	NONE	NONE	1e-06	PHAGE	pfam09693, Phage_XkdX, Phage uncharacterized protein (Phage_XkdX). This entry identifies a family of small (about 50 amino acid)phage proteins, found in at least 12 different phage andprophage regions of Gram-positive bacteria. In a number ofthese phage, the gene for this protein is found near the holinand endolysin genes.
MH0069.scaffold813_1	2627	4384	-	NONE	NONE	0.046	NOT_PHAGE	PRK04439, PRK04439, S-adenosylmethionine synthetase; Provisional.
MH0069.scaffold813_1	4399	4758	-	NA	NA	NA	NA	NA
MH0069.scaffold813_1	4776	5858	-	NA	NA	NA	NA	NA
MH0069.scaffold813_1	6245	10057	-	NONE	NONE	0.008	NOT_PHAGE	TIGR03017, EpsF, Sequences in this family of proteins are members ofthe chain length determinant family (pfam02706) which includesthe wzc protein from E.coli. This family of proteins arehomologous to the EpsF protein of the methanolan biosynthesis operonof Methylobacillus species strain 12S. The distributionof this protein appears to be restricted to a subset ofexopolysaccharide operons containin…
MH0069.scaffold813_1	10020	10499	+	NA	NA	NA	NA	NA
MH0069.scaffold813_1	10518	10829	-	NA	NA	NA	NA	NA
MH0069.scaffold813_1	11259	11582	-	NA	NA	NA	NA	NA
MH0069.scaffold813_1	13266	14633	-	NONE	NONE	4e-06	PHAGE	pfam03864, Phage_cap_E, Phage major capsid protein E. Major capsidprotein E is involved with the stabilisation of the condensed formof the DNA molecule in phage heads.
MH0069.scaffold813_1	14653	14970	-	NA	NA	NA	NA	NA
MH0069.scaffold813_1	14991	15569	-	NA	NA	NA	NA	NA
MH0069.scaffold813_1	15643	16317	-	COG2369	[Function unknown]	0.004	PHAGE	Uncharacterized protein, homolog of phage Mu proteingp30 .
MH0044.scaffold50832_2	40	366	+	NA	NA	NA	NA	NA
MH0044.scaffold50832_2	359	868	+	NA	NA	NA	NA	NA
MH0044.scaffold50832_2	986	1528	+	NONE	NONE	2e-05	PHAGE	TIGR01603, maj_tail_phi13, This model describes a set of proteins that share low levels of sequence similarity but similar lengths and similar patterns of charged, hydrophobic, and Gly/Pro residues. All members (except one attributed to mouse embryo cDNA) belong to phage of Gram-positive bacteria. Several are identified as phage major tail proteins. Some members of this family have additional C-t…
MH0044.scaffold50832_2	1525	1962	+	NA	NA	NA	NA	NA
MH0044.scaffold50832_2	2153	5083	+	COG3941	[General function prediction only]	2e-06	PHAGE	Mu-like prophage protein .
MH0044.scaffold50832_2	5061	5774	+	COG4722	[Function unknown]	2e-21	PHAGE	Phage-related protein .
MH0044.scaffold50832_2	5771	7408	+	COG4926	[Function unknown]	2e-38	PHAGE	PblB, Phage-related protein .
MH0044.scaffold50832_2	7637	8536	+	NONE	NONE	0.001	NOT_PHAGE	PRK12472, PRK12472, hypothetical protein; Provisional.
MH0044.scaffold50832_2	8563	9804	+	NA	NA	NA	NA	NA
MH0044.scaffold50832_2	9999	10115	+	NONE	NONE	0.008	PHAGE	pfam09693, Phage_XkdX, Phage uncharacterized protein (Phage_XkdX). This entry identifies a family of small (about 50 amino acid) phage proteins, found in at least 12 different phage and prophage regions of Gram-positive bacteria. In a number of these phage, the gene for this protein is found near the holin and endolysin genes.
MH0044.scaffold50832_2	10138	10803	+	COG3757	[Cell envelope biogenesis, outer membrane]	4e-17	NOT_PHAGE	Acm, Lyzozyme M1 (1,4-beta-N-acetylmuramidase) .
MH0044.scaffold50832_2	10800	11069	+	NONE	NONE	0.04	NOT_PHAGE	pfam09849, DUF2076, Uncharacterized protein conserved in bacteria (DUF2076). This domain, found in various hypothetical prokaryotic proteins, has no known function. The domain, however, is found in various periplasmic ligand-binding sensor proteins.
MH0044.scaffold50832_2	11073	11414	+	NA	NA	NA	NA	NA
MH0044.scaffold50832_2	12153	12749	-	COG1396	[Transcription]	2e-08	NOT_PHAGE	HipB, Predicted transcriptional regulators .
MH0044.scaffold50832_2	12766	13113	-	NA	NA	NA	NA	NA
MH0044.scaffold50832_2	13338	13856	+	NA	NA	NA	NA	NA
MH0044.scaffold50832_2	14234	15106	+	NA	NA	NA	NA	NA
MH0044.scaffold50832_2	15192	15563	+	NA	NA	NA	NA	NA
MH0044.scaffold50832_2	15576	16217	+	NA	NA	NA	NA	NA
MH0012.scaffold55294_1	754	1218	-	COG5437	[Function unknown]	0.009	NOT_PHAGE	Predicted secreted protein .
MH0012.scaffold55294_1	1238	1627	-	NA	NA	NA	NA	NA
MH0012.scaffold55294_1	1639	2193	-	NA	NA	NA	NA	NA
MH0012.scaffold55294_1	2202	2522	-	COG5614	[General function prediction only]	0.002	PHAGE	Bacteriophage head-tail adaptor .
MH0012.scaffold55294_1	2519	2785	-	NONE	NONE	3e-13	PHAGE	cd08054, gp6, Head-Tail Connector Protein gp6 of Bacteriophage HK97 and similar proteins. The bacteriophage HK97 gp6 protein is critical in the assembly of the connector, a specialized structure that serves as an interface for head and tail attachment, as well as a point at which DNA exits the head during infection by the bacteriophage. It forms a dodecameric ring structure that comprises the mid…
MH0012.scaffold55294_1	2858	4000	-	NONE	NONE	6e-16	PHAGE	pfam05065, Phage_capsid, Phage capsid family. Family of bacteriophage hypothetical proteins and capsid proteins.
MH0012.scaffold55294_1	4020	4532	-	COG3740	[General function prediction only]	1e-15	PHAGE	Phage head maturation protease .
MH0012.scaffold55294_1	4727	5947	-	COG4695	[Function unknown]	7e-44	PHAGE	Phage-related protein .
MH0012.scaffold55294_1	7164	7514	-	NA	NA	NA	NA	NA
MH0012.scaffold55294_1	7965	8558	-	COG4973	[DNA replication, recombination, and repair]	2e-12	NOT_PHAGE	XerC, Site-specific recombinase XerC .
MH0012.scaffold55294_1	8900	9400	-	COG0286	[Defense mechanisms]	6e-05	NOT_PHAGE	HsdM, Type I restriction-modification system methyltransferase subunit .
MH0012.scaffold55294_1	9514	10716	-	COG4626	[General function prediction only]	3e-49	PHAGE	Phage terminase-like protein, large subunit .
V1.CD-11.scaffold7912_3	20	1099	+	NONE	NONE	5e-110	NOT_PHAGE	pfam10926, DUF2800, Protein of unknown function (DUF2800). This isa family of uncharacterized proteins found in bacteria andviruses. Some members of this family are annotated as beingPhi APSE P51-like proteins.
V1.CD-11.scaffold7912_3	1102	1821	+	NONE	NONE	5e-30	PHAGE	pfam10991, DUF2815, Protein of unknown function (DUF2815). This isa phage related family of proteins with unknown function.
V1.CD-11.scaffold7912_3	1834	3801	+	COG0749	[DNA replication, recombination, and repair]	2e-10	NOT_PHAGE	PolA, DNA polymerase I - 3'-5' exonuclease and polymerase domains.
V1.CD-11.scaffold7912_3	3814	6288	+	COG5545	[Generalfunction prediction only]	5e-57	NOT_PHAGE	Predicted P-loop ATPase and inactivated derivatives .
V1.CD-11.scaffold7912_3	6856	8010	+	COG0270	[DNA replication, recombination, andrepair]	2e-52	NOT_PHAGE	Dcm, Site-specific DNA methylase .
V1.CD-11.scaffold7912_3	7964	9394	+	COG0553	[Transcription/ DNA replication, recombination, and repair]	9e-24	NOT_PHAGE	HepA, Superfamily II DNA/RNA helicases, SNF2 family .
V1.CD-11.scaffold7912_3	11039	11575	+	NA	NA	NA	NA	NA
V1.CD-11.scaffold7912_3	11721	13364	+	COG5525	[General functionprediction only]	3e-55	PHAGE	Bacteriophage tail assembly protein .
V1.CD-11.scaffold7912_3	14297	15064	+	COG5511	[General function predictiononly]	8e-46	PHAGE	Bacteriophage capsid protein .
MH0016.scaffold5377_2	1023	2687	-	COG4626	[General function prediction only]	4e-80	PHAGE	Phage terminase-like protein, large subunit .
MH0016.scaffold5377_2	2680	3165	-	NA	NA	NA	NA	NA
MH0016.scaffold5377_2	3689	4042	-	NA	NA	NA	NA	NA
MH0016.scaffold5377_2	4055	4564	-	NA	NA	NA	NA	NA
MH0016.scaffold5377_2	4667	5062	-	NONE	NONE	7e-11	NOT_PHAGE	pfam08774, VRR_NUC, VRR-NUC domain.
MH0016.scaffold5377_2	5181	6167	-	NA	NA	NA	NA	NA
MH0016.scaffold5377_2	7020	7403	-	NA	NA	NA	NA	NA
MH0016.scaffold5377_2	7648	8349	-	COG0270	[DNA replication, recombination, and repair]	1e-09	NOT_PHAGE	Dcm, Site-specific DNA methylase .
MH0016.scaffold5377_2	8948	9832	-	COG0270	[DNA replication, recombination, and repair]	1e-22	NOT_PHAGE	Dcm, Site-specific DNA methylase .
MH0016.scaffold5377_2	10332	10739	-	NA	NA	NA	NA	NA
MH0016.scaffold5377_2	10739	11080	-	NA	NA	NA	NA	NA
MH0016.scaffold5377_2	11263	11679	-	NA	NA	NA	NA	NA
MH0016.scaffold5377_2	14042	15787	+	COG1961	[DNA replication, recombination, and repair]	3e-22	NOT_PHAGE	PinR, Site-specific recombinases, DNA invertase Pin homologs .
MH0016.scaffold5377_2	17018	17209	+	COG3655	[Transcription]	2e-09	NOT_PHAGE	Predicted transcriptional regulator .
MH0016.scaffold5377_2	17640	18707	-	COG3757	[Cell envelope biogenesis, outer membrane]	2e-23	NOT_PHAGE	Acm, Lyzozyme M1 (1,4-beta-N-acetylmuramidase) .
MH0016.scaffold5377_2	18709	18912	-	NONE	NONE	1e-09	PHAGE	pfam04688, Phage_holin, Phage lysis protein, holin. This family constitutes holin proteins from the dsDNA Siphidoviridae group bacteriophages. Most bacteriophages require an endolysin and a holin for host lysis. During late gene expression, holins accumulate and oligomerize in the host cell membrane. They then suddenly trigger to permeabilize the membrane, which causes lysis by allowing endolysin…
MH0016.scaffold5377_2	19299	19448	-	NONE	NONE	0.028	PHAGE	pfam09693, Phage_XkdX, Phage uncharacterized protein (Phage_XkdX). This entry identifies a family of small (about 50 amino acid) phage proteins, found in at least 12 different phage and prophage regions of Gram-positive bacteria. In a number of these phage, the gene for this protein is found near the holin and endolysin genes.
MH0016.scaffold5377_2	19522	20862	-	COG3344	[DNA replication, recombination, and repair]	0.007	NOT_PHAGE	Retron-type reverse transcriptase .
MH0016.scaffold5377_2	21220	22506	-	NA	NA	NA	NA	NA
MH0016.scaffold5377_2	22510	23046	-	NONE	NONE	0.007	PHAGE	PHA00430, PHA00430, tail fiber protein.
MH0016.scaffold5377_2	23805	26780	-	COG4926	[Function unknown]	1e-85	PHAGE	PblB, Phage-related protein .
MH0016.scaffold5377_2	26768	27529	-	COG4722	[Function unknown]	2e-22	PHAGE	Phage-related protein .
MH0016.scaffold5377_2	27522	30494	-	COG5280	[Function unknown]	1e-46	PHAGE	Phage-related minor tail protein .
MH0016.scaffold5377_2	31172	31777	-	NA	NA	NA	NA	NA
MH0016.scaffold5377_2	31780	32127	-	NA	NA	NA	NA	NA
MH0016.scaffold5377_2	32129	32530	-	NA	NA	NA	NA	NA
MH0072.scaffold22653_5	254	628	-	NONE	NONE	7e-26	PHAGE	pfam08890, XkdN, Phage XkdN-like protein. This family of proteins are functionally uncharacterized. They are found in prophage sequence in various bacteria.
MH0072.scaffold22653_5	680	1153	-	NONE	NONE	2e-09	PHAGE	pfam09393, DUF2001, Protein of unknown function (DUF2001). This family includes phage-like element PBSX protein whose structure adopts a beta barrel flanked with alpha helical regions.
MH0072.scaffold22653_5	1178	2521	-	NONE	NONE	1e-74	PHAGE	pfam04984, Phage_sheath_1, Phage tail sheath protein. This family includes a variety of phage tail sheath proteins.
MH0072.scaffold22653_5	2680	3129	-	NA	NA	NA	NA	NA
MH0072.scaffold22653_5	3126	3632	-	NA	NA	NA	NA	NA
MH0072.scaffold22653_5	3629	4012	-	NA	NA	NA	NA	NA
MH0072.scaffold22653_5	4022	4510	-	NA	NA	NA	NA	NA
MH0072.scaffold22653_5	4814	5857	-	COG4834	[Function unknown]	8e-26	NOT_PHAGE	Uncharacterized protein conserved in bacteria .
MH0072.scaffold22653_5	5874	6398	-	NA	NA	NA	NA	NA
MH0072.scaffold22653_5	6402	7565	-	COG3566	[Function unknown]	8e-28	NOT_PHAGE	Uncharacterized protein conserved in bacteria .
MH0072.scaffold22653_5	7598	8752	-	NONE	NONE	1e-20	PHAGE	pfam06152, Phage_min_cap2, Phage minor capsid protein 2. Family of related phage minor capsid proteins.
MH0072.scaffold22653_5	8756	10180	-	COG3567	[Function unknown]	1e-53	NOT_PHAGE	Uncharacterized protein conserved in bacteria .
MH0072.scaffold22653_5	10167	11225	-	COG1783	[General function prediction only]	3e-05	PHAGE	XtmB, Phage terminase large subunit .
MH0072.scaffold22653_5	11892	12515	-	COG0863	[DNA replication, recombination, and repair]	4e-21	NOT_PHAGE	DNA modification methylase .
MH0020.scaffold18411_2	946	2388	-	NA	NA	NA	NA	NA
MH0020.scaffold18411_2	2639	3355	+	COG3119	[Inorganic iontransport and metabolism]	2e-15	NOT_PHAGE	AslA, Arylsulfatase A and related enzymes .
MH0020.scaffold18411_2	3348	4601	+	COG3119	[Inorganic iontransport and metabolism]	7e-12	NOT_PHAGE	AslA, Arylsulfatase A and related enzymes .
MH0020.scaffold18411_2	4615	7968	+	NA	NA	NA	NA	NA
MH0020.scaffold18411_2	8401	9018	-	NA	NA	NA	NA	NA
MH0020.scaffold18411_2	9008	9604	-	COG0860	[Cell envelope biogenesis,outer membrane]	5e-21	NOT_PHAGE	AmiC, N-acetylmuramoyl-L-alanine amidase .
MH0020.scaffold18411_2	9601	10200	-	NA	NA	NA	NA	NA
MH0020.scaffold18411_2	10574	10951	-	NA	NA	NA	NA	NA
MH0020.scaffold18411_2	10965	12152	-	COG3344	[DNA replication, recombination,and repair]	0.005	NOT_PHAGE	Retron-type reverse transcriptase .
MH0020.scaffold18411_2	12485	13846	-	NA	NA	NA	NA	NA
MH0020.scaffold18411_2	14715	20120	-	NA	NA	NA	NA	NA
MH0020.scaffold18411_2	20102	21286	-	NA	NA	NA	NA	NA
MH0020.scaffold18411_2	21288	21596	-	NA	NA	NA	NA	NA
MH0020.scaffold18411_2	21800	27211	-	COG3941	[General function predictiononly]	8e-10	PHAGE	Mu-like prophage protein .
MH0020.scaffold18411_2	27444	28100	-	NA	NA	NA	NA	NA
MH0020.scaffold18411_2	30590	31825	-	NA	NA	NA	NA	NA
MH0020.scaffold18411_2	31845	32492	-	NA	NA	NA	NA	NA
MH0020.scaffold18411_2	32501	33019	-	NA	NA	NA	NA	NA
MH0020.scaffold18411_2	35494	36558	+	COG0270	[DNA replication, recombination, andrepair]	2e-32	NOT_PHAGE	Dcm, Site-specific DNA methylase .
MH0020.scaffold18411_2	37973	38800	+	COG1397	[Posttranslational modification, proteinturnover, chaperones]	9e-36	NOT_PHAGE	DraG, ADP-ribosylglycohydrolase .
MH0020.scaffold18411_2	39187	41796	-	NONE	NONE	3e-10	NOT_PHAGE	cd00233, VIP2, VIP2; A family of actin-ADP-ribosylating toxin. Amember of the Bacillus-prodiced vegetative insecticidal proteins(VIPs) possesses high specificity against the major insectpest, corn rootworms, and belongs to a classs of binary toxinsand regulators of biological pathways distinct from classicalA-B toxins. A novel family of insecticidal ADP-ribosyltransferses wereisolated from Bacill…
MH0020.scaffold18411_2	42260	43684	-	NONE	NONE	1e-21	PHAGE	pfam05133, Phage_prot_Gp6, Phage portal protein, SPP1 Gp6-like. This protein forms a hole, or portal, that enables DNA passage duringpackaging and ejection. It also forms the junction betweenthe phage head (capsid) and the tail proteins. DuringSPP1 morphogenesis, Gp6 participates in the procapsid assemblyreaction. This family also includes family Phage_min_cap, pfam05126.
MH0020.scaffold18411_2	43700	45130	-	COG1783	[General function predictiononly]	0.009	PHAGE	XtmB, Phage terminase large subunit .
MH0020.scaffold18411_2	45964	46569	-	NA	NA	NA	NA	NA
MH0020.scaffold18411_2	46576	47691	-	COG1475	[Transcription]	2e-05	NOT_PHAGE	Spo0J, Predicted transcriptional regulators .
MH0020.scaffold18411_2	49315	50325	-	COG0820	[General functionprediction only]	3e-31	NOT_PHAGE	Predicted Fe-S-cluster redox enzyme .
MH0020.scaffold18411_2	50678	51493	-	COG1475	[Transcription]	8e-07	NOT_PHAGE	Spo0J, Predicted transcriptional regulators .
MH0020.scaffold18411_2	52384	53007	-	COG1484	[DNA replication, recombination, andrepair]	5e-12	NOT_PHAGE	DnaC, DNA replication protein .
MH0020.scaffold18411_2	52964	53779	-	NA	NA	NA	NA	NA
MH0020.scaffold18411_2	53828	54586	-	NA	NA	NA	NA	NA
MH0020.scaffold18411_2	55090	55719	-	NA	NA	NA	NA	NA
MH0020.scaffold18411_2	56287	57015	-	COG0595	[General function prediction only]	4e-08	NOT_PHAGE	Predicted hydrolase of the metallo-beta-lactamase superfamily.
MH0020.scaffold18411_2	57022	57960	-	COG3723	[DNAreplication, recombination, and repair]	8e-50	NOT_PHAGE	RecT, Recombinational DNA repair protein (RecE pathway) .
MH0020.scaffold18411_2	57969	59930	-	COG1196	[Cell division and chromosomepartitioning]	4e-09	NOT_PHAGE	Smc, Chromosome segregation ATPases .
MH0083.scaffold37736_2	1696	3195	-	NONE	NONE	8e-38	PHAGE	pfam05133, Phage_prot_Gp6, Phage portal protein, SPP1 Gp6-like. This protein forms a hole, or portal, that enables DNA passage during packaging and ejection. It also forms the junction between the phage head (capsid) and the tail proteins. During SPP1 morphogenesis, Gp6 participates in the procapsid assembly reaction. This family also includes family Phage_min_cap, pfam05126.
MH0083.scaffold37736_2	3214	4473	-	COG1783	[General function prediction only]	4e-43	PHAGE	XtmB, Phage terminase large subunit .
MH0083.scaffold37736_2	4470	4673	-	NONE	NONE	9e-06	PHAGE	pfam03592, Terminase_2, Terminase small subunit. Packaging of double-stranded viral DNA concatemers requires interaction of the prohead with virus DNA. This process is mediated by a phage-encoded DNA recognition and terminase protein. The terminase enzymes described so far, which are hetero-oligomers composed of a small and a large subunit, do not have a significant level of sequence homology. Th…
MH0083.scaffold37736_2	8382	9626	-	NA	NA	NA	NA	NA
MH0083.scaffold37736_2	9636	11234	-	COG0270	[DNA replication, recombination, and repair]	1e-29	NOT_PHAGE	Dcm, Site-specific DNA methylase .
MH0083.scaffold37736_2	11231	13753	-	COG0553	[Transcription / DNA replication, recombination, and repair]	2e-05	NOT_PHAGE	HepA, Superfamily II DNA/RNA helicases, SNF2 family .
MH0083.scaffold37736_2	14290	15237	-	NA	NA	NA	NA	NA
MH0083.scaffold37736_2	15531	15707	-	NONE	NONE	8e-05	PHAGE	pfam06356, DUF1064, Protein of unknown function (DUF1064). This family consists of several phage and bacterial proteins of unknown function.
MH0071.scaffold16344_4	107	823	+	NA	NA	NA	NA	NA
MH0071.scaffold16344_4	10562	12076	+	NA	NA	NA	NA	NA
MH0071.scaffold16344_4	15069	15695	+	NA	NA	NA	NA	NA
MH0071.scaffold16344_4	17592	17912	-	NA	NA	NA	NA	NA
MH0071.scaffold16344_4	17866	18291	+	NA	NA	NA	NA	NA
MH0071.scaffold16344_4	18343	20343	+	COG0417	[DNA replication,recombination, and repair]	4e-05	NOT_PHAGE	PolB, DNA polymerase elongation subunit (family B) .
MH0071.scaffold16344_4	20951	21739	+	COG0305	[DNA replication, recombination, andrepair]	1e-09	NOT_PHAGE	DnaB, Replicative DNA helicase .
MH0071.scaffold16344_4	23127	23867	+	NA	NA	NA	NA	NA
MH0071.scaffold16344_4	23884	24513	+	NA	NA	NA	NA	NA
MH0071.scaffold16344_4	24737	25705	+	COG0358	[DNA replication, recombination,and repair]	0.001	NOT_PHAGE	DnaG, DNA primase (bacterial type) .
MH0071.scaffold16344_4	26395	27057	+	COG2129	[General function prediction only]	5e-05	NOT_PHAGE	Predicted phosphoesterases, related to the Iccprotein .
MH0071.scaffold16344_4	27047	28027	+	NA	NA	NA	NA	NA
MH0071.scaffold16344_4	37522	38301	-	NA	NA	NA	NA	NA
MH0071.scaffold16344_4	38824	39498	-	NA	NA	NA	NA	NA
MH0071.scaffold16344_4	39514	40152	-	NA	NA	NA	NA	NA
MH0071.scaffold16344_4	47395	48330	-	NA	NA	NA	NA	NA
MH0071.scaffold16344_4	50858	51568	-	NA	NA	NA	NA	NA
MH0071.scaffold16344_4	51614	52060	-	NA	NA	NA	NA	NA
MH0071.scaffold16344_4	52811	53428	-	NA	NA	NA	NA	NA
MH0071.scaffold16344_4	59130	59924	-	NA	NA	NA	NA	NA
MH0071.scaffold16344_4	59937	60476	-	NA	NA	NA	NA	NA
MH0071.scaffold16344_4	65337	66053	-	NA	NA	NA	NA	NA
MH0071.scaffold16344_4	71934	72815	-	NA	NA	NA	NA	NA
MH0071.scaffold16344_4	72891	73517	-	NONE	NONE	0.01	NOT_PHAGE	PRK13055, PRK13055, putative lipid kinase; Reviewed.
MH0071.scaffold16344_4	73548	74279	-	NA	NA	NA	NA	NA
MH0071.scaffold16344_4	75090	76064	-	NA	NA	NA	NA	NA
MH0071.scaffold16344_4	78368	79720	-	NA	NA	NA	NA	NA
MH0071.scaffold16344_4	80389	81039	-	NA	NA	NA	NA	NA
MH0071.scaffold11541_1	4289	5410	-	NA	NA	NA	NA	NA
MH0071.scaffold11541_1	6021	6740	-	NA	NA	NA	NA	NA
MH0071.scaffold11541_1	7648	9135	-	NONE	NONE	4e-18	PHAGE	pfam05133, Phage_prot_Gp6, Phage portal protein, SPP1 Gp6-like. This protein forms a hole, or portal, that enables DNA passage during packaging and ejection. It also forms the junction between the phage head (capsid) and the tail proteins. During SPP1 morphogenesis, Gp6 participates in the procapsid assembly reaction. This family also includes family Phage_min_cap, pfam05126.
MH0071.scaffold11541_1	9720	10385	+	NA	NA	NA	NA	NA
MH0071.scaffold11541_1	9147	9752	-	COG1783	[General function prediction only]	3e-12	PHAGE	XtmB, Phage terminase large subunit .
MH0071.scaffold11541_1	12080	12757	-	COG0175	[Amino acid transport and metabolism / Coenzyme metabolism]	2e-10	NOT_PHAGE	CysH, 3'-phosphoadenosine 5'-phosphosulfate sulfotransferase (PAPS reductase)/FAD synthetase and related enzymes .
MH0071.scaffold11541_1	14755	15558	-	COG1484	[DNA replication, recombination, and repair]	5e-31	NOT_PHAGE	DnaC, DNA replication protein .
MH0071.scaffold11541_1	15524	17080	-	COG4584	[DNA replication, recombination, and repair]	6e-20	NOT_PHAGE	Transposase and inactivated derivatives .
MH0071.scaffold11541_1	18264	18968	+	COG0120	[Carbohydrate transport and metabolism]	3e-52	NOT_PHAGE	RpiA, Ribose 5-phosphate isomerase .
MH0071.scaffold11541_1	18943	20394	-	COG2978	[Coenzyme metabolism]	e-104	NOT_PHAGE	AbgT, Putative p-aminobenzoyl-glutamate transporter .
MH0071.scaffold11541_1	20387	21115	-	COG2197	[Signal transduction mechanisms / Transcription]	4e-13	NOT_PHAGE	CitB, Response regulator containing a CheY-like receiver domain and an HTH DNA-binding domain .
MH0071.scaffold11541_1	21119	25465	-	COG2205	[Signal transduction mechanisms]	7e-15	NOT_PHAGE	KdpD, Osmosensitive K+ channel histidine kinase .
MH0071.scaffold11541_1	25590	26528	+	COG0462	[Nucleotide transport and metabolism / Amino acid transport and metabolism]	7e-99	NOT_PHAGE	PrsA, Phosphoribosylpyrophosphate synthetase .
MH0071.scaffold11541_1	26621	27907	-	COG4642	[Function unknown]	7e-17	NOT_PHAGE	Uncharacterized protein conserved in bacteria .
MH0071.scaffold11541_1	27859	29148	-	COG0612	[General function prediction only]	3e-44	NOT_PHAGE	PqqL, Predicted Zn-dependent peptidases .
MH0071.scaffold11541_1	29161	29976	-	COG1212	[Cell envelope biogenesis, outer membrane]	1e-73	NOT_PHAGE	KdsB, CMP-2-keto-3-deoxyoctulosonic acid synthetase .
MH0071.scaffold11541_1	30435	32765	-	COG5009	[Cell envelope biogenesis, outer membrane]	e-124	NOT_PHAGE	MrcA, Membrane carboxypeptidase/penicillin-binding protein .
MH0062.scaffold39214_1	359	1138	+	COG2887	[DNA replication, recombination, and repair]	0.0002	NOT_PHAGE	RecB family exonuclease .
MH0062.scaffold39214_1	1221	3101	+	COG0358	[DNA replication, recombination, and repair]	4e-17	NOT_PHAGE	DnaG, DNA primase (bacterial type) .
MH0062.scaffold39214_1	3098	6247	+	COG0587	[DNA replication, recombination, and repair]	e-121	NOT_PHAGE	DnaE, DNA polymerase III, alpha subunit .
MH0062.scaffold39214_1	7102	8070	+	COG0820	[General function prediction only]	3e-24	NOT_PHAGE	Predicted Fe-S-cluster redox enzyme .
MH0062.scaffold39214_1	8370	9368	+	COG0175	[Amino acid transport and metabolism / Coenzyme metabolism]	2e-17	NOT_PHAGE	CysH, 3'-phosphoadenosine 5'-phosphosulfate sulfotransferase (PAPS reductase)/FAD synthetase and related enzymes .
MH0062.scaffold39214_1	10706	11431	+	NA	NA	NA	NA	NA
MH0062.scaffold39214_1	13718	16690	+	COG1328	[Nucleotide transport and metabolism]	6e-36	NOT_PHAGE	NrdD, Oxygen-sensitive ribonucleoside-triphosphate reductase .
MH0062.scaffold39214_1	18866	19117	-	NONE	NONE	5e-07	PHAGE	pfam04688, Phage_holin, Phage lysis protein, holin. This family constitutes holin proteins from the dsDNA Siphidoviridae group bacteriophages. Most bacteriophages require an endolysin and a holin for host lysis. During late gene expression, holins accumulate and oligomerize in the host cell membrane. They then suddenly trigger to permeabilize the membrane, which causes lysis by allowing endolysin…
MH0062.scaffold39214_1	19478	20491	-	COG0860	[Cell envelope biogenesis, outer membrane]	3e-17	NOT_PHAGE	AmiC, N-acetylmuramoyl-L-alanine amidase .
MH0062.scaffold39214_1	21475	22251	-	NA	NA	NA	NA	NA
MH0006.scaffold87784_2	255	992	-	NONE	NONE	2e-09	PHAGE	PHA00430, PHA00430, tail fiber protein.
MH0006.scaffold87784_2	982	1950	-	NA	NA	NA	NA	NA
MH0006.scaffold87784_2	1947	6785	-	COG0419	[DNA replication, recombination, and repair]	8e-11	NOT_PHAGE	SbcC, ATPase involved in DNA repair .
MH0006.scaffold87784_2	7531	8415	-	NA	NA	NA	NA	NA
MH0006.scaffold87784_2	9851	11080	-	NA	NA	NA	NA	NA
MH0006.scaffold87784_2	11094	11741	-	NA	NA	NA	NA	NA
MH0006.scaffold87784_2	15177	15980	+	COG0270	[DNA replication, recombination, and repair]	1e-25	NOT_PHAGE	Dcm, Site-specific DNA methylase .
MH0006.scaffold87784_2	17207	18394	+	COG1690	[Function unknown]	1e-47	NOT_PHAGE	RtcB, Uncharacterized conserved protein .
MH0006.scaffold87784_2	18889	19653	+	COG1397	[Posttranslational modification, protein turnover, chaperones]	9e-35	NOT_PHAGE	DraG, ADP-ribosylglycohydrolase .
MH0006.scaffold87784_2	20246	20857	+	NA	NA	NA	NA	NA
MH0006.scaffold87784_2	20933	23395	-	NONE	NONE	0.005	PHAGE	TIGR01641, phageSPP1_gp7, This fragment-mode HMM describes a region of about 110 amino acids found exclusively in phage-related proteins, internally or toward the C-terminus. One member, gp7 of phage SPP1, appears involved in head morphogenesis.
MH0006.scaffold87784_2	23570	24994	-	NONE	NONE	4e-17	PHAGE	pfam05133, Phage_prot_Gp6, Phage portal protein, SPP1 Gp6-like. This protein forms a hole, or portal, that enables DNA passage during packaging and ejection. It also forms the junction between the phage head (capsid) and the tail proteins. During SPP1 morphogenesis, Gp6 participates in the procapsid assembly reaction. This family also includes family Phage_min_cap, pfam05126.
MH0006.scaffold87784_2	25006	26433	-	COG1783	[General function prediction only]	0.007	PHAGE	XtmB, Phage terminase large subunit .
MH0006.scaffold87784_2	27267	27878	-	NA	NA	NA	NA	NA
MH0006.scaffold87784_2	27856	28974	-	COG1475	[Transcription]	0.0002	NOT_PHAGE	Spo0J, Predicted transcriptional regulators .
MH0006.scaffold87784_2	30816	31628	-	COG1475	[Transcription]	3e-07	NOT_PHAGE	Spo0J, Predicted transcriptional regulators .
MH0006.scaffold87784_2	32390	33016	-	NONE	NONE	2e-19	PHAGE	pfam05869, Dam, DNA N-6-adenine-methyltransferase (Dam). This family consists of several bacterial and phage DNA N-6-adenine-methyltransferase (Dam) like sequences.
MH0006.scaffold87784_2	33458	34003	-	COG1484	[DNA replication, recombination, and repair]	2e-09	NOT_PHAGE	DnaC, DNA replication protein .
MH0006.scaffold87784_2	34038	34871	-	NONE	NONE	0.042	NOT_PHAGE	pfam07120, DUF1376, Protein of unknown function (DUF1376). This family consists of several hypothetical bacterial proteins of around 95 residues in length. The function of this family is unknown.
MH0006.scaffold87784_2	34882	35640	-	NA	NA	NA	NA	NA
MH0006.scaffold87784_2	37977	38711	-	COG1235	[General function prediction only]	3e-09	NOT_PHAGE	PhnP, Metal-dependent hydrolases of the beta-lactamase superfamily I .
MH0006.scaffold87784_2	38711	39700	-	COG3723	[DNA replication, recombination, and repair]	5e-48	NOT_PHAGE	RecT, Recombinational DNA repair protein (RecE pathway) .
MH0006.scaffold87784_2	39712	41706	-	COG0419	[DNA replication, recombination, and repair]	8e-15	NOT_PHAGE	SbcC, ATPase involved in DNA repair .
MH0006.scaffold87784_2	44590	45744	-	NONE	NONE	8e-17	NOT_PHAGE	cd01185, INT_Tn4399, Tn4399 and related integrases, DNA breaking-rejoining enzymes, integrase/recombinases, N- and C-terminal domains. This CD includes various bacterial integrases, including cLV25, a Bacteroides fragilis chromosomal transfer factor integrase similar to the Bacteroides mobilizable transposon, Tn4399, integrase..
V1.CD-9.scaffold77327_1	1735	2391	-	COG1397	[Posttranslational modification, protein turnover, chaperones]	4e-27	NOT_PHAGE	DraG, ADP-ribosylglycohydrolase .
V1.CD-9.scaffold77327_1	3785	4798	-	COG4974	[DNA replication, recombination, and repair]	5e-45	NOT_PHAGE	XerD, Site-specific recombinase XerD .
V1.CD-9.scaffold77327_1	4807	5814	-	COG4974	[DNA replication, recombination, and repair]	5e-22	NOT_PHAGE	XerD, Site-specific recombinase XerD .
V1.CD-9.scaffold77327_1	5795	7036	-	COG4974	[DNA replication, recombination, and repair]	3e-22	NOT_PHAGE	XerD, Site-specific recombinase XerD .
V1.CD-9.scaffold77327_1	7183	8016	-	NA	NA	NA	NA	NA
V1.CD-9.scaffold77327_1	8035	8517	-	NA	NA	NA	NA	NA
V1.CD-9.scaffold77327_1	10067	10612	+	NA	NA	NA	NA	NA
V1.CD-9.scaffold77327_1	10651	11289	+	NA	NA	NA	NA	NA
V1.CD-9.scaffold77327_1	11331	12401	+	NA	NA	NA	NA	NA
V1.CD-9.scaffold77327_1	12431	12739	+	NA	NA	NA	NA	NA
V1.CD-9.scaffold77327_1	12741	13052	+	NA	NA	NA	NA	NA
V1.CD-9.scaffold77327_1	13054	13542	+	NA	NA	NA	NA	NA
V1.CD-9.scaffold77327_1	13977	14486	+	NA	NA	NA	NA	NA
V1.CD-9.scaffold77327_1	14496	15167	+	NA	NA	NA	NA	NA
MH0085.scaffold14272_1	739	1593	+	COG3617	[Transcription]	3e-21	PHAGE	Prophage antirepressor .
MH0085.scaffold14272_1	1912	2712	+	COG3645	[Function unknown]	1e-06	PHAGE	Uncharacterized phage-encoded protein .
MH0085.scaffold14272_1	8898	10004	-	NONE	NONE	0.038	NOT_PHAGE	pfam09950, DUF2184, Uncharacterized protein conserved in bacteria (DUF2184). This domain, found in various hypothetical bacterial proteins, has no known function.
MH0085.scaffold14272_1	10586	11227	-	NA	NA	NA	NA	NA
MH0085.scaffold14272_1	11297	12694	-	COG5178	[RNA processing and modification]	0.007	NOT_PHAGE	PRP8, U5 snRNP spliceosome subunit .
MH0085.scaffold14272_1	12707	13975	-	COG1783	[General function prediction only]	6e-35	PHAGE	XtmB, Phage terminase large subunit .
MH0085.scaffold14272_1	17446	18240	-	NONE	NONE	0.036	NOT_PHAGE	cd01713, PAPS_reductase, This domain is found in phosphoadenosine phosphosulphate (PAPS) reductase enzymes or PAPS sulphotransferase. PAPS reductase is part of the adenine nucleotide alpha hydrolases superfamily also including N type ATP PPases and ATP sulphurylases. A highly modified version of the P loop, the fingerprint peptide of mononucleotide-binding proteins, is present in the active site …
MH0085.scaffold14272_1	18604	19539	-	COG0863	[DNA replication, recombination, and repair]	4e-24	NOT_PHAGE	DNA modification methylase .
MH0085.scaffold14272_1	20528	21349	-	NA	NA	NA	NA	NA
MH0066.scaffold7359_7	204	1982	-	COG4626	[General function prediction only]	e-109	PHAGE	Phage terminase-like protein, large subunit .
MH0066.scaffold7359_7	1957	2325	-	NONE	NONE	0.016	PHAGE	pfam05119, Terminase_4, Phage terminase, small subunit.
MH0066.scaffold7359_7	2340	2657	-	COG3183	[Defense mechanisms]	0.0007	NOT_PHAGE	Predicted restriction endonuclease .
MH0066.scaffold7359_7	2888	3421	-	NA	NA	NA	NA	NA
MH0066.scaffold7359_7	3466	3846	-	COG0629	[DNA replication, recombination, and repair]	1e-15	NOT_PHAGE	Ssb, Single-stranded DNA-binding protein .
MH0066.scaffold7359_7	3839	4753	-	NA	NA	NA	NA	NA
MH0066.scaffold7359_7	4931	5368	-	NA	NA	NA	NA	NA
MH0066.scaffold7359_7	5361	6365	-	COG0497	[DNA replication, recombination, and repair]	0.001	NOT_PHAGE	RecN, ATPase involved in DNA repair .
MH0066.scaffold7359_7	6565	7116	-	NA	NA	NA	NA	NA
MH0066.scaffold7359_7	7107	9917	-	COG0358	[DNA replication, recombination, and repair]	3e-06	NOT_PHAGE	DnaG, DNA primase (bacterial type) .
MH0066.scaffold7359_7	9970	10317	-	NONE	NONE	0.006	PHAGE	TIGR01764, excise, An excisionase, or Xis protein, is a small protein that binds and promotes excisive recombination; it is not enzymatically active. This model represents a number of putative excisionases and related proteins from temperate phage, plasmids, and transposons, as well as DNA binding domains of other proteins, such as a DNA modification methylase. This model identifies mostly small …
MH0066.scaffold7359_7	10314	10871	-	NONE	NONE	0.048	NOT_PHAGE	pfam01381, HTH_3, Helix-turn-helix. This large family of DNA binding helix-turn helix proteins includes Cro and CI.
MH0066.scaffold7359_7	11145	11552	+	NA	NA	NA	NA	NA
MH0066.scaffold7359_7	11572	12102	+	NA	NA	NA	NA	NA
MH0066.scaffold7359_7	12152	12931	+	NONE	NONE	0.011	NOT_PHAGE	PRK06347, PRK06347, autolysin; Reviewed.
MH0066.scaffold7359_7	13107	14435	+	COG4974	[DNA replication, recombination, and repair]	1e-11	NOT_PHAGE	XerD, Site-specific recombinase XerD .
MH0040.scaffold3535_1	4763	5638	-	NA	NA	NA	NA	NA
MH0040.scaffold3535_1	5661	6293	-	NONE	NONE	2e-06	PHAGE	pfam06810, Phage_GP20, Phage minor structural protein GP20. This family consists of several phage minor structural protein GP20 sequences of around 180 residues in length. The function of this family is unknown.
MH0040.scaffold3535_1	6610	8178	-	COG2369	[Function unknown]	2e-05	PHAGE	Uncharacterized protein, homolog of phage Mu protein gp30 .
MH0040.scaffold3535_1	8175	9653	-	NONE	NONE	6e-39	PHAGE	pfam05133, Phage_prot_Gp6, Phage portal protein, SPP1 Gp6-like. This protein forms a hole, or portal, that enables DNA passage during packaging and ejection. It also forms the junction between the phage head (capsid) and the tail proteins. During SPP1 morphogenesis, Gp6 participates in the procapsid assembly reaction. This family also includes family Phage_min_cap, pfam05126.
MH0040.scaffold3535_1	9746	10990	-	COG1783	[General function prediction only]	2e-63	PHAGE	XtmB, Phage terminase large subunit .
MH0040.scaffold3535_1	14021	15919	-	COG3378	[General function prediction only]	2e-47	NOT_PHAGE	Predicted ATPase .
MH0040.scaffold3535_1	16293	18002	-	COG0417	[DNA replication, recombination, and repair]	0.002	NOT_PHAGE	PolB, DNA polymerase elongation subunit (family B) .
MH0040.scaffold3535_1	18568	20364	-	NONE	NONE	2e-07	PHAGE	TIGR01618, phage_P_loop, This model represents an uncharacterized family of proteins from a number of phage of Gram-positive bacteria. This protein contains a P-loop motif, G/A-X-X-G-X-G-K-T near its amino end. The function of this protein is unknown.
MH0040.scaffold3535_1	21708	23030	-	COG0553	[Transcription / DNA replication, recombination, and repair]	2e-16	NOT_PHAGE	HepA, Superfamily II DNA/RNA helicases, SNF2 family .
MH0040.scaffold3535_1	23415	24035	-	NA	NA	NA	NA	NA
MH0040.scaffold3535_1	24641	25441	-	COG0863	[DNA replication, recombination, and repair]	9e-21	NOT_PHAGE	DNA modification methylase .
MH0037.scaffold1344_4	156	401	-	COG1476	[Transcription]	0.0004	NOT_PHAGE	Predicted transcriptional regulators .
MH0037.scaffold1344_4	398	556	-	NONE	NONE	0.002	NOT_PHAGE	cd00093, HTH_XRE, Helix-turn-helix XRE-family like proteins. Prokaryotic DNA binding proteins belonging to the xenobiotic response element family of transcriptional regulators..
MH0037.scaffold1344_4	622	1068	-	COG1396	[Transcription]	0.0006	NOT_PHAGE	HipB, Predicted transcriptional regulators .
MH0037.scaffold1344_4	1284	1673	-	NONE	NONE	5e-14	PHAGE	pfam06356, DUF1064, Protein of unknown function (DUF1064). This family consists of several phage and bacterial proteins of unknown function.
MH0037.scaffold1344_4	1711	2028	-	NA	NA	NA	NA	NA
MH0037.scaffold1344_4	2075	2857	-	NA	NA	NA	NA	NA
MH0037.scaffold1344_4	2870	3262	-	COG0629	[DNA replication, recombination, and repair]	6e-20	NOT_PHAGE	Ssb, Single-stranded DNA-binding protein .
MH0037.scaffold1344_4	3573	4094	-	NA	NA	NA	NA	NA
MH0037.scaffold1344_4	4075	4854	-	NA	NA	NA	NA	NA
MH0037.scaffold1344_4	4854	5339	-	NONE	NONE	1e-17	PHAGE	pfam05565, Sipho_Gp157, Siphovirus Gp157. This family contains both viral and bacterial proteins which are related to the Gp157 protein of the Streptococcus thermophilus SFi bacteriophages. It is thought that bacteria possessing the gene coding for this protein have an increased resistance to the bacteriophage.
MH0037.scaffold1344_4	5481	6014	-	COG3584	[Function unknown]	5e-09	NOT_PHAGE	Uncharacterized protein conserved in bacteria .
MH0037.scaffold1344_4	6416	7063	-	COG3646	[Function unknown]	3e-15	PHAGE	Uncharacterized phage-encoded protein .
MH0037.scaffold1344_4	7060	7266	-	COG1396	[Transcription]	0.001	NOT_PHAGE	HipB, Predicted transcriptional regulators .
MH0037.scaffold1344_4	8028	8972	+	NA	NA	NA	NA	NA
MH0037.scaffold1344_4	9576	10904	+	COG1961	[DNA replication, recombination, and repair]	6e-17	NOT_PHAGE	PinR, Site-specific recombinases, DNA invertase Pin homologs .
MH0037.scaffold1344_4	10978	11298	-	NA	NA	NA	NA	NA
MH0037.scaffold1344_4	11314	11700	-	NA	NA	NA	NA	NA
MH0037.scaffold1344_4	11708	12010	-	NA	NA	NA	NA	NA
MH0037.scaffold1344_4	12259	12891	-	NA	NA	NA	NA	NA
MH0037.scaffold1344_4	13387	13794	-	NA	NA	NA	NA	NA
MH0037.scaffold1344_4	14737	15345	-	NA	NA	NA	NA	NA
MH0037.scaffold1344_4	15743	16045	-	NA	NA	NA	NA	NA
MH0037.scaffold1344_4	16068	16868	-	NA	NA	NA	NA	NA
MH0037.scaffold1344_4	16887	17678	-	NA	NA	NA	NA	NA
V1.CD-3.scaffold16967_2	1372	3510	-	NA	NA	NA	NA	NA
V1.CD-3.scaffold16967_2	3524	3898	-	NONE	NONE	0.009	NOT_PHAGE	pfam08634, Pet127, Mitochondrial protein Pet127. Pet127 has been implicated in mitochondrial RNA stability and/or processing and is localized to the mitochondrial membrane.
V1.CD-3.scaffold16967_2	3910	6261	-	COG5185	[Cell division and chromosome partitioning]	3e-05	NOT_PHAGE	HEC1, Protein involved in chromosome segregation, interacts with SMC proteins .
V1.CD-3.scaffold16967_2	6276	6842	-	NONE	NONE	3e-05	PHAGE	pfam06854, Phage_Gp15, Bacteriophage Gp15 protein. This family consists of bacteriophage Gp15 proteins and related bacterial sequences. The function of this family is unknown.
V1.CD-3.scaffold16967_2	6839	7306	-	NA	NA	NA	NA	NA
V1.CD-3.scaffold16967_2	7360	7761	-	NA	NA	NA	NA	NA
V1.CD-3.scaffold16967_2	8787	9140	-	NA	NA	NA	NA	NA
V1.CD-3.scaffold16967_2	9143	9499	-	NONE	NONE	6e-15	PHAGE	cd08053, Yqbg, Putative Head-Tail Connector Protein Yqbg from Bacillus subtilis and similar proteins. The uncharacterized Bacillus subtilis Yqbg protein, whose gene is part of the unusual genetic element called skin, shows a similar structure to the connector proteins gp6 and gp15 from bacteriophage HK97 and SPP1, respectively. gp6 and gp15 are critical in the assembly of the connector, a special…
V1.CD-3.scaffold16967_2	9679	10587	-	NA	NA	NA	NA	NA
V1.CD-3.scaffold16967_2	10602	11165	-	NONE	NONE	2e-17	PHAGE	pfam06810, Phage_GP20, Phage minor structural protein GP20. This family consists of several phage minor structural protein GP20 sequences of around 180 residues in length. The function of this family is unknown.
V1.CD-3.scaffold16967_2	11508	13286	-	NONE	NONE	1e-16	PHAGE	pfam06152, Phage_min_cap2, Phage minor capsid protein 2. Family of related phage minor capsid proteins.
V1.CD-3.scaffold16967_2	13287	14645	-	NONE	NONE	3e-26	PHAGE	TIGR01542, A118_put_portal, This model represents a family of phage minor structural proteins. The protein is suggested to be the head-tail connector, or portal protein, on the basis of its position in the phage gene order, its presence in mature phage, its size, and its conservation across a number of complete genomes of tailed phage that lack other candidate portal proteins. Several other known…
V1.CD-3.scaffold16967_2	15328	16098	-	NONE	NONE	2e-28	PHAGE	TIGR01547, phage_term_2, This model detects members of a highly divergent family of the large subunit of phage terminase. All members are encoded by phage genomes or within prophage regions of bacterial genomes. This is a distinct family from pfam03354.
V1.CD-3.scaffold16967_2	18106	18723	+	NA	NA	NA	NA	NA
V1.CD-3.scaffold16967_2	19812	20192	-	COG4570	[DNA replication, recombination, and repair]	3e-23	NOT_PHAGE	Rus, Holliday junction resolvase .
V1.CD-3.scaffold16967_2	20485	22620	-	COG3598	[DNA replication, recombination, and repair]	2e-62	NOT_PHAGE	RepA, RecA-family ATPase .
V1.CD-3.scaffold16967_2	22692	24284	-	COG1061	[Transcription / DNA replication, recombination, and repair]	4e-64	NOT_PHAGE	SSL2, DNA or RNA helicases of superfamily II .
V1.CD-3.scaffold16967_2	24288	24743	-	NA	NA	NA	NA	NA
V1.CD-3.scaffold16967_2	24763	25836	-	COG1245	[General function prediction only]	0.034	NOT_PHAGE	Predicted ATPase, RNase L inhibitor (RLI) homolog .
V1.CD-3.scaffold16967_2	25836	26897	-	COG1196	[Cell division and chromosome partitioning]	0.004	NOT_PHAGE	Smc, Chromosome segregation ATPases .
V1.CD-3.scaffold16967_2	27120	27650	-	COG1396	[Transcription]	6e-06	NOT_PHAGE	HipB, Predicted transcriptional regulators .
V1.CD-3.scaffold16967_2	27798	29111	-	COG0175	[Amino acid transport and metabolism / Coenzyme metabolism]	2e-09	NOT_PHAGE	CysH, 3'-phosphoadenosine 5'-phosphosulfate sulfotransferase (PAPS reductase)/FAD synthetase and related enzymes .
V1.CD-3.scaffold16967_2	29108	29584	-	COG3773	[Cell envelope biogenesis, outer membrane]	8e-07	NOT_PHAGE	SleB, Cell wall hydrolyses involved in spore germination .
V1.CD-3.scaffold16967_2	29890	30888	+	NA	NA	NA	NA	NA
V1.CD-3.scaffold16967_2	31365	32012	+	COG1974	[Transcription / Signal transduction mechanisms]	2e-15	NOT_PHAGE	LexA, SOS-response transcriptional repressors (RecA-mediated autopeptidases) .
V1.CD-3.scaffold16967_2	32188	32517	+	NA	NA	NA	NA	NA
V1.CD-3.scaffold16967_2	32650	33693	+	COG4974	[DNA replication, recombination, and repair]	3e-13	NOT_PHAGE	XerD, Site-specific recombinase XerD .
V1.CD-3.scaffold16967_2	34758	35132	+	COG1725	[Transcription]	6e-22	NOT_PHAGE	Predicted transcriptional regulators .
V1.CD-3.scaffold16967_2	35129	36046	+	COG1131	[Defense mechanisms]	1e-48	NOT_PHAGE	CcmA, ABC-type multidrug transport system, ATPase component .
V1.CD-3.scaffold16967_2	36057	38561	+	COG1277	[General function prediction only]	0.035	NOT_PHAGE	NosY, ABC-type transport system involved in multi-copper enzyme maturation, permease component .
V1.CD-3.scaffold16967_2	39350	39655	-	NA	NA	NA	NA	NA
V1.CD-3.scaffold16967_2	39789	41153	+	NA	NA	NA	NA	NA
V1.CD-3.scaffold16967_2	41774	42400	-	COG0188	[DNA replication, recombination, and repair]	6e-16	NOT_PHAGE	GyrA, Type IIA topoisomerase (DNA gyrase/topo II, topoisomerase IV), A subunit .
MH0059.scaffold93560_1	48	2093	+	NONE	NONE	1e-08	NOT_PHAGE	pfam00665, rve, Integrase core domain. Integrase mediates integration of a DNA copy of the viral genome into the host chromosome. Integrase is composed of three domains. The amino-terminal domain is a zinc binding domain pfam02022. This domain is the central catalytic domain. The carboxyl terminal domain that is a non-specific DNA binding domain pfam00552. The catalytic domain acts as an endonucl…
MH0059.scaffold93560_1	2101	3039	+	COG2842	[General function prediction only]	2e-12	NOT_PHAGE	Uncharacterized ATPase, putative transposase .
MH0059.scaffold93560_1	4201	4896	+	NA	NA	NA	NA	NA
MH0059.scaffold93560_1	5310	5612	+	NA	NA	NA	NA	NA
MH0059.scaffold93560_1	8518	9768	+	COG1783	[General function prediction only]	4e-09	PHAGE	XtmB, Phage terminase large subunit .
MH0059.scaffold93560_1	9768	11183	+	NONE	NONE	4e-70	PHAGE	TIGR01542, A118_put_portal, This model represents a family of phage minor structural proteins. The protein is suggested to be the head-tail connector, or portal protein, on the basis of its position in the phage gene order, its presence in mature phage, its size, and its conservation across a number of complete genomes of tailed phage that lack other candidate portal proteins. Several other known…
MH0059.scaffold93560_1	11176	12708	+	NONE	NONE	6e-78	PHAGE	pfam06152, Phage_min_cap2, Phage minor capsid protein 2. Family of related phage minor capsid proteins.
V1.UC-10.scaffold18635_2	1208	1579	-	NA	NA	NA	NA	NA
V1.UC-10.scaffold18635_2	1595	2173	-	NONE	NONE	1e-12	PHAGE	TIGR01603, maj_tail_phi13, This model describes a set of proteins that share low levels of sequence similarity but similar lengths and similar patterns of charged, hydrophobic, and Gly/Pro residues. All members (except one attributed to mouse embryo cDNA) belong to phage of Gram-positive bacteria. Several are identified as phage major tail proteins. Some members of this family have additional C-t…
V1.UC-10.scaffold18635_2	2177	2539	-	NA	NA	NA	NA	NA
V1.UC-10.scaffold18635_2	2536	2934	-	NONE	NONE	3e-07	PHAGE	TIGR01725, phge_HK97_gp10, This model represents an uncharacterized, highly divergent bacteriophage family. The family includes gp10 from HK022 and HK97. It appears related to TIGR01635, a phage morphogenesis family believed to be involved in tail completion.
V1.UC-10.scaffold18635_2	2936	3265	-	COG5614	[General function prediction only]	9e-10	PHAGE	Bacteriophage head-tail adaptor .
V1.UC-10.scaffold18635_2	3262	3540	-	NONE	NONE	0.008	PHAGE	cd08054, gp6, Head-Tail Connector Protein gp6 of Bacteriophage HK97 and similar proteins. The bacteriophage HK97 gp6 protein is critical in the assembly of the connector, a specialized structure that serves as an interface for head and tail attachment, as well as a point at which DNA exits the head during infection by the bacteriophage. It forms a dodecameric ring structure that comprises the mid…
V1.UC-10.scaffold18635_2	3830	5074	-	NONE	NONE	5e-46	PHAGE	TIGR01554, major_cap_HK97, This model family represents the major capsid protein component of the heads (capsids) of bacteriophage HK97, phi-105, P27, and related phage. This model represents one of several analogous families lacking detectable sequence similarity. The gene encoding this component is typically located in an operon encoding the small and large terminase subunits, the portal protei…
V1.UC-10.scaffold18635_2	5090	5812	-	COG0740	[Posttranslational modification, protein turnover, chaperones / Intracellular trafficking and secretion]	1e-29	NOT_PHAGE	ClpP, Protease subunit of ATP-dependent Clp proteases .
V1.UC-10.scaffold18635_2	5809	7011	-	COG4695	[Function unknown]	3e-50	PHAGE	Phage-related protein .
V1.UC-10.scaffold18635_2	7088	8806	-	COG4626	[General function prediction only]	e-108	PHAGE	Phage terminase-like protein, large subunit .
V1.UC-10.scaffold18635_2	8823	9134	-	NA	NA	NA	NA	NA
V1.UC-10.scaffold18635_2	9168	9737	+	NA	NA	NA	NA	NA
V1.UC-10.scaffold18635_2	10313	10633	-	COG0629	[DNA replication, recombination, and repair]	2e-14	NOT_PHAGE	Ssb, Single-stranded DNA-binding protein .
V1.UC-10.scaffold18635_2	10685	11176	-	NA	NA	NA	NA	NA
V1.UC-10.scaffold18635_2	11173	11601	-	NA	NA	NA	NA	NA
V1.UC-10.scaffold18635_2	11615	12568	-	COG1196	[Cell division and chromosome partitioning]	0.0003	NOT_PHAGE	Smc, Chromosome segregation ATPases .
V1.UC-10.scaffold18635_2	12593	13075	-	NA	NA	NA	NA	NA
O2.UC-19.scaffold72794_6	355	1092	-	NA	NA	NA	NA	NA
O2.UC-19.scaffold72794_6	1541	2227	-	NONE	NONE	2e-17	PHAGE	pfam11041, DUF2612, Protein of unknown function (DUF2612). This is a phage protein family expressed from a range of Proteobacteria species. The function is not known.
O2.UC-19.scaffold72794_6	2230	3645	-	COG3299	[Function unknown]	0.0005	PHAGE	XkdT, Uncharacterized homolog of phage Mu protein gp47 .
O2.UC-19.scaffold72794_6	3993	4655	-	NA	NA	NA	NA	NA
O2.UC-19.scaffold72794_6	5258	6160	-	NA	NA	NA	NA	NA
O2.UC-19.scaffold72794_6	6492	7160	-	NA	NA	NA	NA	NA
O2.UC-19.scaffold72794_6	7162	9000	-	COG5281	[Function unknown]	1e-08	PHAGE	Phage-related minor tail protein .
O2.UC-19.scaffold72794_6	10148	11233	-	NONE	NONE	1e-57	NOT_PHAGE	pfam11863, DUF3383, Protein of unknown function (DUF3383). This family of proteins are functionally uncharacterized. This protein is found in bacteria and viruses. Proteins in this family are typically between 356 to 501 amino acids in length.
O2.UC-19.scaffold72794_6	13522	14379	+	NA	NA	NA	NA	NA
O2.UC-19.scaffold72794_6	13429	13563	-	COG4834	[Function unknown]	1e-06	NOT_PHAGE	Uncharacterized protein conserved in bacteria .
O2.UC-19.scaffold72794_6	14913	16079	-	COG3566	[Function unknown]	3e-29	NOT_PHAGE	Uncharacterized protein conserved in bacteria .
O2.UC-19.scaffold72794_6	16131	17018	-	COG2369	[Function unknown]	2e-22	PHAGE	Uncharacterized protein, homolog of phage Mu protein gp30 .
O2.UC-19.scaffold72794_6	16981	18309	-	COG3567	[Function unknown]	2e-40	NOT_PHAGE	Uncharacterized protein conserved in bacteria .
O2.UC-19.scaffold72794_6	18318	20096	-	COG5362	[General function prediction only]	7e-31	PHAGE	Phage-related terminase .
O2.UC-19.scaffold72794_6	20531	21220	-	COG0603	[General function prediction only]	2e-56	NOT_PHAGE	Predicted PP-loop superfamily ATPase .
MH0064.scaffold8188_26	393	1418	-	NA	NA	NA	NA	NA
MH0064.scaffold8188_26	1432	2121	-	NONE	NONE	6e-05	PHAGE	pfam06810, Phage_GP20, Phage minor structural protein GP20. This family consists of several phage minor structural protein GP20 sequences of around 180 residues in length. The function of this family is unknown.
MH0064.scaffold8188_26	2939	4468	-	COG2369	[Function unknown]	0.018	PHAGE	Uncharacterized protein, homolog of phage Mu protein gp30 .
MH0064.scaffold8188_26	5022	5711	-	NA	NA	NA	NA	NA
MH0064.scaffold8188_26	5701	7176	-	NONE	NONE	2e-40	PHAGE	pfam05133, Phage_prot_Gp6, Phage portal protein, SPP1 Gp6-like. This protein forms a hole, or portal, that enables DNA passage during packaging and ejection. It also forms the junction between the phage head (capsid) and the tail proteins. During SPP1 morphogenesis, Gp6 participates in the procapsid assembly reaction. This family also includes family Phage_min_cap, pfam05126.
MH0064.scaffold8188_26	7200	8459	-	COG1783	[General function prediction only]	5e-46	PHAGE	XtmB, Phage terminase large subunit .
MH0064.scaffold8188_26	12939	13568	-	NONE	NONE	0.009	NOT_PHAGE	pfam09371, Tex_N, Tex-like protein N-terminal domain. This presumed domain is found at the N-terminus of protein tex from Bordetella pertussis. This protein defines a novel family of prokaryotic transcriptional accessory factors.
MH0064.scaffold8188_26	14399	14932	+	NA	NA	NA	NA	NA
MH0064.scaffold8188_26	13556	14419	-	NONE	NONE	7e-05	NOT_PHAGE	cd00315, Cyt_C5_DNA_methylase, Cytosine-C5 specific DNA methylases; Methyl transfer reactions play an important role in many aspects of biology. Cytosine-specific DNA methylases are found both in prokaryotes and eukaryotes. DNA methylation, or the covalent addition of a methyl group to cytosine within the context of the CpG dinucleotide, has profound effects on the mammalian genome. These effects…
MH0064.scaffold8188_26	14980	16236	-	NA	NA	NA	NA	NA
MH0064.scaffold8188_26	16297	17121	-	NA	NA	NA	NA	NA
MH0064.scaffold8188_26	17621	18673	-	COG3723	[DNA replication, recombination, and repair]	1e-44	NOT_PHAGE	RecT, Recombinational DNA repair protein (RecE pathway) .
MH0064.scaffold8188_26	19097	19999	-	COG3064	[Cell envelope biogenesis, outer membrane]	0.005	NOT_PHAGE	TolA, Membrane protein involved in colicin uptake .
MH0064.scaffold8188_26	20173	20820	-	COG5377	[DNA replication, recombination, and repair]	2e-15	PHAGE	Phage-related protein, predicted endonuclease .
MH0037.scaffold3610_7	608	1351	-	COG1126	[Amino acid transport and metabolism]	3e-92	NOT_PHAGE	GlnQ, ABC-type polar amino acid transport system, ATPase component .
MH0037.scaffold3610_7	1344	1952	-	COG0765	[Amino acid transport and metabolism]	1e-33	NOT_PHAGE	HisM, ABC-type amino acid transport system, permease component .
MH0037.scaffold3610_7	2003	2446	-	COG0765	[Amino acid transport and metabolism]	4e-28	NOT_PHAGE	HisM, ABC-type amino acid transport system, permease component .
MH0037.scaffold3610_7	2928	3767	-	COG0834	[Amino acid transport and metabolism / Signal transduction mechanisms]	8e-24	NOT_PHAGE	HisJ, ABC-type amino acid transport/signal transduction systems, periplasmic component/domain .
MH0037.scaffold3610_7	3977	4885	-	COG1609	[Transcription]	3e-63	NOT_PHAGE	PurR, Transcriptional regulators .
MH0037.scaffold3610_7	5216	5536	-	COG1961	[DNA replication, recombination, and repair]	7e-17	NOT_PHAGE	PinR, Site-specific recombinases, DNA invertase Pin homologs .
MH0037.scaffold3610_7	6046	6399	+	COG2361	[Function unknown]	4e-19	NOT_PHAGE	Uncharacterized conserved protein .
MH0037.scaffold3610_7	7403	7876	+	NONE	NONE	0.015	NOT_PHAGE	PRK07418, PRK07418, acetolactate synthase 3 catalytic subunit; Reviewed.
MH0037.scaffold3610_7	7830	8537	+	NONE	NONE	0.046	NOT_PHAGE	pfam01148, CTP_transf_1, Cytidylyltransferase family. The members of this family are integral membrane protein cytidylyltransferases. The family includes phosphatidate cytidylyltransferase EC:2.7.7.41 as well as Sec59 from yeast. Sec59 is a dolichol kinase EC:2.7.1.108.
MH0037.scaffold3610_7	8588	8761	-	NONE	NONE	1e-05	PHAGE	TIGR01764, excise, An excisionase, or Xis protein, is a small protein that binds and promotes excisive recombination; it is not enzymatically active. This model represents a number of putative excisionases and related proteins from temperate phage, plasmids, and transposons, as well as DNA binding domains of other proteins, such as a DNA modification methylase. This model identifies mostly small …
MH0037.scaffold3610_7	9118	10242	-	NA	NA	NA	NA	NA
MH0037.scaffold3610_7	10677	11600	-	NA	NA	NA	NA	NA
MH0037.scaffold3610_7	12069	13805	+	COG1961	[DNA replication, recombination, and repair]	8e-12	NOT_PHAGE	PinR, Site-specific recombinases, DNA invertase Pin homologs .
MH0064.scaffold10296_19	1851	4364	-	COG0553	[Transcription / DNA replication, recombination, and repair]	8e-07	NOT_PHAGE	HepA, Superfamily II DNA/RNA helicases, SNF2 family .
MH0064.scaffold10296_19	4483	5163	+	NA	NA	NA	NA	NA
MH0064.scaffold10296_19	5369	6481	-	COG0175	[Amino acid transport and metabolism / Coenzyme metabolism]	1e-06	NOT_PHAGE	CysH, 3'-phosphoadenosine 5'-phosphosulfate sulfotransferase (PAPS reductase)/FAD synthetase and related enzymes .
MH0064.scaffold10296_19	6939	7646	-	NA	NA	NA	NA	NA
MH0064.scaffold10296_19	7816	8487	-	NA	NA	NA	NA	NA
MH0064.scaffold10296_19	8808	9467	-	COG4570	[DNA replication, recombination, and repair]	0.001	NOT_PHAGE	Rus, Holliday junction resolvase .
MH0064.scaffold10296_19	10133	10753	-	NONE	NONE	4e-08	PHAGE	pfam06378, DUF1071, Protein of unknown function (DUF1071). This family consists of several hypothetical bacterial and phage proteins of unknown function.
MH0006.scaffold52913_3	10	528	+	NONE	NONE	2e-06	PHAGE	pfam05065, Phage_capsid, Phage capsid family. Family of bacteriophage hypothetical proteins and capsid proteins.
MH0006.scaffold52913_3	531	830	+	NONE	NONE	1e-07	PHAGE	cd08054, gp6, Head-Tail Connector Protein gp6 of Bacteriophage HK97 and similar proteins. The bacteriophage HK97 gp6 protein is critical in the assembly of the connector, a specialized structure that serves as an interface for head and tail attachment, as well as a point at which DNA exits the head during infection by the bacteriophage. It forms a dodecameric ring structure that comprises the mid…
MH0006.scaffold52913_3	852	1184	+	NONE	NONE	6e-05	PHAGE	pfam05521, Phage_H_T_join, Phage head-tail joining protein.
MH0006.scaffold52913_3	1174	1593	+	NA	NA	NA	NA	NA
MH0006.scaffold52913_3	2049	2678	+	NONE	NONE	0.005	PHAGE	TIGR01603, maj_tail_phi13, This model describes a set of proteins that share low levels of sequence similarity but similar lengths and similar patterns of charged, hydrophobic, and Gly/Pro residues. All members (except one attributed to mouse embryo cDNA) belong to phage of Gram-positive bacteria. Several are identified as phage major tail proteins. Some members of this family have additional C-t…
MH0006.scaffold52913_3	2751	3122	+	NA	NA	NA	NA	NA
MH0006.scaffold52913_3	3320	6769	+	COG5280	[Function unknown]	0.0008	PHAGE	Phage-related minor tail protein .
MH0006.scaffold52913_3	7996	8286	-	COG3041	[Function unknown]	3e-25	NOT_PHAGE	Uncharacterized protein conserved in bacteria .
MH0006.scaffold52913_3	8283	8555	-	COG3077	[DNA replication, recombination, and repair]	2e-10	NOT_PHAGE	RelB, DNA-damage-inducible protein J .
MH0006.scaffold52913_3	8951	9691	+	COG4722	[Function unknown]	2e-08	PHAGE	Phage-related protein .
MH0006.scaffold52913_3	9719	12112	+	COG4926	[Function unknown]	4e-20	PHAGE	PblB, Phage-related protein .
MH0050.scaffold7168_1	81	410	+	NA	NA	NA	NA	NA
MH0050.scaffold7168_1	522	1355	+	COG0270	[DNA replication, recombination, and repair]	5e-08	NOT_PHAGE	Dcm, Site-specific DNA methylase .
MH0050.scaffold7168_1	4594	5514	+	NA	NA	NA	NA	NA
MH0050.scaffold7168_1	5511	6341	+	COG1192	[Cell division and chromosome partitioning]	6e-33	NOT_PHAGE	Soj, ATPases involved in chromosome partitioning .
MH0050.scaffold7168_1	6343	7269	+	COG1475	[Transcription]	0.001	NOT_PHAGE	Spo0J, Predicted transcriptional regulators .
MH0050.scaffold7168_1	7443	8192	+	NONE	NONE	1e-10	NOT_PHAGE	pfam08774, VRR_NUC, VRR-NUC domain.
MH0050.scaffold7168_1	9874	11544	+	COG4626	[General function prediction only]	1e-75	PHAGE	Phage terminase-like protein, large subunit .
MH0050.scaffold7168_1	11722	12927	+	COG4695	[Function unknown]	7e-17	PHAGE	Phage-related protein .
MH0050.scaffold7168_1	12927	13706	+	COG0740	[Posttranslational modification, protein turnover, chaperones / Intracellular trafficking and secretion]	4e-23	NOT_PHAGE	ClpP, Protease subunit of ATP-dependent Clp proteases .
MH0050.scaffold7168_1	13725	14936	+	NONE	NONE	3e-21	PHAGE	pfam05065, Phage_capsid, Phage capsid family. Family of bacteriophage hypothetical proteins and capsid proteins.
MH0050.scaffold7168_1	17539	20412	+	COG5280	[Function unknown]	6e-55	PHAGE	Phage-related minor tail protein .
MH0050.scaffold7168_1	20416	21369	+	NONE	NONE	0.0007	PHAGE	pfam05709, Sipho_tail, Phage tail protein. This family consists of several Siphovirus and other phage tail component proteins as well as some bacterial proteins of unknown function.
MH0050.scaffold7168_1	21374	22420	+	NA	NA	NA	NA	NA
MH0084.scaffold50691_1	1985	3067	-	NA	NA	NA	NA	NA
MH0084.scaffold50691_1	3086	4072	-	NONE	NONE	2e-55	PHAGE	pfam11133, Phage_head_fibr, Head fiber protein. This head fiber protein is also refereed to as Gp8.5. Gp8.5 is a structural protein in phage. It is a dispensable head protein.
MH0084.scaffold50691_1	4076	4720	-	NA	NA	NA	NA	NA
MH0084.scaffold50691_1	4940	6454	-	NONE	NONE	2e-16	PHAGE	pfam05133, Phage_prot_Gp6, Phage portal protein, SPP1 Gp6-like. This protein forms a hole, or portal, that enables DNA passage during packaging and ejection. It also forms the junction between the phage head (capsid) and the tail proteins. During SPP1 morphogenesis, Gp6 participates in the procapsid assembly reaction. This family also includes family Phage_min_cap, pfam05126.
MH0084.scaffold50691_1	6465	8759	-	COG1783	[General function prediction only]	5e-25	PHAGE	XtmB, Phage terminase large subunit .
MH0084.scaffold50691_1	9297	10043	-	COG1475	[Transcription]	6e-05	NOT_PHAGE	Spo0J, Predicted transcriptional regulators .
MH0084.scaffold50691_1	10351	11073	-	NONE	NONE	4e-07	NOT_PHAGE	pfam07463, NUMOD4, NUMOD4 motif. NUMOD4 is a putative DNA-binding motif found in homing endonucleases and related proteins.
MH0084.scaffold50691_1	11073	11750	-	COG0175	[Amino acid transport and metabolism / Coenzyme metabolism]	2e-09	NOT_PHAGE	CysH, 3'-phosphoadenosine 5'-phosphosulfate sulfotransferase (PAPS reductase)/FAD synthetase and related enzymes .
MH0084.scaffold50691_1	13568	14434	-	NONE	NONE	2e-28	NOT_PHAGE	pfam12224, Amidoligase_2, Putative amidoligase enzyme. This family of proteins are likely to act as amidoligase enzymes Protein in this family are found in conserved gene neighborhoods encoding a glutamine amidotransferase-like thiol peptidase (in proteobacteria) or an Aig2 family cyclotransferase protein (in firmicutes).
MH0084.scaffold50691_1	14938	15783	+	NA	NA	NA	NA	NA
MH0084.scaffold50691_1	18176	18853	-	NA	NA	NA	NA	NA
MH0084.scaffold50691_1	21314	22708	-	COG0270	[DNA replication, recombination, and repair]	3e-06	NOT_PHAGE	Dcm, Site-specific DNA methylase .
O2.UC-13.scaffold16107_3	979	2145	-	COG3344	[DNA replication, recombination, and repair]	2e-05	NOT_PHAGE	Retron-type reverse transcriptase .
O2.UC-13.scaffold16107_3	2331	2735	-	NA	NA	NA	NA	NA
O2.UC-13.scaffold16107_3	2961	3851	-	NA	NA	NA	NA	NA
O2.UC-13.scaffold16107_3	3868	4989	-	NA	NA	NA	NA	NA
O2.UC-13.scaffold16107_3	4994	5863	-	NONE	NONE	1e-18	PHAGE	pfam05709, Sipho_tail, Phage tail protein. This family consists of several Siphovirus and other phage tail component proteins as well as some bacterial proteins of unknown function.
O2.UC-13.scaffold16107_3	5878	8913	-	COG5412	[Function unknown]	9e-17	PHAGE	Phage-related protein .
O2.UC-13.scaffold16107_3	9538	10011	-	NONE	NONE	4e-16	PHAGE	TIGR01603, maj_tail_phi13, This model describes a set of proteins that share low levels of sequence similarity but similar lengths and similar patterns of charged, hydrophobic, and Gly/Pro residues. All members (except one attributed to mouse embryo cDNA) belong to phage of Gram-positive bacteria. Several are identified as phage major tail proteins. Some members of this family have additional C-t…
O2.UC-13.scaffold16107_3	10102	10404	-	NONE	NONE	0.029	NOT_PHAGE	pfam11367, DUF3168, Protein of unknown function (DUF3168). This family of proteins has no known function.
O2.UC-13.scaffold16107_3	10421	10789	-	NONE	NONE	0.0007	PHAGE	TIGR01725, phge_HK97_gp10, This model represents an uncharacterized, highly divergent bacteriophage family. The family includes gp10 from HK022 and HK97. It appears related to TIGR01635, a phage morphogenesis family believed to be involved in tail completion.
O2.UC-13.scaffold16107_3	11171	11473	-	NA	NA	NA	NA	NA
O2.UC-13.scaffold16107_3	11491	12651	-	COG4653	[General function prediction only]	3e-14	PHAGE	Predicted phage phi-C31 gp36 major capsid-like protein .
O2.UC-13.scaffold16107_3	12656	13225	-	COG3740	[General function prediction only]	3e-13	PHAGE	Phage head maturation protease .
O2.UC-13.scaffold16107_3	13872	14246	+	NA	NA	NA	NA	NA
O2.UC-13.scaffold16107_3	13179	13799	-	NA	NA	NA	NA	NA
O2.UC-13.scaffold16107_3	14419	14658	-	COG4626	[General function prediction only]	0.039	PHAGE	Phage terminase-like protein, large subunit .
O2.UC-13.scaffold16107_3	14672	15277	-	COG4626	[General function prediction only]	4e-20	PHAGE	Phage terminase-like protein, large subunit .
O2.UC-13.scaffold16107_3	15569	16072	-	COG4626	[General function prediction only]	2e-16	PHAGE	Phage terminase-like protein, large subunit .
O2.UC-13.scaffold16107_3	16075	16428	-	NA	NA	NA	NA	NA
V1.UC-9.scaffold25059_16	521	1021	-	NA	NA	NA	NA	NA
V1.UC-9.scaffold25059_16	1024	1482	-	NONE	NONE	0.004	PHAGE	pfam11114, Minor_capsid, Minor capsid. Minor capsid is a tail accessory factor. It is a beta-sheet rich protein with a structure that spontaneously assembles into hexamers. It interacts with other tail accessory factors to assemble the P22 tail. It is also referred to as gp10.
V1.UC-9.scaffold25059_16	1482	1934	-	NA	NA	NA	NA	NA
V1.UC-9.scaffold25059_16	1888	2376	-	NONE	NONE	9e-12	PHAGE	cd08053, Yqbg, Putative Head-Tail Connector Protein Yqbg from Bacillus subtilis and similar proteins. The uncharacterized Bacillus subtilis Yqbg protein, whose gene is part of the unusual genetic element called skin, shows a similar structure to the connector proteins gp6 and gp15 from bacteriophage HK97 and SPP1, respectively. gp6 and gp15 are critical in the assembly of the connector, a special…
V1.UC-9.scaffold25059_16	2608	3564	-	NA	NA	NA	NA	NA
V1.UC-9.scaffold25059_16	3585	4178	-	NONE	NONE	0.0002	PHAGE	pfam06810, Phage_GP20, Phage minor structural protein GP20. This family consists of several phage minor structural protein GP20 sequences of around 180 residues in length. The function of this family is unknown.
V1.UC-9.scaffold25059_16	4372	5574	-	NONE	NONE	5e-21	PHAGE	pfam06152, Phage_min_cap2, Phage minor capsid protein 2. Family of related phage minor capsid proteins.
V1.UC-9.scaffold25059_16	5587	6906	-	NONE	NONE	1e-23	PHAGE	TIGR01542, A118_put_portal, This model represents a family of phage minor structural proteins. The protein is suggested to be the head-tail connector, or portal protein, on the basis of its position in the phage gene order, its presence in mature phage, its size, and its conservation across a number of complete genomes of tailed phage that lack other candidate portal proteins. Several other known…
V1.UC-9.scaffold25059_16	7024	8193	-	COG1783	[General function prediction only]	5e-08	PHAGE	XtmB, Phage terminase large subunit .
V1.UC-9.scaffold25059_16	8204	8647	-	NA	NA	NA	NA	NA
V1.UC-9.scaffold25059_16	8684	9496	-	NA	NA	NA	NA	NA
V1.UC-9.scaffold25059_16	9745	10155	-	NA	NA	NA	NA	NA
V1.UC-9.scaffold25059_16	10311	11159	-	NA	NA	NA	NA	NA
V1.UC-9.scaffold25059_16	11171	11617	-	NONE	NONE	0.02	NOT_PHAGE	TIGR02937, sigma70-ECF, Several PFAM models hit segments of these sequences including Sigma-70 region 2 (pfam04542) and Sigma-70, region 4 (pfam04545), but not always above their respective trusted cutoffs.
V1.UC-9.scaffold25059_16	11665	12963	-	COG0553	[Transcription / DNA replication, recombination, and repair]	9e-22	NOT_PHAGE	HepA, Superfamily II DNA/RNA helicases, SNF2 family .
V1.UC-9.scaffold25059_16	13623	15989	-	COG5545	[General function prediction only]	8e-62	NOT_PHAGE	Predicted P-loop ATPase and inactivated derivatives .
V1.UC-9.scaffold25059_16	16118	16504	-	NA	NA	NA	NA	NA
V1.UC-9.scaffold25059_16	16729	17049	-	NA	NA	NA	NA	NA
V1.UC-9.scaffold25059_16	17058	17447	-	NA	NA	NA	NA	NA
V1.UC-9.scaffold25059_16	17474	17809	-	NA	NA	NA	NA	NA
V1.UC-9.scaffold25059_16	18114	18437	-	NA	NA	NA	NA	NA
V1.UC-9.scaffold25059_16	18424	18747	-	NA	NA	NA	NA	NA
V1.UC-9.scaffold25059_16	18744	18944	-	NONE	NONE	0.038	NOT_PHAGE	pfam10269, Tmemb_185A, Transmembrane Fragile-X-F protein. This is a family of conserved transmembrane proteins that appear in humans to be expressed from a region upstream of the FragileXF site and to be intimately linked with the Fragile-X syndrome. Absence of TMEM185A does not necessarily lead to developmental delay, but might in combination with other, yet unknown, factors. Otherwise, the lack…
V1.UC-9.scaffold25059_16	19415	19774	-	NA	NA	NA	NA	NA
V1.UC-9.scaffold25059_16	19761	20408	-	COG1351	[Nucleotide transport and metabolism]	1e-30	NOT_PHAGE	THY1, Predicted alternative thymidylate synthase .
V1.UC-9.scaffold25059_16	20395	20706	-	NA	NA	NA	NA	NA
MH0023.scaffold27080_3	2644	3474	+	NONE	NONE	0.0007	NOT_PHAGE	PRK05035, PRK05035, electron transport complex protein RnfC; Provisional.
MH0023.scaffold27080_3	3493	3885	+	NA	NA	NA	NA	NA
MH0023.scaffold27080_3	4355	5029	+	COG3757	[Cell envelope biogenesis, outer membrane]	2e-13	NOT_PHAGE	Acm, Lyzozyme M1 (1,4-beta-N-acetylmuramidase) .
MH0023.scaffold27080_3	5053	5415	+	NA	NA	NA	NA	NA
MH0023.scaffold27080_3	5408	5734	+	NONE	NONE	0.005	PHAGE	pfam09682, Holin_LLH, Phage holin protein (Holin_LLH). This entry identifies a family of putative phage holin from a number of phage and prophage regions of Gram-positive bacteria. Like other holins, it is small (about 100 amino acids) with stretches of hydrophobic sequence and is encoded adjacent to lytic enzymes.
MH0023.scaffold27080_3	5738	7387	+	NONE	NONE	2e-09	NOT_PHAGE	pfam01391, Collagen, Collagen triple helix repeat (20 copies). Members of this family belong to the collagen superfamily. Collagens are generally extracellular structural proteins involved in formation of connective tissue structure. The alignment contains 20 copies of the G-X-Y repeat that forms a triple helix. The first position of the repeat is glycine, the second and third positions can be an…
MH0023.scaffold27080_3	8918	9316	-	NA	NA	NA	NA	NA
MH0023.scaffold27080_3	10027	10899	+	NA	NA	NA	NA	NA
O2.UC-18.scaffold2660_10	846	2363	+	NONE	NONE	4e-08	PHAGE	pfam05133, Phage_prot_Gp6, Phage portal protein, SPP1 Gp6-like. This protein forms a hole, or portal, that enables DNA passage during packaging and ejection. It also forms the junction between the phage head (capsid) and the tail proteins. During SPP1 morphogenesis, Gp6 participates in the procapsid assembly reaction. This family also includes family Phage_min_cap, pfam05126.
O2.UC-18.scaffold2660_10	2377	3012	+	NONE	NONE	0.024	PHAGE	pfam04233, Phage_Mu_F, Phage Mu protein F like protein. Members of this family are found in double-stranded DNA bacteriophages, and in some bacteria. A member of this family is required for viral head morphogenesis in bacteriophage SPP1. This family is possibly a minor head protein. This family may be related to the family TT_ORF1 (pfam02956).
O2.UC-18.scaffold2660_10	3254	3751	+	NA	NA	NA	NA	NA
O2.UC-18.scaffold2660_10	4254	5339	-	NA	NA	NA	NA	NA
O2.UC-18.scaffold2660_10	6416	7000	-	NA	NA	NA	NA	NA
O2.UC-18.scaffold2660_10	7951	8826	+	NA	NA	NA	NA	NA
O2.UC-18.scaffold2660_10	9891	10577	+	NA	NA	NA	NA	NA
O2.UC-18.scaffold2660_10	11288	13123	+	NONE	NONE	0.002	NOT_PHAGE	PRK12561, PRK12561, NAD(P)H-quinone oxidoreductase subunit 4; Provisional.
O2.UC-18.scaffold2660_10	13470	14621	+	NONE	NONE	3e-18	NOT_PHAGE	cd01651, RT_G2_intron, RT_G2_intron: Reverse transcriptases (RTs) with group II intron origin. RT transcribes DNA using RNA as template. Proteins in this subfamily are found in bacterial and mitochondrial group II introns. Their most probable ancestor was a retrotransposable element with both gag-like and pol-like genes. This subfamily of proteins appears to have captured the RT sequences from tr…
O2.UC-18.scaffold2660_10	14958	15335	+	NA	NA	NA	NA	NA
O2.UC-18.scaffold2660_10	15344	15733	+	NA	NA	NA	NA	NA
MH0066.scaffold12717_4	35	784	+	COG0305	[DNA replication, recombination, and repair]	5e-61	NOT_PHAGE	DnaB, Replicative DNA helicase .
MH0066.scaffold12717_4	1074	2669	+	NONE	NONE	1e-16	NOT_PHAGE	cd00233, VIP2, VIP2; A family of actin-ADP-ribosylating toxin. A member of the Bacillus-prodiced vegetative insecticidal proteins (VIPs) possesses high specificity against the major insect pest, corn rootworms, and belongs to a classs of binary toxins and regulators of biological pathways distinct from classical A-B toxins. A novel family of insecticidal ADP-ribosyltransferses were isolated from …
MH0066.scaffold12717_4	3141	3488	+	NA	NA	NA	NA	NA
MH0066.scaffold12717_4	3533	4981	+	NA	NA	NA	NA	NA
MH0066.scaffold12717_4	5045	7309	+	NONE	NONE	0.0004	PHAGE	PHA00430, PHA00430, tail fiber protein.
MH0066.scaffold12717_4	7306	7716	+	NA	NA	NA	NA	NA
MH0066.scaffold12717_4	7709	8032	+	NA	NA	NA	NA	NA
MH0066.scaffold12717_4	8529	9089	+	COG3926	[General function prediction only]	2e-06	NOT_PHAGE	zliS, Putative secretion activating protein .
MH0066.scaffold12717_4	9141	10448	+	COG4383	[Function unknown]	5e-27	PHAGE	Mu-like prophage protein gp29 .
MH0066.scaffold12717_4	10732	11436	+	NA	NA	NA	NA	NA
MH0066.scaffold12717_4	12317	13249	+	COG4388	[General function prediction only]	0.002	PHAGE	Mu-like prophage I protein .
MH0037.scaffold938_4	1248	2147	+	NONE	NONE	7e-06	PHAGE	PHA00430, PHA00430, tail fiber protein.
MH0037.scaffold938_4	2161	3597	+	NA	NA	NA	NA	NA
MH0037.scaffold938_4	3904	5421	+	COG3344	[DNA replication, recombination, and repair]	1e-06	NOT_PHAGE	Retron-type reverse transcriptase .
MH0037.scaffold938_4	6032	6874	+	COG0338	[DNA replication, recombination, and repair]	1e-26	NOT_PHAGE	Dam, Site-specific DNA methylase .
MH0037.scaffold938_4	7232	7852	+	COG0776	[DNA replication, recombination, and repair]	0.008	NOT_PHAGE	HimA, Bacterial nucleoid DNA-binding protein .
MH0037.scaffold938_4	8056	8760	+	COG2221	[Energy production and conversion]	2e-06	NOT_PHAGE	DsrA, Dissimilatory sulfite reductase (desulfoviridin), alpha and beta subunits .
MH0037.scaffold938_4	8905	9294	-	NA	NA	NA	NA	NA
MH0037.scaffold938_4	9253	9861	+	COG1262	[Function unknown]	6e-28	NOT_PHAGE	Uncharacterized conserved protein .
MH0037.scaffold938_4	11652	12275	-	NA	NA	NA	NA	NA
MH0037.scaffold938_4	12229	12906	+	COG0745	[Signal transduction mechanisms / Transcription]	5e-49	NOT_PHAGE	OmpR, Response regulators consisting of a CheY-like receiver domain and a winged-helix DNA-binding domain .
MH0037.scaffold938_4	12903	14192	+	COG0642	[Signal transduction mechanisms]	2e-22	NOT_PHAGE	BaeS, Signal transduction histidine kinase .
MH0037.scaffold938_4	15335	15565	-	COG1760	[Amino acid transport and metabolism]	1e-16	NOT_PHAGE	SdaA, L-serine deaminase .
V1.UC-15.scaffold4546_2	1126	3012	+	COG3250	[Carbohydrate transportand metabolism]	4e-34	NOT_PHAGE	LacZ, Beta-galactosidase/beta-glucuronidase .
V1.UC-15.scaffold4546_2	3180	3605	+	COG1247	[Cell envelopebiogenesis, outer membrane]	2e-31	NOT_PHAGE	Sortase and related acyltransferases .
V1.UC-15.scaffold4546_2	3828	4277	+	NA	NA	NA	NA	NA
V1.UC-15.scaffold4546_2	4274	5578	+	COG0766	[Cellenvelope biogenesis, outer membrane]	3e-112	NOT_PHAGE	MurA, UDP-N-acetylglucosamine enolpyruvyl transferase .
V1.UC-15.scaffold4546_2	5681	6112	+	COG0806	[Translation,ribosomal structure and biogenesis]	2e-09	NOT_PHAGE	RimM, RimM protein, required for 16S rRNA processing .
V1.UC-15.scaffold4546_2	6141	7004	+	COG0739	[Cellenvelope biogenesis, outer membrane]	8e-23	NOT_PHAGE	NlpD, Membrane proteins related to metalloendopeptidases .
V1.UC-15.scaffold4546_2	7011	8162	+	COG0743	[Lipidmetabolism]	5e-143	NOT_PHAGE	Dxr, 1-deoxy-D-xylulose 5-phosphate reductoisomerase .
V1.UC-15.scaffold4546_2	8193	9521	+	COG0750	[Cell envelope biogenesis, outer membrane]	1e-27	NOT_PHAGE	Predicted membrane-associated Zn-dependent proteases1 .
V1.UC-15.scaffold4546_2	9613	10356	-	NA	NA	NA	NA	NA
V1.UC-15.scaffold4546_2	10512	11606	-	COG0686	[Amino acid transport and metabolism]	2e-124	NOT_PHAGE	Ald, Alanine dehydrogenase .
V1.UC-15.scaffold4546_2	11703	15083	-	COG0653	[Intracellular trafficking and secretion]	1e-145	NOT_PHAGE	SecA, Preprotein translocase subunit SecA (ATPase, RNA helicase).
V1.UC-15.scaffold4546_2	15216	16802	-	COG3119	[Inorganic iontransport and metabolism]	9e-05	NOT_PHAGE	AslA, Arylsulfatase A and related enzymes .
V1.UC-15.scaffold4546_2	16799	18052	-	NA	NA	NA	NA	NA
V1.UC-15.scaffold4546_2	18760	19659	-	NONE	NONE	2e-14	NOT_PHAGE	pfam04383, KilA-N, KilA-N domain. The amino-terminal module ofthe D6R/N1R proteins defines a novel, conserved DNA-binding domain(the KilA-N domain) that is found in a wide range ofproteins of large bacterial and eukaryotic DNA viruses. The KilA-Ndomain family also includes the previously defined APSESdomain. The KilA-N and APSES domains may also share a commonfold with the nucleic acid-binding mo…
V1.UC-15.scaffold4546_2	19877	20563	-	NA	NA	NA	NA	NA
V1.UC-15.scaffold4546_2	22504	22806	+	NA	NA	NA	NA	NA
V1.UC-15.scaffold4546_2	23982	25955	+	COG0419	[DNA replication, recombination,and repair]	7e-13	NOT_PHAGE	SbcC, ATPase involved in DNA repair .
V1.UC-15.scaffold4546_2	25984	26949	+	COG3723	[DNAreplication, recombination, and repair]	3e-28	NOT_PHAGE	RecT, Recombinational DNA repair protein (RecE pathway) .
V1.UC-15.scaffold4546_2	27569	28309	+	COG1235	[General function prediction only]	2e-06	NOT_PHAGE	PhnP, Metal-dependent hydrolases of the beta-lactamase superfamilyI .
V1.UC-15.scaffold4546_2	28284	29441	+	COG0592	[DNAreplication, recombination, and repair]	1e-44	NOT_PHAGE	DnaN, DNA polymerase sliding clamp subunit (PCNA homolog) .
V1.UC-15.scaffold4546_2	29591	30202	+	NA	NA	NA	NA	NA
V1.UC-15.scaffold4546_2	30628	31746	+	NA	NA	NA	NA	NA
V1.UC-15.scaffold4546_2	31743	32447	+	NA	NA	NA	NA	NA
V1.UC-15.scaffold4546_2	32444	33211	+	COG0476	[Coenzyme metabolism]	1e-07	NOT_PHAGE	ThiF, Dinucleotide-utilizing enzymes involved in molybdopterin andthiamine biosynthesis family 2 .
V1.UC-15.scaffold4546_2	33214	34308	+	NA	NA	NA	NA	NA
V1.UC-15.scaffold4546_2	34301	35008	+	NA	NA	NA	NA	NA
V1.UC-15.scaffold4546_2	35276	36046	+	NA	NA	NA	NA	NA
V1.UC-15.scaffold4546_2	36345	37010	+	NA	NA	NA	NA	NA
V1.UC-15.scaffold4546_2	40670	41056	+	NA	NA	NA	NA	NA
V1.UC-15.scaffold4546_2	43644	45098	+	COG0591	[Amino acid transport and metabolism/ General function prediction only]	5e-21	NOT_PHAGE	PutP, Na+/proline symporter .
V1.UC-15.scaffold4546_2	45279	45884	+	NA	NA	NA	NA	NA
V1.UC-15.scaffold4546_2	45886	46662	+	NONE	NONE	0.002	NOT_PHAGE	cd01713, PAPS_reductase, This domain is found in phosphoadenosine phosphosulphate(PAPS) reductase enzymes or PAPS sulphotransferase. PAPSreductase is part of the adenine nucleotide alphahydrolases superfamily also including N type ATP PPases andATP sulphurylases. A highly modified version of the Ploop, the fingerprint peptide of mononucleotide-binding proteins, ispresent in the active site of the…
V1.UC-15.scaffold4546_2	46634	47233	+	COG1475	[Transcription]	3e-06	NOT_PHAGE	Spo0J, Predicted transcriptional regulators .
V1.UC-15.scaffold4546_2	47771	48847	+	COG3969	[Generalfunction prediction only]	2e-32	NOT_PHAGE	Predicted phosphoadenosine phosphosulfate sulfotransferase .
V1.UC-15.scaffold4546_2	49263	50744	+	COG5410	[Functionunknown]	2e-34	NOT_PHAGE	Uncharacterized protein conserved in bacteria .
V1.UC-15.scaffold4546_2	50768	52228	+	NONE	NONE	6e-20	PHAGE	pfam05133, Phage_prot_Gp6, Phage portal protein, SPP1 Gp6-like. This protein forms a hole, or portal, that enables DNA passage duringpackaging and ejection. It also forms the junction betweenthe phage head (capsid) and the tail proteins. DuringSPP1 morphogenesis, Gp6 participates in the procapsid assemblyreaction. This family also includes family Phage_min_cap, pfam05126.
V1.UC-15.scaffold4546_2	52384	53448	+	NONE	NONE	0.028	PHAGE	TIGR01641, phageSPP1_gp7, This fragment-mode HMM describes a regionof about 110 amino acids found exclusively in phage-related proteins,internally or toward the C-terminus. One member, gp7of phage SPP1, appears involved in head morphogenesis.
V1.UC-15.scaffold4546_2	55117	55920	-	COG0286	[Defense mechanisms]	1e-05	NOT_PHAGE	HsdM, Type I restriction-modification system methyltransferase subunit.
V1.UC-15.scaffold4546_2	55926	56531	-	NA	NA	NA	NA	NA
V1.UC-15.scaffold4546_2	56946	57593	+	NA	NA	NA	NA	NA
V1.UC-15.scaffold4546_2	57618	58280	+	NA	NA	NA	NA	NA
V1.UC-15.scaffold4546_2	58296	59522	+	NA	NA	NA	NA	NA
V1.UC-15.scaffold4546_2	62773	68313	+	COG3941	[General function predictiononly]	0.0007	PHAGE	Mu-like prophage protein .
V1.UC-15.scaffold4546_2	68315	69241	+	NA	NA	NA	NA	NA
MH0014.scaffold29821_4	26	646	+	COG0863	[DNA replication, recombination, and repair]	3e-12	NOT_PHAGE	DNA modification methylase .
MH0014.scaffold29821_4	1072	1758	+	COG3773	[Cell envelope biogenesis, outer membrane]	2e-12	NOT_PHAGE	SleB, Cell wall hydrolyses involved in spore germination .
MH0014.scaffold29821_4	1755	2393	+	NA	NA	NA	NA	NA
MH0014.scaffold29821_4	2462	3361	+	COG0621	[Translation, ribosomal structure and biogenesis]	0.006	NOT_PHAGE	MiaB, 2-methylthioadenine synthetase .
MH0014.scaffold29821_4	3596	4006	+	NA	NA	NA	NA	NA
MH0014.scaffold29821_4	4192	4974	+	NONE	NONE	0.008	NOT_PHAGE	PRK06039, ileS, isoleucyl-tRNA synthetase; Reviewed.
MH0014.scaffold29821_4	4971	5372	+	NA	NA	NA	NA	NA
MH0014.scaffold29821_4	5459	5827	+	NONE	NONE	0.001	NOT_PHAGE	TIGR02937, sigma70-ECF, Several PFAM models hit segments of these sequences including Sigma-70 region 2 (pfam04542) and Sigma-70, region 4 (pfam04545), but not always above their respective trusted cutoffs.
MH0014.scaffold29821_4	5984	6295	+	COG1403	[Defense mechanisms]	0.01	NOT_PHAGE	McrA, Restriction endonuclease .
MH0014.scaffold29821_4	6397	6783	+	NONE	NONE	0.01	NOT_PHAGE	PRK08293, PRK08293, 3-hydroxybutyryl-CoA dehydrogenase; Validated.
MH0014.scaffold29821_4	6783	8438	+	COG4626	[General function prediction only]	8e-94	PHAGE	Phage terminase-like protein, large subunit .
MH0014.scaffold29821_4	8566	9723	+	COG4695	[Function unknown]	2e-05	PHAGE	Phage-related protein .
MH0014.scaffold29821_4	9734	10315	+	COG3740	[General function prediction only]	5e-20	PHAGE	Phage head maturation protease .
V1.CD-12.scaffold16802_1	55	1074	-	NA	NA	NA	NA	NA
V1.CD-12.scaffold16802_1	1071	1712	-	NONE	NONE	0.043	PHAGE	cd00152, PTX, Pentraxins are plasma proteins characterized by theirpentameric discoid assembly and their Ca2+ dependent ligandbinding, such as Serum amyloid P component (SAP) and C-reactiveProtein (CRP), which are cytokine-inducible acute-phase proteinsimplicated in innate immunity. CRP binds to ligandscontaining phosphocholine, SAP binds to amyloid fibrils, DNA,chromatin, fibronectin, C4-binding…
V1.CD-12.scaffold16802_1	1731	2717	-	NA	NA	NA	NA	NA
V1.CD-12.scaffold16802_1	2710	4245	-	NA	NA	NA	NA	NA
V1.CD-12.scaffold16802_1	4247	5170	-	NA	NA	NA	NA	NA
V1.CD-12.scaffold16802_1	5579	9988	-	COG3941	[General function predictiononly]	2e-07	PHAGE	Mu-like prophage protein .
MH0068.scaffold5154_1	765	2315	-	COG3119	[Inorganic ion transport and metabolism]	4e-45	NOT_PHAGE	AslA, Arylsulfatase A and related enzymes .
MH0068.scaffold5154_1	2351	3019	-	NA	NA	NA	NA	NA
MH0068.scaffold5154_1	3078	3851	-	COG0731	[Energy production and conversion]	5e-29	NOT_PHAGE	Fe-S oxidoreductases .
MH0068.scaffold5154_1	3963	6011	-	NA	NA	NA	NA	NA
MH0068.scaffold5154_1	7115	7726	-	COG0566	[Translation, ribosomal structure and biogenesis]	2e-28	NOT_PHAGE	SpoU, rRNA methylases .
MH0068.scaffold5154_1	8134	9072	+	COG0379	[Coenzyme metabolism]	e-115	NOT_PHAGE	NadA, Quinolinate synthase .
MH0068.scaffold5154_1	9206	11230	-	NONE	NONE	e-141	NOT_PHAGE	pfam10566, Glyco_hydro_97, Glycoside hydrolase 97. This is the 97th family of glycosidases, in this case bacterial. The central part of the GH97 family protein sequences represents a typical and complete (beta/alpha)8-barrel or catalytic TIM-barrel type domain. The N- and C-terminal parts of the sequences, mainly consisting of beta-strands, most probably form two additional non-catalytic domains …
MH0068.scaffold5154_1	11277	11939	-	COG2755	[Amino acid transport and metabolism]	3e-05	NOT_PHAGE	TesA, Lysophospholipase L1 and related esterases .
MH0068.scaffold5154_1	12195	14735	-	COG1472	[Carbohydrate transport and metabolism]	2e-60	NOT_PHAGE	BglX, Beta-glucosidase-related glycosidases .
MH0068.scaffold5154_1	14757	15707	-	NONE	NONE	5e-07	NOT_PHAGE	pfam08522, DUF1735, Domain of unknown function (DUF1735). This domain of unknown function is found in a number of bacterial proteins including acylhydrolases.
MH0068.scaffold5154_1	15738	17741	-	NONE	NONE	3e-29	NOT_PHAGE	pfam07980, SusD, SusD family. This family includes several hypothetical proteins. It also contains RagB, a protein involved in signalling and SusD, an outer membrane protein involved in nutrient binding.
MH0068.scaffold5154_1	17745	20867	-	COG4206	[Coenzyme metabolism]	4e-06	NOT_PHAGE	BtuB, Outer membrane cobalamin receptor protein .
MH0068.scaffold5154_1	20897	22270	-	NONE	NONE	0.001	NOT_PHAGE	pfam01833, TIG, IPT/TIG domain. This family consists of a domain that has an immunoglobulin like fold. These domains are found in cell surface receptors such as Met and Ron as well as in intracellular transcription factors where it is involved in DNA binding. CAUTION: This family does not currently recognize a significant number of members.
MH0068.scaffold5154_1	22445	23809	-	NONE	NONE	3e-05	PHAGE	pfam02368, Big_2, Bacterial Ig-like domain (group 2). This family consists of bacterial domains with an Ig-like fold. Members of this family are found in bacterial and phage surface proteins such as intimins.
MH0068.scaffold5154_1	24248	26677	-	NONE	NONE	0.002	NOT_PHAGE	pfam03632, Glyco_hydro_65m, Glycosyl hydrolase family 65 central catalytic domain. This family of glycosyl hydrolases contains vacuolar acid trehalase and maltose phosphorylase.Maltose phosphorylase (MP) is a dimeric enzyme that catalyses the conversion of maltose and inorganic phosphate into beta-D-glucose-1-phosphate and glucose. The central domain is the catalytic domain, which binds a phospha…
MH0068.scaffold5154_1	26834	30874	+	COG0642	[Signal transduction mechanisms]	4e-32	NOT_PHAGE	BaeS, Signal transduction histidine kinase .
MH0068.scaffold5154_1	31017	33074	+	COG3345	[Carbohydrate transport and metabolism]	2e-05	NOT_PHAGE	GalA, Alpha-galactosidase .
MH0068.scaffold5154_1	33083	35029	+	NONE	NONE	5e-11	NOT_PHAGE	pfam03629, DUF303, Domain of unknown function (DUF303). Distribution of this domain seems limited to prokaryotes and viruses.
MH0068.scaffold5154_1	35054	37210	+	COG3345	[Carbohydrate transport and metabolism]	1e-86	NOT_PHAGE	GalA, Alpha-galactosidase .
MH0068.scaffold5154_1	37290	37601	-	NA	NA	NA	NA	NA
MH0068.scaffold5154_1	37560	39464	+	COG3537	[Carbohydrate transport and metabolism]	e-136	NOT_PHAGE	Putative alpha-1,2-mannosidase .
MH0068.scaffold5154_1	39598	40440	-	COG1360	[Cell motility and secretion]	4e-27	NOT_PHAGE	MotB, Flagellar motor protein .
MH0068.scaffold5154_1	40608	41204	+	NA	NA	NA	NA	NA
MH0068.scaffold5154_1	41232	42122	-	COG1284	[Function unknown]	1e-43	NOT_PHAGE	Uncharacterized conserved protein .
O2.UC-11.scaffold7355_2	389	1750	-	COG0124	[Translation, ribosomal structure and biogenesis]	3e-96	NOT_PHAGE	HisS, Histidyl-tRNA synthetase .
O2.UC-11.scaffold7355_2	1863	3137	-	COG0104	[Nucleotide transport and metabolism]	e-152	NOT_PHAGE	PurA, Adenylosuccinate synthase .
O2.UC-11.scaffold7355_2	3710	4330	-	NONE	NONE	4e-11	NOT_PHAGE	cd06561, AlkD_like, A new structural DNA glycosylase. This domain represents a new and uncharacterized structural superfamily of DNA glycosylases that form an alpha-alpha superhelix fold that are not belong to the identified five structural DNA glycosylase superfamilies (UDG, AAG/MNPG, MutM/Fpg and helix-hairpin-helix). DNA glycosylases removing alkylated base residues have been identified in all…
O2.UC-11.scaffold7355_2	4336	6297	-	NONE	NONE	7e-36	NOT_PHAGE	pfam03571, Peptidase_M49, Peptidase family M49.
O2.UC-11.scaffold7355_2	7122	8474	-	COG0037	[Cell division and chromosome partitioning]	7e-33	NOT_PHAGE	MesJ, Predicted ATPase of the PP-loop superfamily implicated in cell cycle control .
O2.UC-11.scaffold7355_2	8464	9645	-	COG1092	[General function prediction only]	2e-90	NOT_PHAGE	Predicted SAM-dependent methyltransferases .
O2.UC-11.scaffold7355_2	9638	10276	-	COG0349	[Translation, ribosomal structure and biogenesis]	2e-15	NOT_PHAGE	Rnd, Ribonuclease D .
O2.UC-11.scaffold7355_2	10380	12821	+	COG1674	[Cell division and chromosome partitioning]	e-109	NOT_PHAGE	FtsK, DNA segregation ATPase FtsK/SpoIIIE and related proteins .
O2.UC-11.scaffold7355_2	12869	13471	+	COG2834	[Cell envelope biogenesis, outer membrane]	3e-06	NOT_PHAGE	LolA, Outer membrane lipoprotein-sorting protein .
O2.UC-11.scaffold7355_2	14599	16872	+	COG3866	[Carbohydrate transport and metabolism]	4e-39	NOT_PHAGE	PelB, Pectate lyase .
O2.UC-11.scaffold7355_2	19382	20494	-	NA	NA	NA	NA	NA
O2.UC-11.scaffold7355_2	20892	21548	-	COG2932	[Transcription]	0.0003	NOT_PHAGE	Predicted transcriptional regulator .
O2.UC-11.scaffold7355_2	22241	22459	+	COG3311	[Transcription]	0.005	NOT_PHAGE	AlpA, Predicted transcriptional regulator .
O2.UC-11.scaffold7355_2	23618	24553	+	NONE	NONE	2e-11	PHAGE	TIGR01618, phage_P_loop, This model represents an uncharacterized family of proteins from a number of phage of Gram-positive bacteria. This protein contains a P-loop motif, G/A-X-X-G-X-G-K-T near its amino end. The function of this protein is unknown.
O2.UC-11.scaffold7355_2	24534	25304	+	NA	NA	NA	NA	NA
O2.UC-11.scaffold7355_2	26632	27369	+	NA	NA	NA	NA	NA
O2.UC-11.scaffold7355_2	27540	28346	+	NONE	NONE	0.013	NOT_PHAGE	pfam01275, Myelin_PLP, Myelin proteolipid protein (PLP or lipophilin).
O2.UC-11.scaffold7355_2	29022	30194	+	COG1061	[Transcription / DNA replication, recombination, and repair]	2e-50	NOT_PHAGE	SSL2, DNA or RNA helicases of superfamily II .
O2.UC-11.scaffold7355_2	30199	31074	+	NA	NA	NA	NA	NA
O2.UC-11.scaffold7355_2	31025	31660	+	COG1484	[DNA replication, recombination, and repair]	1e-05	NOT_PHAGE	DnaC, DNA replication protein .
O2.UC-11.scaffold7355_2	31974	32729	+	NA	NA	NA	NA	NA
O2.UC-11.scaffold7355_2	33170	34588	+	NA	NA	NA	NA	NA
O2.UC-11.scaffold7355_2	34926	35657	-	NA	NA	NA	NA	NA
O2.UC-11.scaffold7355_2	36964	38070	-	NA	NA	NA	NA	NA
O2.UC-11.scaffold7355_2	38503	39351	+	NA	NA	NA	NA	NA
O2.UC-11.scaffold7355_2	39404	40045	-	NA	NA	NA	NA	NA
O2.UC-11.scaffold7355_2	40852	41460	-	NA	NA	NA	NA	NA
O2.UC-11.scaffold7355_2	42896	43762	+	NONE	NONE	2e-28	NOT_PHAGE	pfam12224, Amidoligase_2, Putative amidoligase enzyme. This family of proteins are likely to act as amidoligase enzymes Protein in this family are found in conserved gene neighborhoods encoding a glutamine amidotransferase-like thiol peptidase (in proteobacteria) or an Aig2 family cyclotransferase protein (in firmicutes).
O2.UC-11.scaffold7355_2	45194	45865	+	COG0175	[Amino acid transport and metabolism / Coenzyme metabolism]	2e-09	NOT_PHAGE	CysH, 3'-phosphoadenosine 5'-phosphosulfate sulfotransferase (PAPS reductase)/FAD synthetase and related enzymes .
O2.UC-11.scaffold7355_2	45868	46608	+	COG1475	[Transcription]	0.007	NOT_PHAGE	Spo0J, Predicted transcriptional regulators .
V1.UC-21.scaffold27073_1	1992	2807	-	COG3757	[Cell envelope biogenesis, outer membrane]	2e-10	NOT_PHAGE	Acm, Lyzozyme M1 (1,4-beta-N-acetylmuramidase) .
V1.UC-21.scaffold27073_1	3471	4607	-	COG3344	[DNA replication, recombination, and repair]	3e-11	NOT_PHAGE	Retron-type reverse transcriptase .
V1.UC-21.scaffold27073_1	5462	6511	-	NA	NA	NA	NA	NA
V1.UC-21.scaffold27073_1	7030	7368	-	NA	NA	NA	NA	NA
V1.UC-21.scaffold27073_1	7882	8901	-	COG4385	[General function prediction only]	0.004	PHAGE	gpI, Bacteriophage P2-related tail formation protein .
V1.UC-21.scaffold27073_1	8894	9853	-	COG3948	[General function prediction only]	4e-24	PHAGE	Phage-related baseplate assembly protein .
V1.UC-21.scaffold27073_1	9826	10398	+	NA	NA	NA	NA	NA
V1.UC-21.scaffold27073_1	11245	12510	-	COG3500	[General function prediction only]	8e-24	PHAGE	Phage protein D .
V1.UC-21.scaffold27073_1	12741	16427	-	COG5412	[Function unknown]	8e-07	PHAGE	Phage-related protein .
V1.UC-21.scaffold27073_1	16557	16967	-	NA	NA	NA	NA	NA
V1.UC-21.scaffold27073_1	17572	18975	-	COG3497	[General function prediction only]	4e-12	PHAGE	Phage tail sheath protein FI .
V1.UC-21.scaffold27073_1	20628	21032	-	NA	NA	NA	NA	NA
V1.UC-21.scaffold27073_1	21044	22084	-	NONE	NONE	1e-63	PHAGE	pfam03864, Phage_cap_E, Phage major capsid protein E. Major capsid protein E is involved with the stabilisation of the condensed form of the DNA molecule in phage heads.
V1.UC-21.scaffold27073_1	22493	23479	-	COG0740	[Posttranslational modification, protein turnover, chaperones / Intracellular trafficking and secretion]	3e-21	NOT_PHAGE	ClpP, Protease subunit of ATP-dependent Clp proteases .
V1.UC-21.scaffold27073_1	23634	25307	-	COG5511	[General function prediction only]	6e-51	PHAGE	Bacteriophage capsid protein .
V1.UC-21.scaffold27073_1	25574	27457	-	COG5525	[General function prediction only]	e-102	PHAGE	Bacteriophage tail assembly protein .
V1.UC-21.scaffold27073_1	27450	28004	-	COG4220	[DNA replication, recombination, and repair]	0.001	PHAGE	Phage DNA packaging protein, Nu1 subunit of terminase .
V1.UC-21.scaffold27073_1	28359	28568	-	COG4974	[DNA replication, recombination, and repair]	0.004	NOT_PHAGE	XerD, Site-specific recombinase XerD .
V1.UC-21.scaffold27073_1	29180	29350	-	NONE	NONE	0.019	NOT_PHAGE	TIGR02980, SigBFG, This group of similar sigma-70 factors includes clades found in Bacilli (including the sporulation factors SigF:TIGR02885 and SigG:TIGR02850 as well as SigB:TIGR02941), and the high GC gram positive bacteria (Actinobacteria) where a variable number of them are found depending on the lineage.
V1.UC-21.scaffold27073_1	30330	31118	-	NA	NA	NA	NA	NA
V1.UC-21.scaffold27073_1	32506	33300	-	NA	NA	NA	NA	NA
V1.UC-21.scaffold27073_1	33384	33794	-	COG1694	[General function prediction only]	0.003	NOT_PHAGE	MazG, Predicted pyrophosphatase .
V1.UC-21.scaffold27073_1	34044	34475	-	COG0629	[DNA replication, recombination, and repair]	6e-11	NOT_PHAGE	Ssb, Single-stranded DNA-binding protein .
V1.UC-21.scaffold27073_1	34472	35143	-	NA	NA	NA	NA	NA
V1.UC-21.scaffold27073_1	35193	35504	-	NA	NA	NA	NA	NA
V1.UC-21.scaffold27073_1	35494	36192	-	NONE	NONE	8e-08	NOT_PHAGE	pfam10979, DUF2786, Protein of unknown function (DUF2786). This family of proteins has no known function.
V1.UC-21.scaffold27073_1	36185	36514	-	NA	NA	NA	NA	NA
V1.UC-21.scaffold27073_1	36515	37231	-	COG1484	[DNA replication, recombination, and repair]	5e-17	NOT_PHAGE	DnaC, DNA replication protein .
V1.UC-21.scaffold27073_1	37263	38294	-	NONE	NONE	1e-42	PHAGE	pfam09681, Phage_rep_org_N, N-terminal phage replisome organiser (Phage_rep_org_N). This entry represents the N-terminal domain of a small family of phage proteins. The protein contains a region of low-complexity sequence that reflects DNA direct repeats able to function as an origin of phage replication. The region is N-terminal to the low-complexity region.
V1.UC-21.scaffold27073_1	38310	39341	-	COG0206	[Cell division and chromosome partitioning]	6e-10	NOT_PHAGE	FtsZ, Cell division GTPase .
V1.UC-21.scaffold27073_1	39331	39654	-	NA	NA	NA	NA	NA
V1.UC-21.scaffold27073_1	40555	40968	-	NA	NA	NA	NA	NA
V1.UC-21.scaffold27073_1	41138	42109	-	COG1262	[Function unknown]	0.014	NOT_PHAGE	Uncharacterized conserved protein .
V1.UC-21.scaffold27073_1	42642	43514	-	NA	NA	NA	NA	NA
V1.UC-21.scaffold27073_1	45760	47766	+	COG1961	[DNA replication, recombination, and repair]	1e-28	NOT_PHAGE	PinR, Site-specific recombinases, DNA invertase Pin homologs .
MH0080.scaffold21793_1	3229	3975	+	COG0741	[Cell envelope biogenesis, outer membrane]	7e-10	NOT_PHAGE	MltE, Soluble lytic murein transglycosylase and related regulatory proteins (some contain LysM/invasin domains) .
MH0080.scaffold21793_1	4699	5508	+	COG3723	[DNA replication, recombination, and repair]	1e-15	NOT_PHAGE	RecT, Recombinational DNA repair protein (RecE pathway) .
MH0080.scaffold21793_1	5522	6319	+	NA	NA	NA	NA	NA
MH0080.scaffold21793_1	6312	7121	+	NA	NA	NA	NA	NA
MH0080.scaffold21793_1	7140	7985	+	COG1484	[DNA replication, recombination, and repair]	7e-26	NOT_PHAGE	DnaC, DNA replication protein .
MH0080.scaffold21793_1	8574	9086	+	NA	NA	NA	NA	NA
MH0080.scaffold21793_1	9362	9553	+	COG4570	[DNA replication, recombination, and repair]	7e-09	NOT_PHAGE	Rus, Holliday junction resolvase .
MH0080.scaffold21793_1	9589	10623	+	COG4942	[Cell division and chromosome partitioning]	0.004	NOT_PHAGE	Membrane-bound metallopeptidase .
MH0080.scaffold21793_1	10920	11366	+	COG5271	[General function prediction only]	0.024	NOT_PHAGE	MDN1, AAA ATPase containing von Willebrand factor type A (vWA) domain .
MH0080.scaffold21793_1	12577	13275	+	NA	NA	NA	NA	NA
MH0080.scaffold21793_1	13720	14250	+	NA	NA	NA	NA	NA
MH0080.scaffold21793_1	14348	14968	+	COG1475	[Transcription]	8e-09	NOT_PHAGE	Spo0J, Predicted transcriptional regulators .
MH0080.scaffold21793_1	14950	15561	+	COG1475	[Transcription]	5e-07	NOT_PHAGE	Spo0J, Predicted transcriptional regulators .
MH0080.scaffold21793_1	15554	17116	+	COG1475	[Transcription]	1e-06	NOT_PHAGE	Spo0J, Predicted transcriptional regulators .
MH0080.scaffold21793_1	17106	17828	+	COG2226	[Coenzyme metabolism]	3e-06	NOT_PHAGE	UbiE, Methylase involved in ubiquinone/menaquinone biosynthesis .
MH0080.scaffold21793_1	18304	19737	+	COG5362	[General function prediction only]	2e-22	PHAGE	Phage-related terminase .
MH0080.scaffold21793_1	19748	21157	+	COG4383	[Function unknown]	0.002	PHAGE	Mu-like prophage protein gp29 .
MH0080.scaffold21793_1	21161	22102	+	NONE	NONE	2e-06	PHAGE	pfam04233, Phage_Mu_F, Phage Mu protein F like protein. Members of this family are found in double-stranded DNA bacteriophages, and in some bacteria. A member of this family is required for viral head morphogenesis in bacteriophage SPP1. This family is possibly a minor head protein. This family may be related to the family TT_ORF1 (pfam02956).
MH0080.scaffold21793_1	22236	22604	+	NA	NA	NA	NA	NA
MH0080.scaffold21793_1	22802	24001	+	COG5373	[Function unknown]	0.011	NOT_PHAGE	Predicted membrane protein .
MH0080.scaffold21793_1	24050	24406	+	NA	NA	NA	NA	NA
MH0043.scaffold13467_4	6	782	+	NA	NA	NA	NA	NA
MH0043.scaffold13467_4	785	1696	+	NONE	NONE	2e-07	NOT_PHAGE	pfam04404, ERF, ERF superfamily. The DNA single-strand annealing proteins (SSAPs), such as RecT, Red-beta, ERF and Rad52, function in RecA-dependent and RecA-independent DNA recombination pathways. This family includes proteins related to ERF.
MH0043.scaffold13467_4	1812	2729	+	COG5377	[DNA replication, recombination, and repair]	0.0004	PHAGE	Phage-related protein, predicted endonuclease .
MH0043.scaffold13467_4	2895	3398	+	NA	NA	NA	NA	NA
MH0043.scaffold13467_4	3395	4036	+	NA	NA	NA	NA	NA
MH0043.scaffold13467_4	4280	4432	+	NONE	NONE	0.0002	NOT_PHAGE	pfam07659, DUF1599, Domain of Unknown Function (DUF1599).
MH0043.scaffold13467_4	4419	4754	+	COG1694	[General function prediction only]	9e-05	NOT_PHAGE	MazG, Predicted pyrophosphatase .
MH0043.scaffold13467_4	4747	5343	+	COG3481	[General function prediction only]	0.007	NOT_PHAGE	Predicted HD-superfamily hydrolase .
MH0043.scaffold13467_4	5347	5970	+	COG1351	[Nucleotide transport and metabolism]	4e-26	NOT_PHAGE	THY1, Predicted alternative thymidylate synthase .
MH0043.scaffold13467_4	5967	6317	+	NONE	NONE	0.011	NOT_PHAGE	pfam00577, Usher, Fimbrial Usher protein. This protein is involved in biogenesis of gram negative bacterial pili.
MH0043.scaffold13467_4	7071	7856	+	COG4983	[Function unknown]	3e-18	NOT_PHAGE	Uncharacterized conserved protein .
MH0043.scaffold13467_4	8075	8215	+	NONE	NONE	0.017	NOT_PHAGE	pfam02452, PemK, PemK-like protein. PemK is a growth inhibitor in E. coli known to bind to the promoter region of the Pem operon, auto-regulating synthesis. This Pfam family consists of the PemK protein in addition to ChpA, ChpB and other PemK-like proteins.
MH0043.scaffold13467_4	8469	9908	+	COG3378	[General function prediction only]	2e-60	NOT_PHAGE	Predicted ATPase .
MH0043.scaffold13467_4	10861	11061	+	COG1241	[DNA replication, recombination, and repair]	0.004	NOT_PHAGE	MCM2, Predicted ATPase involved in replication control, Cdc46/Mcm family .
MH0043.scaffold13467_4	11229	11882	+	COG0190	[Coenzyme metabolism]	5e-09	NOT_PHAGE	FolD, 5,10-methylene-tetrahydrofolate dehydrogenase/Methenyl tetrahydrofolate cyclohydrolase .
MH0043.scaffold13467_4	12229	12537	+	NA	NA	NA	NA	NA
MH0043.scaffold13467_4	15749	16393	+	NA	NA	NA	NA	NA
MH0043.scaffold13467_4	17877	18383	-	NA	NA	NA	NA	NA
MH0043.scaffold13467_4	18405	19622	+	NONE	NONE	1e-09	PHAGE	TIGR01630, psiM2_ORF9, This model represents the C-terminal region of a set of phage proteins typically about 400-500 amino acids in length, although some members are considerably shorter. An article on Methanobacterium phage Psi-M2 (PMID:9791169) calls the member from that phage, ORF9, a putative large terminase subunit, and ORF8 a candidate terminase small subunit. Most proteins in this family …
MH0043.scaffold13467_4	19615	21003	-	NA	NA	NA	NA	NA
MH0083.scaffold59817_1	3234	5654	-	NA	NA	NA	NA	NA
MH0083.scaffold59817_1	6497	8833	-	NA	NA	NA	NA	NA
MH0083.scaffold59817_1	8836	9696	-	NA	NA	NA	NA	NA
MH0083.scaffold59817_1	9773	11815	-	NA	NA	NA	NA	NA
MH0083.scaffold59817_1	11818	12384	-	NONE	NONE	0.013	NOT_PHAGE	pfam03097, BRO1, BRO1-like domain. This domain is found in a number proteins including Rhophilin and BRO1. It is known to have a role in endosomal targeting. ESCRT-III subunit Snf7 binds to a conserved hydrophobic patch in the BRO1 domain that is required for protein complex formation and for the protein-sorting function of BRO1.
MH0083.scaffold59817_1	12381	15776	-	COG1196	[Cell division and chromosome partitioning]	1e-10	NOT_PHAGE	Smc, Chromosome segregation ATPases .
MH0083.scaffold59817_1	16742	17614	-	COG3645	[Function unknown]	5e-09	PHAGE	Uncharacterized phage-encoded protein .
MH0083.scaffold59817_1	19743	20585	-	NA	NA	NA	NA	NA
MH0083.scaffold59817_1	21855	23168	-	NONE	NONE	3e-30	PHAGE	pfam05065, Phage_capsid, Phage capsid family. Family of bacteriophage hypothetical proteins and capsid proteins.
MH0083.scaffold59817_1	23165	23752	-	COG3740	[General function prediction only]	1e-07	PHAGE	Phage head maturation protease .
MH0083.scaffold59817_1	23853	25214	-	NONE	NONE	3e-09	PHAGE	pfam04860, Phage_portal, Phage portal protein. Bacteriophage portal proteins form a dodecamer and is located at a five-fold vertex of the viral capsid. The portal complex forms a channel through which the viral DNA is packaged into the capsid, and exits during infection. The portal protein is though to rotate during DNA packaging. Portal proteins from different phage show little sequence homology…
MH0083.scaffold59817_1	25512	27521	-	COG1783	[General function prediction only]	2e-15	PHAGE	XtmB, Phage terminase large subunit .
V1.CD-3.scaffold42804_3	1413	1712	-	NA	NA	NA	NA	NA
V1.CD-3.scaffold42804_3	1743	2144	-	NA	NA	NA	NA	NA
V1.CD-3.scaffold42804_3	2416	3783	-	NA	NA	NA	NA	NA
V1.CD-3.scaffold42804_3	3788	4375	-	NA	NA	NA	NA	NA
V1.CD-3.scaffold42804_3	4909	6423	-	NONE	NONE	0.033	PHAGE	pfam07484, Collar, Phage Tail Collar Domain. This region is occasionally found in conjunction with pfam03335. Most of the family appear to be phage tail proteins; however some appear to be involved in other processes. For instance rhiB from Rhizobium leguminosarum may be involved in plant-microbe interactions. A related protein MrpB is involved in the pathogenicity of Microcystis aeruginosa. The …
V1.CD-3.scaffold42804_3	6425	6895	-	NA	NA	NA	NA	NA
V1.CD-3.scaffold42804_3	7732	8298	+	NA	NA	NA	NA	NA
V1.CD-3.scaffold42804_3	6901	7452	-	NA	NA	NA	NA	NA
V1.CD-3.scaffold42804_3	8379	8759	-	NA	NA	NA	NA	NA
V1.CD-3.scaffold42804_3	8768	11041	-	COG5412	[Function unknown]	2e-07	PHAGE	Phage-related protein .
V1.CD-3.scaffold42804_3	11054	11536	-	NA	NA	NA	NA	NA
V1.CD-3.scaffold42804_3	11608	12027	-	NA	NA	NA	NA	NA
V1.CD-3.scaffold42804_3	12041	12439	-	NA	NA	NA	NA	NA
V1.CD-3.scaffold42804_3	12577	12969	-	NA	NA	NA	NA	NA
V1.CD-3.scaffold42804_3	13022	13417	-	NONE	NONE	0.0006	PHAGE	pfam11114, Minor_capsid, Minor capsid. Minor capsid is a tail accessory factor. It is a beta-sheet rich protein with a structure that spontaneously assembles into hexamers. It interacts with other tail accessory factors to assemble the P22 tail. It is also referred to as gp10.
V1.CD-3.scaffold42804_3	13432	13887	-	NA	NA	NA	NA	NA
V1.CD-3.scaffold42804_3	14461	15258	-	NA	NA	NA	NA	NA
V1.CD-3.scaffold42804_3	15330	15902	-	NONE	NONE	0.013	NOT_PHAGE	cd04299, GT1_Glycogen_Phosphorylase_like, This family is most closely related to the oligosaccharide phosphorylase domain family and other unidentified sequences. Oligosaccharide phosphorylase catalyzes the breakdown of oligosaccharides into glucose-1-phosphate units. They are important allosteric enzymes in carbohydrate metabolism. The members of this family are found in bacteria and Archaea..
V1.CD-3.scaffold42804_3	16009	17199	-	NONE	NONE	1e-30	PHAGE	pfam06152, Phage_min_cap2, Phage minor capsid protein 2. Family of related phage minor capsid proteins.
V1.CD-3.scaffold42804_3	17168	17566	-	NA	NA	NA	NA	NA
V1.CD-3.scaffold42804_3	17870	18961	+	NA	NA	NA	NA	NA
V1.CD-3.scaffold42804_3	17576	17818	-	NONE	NONE	0.004	PHAGE	TIGR01542, A118_put_portal, This model represents a family of phage minor structural proteins. The protein is suggested to be the head-tail connector, or portal protein, on the basis of its position in the phage gene order, its presence in mature phage, its size, and its conservation across a number of complete genomes of tailed phage that lack other candidate portal proteins. Several other known…
MH0086.scaffold36990_8	1083	2378	+	COG1783	[General function prediction only]	0.037	PHAGE	XtmB, Phage terminase large subunit .
MH0086.scaffold36990_8	2407	3849	+	NONE	NONE	2e-09	PHAGE	pfam05133, Phage_prot_Gp6, Phage portal protein, SPP1 Gp6-like. This protein forms a hole, or portal, that enables DNA passage during packaging and ejection. It also forms the junction between the phage head (capsid) and the tail proteins. During SPP1 morphogenesis, Gp6 participates in the procapsid assembly reaction. This family also includes family Phage_min_cap, pfam05126.
MH0086.scaffold36990_8	3833	5269	+	NONE	NONE	2e-54	PHAGE	pfam06152, Phage_min_cap2, Phage minor capsid protein 2. Family of related phage minor capsid proteins.
MH0086.scaffold36990_8	5565	6134	+	COG5271	[General function prediction only]	0.004	NOT_PHAGE	MDN1, AAA ATPase containing von Willebrand factor type A (vWA) domain .
MH0086.scaffold36990_8	6153	7226	+	NA	NA	NA	NA	NA
MH0086.scaffold36990_8	7966	8304	+	NA	NA	NA	NA	NA
MH0086.scaffold36990_8	9523	9849	+	NA	NA	NA	NA	NA
MH0086.scaffold36990_8	10207	13029	+	COG5412	[Function unknown]	6e-07	PHAGE	Phage-related protein .
MH0086.scaffold36990_8	13406	14491	+	NA	NA	NA	NA	NA
MH0086.scaffold36990_8	14882	17017	+	COG3064	[Cell envelope biogenesis, outer membrane]	2e-06	NOT_PHAGE	TolA, Membrane protein involved in colicin uptake .
MH0086.scaffold36990_8	17162	17308	+	NONE	NONE	0.0005	PHAGE	pfam09693, Phage_XkdX, Phage uncharacterized protein (Phage_XkdX). This entry identifies a family of small (about 50 amino acid) phage proteins, found in at least 12 different phage and prophage regions of Gram-positive bacteria. In a number of these phage, the gene for this protein is found near the holin and endolysin genes.
MH0059.scaffold98_1	130	990	-	NONE	NONE	4e-11	PHAGE	pfam11195, DUF2829, Protein of unknown function (DUF2829). This is a uncharacterized family of proteins found in bacteria and bacteriphages.
MH0059.scaffold98_1	987	1676	-	NA	NA	NA	NA	NA
MH0059.scaffold98_1	3011	3697	-	NA	NA	NA	NA	NA
MH0059.scaffold98_1	4971	6233	-	COG1403	[Defense mechanisms]	0.001	NOT_PHAGE	McrA, Restriction endonuclease .
MH0059.scaffold98_1	7695	8387	-	NONE	NONE	1e-07	PHAGE	TIGR01453, grpIintron_endo, This model represents one subfamily of endonucleases containing the endo/excinuclease amino terminal domain, pfam01541 at its amino end. A distinct subfamily includes excinuclease abc subunit c (uvrC). Members of pfam01541 are often termed GIY-YIG endonucleases after conserved motifs near the amino end. This subfamily in this HMM is found in open reading frames of grou…
MH0059.scaffold98_1	8978	9955	-	NA	NA	NA	NA	NA
MH0059.scaffold98_1	10078	11292	-	COG0675	[DNA replication, recombination, and repair]	9e-19	NOT_PHAGE	Transposase and inactivated derivatives .
MH0059.scaffold98_1	12982	14448	-	COG3378	[General function prediction only]	6e-28	NOT_PHAGE	Predicted ATPase .
MH0059.scaffold98_1	14435	15472	-	NA	NA	NA	NA	NA
MH0001.scaffold17887_2	1389	1946	+	COG4636	[Function unknown]	3e-14	NOT_PHAGE	Uma2, Uncharacterized protein conserved in cyanobacteria .
MH0001.scaffold17887_2	2614	4113	-	NA	NA	NA	NA	NA
MH0001.scaffold17887_2	4331	6736	-	NA	NA	NA	NA	NA
MH0001.scaffold17887_2	6981	8321	-	NONE	NONE	0.002	PHAGE	pfam02368, Big_2, Bacterial Ig-like domain (group 2). This family consists of bacterial domains with an Ig-like fold. Members of this family are found in bacterial and phage surface proteins such as intimins.
MH0001.scaffold17887_2	8358	9380	-	NONE	NONE	0.025	NOT_PHAGE	pfam07656, KWG, KWG Leptospira. This motif occurs in multiple copies in Leptospira interrogans proteins.
MH0001.scaffold17887_2	9418	13410	-	COG5492	[Cell motility and secretion]	1e-05	NOT_PHAGE	Bacterial surface proteins containing Ig-like domains .
MH0001.scaffold17887_2	13539	14579	-	NA	NA	NA	NA	NA
MH0001.scaffold17887_2	14609	15625	-	NA	NA	NA	NA	NA
MH0001.scaffold17887_2	15638	17071	-	COG1305	[Amino acid transport and metabolism]	0.016	NOT_PHAGE	Transglutaminase-like enzymes, putative cysteine proteases .
MH0001.scaffold17887_2	17596	18663	-	NONE	NONE	0.006	NOT_PHAGE	PRK10863, PRK10863, anti-RNA polymerase sigma factor SigE; Provisional.
MH0001.scaffold17887_2	18664	20259	-	COG1696	[Cell envelope biogenesis, outer membrane]	5e-43	NOT_PHAGE	DltB, Predicted membrane protein involved in D-alanine export .
MH0001.scaffold17887_2	20513	22048	-	COG1020	[Secondary metabolites biosynthesis, transport, and catabolism]	3e-70	NOT_PHAGE	EntF, Non-ribosomal peptide synthetase modules and related proteins .
MH0001.scaffold17887_2	22048	22770	-	COG1794	[Cell envelope biogenesis, outer membrane]	3e-39	NOT_PHAGE	RacX, Aspartate racemase .
MH0001.scaffold17887_2	22880	24346	-	NA	NA	NA	NA	NA
MH0006.scaffold134601_2	318	704	+	NA	NA	NA	NA	NA
MH0006.scaffold134601_2	722	1435	+	NA	NA	NA	NA	NA
MH0006.scaffold134601_2	1404	2024	+	NA	NA	NA	NA	NA
MH0006.scaffold134601_2	2291	2596	+	NA	NA	NA	NA	NA
MH0006.scaffold134601_2	2700	2945	+	NONE	NONE	0.039	NOT_PHAGE	cd00085, HNHc, HNH nucleases; HNH endonuclease signature which is found in viral, prokaryotic, and eukaryotic proteins. The alignment includes members of the large group of homing endonucleases, yeast intron 1 protein, MutS, as well as bacterial colicins, pyocins, and anaredoxins..
MH0006.scaffold134601_2	3363	3800	+	NONE	NONE	0.001	PHAGE	pfam07374, DUF1492, Protein of unknown function (DUF1492). This family consists of several hypothetical, highly conserved Streptococcal and related phage proteins of around 100 residues in length. The function of this family is unknown. It appears to be distantly related to pfam08281.
MH0006.scaffold134601_2	4285	5877	+	COG1783	[General function prediction only]	3e-45	PHAGE	XtmB, Phage terminase large subunit .
MH0006.scaffold134601_2	5889	6203	+	NA	NA	NA	NA	NA
MH0006.scaffold134601_2	6200	7552	+	NONE	NONE	2e-16	PHAGE	TIGR01542, A118_put_portal, This model represents a family of phage minor structural proteins. The protein is suggested to be the head-tail connector, or portal protein, on the basis of its position in the phage gene order, its presence in mature phage, its size, and its conservation across a number of complete genomes of tailed phage that lack other candidate portal proteins. Several other known…
MH0006.scaffold134601_2	7549	9390	+	NONE	NONE	2e-31	PHAGE	pfam06152, Phage_min_cap2, Phage minor capsid protein 2. Family of related phage minor capsid proteins.
MH0006.scaffold134601_2	9876	10466	+	NA	NA	NA	NA	NA
MH0006.scaffold134601_2	10575	11375	+	NA	NA	NA	NA	NA
MH0006.scaffold134601_2	11393	11851	+	NONE	NONE	7e-10	PHAGE	cd08053, Yqbg, Putative Head-Tail Connector Protein Yqbg from Bacillus subtilis and similar proteins. The uncharacterized Bacillus subtilis Yqbg protein, whose gene is part of the unusual genetic element called skin, shows a similar structure to the connector proteins gp6 and gp15 from bacteriophage HK97 and SPP1, respectively. gp6 and gp15 are critical in the assembly of the connector, a special…
MH0006.scaffold134601_2	11851	12243	+	NA	NA	NA	NA	NA
MH0006.scaffold134601_2	12240	12671	+	NONE	NONE	0.002	PHAGE	pfam11114, Minor_capsid, Minor capsid. Minor capsid is a tail accessory factor. It is a beta-sheet rich protein with a structure that spontaneously assembles into hexamers. It interacts with other tail accessory factors to assemble the P22 tail. It is also referred to as gp10.
MH0006.scaffold134601_2	12703	13134	+	NA	NA	NA	NA	NA
MH0006.scaffold134601_2	13141	13665	+	NA	NA	NA	NA	NA
MH0006.scaffold134601_2	13678	14127	+	NA	NA	NA	NA	NA
MH0006.scaffold320135_1	725	2071	-	COG0367	[Amino acid transport and metabolism]	3e-42	NOT_PHAGE	AsnB, Asparagine synthase (glutamine-hydrolyzing) .
MH0006.scaffold320135_1	2339	3073	-	COG0207	[Nucleotide transport and metabolism]	2e-13	NOT_PHAGE	ThyA, Thymidylate synthase .
MH0006.scaffold320135_1	3105	3698	-	NA	NA	NA	NA	NA
MH0006.scaffold320135_1	3695	4141	-	NA	NA	NA	NA	NA
MH0006.scaffold320135_1	4246	4863	-	NA	NA	NA	NA	NA
MH0006.scaffold320135_1	5197	5526	-	NA	NA	NA	NA	NA
MH0006.scaffold320135_1	5577	6980	-	COG0553	[Transcription / DNA replication, recombination, and repair]	9e-24	NOT_PHAGE	HepA, Superfamily II DNA/RNA helicases, SNF2 family .
MH0006.scaffold320135_1	7830	10241	-	COG5545	[General function prediction only]	4e-62	NOT_PHAGE	Predicted P-loop ATPase and inactivated derivatives .
MH0006.scaffold320135_1	10241	12283	-	COG0749	[DNA replication, recombination, and repair]	2e-24	NOT_PHAGE	PolA, DNA polymerase I - 3'-5' exonuclease and polymerase domains .
MH0006.scaffold320135_1	12285	12824	-	NONE	NONE	7e-60	PHAGE	pfam10991, DUF2815, Protein of unknown function (DUF2815). This is a phage related family of proteins with unknown function.
MH0006.scaffold320135_1	12837	14018	-	NONE	NONE	e-119	NOT_PHAGE	pfam10926, DUF2800, Protein of unknown function (DUF2800). This is a family of uncharacterized proteins found in bacteria and viruses. Some members of this family are annotated as being Phi APSE P51-like proteins.
MH0006.scaffold320135_1	14018	14419	-	NONE	NONE	0.014	NOT_PHAGE	PRK09752, PRK09752, adhesin; Provisional.
MH0006.scaffold320135_1	14899	15324	-	NONE	NONE	0.019	NOT_PHAGE	PRK10861, PRK10861, lsignal peptidase I; Provisional.
MH0006.scaffold320135_1	15688	16056	-	NA	NA	NA	NA	NA
MH0006.scaffold320135_1	16397	16783	-	NA	NA	NA	NA	NA
MH0006.scaffold212103_1	1947	2681	-	NA	NA	NA	NA	NA
MH0006.scaffold212103_1	2848	4746	-	COG4379	[General function prediction only]	0.009	PHAGE	Mu-like prophage tail protein gpP .
MH0006.scaffold212103_1	4747	5448	-	NONE	NONE	1e-05	PHAGE	pfam05709, Sipho_tail, Phage tail protein. This family consists of several Siphovirus and other phage tail component proteins as well as some bacterial proteins of unknown function.
MH0006.scaffold212103_1	5445	7583	-	COG5412	[Function unknown]	1e-17	PHAGE	Phage-related protein .
MH0006.scaffold212103_1	7888	8274	-	NA	NA	NA	NA	NA
MH0006.scaffold212103_1	8487	9074	-	NA	NA	NA	NA	NA
MH0006.scaffold212103_1	9071	9457	-	NA	NA	NA	NA	NA
MH0006.scaffold212103_1	9454	9918	-	NA	NA	NA	NA	NA
MH0006.scaffold212103_1	9935	10291	-	NONE	NONE	0.043	PHAGE	pfam05521, Phage_H_T_join, Phage head-tail joining protein.
MH0006.scaffold212103_1	10288	10839	-	NA	NA	NA	NA	NA
MH0006.scaffold212103_1	10861	11871	-	NA	NA	NA	NA	NA
MH0006.scaffold212103_1	11952	12578	-	COG7	NONE	0.006	NOT_PHAGE	pfam10191, COG7, Golgi complex component 7 (COG7). COG7 is a component of the conserved oligomeric Golgi complex which is required for normal Golgi morphology and localisation. Mutation in COG7 causes a congenital disorder of glycosylation.
MH0069.scaffold16323_9	1783	2412	+	NONE	NONE	3e-31	PHAGE	pfam06147, DUF968, Protein of unknown function (DUF968). Family of uncharacterized prophage proteins that are also found in bacteria and eukaryotes.
MH0069.scaffold16323_9	2463	3236	+	NA	NA	NA	NA	NA
MH0069.scaffold16323_9	3196	3966	+	COG1484	[DNA replication, recombination, and repair]	1e-18	NOT_PHAGE	DnaC, DNA replication protein .
MH0069.scaffold16323_9	4323	5102	+	NA	NA	NA	NA	NA
MH0069.scaffold16323_9	6486	7211	+	NA	NA	NA	NA	NA
MH0069.scaffold16323_9	7379	8593	+	NA	NA	NA	NA	NA
MH0069.scaffold16323_9	8813	11332	+	COG0553	[Transcription / DNA replication, recombination, and repair]	2e-05	NOT_PHAGE	HepA, Superfamily II DNA/RNA helicases, SNF2 family .
MH0037.scaffold33786_1	142	369	+	COG0270	[DNA replication, recombination, and repair]	6e-07	NOT_PHAGE	Dcm, Site-specific DNA methylase .
MH0037.scaffold33786_1	1513	2301	+	COG4422	[Function unknown]	2e-24	PHAGE	Bacteriophage protein gp37 .
MH0037.scaffold33786_1	2977	4386	+	COG1961	[DNA replication, recombination, and repair]	2e-20	NOT_PHAGE	PinR, Site-specific recombinases, DNA invertase Pin homologs .
MH0037.scaffold33786_1	5542	6336	+	NA	NA	NA	NA	NA
MH0037.scaffold33786_1	6892	7524	+	NA	NA	NA	NA	NA
MH0037.scaffold33786_1	8074	9078	-	NONE	NONE	0.029	NOT_PHAGE	pfam07907, YibE_F, YibE/F-like protein. The sequences featured in this family are similar to two proteins expressed by Lactococcus lactis, YibE and YibF. Most of the members of this family are annotated as being putative membrane proteins, and in fact the sequences contain a high proportion of hydrophobic residues.
MH0037.scaffold33786_1	11304	11606	+	NA	NA	NA	NA	NA
MH0037.scaffold33786_1	11886	12458	+	NA	NA	NA	NA	NA
MH0037.scaffold33786_1	13114	13785	+	NA	NA	NA	NA	NA
MH0037.scaffold33786_1	13986	14531	+	COG1403	[Defense mechanisms]	0.004	NOT_PHAGE	McrA, Restriction endonuclease .
MH0053.scaffold90432_7	661	1920	+	COG1783	[General function prediction only]	3e-49	PHAGE	XtmB, Phage terminase large subunit .
MH0053.scaffold90432_7	2242	3687	+	NONE	NONE	8e-35	PHAGE	pfam05133, Phage_prot_Gp6, Phage portal protein, SPP1 Gp6-like. This protein forms a hole, or portal, that enables DNA passage during packaging and ejection. It also forms the junction between the phage head (capsid) and the tail proteins. During SPP1 morphogenesis, Gp6 participates in the procapsid assembly reaction. This family also includes family Phage_min_cap, pfam05126.
MH0053.scaffold90432_7	3680	5083	+	COG2369	[Function unknown]	1e-05	PHAGE	Uncharacterized protein, homolog of phage Mu protein gp30 .
MH0053.scaffold90432_7	5734	6351	+	NONE	NONE	0.01	PHAGE	pfam06810, Phage_GP20, Phage minor structural protein GP20. This family consists of several phage minor structural protein GP20 sequences of around 180 residues in length. The function of this family is unknown.
MH0053.scaffold90432_7	6367	7365	+	NA	NA	NA	NA	NA
MH0053.scaffold90432_7	10608	12875	+	COG5412	[Function unknown]	2e-24	PHAGE	Phage-related protein .
MH0053.scaffold90432_7	12868	13686	+	NA	NA	NA	NA	NA
MH0053.scaffold90432_7	13677	14666	+	NA	NA	NA	NA	NA
MH0053.scaffold90432_7	14663	15487	+	NA	NA	NA	NA	NA
MH0053.scaffold90432_7	16473	17267	+	COG0860	[Cell envelope biogenesis, outer membrane]	1e-19	NOT_PHAGE	AmiC, N-acetylmuramoyl-L-alanine amidase .
MH0058.scaffold19676_1	251	1363	-	NA	NA	NA	NA	NA
MH0058.scaffold19676_1	1420	2367	-	NONE	NONE	0.044	NOT_PHAGE	pfam07926, TPR_MLP1_2, TPR/MLP1/MLP2-like protein. The sequences featured in this family are similar to a region of human TPR protein and to yeast myosin-like proteins 1 (MLP1) and 2 (MLP2). These proteins share a number of features; for example, they all have coiled-coil regions and all three are associated with nuclear pores. TPR is thought to be a component of nuclear pore complex- attached in…
MH0058.scaffold19676_1	2685	2939	-	NONE	NONE	0.003	NOT_PHAGE	PRK09138, PRK09138, DNA topoisomerase I; Validated.
MH0058.scaffold19676_1	3703	5523	-	NA	NA	NA	NA	NA
MH0058.scaffold19676_1	5583	6230	-	NA	NA	NA	NA	NA
MH0058.scaffold19676_1	6362	7936	-	COG5410	[Function unknown]	7e-19	NOT_PHAGE	Uncharacterized protein conserved in bacteria .
MH0058.scaffold19676_1	8130	8831	-	NA	NA	NA	NA	NA
MH0058.scaffold19676_1	10206	11252	-	NA	NA	NA	NA	NA
MH0058.scaffold19676_1	11656	12219	+	NA	NA	NA	NA	NA
V1.UC-10.scaffold8015_1	3179	3631	-	COG0791	[Cell envelope biogenesis, outer membrane]	2e-06	NOT_PHAGE	Spr, Cell wall-associated hydrolases (invasion-associated proteins) .
V1.UC-10.scaffold8015_1	4778	8617	-	COG3064	[Cell envelope biogenesis, outer membrane]	0.044	NOT_PHAGE	TolA, Membrane protein involved in colicin uptake .
V1.UC-10.scaffold8015_1	10210	10500	-	NONE	NONE	0.025	PHAGE	pfam04883, DUF646, Bacteriophage protein of unknown function (DUF646). This family of proteins is found in the caudovirales. It may be a tail component.
V1.UC-10.scaffold8015_1	11536	12090	-	NONE	NONE	3e-34	PHAGE	TIGR01554, major_cap_HK97, This model family represents the major capsid protein component of the heads (capsids) of bacteriophage HK97, phi-105, P27, and related phage. This model represents one of several analogous families lacking detectable sequence similarity. The gene encoding this component is typically located in an operon encoding the small and large terminase subunits, the portal protei…
V1.UC-10.scaffold8015_1	12077	12700	+	NA	NA	NA	NA	NA
V1.UC-10.scaffold8015_1	12722	13351	-	COG3740	[General function prediction only]	1e-25	PHAGE	Phage head maturation protease .
V1.UC-10.scaffold8015_1	13305	14576	-	COG4695	[Function unknown]	2e-52	PHAGE	Phage-related protein .
V1.UC-10.scaffold8015_1	14756	16477	-	COG4626	[General function prediction only]	2e-87	PHAGE	Phage terminase-like protein, large subunit .
O2.UC-13.scaffold48461_3	441	1097	-	NONE	NONE	6e-27	PHAGE	pfam06147, DUF968, Protein of unknown function (DUF968). Family of uncharacterized prophage proteins that are also found in bacteria and eukaryotes.
O2.UC-13.scaffold48461_3	1072	1746	-	COG1235	[General function prediction only]	8e-05	NOT_PHAGE	PhnP, Metal-dependent hydrolases of the beta-lactamase superfamily I .
O2.UC-13.scaffold48461_3	2088	2303	-	COG3723	[DNA replication, recombination, and repair]	9e-09	NOT_PHAGE	RecT, Recombinational DNA repair protein (RecE pathway) .
O2.UC-13.scaffold48461_3	2665	3528	-	NONE	NONE	9e-07	PHAGE	pfam07083, DUF1351, Protein of unknown function (DUF1351). This family consists of several bacterial and phage proteins of around 230 residues in length. The function of this family is unknown.
O2.UC-13.scaffold48461_3	4231	5280	-	NA	NA	NA	NA	NA
O2.UC-13.scaffold48461_3	8321	9622	+	COG2433	[Function unknown]	0.0003	NOT_PHAGE	Uncharacterized conserved protein .
O2.UC-13.scaffold48461_3	10238	11104	+	NA	NA	NA	NA	NA
O2.UC-13.scaffold48461_3	11136	12020	-	NA	NA	NA	NA	NA
O2.UC-13.scaffold48461_3	12521	14116	+	COG1961	[DNA replication, recombination, and repair]	8e-09	NOT_PHAGE	PinR, Site-specific recombinases, DNA invertase Pin homologs .
O2.UC-13.scaffold48461_3	14178	14489	-	NA	NA	NA	NA	NA
MH0075.scaffold4078_1	2838	4850	+	NA	NA	NA	NA	NA
MH0075.scaffold4078_1	4889	5761	+	COG2842	[General function prediction only]	2e-07	NOT_PHAGE	Uncharacterized ATPase, putative transposase .
MH0075.scaffold4078_1	5989	6609	+	COG1066	[Posttranslational modification, protein turnover, chaperones]	1e-06	NOT_PHAGE	Sms, Predicted ATP-dependent serine protease .
MH0075.scaffold4078_1	8103	8768	+	NONE	NONE	2e-05	NOT_PHAGE	pfam11363, DUF3164, Protein of unknown function (DUF3164). This family of proteins has no known function.
MH0075.scaffold4078_1	9225	9542	-	NA	NA	NA	NA	NA
MH0075.scaffold4078_1	9815	10234	+	NA	NA	NA	NA	NA
MH0075.scaffold4078_1	10319	10948	-	NA	NA	NA	NA	NA
MH0075.scaffold4078_1	11155	11793	-	COG0207	[Nucleotide transport and metabolism]	2e-13	NOT_PHAGE	ThyA, Thymidylate synthase .
MH0075.scaffold4078_1	12294	12695	-	NA	NA	NA	NA	NA
MH0075.scaffold4078_1	12779	14032	-	COG3344	[DNA replication, recombination, and repair]	3e-05	NOT_PHAGE	Retron-type reverse transcriptase .
MH0067.scaffold17093_3	62	5008	+	NA	NA	NA	NA	NA
MH0067.scaffold17093_3	5673	7061	+	NONE	NONE	3e-17	NOT_PHAGE	cd01651, RT_G2_intron, RT_G2_intron: Reverse transcriptases (RTs) with group II intron origin. RT transcribes DNA using RNA as template. Proteins in this subfamily are found in bacterial and mitochondrial group II introns. Their most probable ancestor was a retrotransposable element with both gag-like and pol-like genes. This subfamily of proteins appears to have captured the RT sequences from tr…
MH0067.scaffold17093_3	8057	8695	+	COG0207	[Nucleotide transport and metabolism]	2e-12	NOT_PHAGE	ThyA, Thymidylate synthase .
MH0067.scaffold17093_3	8692	9552	+	NA	NA	NA	NA	NA
MH0067.scaffold17093_3	9684	10277	-	NONE	NONE	4e-12	NOT_PHAGE	pfam03415, Peptidase_C11, Clostripain family.
MH0009.scaffold32322_1	1596	3053	+	COG1488	[Coenzyme metabolism]	3e-99	NOT_PHAGE	PncB, Nicotinic acid phosphoribosyltransferase .
MH0009.scaffold32322_1	3050	4120	+	NONE	NONE	4e-28	NOT_PHAGE	pfam00150, Cellulase, Cellulase (glycosyl hydrolase family 5).
MH0009.scaffold32322_1	4124	4540	+	COG2153	[General function prediction only]	7e-14	NOT_PHAGE	ElaA, Predicted acyltransferase .
MH0009.scaffold32322_1	4637	5233	+	NONE	NONE	2e-05	NOT_PHAGE	cd02139, Nitroreductase_3, Nitroreductase-like family 3. A subfamily ofthe nitroreductase family containing uncharacterized proteinsthat are similar to nitroreductase. Nitroreductase catalyzesthe reduction of nitroaromatic compounds such asnitrotoluenes, nitrofurans and nitroimidazoles. This process requiresNAD(P)H as electron donor in an obligatory two-electron transferand uses FMN as cofactor. …
MH0009.scaffold32322_1	5720	5866	-	NONE	NONE	1e-11	NOT_PHAGE	pfam12116, SpoIIID, Stage III sporulation protein D. This stage IIIsporulation protein is a small DNA-binding family that isessential for gene expression of the mother-cell compartment duringsporulation. The domain is found in bacteria and viruses,and is about 40 amino acids in length. It has a conservedRGG sequence motif.
MH0009.scaffold32322_1	6607	7356	-	COG0338	[DNA replication, recombination, andrepair]	1e-27	NOT_PHAGE	Dam, Site-specific DNA methylase .
MH0009.scaffold32322_1	7410	8507	-	COG3757	[Cell envelopebiogenesis, outer membrane]	3e-08	NOT_PHAGE	Acm, Lyzozyme M1 (1,4-beta-N-acetylmuramidase) .
MH0009.scaffold32322_1	8891	11716	-	NA	NA	NA	NA	NA
MH0009.scaffold32322_1	12069	15077	-	COG5280	[Function unknown]	3e-18	PHAGE	Phage-related minor tail protein .
MH0009.scaffold32322_1	15148	15750	-	NONE	NONE	1e-29	PHAGE	pfam06854, Phage_Gp15, Bacteriophage Gp15 protein. This family consistsof bacteriophage Gp15 proteins and related bacterial sequences.The function of this family is unknown.
MH0009.scaffold32322_1	15750	16169	-	NA	NA	NA	NA	NA
MH0009.scaffold32322_1	16236	16709	-	NA	NA	NA	NA	NA
MH0009.scaffold32322_1	16721	17104	-	NA	NA	NA	NA	NA
MH0009.scaffold32322_1	18546	19301	-	NA	NA	NA	NA	NA
V1.CD-15.scaffold13246_1	1586	2257	+	COG3646	[Function unknown]	1e-17	PHAGE	Uncharacterized phage-encoded protein .
V1.CD-15.scaffold13246_1	2275	3771	+	COG3378	[General function prediction only]	2e-50	NOT_PHAGE	Predicted ATPase .
V1.CD-15.scaffold13246_1	4254	4481	+	NONE	NONE	0.001	PHAGE	TIGR01764, excise, An excisionase, or Xis protein, is a small protein that binds and promotes excisive recombination; it is not enzymatically active. This model represents a number of putative excisionases and related proteins from temperate phage, plasmids, and transposons, as well as DNA binding domains of other proteins, such as a DNA modification methylase. This model identifies mostly small …
V1.CD-15.scaffold13246_1	5302	6207	+	COG0568	[Transcription]	2e-05	NOT_PHAGE	RpoD, DNA-directed RNA polymerase, sigma subunit (sigma70/sigma32) .
V1.CD-15.scaffold13246_1	6231	6797	+	NA	NA	NA	NA	NA
V1.CD-15.scaffold13246_1	6781	7479	+	NONE	NONE	0.0003	PHAGE	pfam06810, Phage_GP20, Phage minor structural protein GP20. This family consists of several phage minor structural protein GP20 sequences of around 180 residues in length. The function of this family is unknown.
V1.CD-15.scaffold13246_1	7891	9051	-	COG4974	[DNA replication, recombination, and repair]	3e-16	NOT_PHAGE	XerD, Site-specific recombinase XerD .
MH0054.scaffold30060_2	962	2716	-	COG1132	[Defense mechanisms]	e-107	NOT_PHAGE	MdlB, ABC-type multidrug transport system, ATPase and permease components .
MH0054.scaffold30060_2	2847	3470	-	COG1309	[Transcription]	3e-12	NOT_PHAGE	AcrR, Transcriptional regulator .
MH0054.scaffold30060_2	4318	4557	-	COG0629	[DNA replication, recombination, and repair]	4e-06	NOT_PHAGE	Ssb, Single-stranded DNA-binding protein .
MH0054.scaffold30060_2	4747	5475	-	COG2433	[Function unknown]	0.025	NOT_PHAGE	Uncharacterized conserved protein .
MH0054.scaffold30060_2	6533	7030	-	NA	NA	NA	NA	NA
MH0054.scaffold30060_2	7023	8072	-	COG0175	[Amino acid transport and metabolism / Coenzyme metabolism]	6e-13	NOT_PHAGE	CysH, 3'-phosphoadenosine 5'-phosphosulfate sulfotransferase (PAPS reductase)/FAD synthetase and related enzymes .
MH0054.scaffold30060_2	8567	9799	-	COG1475	[Transcription]	4e-06	NOT_PHAGE	Spo0J, Predicted transcriptional regulators .
MH0054.scaffold30060_2	10273	10968	-	NA	NA	NA	NA	NA
MH0054.scaffold30060_2	11606	12529	-	NA	NA	NA	NA	NA
MH0054.scaffold30060_2	14259	15065	-	NONE	NONE	0.01	NOT_PHAGE	PHA00280, PHA00280, putative NHN endonuclease.
MH0054.scaffold30060_2	15330	16049	-	NA	NA	NA	NA	NA
MH0054.scaffold30060_2	16068	16403	-	NA	NA	NA	NA	NA
MH0054.scaffold30060_2	17000	17335	-	NA	NA	NA	NA	NA
MH0054.scaffold30060_2	17389	17907	-	NA	NA	NA	NA	NA
MH0054.scaffold30060_2	17907	18659	-	NA	NA	NA	NA	NA
MH0054.scaffold30060_2	21068	22132	-	COG3757	[Cell envelope biogenesis, outer membrane]	8e-15	NOT_PHAGE	Acm, Lyzozyme M1 (1,4-beta-N-acetylmuramidase) .
MH0054.scaffold30060_2	22203	22907	-	NA	NA	NA	NA	NA
MH0054.scaffold30060_2	24360	25610	-	NONE	NONE	2e-07	NOT_PHAGE	cd01646, RT_Bac_retron_I, RT_Bac_retron_I: Reverse transcriptases (RTs) in bacterial retrotransposons or retrons. The polymerase reaction of this enzyme leads to the production of a unique RNA-DNA complex called msDNA (multicopy single-stranded (ss)DNA) in which a small ssDNA branches out from a small ssRNA molecule via a 2'-5'phosphodiester linkage. Bacterial retron RTs produce cDNA correspondin…
MH0054.scaffold30060_2	25724	26398	-	NA	NA	NA	NA	NA
MH0054.scaffold30060_2	26453	27439	-	NA	NA	NA	NA	NA
MH0054.scaffold30060_2	27454	27849	-	COG5301	[General function prediction only]	0.038	PHAGE	Phage-related tail fibre protein .
MH0054.scaffold30060_2	27846	29123	-	NONE	NONE	4e-13	PHAGE	pfam10076, DUF2313, Uncharacterized protein conserved in bacteria (DUF2313). Members of this family of proteins comprise various hypothetical and putative bacteriophage tail proteins.
MH0054.scaffold30060_2	29129	30247	-	COG3299	[Function unknown]	3e-18	PHAGE	XkdT, Uncharacterized homolog of phage Mu protein gp47 .
MH0054.scaffold30060_2	30262	30384	-	NONE	NONE	0.003	PHAGE	pfam10934, DUF2634, Protein of unknown function (DUF2634). Some members in this family of proteins are annotated as phage related, xkdS however currently there is no known function.
MH0012.scaffold98449_1	38	694	-	NA	NA	NA	NA	NA
MH0012.scaffold98449_1	710	1804	-	NA	NA	NA	NA	NA
MH0012.scaffold98449_1	2601	3260	-	NA	NA	NA	NA	NA
MH0012.scaffold98449_1	3253	3909	-	NA	NA	NA	NA	NA
MH0012.scaffold98449_1	4196	5149	-	NA	NA	NA	NA	NA
MH0012.scaffold98449_1	5149	5994	-	NONE	NONE	1e-07	PHAGE	pfam05709, Sipho_tail, Phage tail protein. This family consists ofseveral Siphovirus and other phage tail component proteins aswell as some bacterial proteins of unknown function.
MH0012.scaffold98449_1	6010	8904	-	COG3941	[General function predictiononly]	0.0006	PHAGE	Mu-like prophage protein .
MH0012.scaffold98449_1	9170	9529	-	NA	NA	NA	NA	NA
MH0012.scaffold98449_1	9550	10164	-	NA	NA	NA	NA	NA
MH0012.scaffold98449_1	10596	10934	-	NONE	NONE	0.044	PHAGE	pfam05521, Phage_H_T_join, Phage head-tail joining protein.
MH0012.scaffold98449_1	10934	11365	-	NA	NA	NA	NA	NA
MH0012.scaffold98449_1	11385	12554	-	NA	NA	NA	NA	NA
MH0012.scaffold98449_1	12554	13156	-	NONE	NONE	3e-07	PHAGE	pfam06810, Phage_GP20, Phage minor structural protein GP20. Thisfamily consists of several phage minor structural protein GP20sequences of around 180 residues in length. The function ofthis family is unknown.
MH0012.scaffold98449_1	13823	14494	-	NONE	NONE	5e-10	PHAGE	pfam04233, Phage_Mu_F, Phage Mu protein F like protein. Members ofthis family are found in double-stranded DNA bacteriophages, andin some bacteria. A member of this family is required forviral head morphogenesis in bacteriophage SPP1. This familyis possibly a minor head protein. This family may berelated to the family TT_ORF1 (pfam02956).
MH0011.scaffold75669_1	1758	3272	-	NONE	NONE	2e-15	PHAGE	pfam05133, Phage_prot_Gp6, Phage portal protein, SPP1 Gp6-like. This protein forms a hole, or portal, that enables DNA passage during packaging and ejection. It also forms the junction between the phage head (capsid) and the tail proteins. During SPP1 morphogenesis, Gp6 participates in the procapsid assembly reaction. This family also includes family Phage_min_cap, pfam05126.
MH0011.scaffold75669_1	3283	4719	-	COG1783	[General function prediction only]	5e-28	PHAGE	XtmB, Phage terminase large subunit .
MH0011.scaffold75669_1	5065	5805	-	COG1475	[Transcription]	0.013	NOT_PHAGE	Spo0J, Predicted transcriptional regulators .
MH0011.scaffold75669_1	5808	6479	-	COG0175	[Amino acid transport and metabolism / Coenzyme metabolism]	1e-09	NOT_PHAGE	CysH, 3'-phosphoadenosine 5'-phosphosulfate sulfotransferase (PAPS reductase)/FAD synthetase and related enzymes .
MH0011.scaffold75669_1	7911	8777	-	NONE	NONE	4e-28	NOT_PHAGE	pfam12224, Amidoligase_2, Putative amidoligase enzyme. This family of proteins are likely to act as amidoligase enzymes Protein in this family are found in conserved gene neighborhoods encoding a glutamine amidotransferase-like thiol peptidase (in proteobacteria) or an Aig2 family cyclotransferase protein (in firmicutes).
MH0011.scaffold75669_1	12149	13801	-	COG1474	[DNA replication, recombination, and repair / Posttranslational modification, protein turnover, chaperones]	0.043	NOT_PHAGE	CDC6, Cdc6-related protein, AAA superfamily ATPase .
MH0011.scaffold75669_1	14958	16376	-	NA	NA	NA	NA	NA
MH0011.scaffold75669_1	16817	17572	-	NA	NA	NA	NA	NA
MH0011.scaffold75669_1	17886	18521	-	COG1484	[DNA replication, recombination, and repair]	1e-05	NOT_PHAGE	DnaC, DNA replication protein .
MH0011.scaffold75669_1	18472	19347	-	NA	NA	NA	NA	NA
MH0011.scaffold75669_1	19867	21072	-	COG1061	[Transcription / DNA replication, recombination, and repair]	3e-51	NOT_PHAGE	SSL2, DNA or RNA helicases of superfamily II .
MH0011.scaffold75669_1	21023	21631	-	NONE	NONE	1e-08	NOT_PHAGE	pfam07463, NUMOD4, NUMOD4 motif. NUMOD4 is a putative DNA-binding motif found in homing endonucleases and related proteins.
MH0011.scaffold75669_1	22746	23483	-	NA	NA	NA	NA	NA
MH0011.scaffold75669_1	24811	25581	-	NA	NA	NA	NA	NA
MH0011.scaffold75669_1	25562	26497	-	NONE	NONE	6e-12	PHAGE	TIGR01618, phage_P_loop, This model represents an uncharacterized family of proteins from a number of phage of Gram-positive bacteria. This protein contains a P-loop motif, G/A-X-X-G-X-G-K-T near its amino end. The function of this protein is unknown.
MH0011.scaffold75669_1	27656	27874	-	COG3311	[Transcription]	0.005	NOT_PHAGE	AlpA, Predicted transcriptional regulator .
MH0011.scaffold75669_1	28585	29223	+	COG2932	[Transcription]	0.002	NOT_PHAGE	Predicted transcriptional regulator .
MH0049.scaffold1035_1	3362	4096	+	COG4712	[Function unknown]	3e-31	NOT_PHAGE	Uncharacterized protein conserved in bacteria .
MH0049.scaffold1035_1	5741	6412	+	NA	NA	NA	NA	NA
MH0049.scaffold1035_1	7615	8280	+	NA	NA	NA	NA	NA
MH0049.scaffold1035_1	8340	9557	+	NONE	NONE	0.029	NOT_PHAGE	pfam07478, Dala_Dala_lig_C, D-ala D-ala ligase C-terminus. This family represents the C-terminal, catalytic domain of the D-alanine--D-alanine ligase enzyme EC:6.3.2.4. D-Alanine is one of the central molecules of the cross-linking step of peptidoglycan assembly. There are three enzymes involved in the D-alanine branch of peptidoglycan biosynthesis: the pyridoxal phosphate-dependent D-alanine rac…
MH0049.scaffold1035_1	10682	11434	+	COG3645	[Function unknown]	4e-32	PHAGE	Uncharacterized phage-encoded protein .
V1.UC-13.scaffold68408_2	23	1312	+	NONE	NONE	2e-73	NOT_PHAGE	PHA00144, PHA00144, major head protein.
V1.UC-13.scaffold68408_2	1416	3500	+	NONE	NONE	3e-20	PHAGE	PHA00965, PHA00965, tail protein.
V1.UC-13.scaffold68408_2	3494	3802	-	NA	NA	NA	NA	NA
V1.UC-13.scaffold68408_2	3872	4399	+	NONE	NONE	7e-33	NOT_PHAGE	PHA00147, PHA00147, upper collar protein.
V1.UC-13.scaffold68408_2	4396	5148	+	NONE	NONE	4e-27	NOT_PHAGE	PHA00148, PHA00148, lower collar protein.
V1.UC-13.scaffold68408_2	5761	6120	+	NA	NA	NA	NA	NA
V1.UC-13.scaffold68408_2	6131	7147	+	COG1196	[Cell division and chromosome partitioning]	0.003	NOT_PHAGE	Smc, Chromosome segregation ATPases .
V1.UC-13.scaffold68408_2	7158	8429	+	NONE	NONE	0.006	NOT_PHAGE	pfam00877, NLPC_P60, NlpC/P60 family. The function of this domain is unknown. It is found in several lipoproteins.
V1.UC-13.scaffold68408_2	8405	9451	+	NONE	NONE	2e-67	NOT_PHAGE	PHA00149, PHA00149, DNA encapsidation protein.
V1.UC-13.scaffold68408_2	9664	10596	+	COG5632	[Cell envelope biogenesis, outer membrane]	2e-07	NOT_PHAGE	N-acetylmuramoyl-L-alanine amidase .
MH0055.scaffold1470_2	498	908	-	COG1468	[DNA replication, recombination, andrepair]	1e-14	NOT_PHAGE	RecB family exonuclease .
MH0055.scaffold1470_2	1005	3413	-	COG1203	[General function prediction only]	1e-52	NOT_PHAGE	Predicted helicases .
MH0055.scaffold1470_2	3447	4145	-	NONE	NONE	2e-14	NOT_PHAGE	TIGR01895, cas_Cas5t, CRISPR is a term for Clustered Regularly InterspacedShort Palidromic Repeats. A number of protein familiesappear only in association with these repeats and are designatedCas (CRISPR associated) proteins. This family isrepresented by TM1800 from Thermotoga maritima. It is related toTIGR01868 (CRISPR-associated protein, CT1976 family).
MH0055.scaffold1470_2	4129	5031	-	COG1857	[DNA replication, recombination, and repair]	2e-15	NOT_PHAGE	Uncharacterized protein predicted to be involved inDNA repair .
MH0055.scaffold1470_2	5000	6685	-	NONE	NONE	3e-13	NOT_PHAGE	pfam09706, Cas_CXXC_CXXC, CRISPR-associated protein (Cas_CXXC_CXXC). CRISPR is a term for Clustered, Regularly Interspaced ShortPalindromic Repeats. A number of protein families appear onlyin association with these repeats and are designated Cas(CRISPR-Associated) proteins. This entry describes a conservedregion of about 65 amino acids from an otherwise highlydivergent protein found in a minority…
MH0055.scaffold1470_2	6701	7423	-	COG1583	[DNA replication, recombination, andrepair]	6e-07	NOT_PHAGE	Uncharacterized protein predicted to be involved inDNA repair (RAMP superfamily) .
MH0055.scaffold1470_2	7915	8613	-	COG5018	[General function prediction only]	8e-14	NOT_PHAGE	KapD, Inhibitor of the KinA pathway to sporulation, predictedexonuclease .
MH0055.scaffold1470_2	10193	10777	+	NA	NA	NA	NA	NA
MH0055.scaffold1470_2	8780	10240	-	COG0210	[DNA replication, recombination,and repair]	3e-82	NOT_PHAGE	UvrD, Superfamily I DNA and RNA helicases .
MH0055.scaffold1470_2	11232	20051	-	NA	NA	NA	NA	NA
MH0055.scaffold1470_2	20230	21363	-	NA	NA	NA	NA	NA
MH0055.scaffold1470_2	21363	22271	-	COG1396	[Transcription]	7e-09	NOT_PHAGE	HipB, Predicted transcriptional regulators .
MH0055.scaffold1470_2	22355	23062	-	COG2738	[General function predictiononly]	4e-64	NOT_PHAGE	Predicted Zn-dependent protease .
MH0055.scaffold1470_2	23174	24016	-	COG3757	[Cell envelopebiogenesis, outer membrane]	2e-06	NOT_PHAGE	Acm, Lyzozyme M1 (1,4-beta-N-acetylmuramidase) .
MH0055.scaffold1470_2	26121	27041	-	COG3757	[Cell envelopebiogenesis, outer membrane]	7e-16	NOT_PHAGE	Acm, Lyzozyme M1 (1,4-beta-N-acetylmuramidase) .
MH0055.scaffold1470_2	27043	27180	-	COG4824	[General functionprediction only]	6e-05	PHAGE	Phage-related holin (Lysis protein) .
MH0055.scaffold1470_2	27487	28440	-	NA	NA	NA	NA	NA
MH0055.scaffold1470_2	28453	29175	-	NA	NA	NA	NA	NA
MH0055.scaffold1470_2	29194	31164	-	NA	NA	NA	NA	NA
MH0055.scaffold1470_2	31555	32622	-	NONE	NONE	0.028	PHAGE	PRK09782, PRK09782, bacteriophage N4 receptor, outer membrane subunit;Provisional.
MH0026.scaffold29819_1	243	569	+	NA	NA	NA	NA	NA
MH0026.scaffold29819_1	566	1051	+	NA	NA	NA	NA	NA
MH0026.scaffold29819_1	1118	1798	-	NA	NA	NA	NA	NA
MH0026.scaffold29819_1	2240	2791	-	COG5005	[General function prediction only]	0.0001	PHAGE	Mu-like prophage protein gpG .
MH0026.scaffold29819_1	3028	3210	-	COG0484	[Posttranslational modification, protein turnover, chaperones]	0.047	NOT_PHAGE	DnaJ, DnaJ-class molecular chaperone with C-terminal Zn finger domain .
MH0026.scaffold29819_1	3224	3892	-	NONE	NONE	2e-08	NOT_PHAGE	pfam11363, DUF3164, Protein of unknown function (DUF3164). This family of proteins has no known function.
MH0026.scaffold29819_1	4079	4576	-	NA	NA	NA	NA	NA
MH0026.scaffold29819_1	4884	5522	-	COG0467	[Signal transduction mechanisms]	0.0006	NOT_PHAGE	RAD55, RecA-superfamily ATPases implicated in signal transduction .
MH0026.scaffold29819_1	5745	6623	-	COG2842	[General function prediction only]	2e-06	NOT_PHAGE	Uncharacterized ATPase, putative transposase .
MH0026.scaffold29819_1	6647	8581	-	NA	NA	NA	NA	NA
MH0026.scaffold29819_1	8657	9067	-	NA	NA	NA	NA	NA
MH0026.scaffold29819_1	9226	10092	+	COG2932	[Transcription]	3e-08	NOT_PHAGE	Predicted transcriptional regulator .
MH0026.scaffold29819_1	10848	11306	-	COG0307	[Coenzyme metabolism]	3e-43	NOT_PHAGE	RibC, Riboflavin synthase alpha chain .
MH0026.scaffold29819_1	11796	13247	+	COG0642	[Signal transduction mechanisms]	2e-37	NOT_PHAGE	BaeS, Signal transduction histidine kinase .
MH0026.scaffold29819_1	13434	14081	+	COG0745	[Signal transduction mechanisms / Transcription]	4e-46	NOT_PHAGE	OmpR, Response regulators consisting of a CheY-like receiver domain and a winged-helix DNA-binding domain .
MH0026.scaffold29819_1	14544	14852	+	COG0360	[Translation, ribosomal structure and biogenesis]	4e-15	NOT_PHAGE	RpsF, Ribosomal protein S6 .
MH0026.scaffold29819_1	15203	15742	+	COG0359	[Translation, ribosomal structure and biogenesis]	8e-22	NOT_PHAGE	RplI, Ribosomal protein L9 .
MH0043.scaffold42498_1	41	1711	+	COG2369	[Function unknown]	1e-08	PHAGE	Uncharacterized protein, homolog of phage Mu protein gp30 .
MH0043.scaffold42498_1	1996	2394	+	NONE	NONE	3e-06	PHAGE	pfam04883, DUF646, Bacteriophage protein of unknown function (DUF646). This family of proteins is found in the caudovirales. It may be a tail component.
MH0043.scaffold42498_1	2517	3107	+	NA	NA	NA	NA	NA
MH0043.scaffold42498_1	3109	4272	+	NA	NA	NA	NA	NA
MH0043.scaffold42498_1	4300	4707	+	NONE	NONE	0.012	NOT_PHAGE	pfam11436, DUF3199, Protein of unknown function (DUF3199). Some members in this family of proteins with unknown function are annotated as YqbG however this cannot be confirmed. Currently the proteins has no known function.
MH0043.scaffold42498_1	4709	5059	+	NA	NA	NA	NA	NA
MH0043.scaffold42498_1	5056	5424	+	NA	NA	NA	NA	NA
MH0043.scaffold42498_1	5955	7337	+	COG4974	[DNA replication, recombination, and repair]	4e-18	NOT_PHAGE	XerD, Site-specific recombinase XerD .
MH0043.scaffold42498_1	8347	8622	+	NONE	NONE	4e-07	PHAGE	pfam09681, Phage_rep_org_N, N-terminal phage replisome organiser (Phage_rep_org_N). This entry represents the N-terminal domain of a small family of phage proteins. The protein contains a region of low-complexity sequence that reflects DNA direct repeats able to function as an origin of phage replication. The region is N-terminal to the low-complexity region.
MH0043.scaffold42498_1	9619	9951	+	NA	NA	NA	NA	NA
MH0043.scaffold42498_1	10712	11383	+	NA	NA	NA	NA	NA
V1.UC-14.scaffold88877_1	1190	2194	-	NONE	NONE	2e-28	PHAGE	pfam04984, Phage_sheath_1, Phage tail sheath protein. This family includes a variety of phage tail sheath proteins.
V1.UC-14.scaffold88877_1	3915	5126	-	COG4653	[General function prediction only]	8e-17	PHAGE	Predicted phage phi-C31 gp36 major capsid-like protein .
V1.UC-14.scaffold88877_1	5758	6984	-	COG4695	[Function unknown]	3e-22	PHAGE	Phage-related protein .
V1.UC-14.scaffold88877_1	6997	8736	-	COG4626	[General function prediction only]	3e-36	PHAGE	Phage terminase-like protein, large subunit .
V1.UC-14.scaffold88877_1	13173	14024	-	NA	NA	NA	NA	NA
V1.UC-14.scaffold88877_1	14029	15282	-	COG1475	[Transcription]	0.014	NOT_PHAGE	Spo0J, Predicted transcriptional regulators .
V1.UC-14.scaffold88877_1	15283	16017	-	COG1192	[Cell division and chromosome partitioning]	2e-33	NOT_PHAGE	Soj, ATPases involved in chromosome partitioning .
V1.UC-14.scaffold88877_1	16928	17803	-	COG0330	[Posttranslational modification, protein turnover, chaperones]	2e-12	NOT_PHAGE	HflC, Membrane protease subunits, stomatin/prohibitin homologs .
V1.UC-14.scaffold88877_1	22393	23472	+	COG4823	[Defense mechanisms]	1e-19	PHAGE	AbiF, Abortive infection bacteriophage resistance protein .
V1.UC-14.scaffold88877_1	23719	24918	+	COG4974	[DNA replication, recombination, and repair]	3e-07	NOT_PHAGE	XerD, Site-specific recombinase XerD .
MH0079.scaffold48694_4	4423	4761	-	NA	NA	NA	NA	NA
MH0079.scaffold48694_4	5286	5969	-	NA	NA	NA	NA	NA
MH0079.scaffold48694_4	6295	7170	-	NA	NA	NA	NA	NA
MH0079.scaffold48694_4	8232	8540	-	NA	NA	NA	NA	NA
MH0079.scaffold48694_4	9492	9860	-	NA	NA	NA	NA	NA
MH0076.scaffold72259_1	268	630	+	NA	NA	NA	NA	NA
MH0076.scaffold72259_1	800	1093	+	NONE	NONE	0.0001	PHAGE	pfam04448, DUF551, Protein of unknown function (DUF551). This family represents the carboxy terminus of a protein of unknown function, found in dsDNA viruses with no RNA stage, including bacteriophages lambda and P22, and also in some Escherichia coli prophages.
MH0076.scaffold72259_1	1162	1518	+	NA	NA	NA	NA	NA
MH0076.scaffold72259_1	1515	1943	+	NA	NA	NA	NA	NA
MH0076.scaffold72259_1	2905	3522	+	NONE	NONE	0.023	NOT_PHAGE	TIGR02170, thyX, Two forms of microbial thymidylate synthase are known: ThyA (2.1.1.45) and ThyX (2.1.1.148). This model describes ThyX, a homotetrameric flavoprotein. Both enzymes convert dUMP to dTMP. Under oxygen-limiting conditions, thyX can complement a thyA mutation.
MH0076.scaffold72259_1	4003	4323	+	NA	NA	NA	NA	NA
MH0076.scaffold72259_1	4332	4733	+	COG0756	[Nucleotide transport and metabolism]	5e-33	NOT_PHAGE	Dut, dUTPase .
MH0076.scaffold72259_1	4825	5214	-	NA	NA	NA	NA	NA
MH0076.scaffold72259_1	5259	5738	-	NA	NA	NA	NA	NA
MH0076.scaffold72259_1	6329	6949	+	NA	NA	NA	NA	NA
MH0076.scaffold72259_1	7494	8873	+	COG1783	[General function prediction only]	2e-12	PHAGE	XtmB, Phage terminase large subunit .
MH0076.scaffold72259_1	8925	9290	+	NA	NA	NA	NA	NA
MH0076.scaffold72259_1	9354	10217	+	NONE	NONE	4e-05	NOT_PHAGE	PRK13108, PRK13108, prolipoprotein diacylglyceryl transferase; Reviewed.
MH0076.scaffold72259_1	10231	11301	+	NA	NA	NA	NA	NA
MH0040.scaffold35825_2	507	2210	+	COG0659	[Inorganic ion transport and metabolism]	3e-99	NOT_PHAGE	SUL1, Sulfate permease and related transporters (MFS superfamily) .
MH0040.scaffold35825_2	4259	5131	+	NONE	NONE	0.029	NOT_PHAGE	pfam01080, Presenilin, Presenilin. Mutations in presenilin-1 are a major cause of early onset Alzheimer's disease. It has been found that presenilin-1 binds to beta-catenin in-vivo. This family also contains SPE proteins from C.elegans.
MH0040.scaffold35825_2	5197	5550	+	COG3728	[DNA replication, recombination, and repair]	1e-09	PHAGE	XtmA, Phage terminase, small subunit .
MH0040.scaffold35825_2	5537	6808	+	COG1783	[General function prediction only]	8e-47	PHAGE	XtmB, Phage terminase large subunit .
MH0040.scaffold35825_2	6818	8203	+	NONE	NONE	2e-77	PHAGE	TIGR01538, portal_SPP1, This model represents one of several distantly related families of phage portal protein. This protein forms a hole, or portal, that enables DNA passage during packaging and ejection. It also forms the junction between the phage head (capsid) and the tail proteins. It functions as a dodecamer of a single polypeptide of average mol. wt. of 40-90 KDa.
MH0040.scaffold35825_2	8187	9842	+	COG2369	[Function unknown]	1e-06	PHAGE	Uncharacterized protein, homolog of phage Mu protein gp30 .
MH0040.scaffold35825_2	10429	12513	+	NA	NA	NA	NA	NA
O2.UC-20.scaffold31939_2	1384	1950	+	NA	NA	NA	NA	NA
O2.UC-20.scaffold31939_2	709	1311	-	NA	NA	NA	NA	NA
O2.UC-20.scaffold31939_2	1984	2658	-	NA	NA	NA	NA	NA
O2.UC-20.scaffold31939_2	2655	3227	-	NONE	NONE	3e-13	PHAGE	pfam10076, DUF2313, Uncharacterized protein conserved in bacteria (DUF2313). Members of this family of proteins comprise various hypothetical and putative bacteriophage tail proteins.
O2.UC-20.scaffold31939_2	3217	4278	-	COG3299	[Function unknown]	2e-26	PHAGE	XkdT, Uncharacterized homolog of phage Mu protein gp47 .
O2.UC-20.scaffold31939_2	4335	4742	-	NONE	NONE	1e-21	PHAGE	pfam10934, DUF2634, Protein of unknown function (DUF2634). Some members in this family of proteins are annotated as phage related, xkdS however currently there is no known function.
O2.UC-20.scaffold31939_2	4743	5234	-	NONE	NONE	0.0002	NOT_PHAGE	pfam10844, DUF2577, Protein of unknown function (DUF2577). This family of proteins has no known function.
O2.UC-20.scaffold31939_2	5249	6217	-	NA	NA	NA	NA	NA
O2.UC-20.scaffold31939_2	6214	7035	-	NA	NA	NA	NA	NA
O2.UC-20.scaffold31939_2	7045	9135	-	COG5281	[Function unknown]	0.0005	PHAGE	Phage-related minor tail protein .
O2.UC-20.scaffold31939_2	9319	9726	-	NONE	NONE	1e-24	PHAGE	pfam08890, XkdN, Phage XkdN-like protein. This family of proteins are functionally uncharacterized. They are found in prophage sequence in various bacteria.
O2.UC-20.scaffold31939_2	9742	10215	-	NONE	NONE	1e-10	PHAGE	pfam09393, DUF2001, Protein of unknown function (DUF2001). This family includes phage-like element PBSX protein whose structure adopts a beta barrel flanked with alpha helical regions.
O2.UC-20.scaffold31939_2	10234	11577	-	NONE	NONE	1e-80	PHAGE	pfam04984, Phage_sheath_1, Phage tail sheath protein. This family includes a variety of phage tail sheath proteins.
O2.UC-20.scaffold31939_2	11736	12116	-	NA	NA	NA	NA	NA
O2.UC-20.scaffold31939_2	12179	12682	-	NA	NA	NA	NA	NA
O2.UC-20.scaffold31939_2	12679	13062	-	NA	NA	NA	NA	NA
O2.UC-20.scaffold31939_2	13074	13592	-	NA	NA	NA	NA	NA
O2.UC-20.scaffold31939_2	13855	14898	-	COG4834	[Function unknown]	1e-28	NOT_PHAGE	Uncharacterized protein conserved in bacteria .
O2.UC-20.scaffold31939_2	14914	15447	-	NA	NA	NA	NA	NA
MH0056.scaffold6096_2	207	875	-	COG0860	[Cell envelope biogenesis, outer membrane]	8e-07	NOT_PHAGE	AmiC, N-acetylmuramoyl-L-alanine amidase .
MH0056.scaffold6096_2	880	1206	-	NA	NA	NA	NA	NA
MH0056.scaffold6096_2	1214	1684	-	COG4824	[General function prediction only]	7e-14	PHAGE	Phage-related holin (Lysis protein) .
MH0056.scaffold6096_2	1767	2732	-	COG2755	[Amino acid transport and metabolism]	0.0001	NOT_PHAGE	TesA, Lysophospholipase L1 and related esterases .
MH0056.scaffold6096_2	2832	3626	-	NONE	NONE	0.0002	NOT_PHAGE	pfam01391, Collagen, Collagen triple helix repeat (20 copies). Members of this family belong to the collagen superfamily. Collagens are generally extracellular structural proteins involved in formation of connective tissue structure. The alignment contains 20 copies of the G-X-Y repeat that forms a triple helix. The first position of the repeat is glycine, the second and third positions can be an…
MH0056.scaffold6096_2	3688	5373	-	COG4675	[Function unknown]	6e-06	NOT_PHAGE	MdpB, Microcystin-dependent protein .
MH0056.scaffold6096_2	5415	7061	-	NA	NA	NA	NA	NA
MH0056.scaffold6096_2	7066	7440	-	NA	NA	NA	NA	NA
MH0056.scaffold6096_2	8788	9630	+	NA	NA	NA	NA	NA
MH0056.scaffold6096_2	7449	8441	-	COG5412	[Function unknown]	0.0004	PHAGE	Phage-related protein .
MH0056.scaffold6096_2	9699	10268	-	NA	NA	NA	NA	NA
MH0056.scaffold6096_2	10265	10624	-	NA	NA	NA	NA	NA
MH0056.scaffold6096_2	10736	11068	-	NONE	NONE	0.018	NOT_PHAGE	pfam00580, UvrD-helicase, UvrD/REP helicase. The Rep family helicases are composed of four structural domains. The Rep family function as dimers. REP helicases catalyse ATP dependent unwinding of double stranded DNA to single stranded DNA. Bacillus subtilis addA and Escherichia coli exodeoxyribonuclease V beta have large insertions near to the carboxy-terminus relative to other members of the fam…
MH0056.scaffold6096_2	11049	11813	+	NA	NA	NA	NA	NA
MH0042.scaffold21573_1	97	1140	-	COG4974	[DNA replication, recombination, and repair]	2e-13	NOT_PHAGE	XerD, Site-specific recombinase XerD .
MH0042.scaffold21573_1	1272	1736	-	NA	NA	NA	NA	NA
MH0042.scaffold21573_1	1780	2553	-	COG1974	[Transcription / Signal transduction mechanisms]	4e-13	NOT_PHAGE	LexA, SOS-response transcriptional repressors (RecA-mediated autopeptidases) .
MH0042.scaffold21573_1	4072	4881	+	COG3645	[Function unknown]	4e-26	PHAGE	Uncharacterized phage-encoded protein .
MH0042.scaffold21573_1	5507	5815	+	NA	NA	NA	NA	NA
MH0042.scaffold21573_1	5802	8306	+	COG0553	[Transcription / DNA replication, recombination, and repair]	4e-07	NOT_PHAGE	HepA, Superfamily II DNA/RNA helicases, SNF2 family .
MH0042.scaffold21573_1	8309	9361	+	COG0592	[DNA replication, recombination, and repair]	1e-40	NOT_PHAGE	DnaN, DNA polymerase sliding clamp subunit (PCNA homolog) .
MH0042.scaffold21573_1	9444	9977	+	NONE	NONE	3e-28	PHAGE	pfam05565, Sipho_Gp157, Siphovirus Gp157. This family contains both viral and bacterial proteins which are related to the Gp157 protein of the Streptococcus thermophilus SFi bacteriophages. It is thought that bacteria possessing the gene coding for this protein have an increased resistance to the bacteriophage.
MH0042.scaffold21573_1	9986	10681	+	NA	NA	NA	NA	NA
MH0042.scaffold21573_1	10678	11205	+	NA	NA	NA	NA	NA
MH0042.scaffold21573_1	11730	12086	+	COG0629	[DNA replication, recombination, and repair]	2e-18	NOT_PHAGE	Ssb, Single-stranded DNA-binding protein .
MH0042.scaffold21573_1	12430	13212	+	NONE	NONE	6e-40	PHAGE	pfam09681, Phage_rep_org_N, N-terminal phage replisome organiser (Phage_rep_org_N). This entry represents the N-terminal domain of a small family of phage proteins. The protein contains a region of low-complexity sequence that reflects DNA direct repeats able to function as an origin of phage replication. The region is N-terminal to the low-complexity region.
MH0042.scaffold21573_1	13719	14057	+	COG0756	[Nucleotide transport and metabolism]	2e-23	NOT_PHAGE	Dut, dUTPase .
MH0042.scaffold21573_1	14468	14797	+	NA	NA	NA	NA	NA
MH0042.scaffold21573_1	15541	15774	+	NONE	NONE	3e-07	PHAGE	pfam05866, RusA, Endodeoxyribonuclease RusA. This family consists of several bacterial and phage Holliday junction resolvase (RusA) like proteins. The RusA protein of Escherichia coli is an endonuclease that can resolve Holliday intermediates and correct the defects in genetic recombination and DNA repair associated with inactivation of RuvAB or RuvC.
MH0042.scaffold21573_1	15894	16187	+	COG1595	[Transcription]	0.032	NOT_PHAGE	RpoE, DNA-directed RNA polymerase specialized sigma subunit, sigma24 homolog .
O2.UC-11.scaffold17317_1	62	2575	+	COG0370	[Inorganic ion transport and metabolism]	0	NOT_PHAGE	FeoB, Fe2+ transport system protein B .
O2.UC-11.scaffold17317_1	3092	4261	+	COG4974	[DNA replication, recombination, and repair]	4e-18	NOT_PHAGE	XerD, Site-specific recombinase XerD .
O2.UC-11.scaffold17317_1	4416	5567	+	COG4974	[DNA replication, recombination, and repair]	4e-09	NOT_PHAGE	XerD, Site-specific recombinase XerD .
O2.UC-11.scaffold17317_1	6608	7990	-	NONE	NONE	0.01	NOT_PHAGE	pfam12421, DUF3672, Fibronectin type III protein. This domain family is found in bacteria and viruses, and is typically between 126 and 146 amino acids in length. The family is found in association with pfam09327, pfam00041. There are two completely conserved G residues that may be functionally important. Many of the proteins in this family are annotated as fibronectin type III however there is l…
O2.UC-11.scaffold17317_1	7997	8869	-	NA	NA	NA	NA	NA
O2.UC-11.scaffold17317_1	8832	9221	+	NA	NA	NA	NA	NA
O2.UC-11.scaffold17317_1	9444	10637	-	NA	NA	NA	NA	NA
O2.UC-11.scaffold17317_1	10840	13554	-	NA	NA	NA	NA	NA
O2.UC-11.scaffold17317_1	13614	15575	-	NA	NA	NA	NA	NA
O2.UC-11.scaffold17317_1	15572	18712	-	COG3941	[General function prediction only]	1e-05	PHAGE	Mu-like prophage protein .
O2.UC-11.scaffold17317_1	19969	20613	-	NA	NA	NA	NA	NA
V1.UC-14.scaffold17066_10	980	2341	-	NA	NA	NA	NA	NA
V1.UC-14.scaffold17066_10	3210	8606	-	NA	NA	NA	NA	NA
V1.UC-14.scaffold17066_10	8588	9772	-	NA	NA	NA	NA	NA
V1.UC-14.scaffold17066_10	9774	10082	-	NA	NA	NA	NA	NA
V1.UC-14.scaffold17066_10	10286	15697	-	COG3941	[General function predictiononly]	6e-09	PHAGE	Mu-like prophage protein .
V1.UC-14.scaffold17066_10	15930	16586	-	NA	NA	NA	NA	NA
V1.UC-14.scaffold17066_10	19076	20311	-	NA	NA	NA	NA	NA
V1.UC-14.scaffold17066_10	20331	20978	-	NA	NA	NA	NA	NA
V1.UC-14.scaffold17066_10	20987	21511	-	NA	NA	NA	NA	NA
V1.UC-14.scaffold17066_10	24058	24861	+	COG0270	[DNA replication, recombination, andrepair]	2e-23	NOT_PHAGE	Dcm, Site-specific DNA methylase .
V1.UC-14.scaffold17066_10	24878	25477	+	NA	NA	NA	NA	NA
V1.UC-14.scaffold17066_10	25825	26694	+	COG1397	[Posttranslational modification, proteinturnover, chaperones]	2e-35	NOT_PHAGE	DraG, ADP-ribosylglycohydrolase .
V1.UC-14.scaffold17066_10	27050	29659	-	NONE	NONE	2e-10	NOT_PHAGE	cd00233, VIP2, VIP2; A family of actin-ADP-ribosylating toxin. Amember of the Bacillus-prodiced vegetative insecticidal proteins(VIPs) possesses high specificity against the major insectpest, corn rootworms, and belongs to a classs of binary toxinsand regulators of biological pathways distinct from classicalA-B toxins. A novel family of insecticidal ADP-ribosyltransferses wereisolated from Bacill…
V1.UC-14.scaffold17066_10	30123	31547	-	NONE	NONE	1e-21	PHAGE	pfam05133, Phage_prot_Gp6, Phage portal protein, SPP1 Gp6-like. This protein forms a hole, or portal, that enables DNA passage duringpackaging and ejection. It also forms the junction betweenthe phage head (capsid) and the tail proteins. DuringSPP1 morphogenesis, Gp6 participates in the procapsid assemblyreaction. This family also includes family Phage_min_cap, pfam05126.
V1.UC-14.scaffold17066_10	31563	32993	-	COG1783	[General function predictiononly]	0.009	PHAGE	XtmB, Phage terminase large subunit .
V1.UC-14.scaffold17066_10	33827	34432	-	NA	NA	NA	NA	NA
V1.UC-14.scaffold17066_10	34439	35554	-	COG1475	[Transcription]	2e-05	NOT_PHAGE	Spo0J, Predicted transcriptional regulators .
V1.UC-14.scaffold17066_10	37178	38185	-	COG0820	[General functionprediction only]	1e-31	NOT_PHAGE	Predicted Fe-S-cluster redox enzyme .
V1.UC-14.scaffold17066_10	38538	39446	-	COG1475	[Transcription]	9e-07	NOT_PHAGE	Spo0J, Predicted transcriptional regulators .
V1.UC-14.scaffold17066_10	40457	41080	-	COG1484	[DNA replication, recombination, andrepair]	5e-12	NOT_PHAGE	DnaC, DNA replication protein .
V1.UC-14.scaffold17066_10	41037	41852	-	NA	NA	NA	NA	NA
V1.UC-14.scaffold17066_10	41900	42658	-	NA	NA	NA	NA	NA
V1.UC-14.scaffold17066_10	43162	43791	-	NA	NA	NA	NA	NA
V1.UC-14.scaffold17066_10	44359	45087	-	COG0595	[General function prediction only]	4e-08	NOT_PHAGE	Predicted hydrolase of the metallo-beta-lactamase superfamily.
V1.UC-14.scaffold17066_10	45094	46032	-	COG3723	[DNAreplication, recombination, and repair]	8e-50	NOT_PHAGE	RecT, Recombinational DNA repair protein (RecE pathway) .
V1.UC-14.scaffold17066_10	46041	48002	-	COG1196	[Cell division and chromosomepartitioning]	3e-09	NOT_PHAGE	Smc, Chromosome segregation ATPases .
V1.UC-14.scaffold17066_10	51050	51880	+	NA	NA	NA	NA	NA
O2.UC-24.scaffold24092_4	857	1480	-	COG0168	[Inorganic ion transport and metabolism]	0.046	NOT_PHAGE	TrkG, Trk-type K+ transport systems, membrane components .
O2.UC-24.scaffold24092_4	2053	3420	-	COG1961	[DNA replication, recombination, and repair]	6e-20	NOT_PHAGE	PinR, Site-specific recombinases, DNA invertase Pin homologs .
O2.UC-24.scaffold24092_4	4453	5307	-	NONE	NONE	1e-23	PHAGE	pfam09524, Phg_2220_C, Conserved phage C-terminus (Phg_2220_C). This entry represents the conserved C-terminal domain of a family of proteins found exclusively in bacteriophage and in bacterial prophage regions. The functions of this domain and the proteins containing it are unknown.
O2.UC-24.scaffold24092_4	5325	5960	-	NONE	NONE	0.028	NOT_PHAGE	PRK04023, PRK04023, DNA polymerase II large subunit; Validated.
O2.UC-24.scaffold24092_4	5982	7343	-	COG0270	[DNA replication, recombination, and repair]	3e-24	NOT_PHAGE	Dcm, Site-specific DNA methylase .
O2.UC-24.scaffold24092_4	7356	7955	-	COG0863	[DNA replication, recombination, and repair]	6e-12	NOT_PHAGE	DNA modification methylase .
O2.UC-24.scaffold24092_4	12967	13701	-	NONE	NONE	2e-05	NOT_PHAGE	cd01713, PAPS_reductase, This domain is found in phosphoadenosine phosphosulphate (PAPS) reductase enzymes or PAPS sulphotransferase. PAPS reductase is part of the adenine nucleotide alpha hydrolases superfamily also including N type ATP PPases and ATP sulphurylases. A highly modified version of the P loop, the fingerprint peptide of mononucleotide-binding proteins, is present in the active site …
O2.UC-24.scaffold24092_4	15007	15732	-	COG1235	[General function prediction only]	2e-08	NOT_PHAGE	PhnP, Metal-dependent hydrolases of the beta-lactamase superfamily I .
O2.UC-24.scaffold24092_4	16033	17133	-	NA	NA	NA	NA	NA
O2.UC-24.scaffold24092_4	17681	19609	-	COG1196	[Cell division and chromosome partitioning]	8e-11	NOT_PHAGE	Smc, Chromosome segregation ATPases .
O2.UC-20.scaffold20333_3	911	1501	-	NA	NA	NA	NA	NA
O2.UC-20.scaffold20333_3	1563	2081	-	COG3498	[General function prediction only]	5e-09	PHAGE	Phage tail tube protein FII .
O2.UC-20.scaffold20333_3	2098	3507	-	COG3497	[General function prediction only]	8e-15	PHAGE	Phage tail sheath protein FI .
O2.UC-20.scaffold20333_3	3819	4328	-	NA	NA	NA	NA	NA
O2.UC-20.scaffold20333_3	4328	5050	-	NA	NA	NA	NA	NA
O2.UC-20.scaffold20333_3	5047	5388	-	NA	NA	NA	NA	NA
O2.UC-20.scaffold20333_3	5446	6459	-	NONE	NONE	8e-72	PHAGE	pfam03864, Phage_cap_E, Phage major capsid protein E. Major capsid protein E is involved with the stabilisation of the condensed form of the DNA molecule in phage heads.
O2.UC-20.scaffold20333_3	6526	6867	-	NA	NA	NA	NA	NA
O2.UC-20.scaffold20333_3	6880	7977	-	COG0740	[Posttranslational modification, protein turnover, chaperones / Intracellular trafficking and secretion]	4e-24	NOT_PHAGE	ClpP, Protease subunit of ATP-dependent Clp proteases .
O2.UC-20.scaffold20333_3	7970	9607	-	COG5511	[General function prediction only]	2e-51	PHAGE	Bacteriophage capsid protein .
O2.UC-20.scaffold20333_3	9853	11703	-	COG5525	[General function prediction only]	e-105	PHAGE	Bacteriophage tail assembly protein .
O2.UC-20.scaffold20333_3	11784	12200	-	NA	NA	NA	NA	NA
O2.UC-20.scaffold20333_3	12262	13017	-	COG5484	[Function unknown]	5e-10	NOT_PHAGE	Uncharacterized conserved protein .
O2.UC-20.scaffold20333_3	13439	13834	+	NA	NA	NA	NA	NA
O2.UC-20.scaffold20333_3	14333	14671	+	NA	NA	NA	NA	NA
O2.UC-20.scaffold20333_3	15089	15934	+	NONE	NONE	0.0003	NOT_PHAGE	PRK12323, PRK12323, DNA polymerase III subunits gamma and tau; Provisional.
O2.UC-20.scaffold20333_3	16037	16384	+	NA	NA	NA	NA	NA
O2.UC-20.scaffold20333_3	16870	17460	+	NA	NA	NA	NA	NA
O2.UC-20.scaffold20333_3	17832	18353	-	NONE	NONE	0.003	PHAGE	pfam06356, DUF1064, Protein of unknown function (DUF1064). This family consists of several phage and bacterial proteins of unknown function.
O2.UC-20.scaffold20333_3	18376	19197	-	NA	NA	NA	NA	NA
O2.UC-20.scaffold20333_3	19519	19953	+	NONE	NONE	0.019	NOT_PHAGE	PRK13533, PRK13533, 7-cyano-7-deazaguanine tRNA-ribosyltransferase; Provisional.
O2.UC-20.scaffold20333_3	20144	20665	-	NA	NA	NA	NA	NA
O2.UC-20.scaffold20333_3	21077	21385	-	NA	NA	NA	NA	NA
O2.UC-20.scaffold20333_3	21412	22065	-	NA	NA	NA	NA	NA
O2.UC-20.scaffold20333_3	23164	23727	-	COG4725	[Signal transduction mechanisms / Transcription]	1e-27	NOT_PHAGE	IME4, Transcriptional activator, adenine-specific DNA methyltransferase .
O2.UC-20.scaffold20333_3	23740	24201	-	COG3584	[Function unknown]	8e-09	NOT_PHAGE	Uncharacterized protein conserved in bacteria .
O2.UC-20.scaffold20333_3	24185	25681	-	COG0270	[DNA replication, recombination, and repair]	3e-20	NOT_PHAGE	Dcm, Site-specific DNA methylase .
O2.UC-20.scaffold20333_3	25678	25995	-	NA	NA	NA	NA	NA
O2.UC-20.scaffold20333_3	26520	26963	-	NA	NA	NA	NA	NA
O2.UC-20.scaffold20333_3	27116	27511	-	NA	NA	NA	NA	NA
O2.UC-20.scaffold20333_3	27619	27960	-	NA	NA	NA	NA	NA
O2.UC-20.scaffold20333_3	27935	28360	-	NA	NA	NA	NA	NA
O2.UC-20.scaffold20333_3	30478	30888	+	NONE	NONE	0.0008	NOT_PHAGE	PRK13355, PRK13355, bifunctional HTH-domain containing protein/aminotransferase; Provisional.
MH0046.scaffold6970_11	878	1843	+	COG2842	[General function prediction only]	4e-21	NOT_PHAGE	Uncharacterized ATPase, putative transposase .
MH0046.scaffold6970_11	1891	2577	-	COG3264	[Cell envelope biogenesis, outer membrane]	0.009	NOT_PHAGE	Small-conductance mechanosensitive channel .
MH0046.scaffold6970_11	4055	4807	+	NA	NA	NA	NA	NA
MH0046.scaffold6970_11	6448	7008	+	NONE	NONE	1e-06	NOT_PHAGE	pfam11985, DUF3486, Protein of unknown function (DUF3486). This family of proteins is functionally uncharacterized. This protein is found in bacteria and viruses. Proteins in this family are about 190 amino acids in length.
MH0046.scaffold6970_11	7795	9561	+	NONE	NONE	2e-12	PHAGE	TIGR01630, psiM2_ORF9, This model represents the C-terminal region of a set of phage proteins typically about 400-500 amino acids in length, although some members are considerably shorter. An article on Methanobacterium phage Psi-M2 (PMID:9791169) calls the member from that phage, ORF9, a putative large terminase subunit, and ORF8 a candidate terminase small subunit. Most proteins in this family …
MH0046.scaffold6970_11	9574	10989	+	NONE	NONE	1e-80	PHAGE	pfam05133, Phage_prot_Gp6, Phage portal protein, SPP1 Gp6-like. This protein forms a hole, or portal, that enables DNA passage during packaging and ejection. It also forms the junction between the phage head (capsid) and the tail proteins. During SPP1 morphogenesis, Gp6 participates in the procapsid assembly reaction. This family also includes family Phage_min_cap, pfam05126.
MH0046.scaffold6970_11	11024	12379	+	COG5585	[Signal transduction mechanisms]	1e-06	NOT_PHAGE	NAD+--asparagine ADP-ribosyltransferase .
MH0046.scaffold6970_11	12694	13353	+	NA	NA	NA	NA	NA
MH0046.scaffold6970_11	13368	14294	+	NA	NA	NA	NA	NA
V1.CD-9.scaffold3062_3	216	509	+	COG0756	[Nucleotide transport and metabolism]	5e-16	NOT_PHAGE	Dut, dUTPase .
V1.CD-9.scaffold3062_3	1144	3156	+	COG1196	[Cell division and chromosome partitioning]	1e-10	NOT_PHAGE	Smc, Chromosome segregation ATPases .
V1.CD-9.scaffold3062_3	3475	4440	+	COG3723	[DNA replication, recombination, and repair]	1e-28	NOT_PHAGE	RecT, Recombinational DNA repair protein (RecE pathway) .
V1.CD-9.scaffold3062_3	6524	7264	+	NA	NA	NA	NA	NA
V1.CD-9.scaffold3062_3	7227	7778	+	NA	NA	NA	NA	NA
V1.CD-9.scaffold3062_3	8418	8534	+	NONE	NONE	0.034	NOT_PHAGE	pfam07659, DUF1599, Domain of Unknown Function (DUF1599).
V1.CD-9.scaffold3062_3	9689	10066	-	NA	NA	NA	NA	NA
V1.CD-9.scaffold3062_3	10138	10548	-	NONE	NONE	3e-24	NOT_PHAGE	PHA00659, V, structural protein P5.
V1.CD-9.scaffold3062_3	11393	12046	-	NA	NA	NA	NA	NA
V1.CD-9.scaffold3062_3	12092	12412	-	NA	NA	NA	NA	NA
V1.CD-9.scaffold3062_3	12879	14081	-	COG2268	[Function unknown]	0.0004	NOT_PHAGE	Uncharacterized protein conserved in bacteria .
V1.CD-9.scaffold3062_3	14564	19231	-	NA	NA	NA	NA	NA
V1.CD-9.scaffold3062_3	20129	21565	-	NONE	NONE	5e-09	PHAGE	pfam05133, Phage_prot_Gp6, Phage portal protein, SPP1 Gp6-like. This protein forms a hole, or portal, that enables DNA passage during packaging and ejection. It also forms the junction between the phage head (capsid) and the tail proteins. During SPP1 morphogenesis, Gp6 participates in the procapsid assembly reaction. This family also includes family Phage_min_cap, pfam05126.
V1.CD-9.scaffold3062_3	21665	22627	+	NA	NA	NA	NA	NA
V1.CD-9.scaffold3062_3	22703	24346	+	NA	NA	NA	NA	NA
V1.CD-9.scaffold3062_3	24595	25038	+	NONE	NONE	0.034	NOT_PHAGE	PRK00252, alaS, alanyl-tRNA synthetase; Reviewed.
V1.CD-9.scaffold3062_3	25063	25776	+	NA	NA	NA	NA	NA
V1.CD-9.scaffold3062_3	25795	26943	+	NONE	NONE	0.007	NOT_PHAGE	pfam05343, Peptidase_M42, M42 glutamyl aminopeptidase. These peptidases are found in Archaea and Bacteria. The example in Lactococcus lactis, PepA, aids growth on milk. Pyrococcus horikoshii contain a thermostable de-blocking aminopeptidase member of this family used commercially for N-terminal protein sequencing.
V1.CD-9.scaffold3062_3	28534	29121	+	NA	NA	NA	NA	NA
V1.CD-9.scaffold3062_3	29954	35605	+	COG1196	[Cell division and chromosome partitioning]	2e-05	NOT_PHAGE	Smc, Chromosome segregation ATPases .
V1.CD-9.scaffold3062_3	36331	37032	+	NA	NA	NA	NA	NA
V1.CD-9.scaffold3062_3	37710	38045	+	NA	NA	NA	NA	NA
V1.CD-9.scaffold3062_3	38052	38543	+	NONE	NONE	0.003	NOT_PHAGE	pfam04414, tRNA_deacylase, D-aminoacyl-tRNA deacylase. Several aminoacyl-tRNA synthetases have the ability to transfer the D-isomer of their amino acid onto their cognate tRNA. D-aminoacyl-tRNA deacylases hydrolyse the ester bond between the polynucleotide and the D-amino acid, thereby preventing the accumulation of such mis-acylated and metabolically inactive tRNA molecules.
V1.CD-9.scaffold3062_3	39036	39932	+	NA	NA	NA	NA	NA
V1.CD-9.scaffold3062_3	38801	39082	-	COG0592	[DNA replication, recombination, and repair]	0.001	NOT_PHAGE	DnaN, DNA polymerase sliding clamp subunit (PCNA homolog) .
V1.CD-9.scaffold3062_3	40397	40882	-	NA	NA	NA	NA	NA
V1.CD-9.scaffold3062_3	41432	41809	-	NA	NA	NA	NA	NA
V1.CD-9.scaffold3062_3	41923	42279	-	NA	NA	NA	NA	NA
V1.CD-9.scaffold3062_3	42290	43618	-	COG0270	[DNA replication, recombination, and repair]	1e-40	NOT_PHAGE	Dcm, Site-specific DNA methylase .
MH0014.scaffold92154_2	798	1808	-	COG3757	[Cell envelope biogenesis, outer membrane]	7e-15	NOT_PHAGE	Acm, Lyzozyme M1 (1,4-beta-N-acetylmuramidase) .
MH0014.scaffold92154_2	2502	2948	-	NA	NA	NA	NA	NA
MH0014.scaffold92154_2	3360	4130	-	NA	NA	NA	NA	NA
MH0014.scaffold92154_2	4144	4839	-	NA	NA	NA	NA	NA
MH0014.scaffold92154_2	5029	6813	-	NONE	NONE	0.0001	PHAGE	pfam07902, Gp58, gp58-like protein. Sequences found in this family are derived from a number of bacteriophage and prophage proteins. They are similar to gp58, a minor structural protein of Lactococcus delbrueckii bacteriophage LL-H.
MH0014.scaffold92154_2	7237	9573	-	COG5412	[Function unknown]	3e-13	PHAGE	Phage-related protein .
MH0014.scaffold92154_2	9590	10126	+	NA	NA	NA	NA	NA
MH0014.scaffold92154_2	10371	11144	+	NA	NA	NA	NA	NA
MH0014.scaffold92154_2	12693	13676	-	NA	NA	NA	NA	NA
MH0014.scaffold92154_2	13696	14319	-	NONE	NONE	0.048	NOT_PHAGE	cd07316, terB_like_DjlA, N-terminal tellurium resistance protein terB-like domain of heat shock DnaJ-like proteins. Tellurium resistance terB-like domain of the DnaJ-like DjlA proteins. This family represents the terB-like domain of DjlA-like proteins, a subgroup of heat shock DnaJ-like proteins. Escherichia coli DjlA is a type III membrane protein with a small N-terminal transmembrane region and…
MH0014.scaffold92154_2	15009	16655	-	NONE	NONE	2e-42	PHAGE	pfam06152, Phage_min_cap2, Phage minor capsid protein 2. Family of related phage minor capsid proteins.
MH0014.scaffold92154_2	16805	18394	-	NONE	NONE	3e-07	PHAGE	TIGR01542, A118_put_portal, This model represents a family of phage minor structural proteins. The protein is suggested to be the head-tail connector, or portal protein, on the basis of its position in the phage gene order, its presence in mature phage, its size, and its conservation across a number of complete genomes of tailed phage that lack other candidate portal proteins. Several other known…
MH0014.scaffold92154_2	18400	19773	-	NONE	NONE	4e-20	PHAGE	TIGR01547, phage_term_2, This model detects members of a highly divergent family of the large subunit of phage terminase. All members are encoded by phage genomes or within prophage regions of bacterial genomes. This is a distinct family from pfam03354.
V1.UC-14.scaffold56426_1	1672	2184	+	NA	NA	NA	NA	NA
V1.UC-14.scaffold56426_1	2691	3464	-	NA	NA	NA	NA	NA
V1.UC-14.scaffold56426_1	3657	4316	-	NONE	NONE	2e-12	PHAGE	pfam06810, Phage_GP20, Phage minor structural protein GP20. This family consists of several phage minor structural protein GP20 sequences of around 180 residues in length. The function of this family is unknown.
V1.UC-14.scaffold56426_1	5520	6254	-	NONE	NONE	0.012	NOT_PHAGE	pfam04102, SlyX, SlyX. The SlyX protein has no known function. It is short less than 80 amino acids and is found close to the slyD gene. The SlyX protein has a conserved PPH(Y/W) motif at its C-terminus. The protein may be a coiled-coil structure.
V1.UC-14.scaffold56426_1	7215	8111	+	NA	NA	NA	NA	NA
V1.UC-14.scaffold56426_1	8078	9337	-	NONE	NONE	2e-24	PHAGE	pfam06152, Phage_min_cap2, Phage minor capsid protein 2. Family of related phage minor capsid proteins.
[truncated: 13,147 more rows]
