# Supplementary material for: CRISPR targeting reveals a reservoir of common phages associated with the human gut microbiome
Source: HighWire-hosted journal article supplement (doi:10.1101/gr.138297.112), 2012-06-25
Supplement: Stern_DatasetS5.xlsx [file Stern_DatasetS5.xlsx]

## Sheet: seed2assignment_based_on_all_OR
Phage contig	Inferred viral family	Number of ORFs classified on contig
MH0012.scaffold110296_1	Ambiguous	5					Ambiguous	647
MH0022.scaffold53395_2	Ambiguous	4					Siphoviridae	237
MH0066.scaffold17926_1	Ambiguous	17					Myoviridae	35
MH0014.scaffold16636_6	Ambiguous	7					Podoviridae	20
MH0060.scaffold84056_1	Ambiguous	2					Other	12
V1.UC-18.scaffold5435_13	Ambiguous	3
V1.CD-11.scaffold56191_3	Ambiguous	8
MH0059.scaffold26881_8	Ambiguous	6
V1.UC-9.scaffold24720_5	Ambiguous	3
MH0057.scaffold10334_1	Ambiguous	17
V1.CD-1.scaffold45234_1	Ambiguous	7
V1.CD-13.scaffold31449_2	Ambiguous	3
MH0082.scaffold54315_2	Ambiguous	7
MH0071.scaffold22053_5	Ambiguous	4
V1.CD-8.scaffold4416_3	Ambiguous	5
V1.UC-10.scaffold27570_5	Ambiguous	6
MH0042.scaffold38994_2	Ambiguous	13
MH0082.scaffold18170_3	Ambiguous	5
MH0071.scaffold389_1	Ambiguous	10
MH0038.scaffold25033_2	Ambiguous	2
MH0032.scaffold7595_3	Ambiguous	3
MH0071.scaffold943_7	Ambiguous	5
V1.UC-19.scaffold36192_1	Ambiguous	2
MH0049.scaffold1508_1	Ambiguous	2
O2.UC-16.scaffold1286_1	Ambiguous	11
V1.UC-18.scaffold3250_1	Ambiguous	4
V1.UC-9.scaffold88471_1	Ambiguous	3
MH0003.scaffold39547_2	Ambiguous	8
O2.UC-12.scaffold10767_4	Ambiguous	4
MH0075.scaffold61433_1	Ambiguous	9
MH0072.scaffold7078_1	Ambiguous	5
V1.UC-15.scaffold3192_8	Ambiguous	2
MH0016.scaffold5377_2	Ambiguous	10
MH0072.scaffold22653_5	Ambiguous	8
MH0020.scaffold18411_2	Ambiguous	13
MH0071.scaffold16344_4	Ambiguous	3
MH0083.scaffold37736_2	Ambiguous	5
MH0071.scaffold11541_1	Ambiguous	2
MH0062.scaffold39214_1	Ambiguous	6
MH0006.scaffold87784_2	Ambiguous	9
V1.CD-9.scaffold77327_1	Ambiguous	3
MH0040.scaffold3535_1	Ambiguous	6
MH0037.scaffold1344_4	Ambiguous	9
MH0059.scaffold93560_1	Ambiguous	4
V1.CD-3.scaffold16967_2	Ambiguous	14
MH0064.scaffold8188_26	Ambiguous	8
O2.UC-19.scaffold72794_6	Ambiguous	3
MH0037.scaffold3610_7	Ambiguous	3
MH0064.scaffold10296_19	Ambiguous	4
MH0050.scaffold7168_1	Ambiguous	8
MH0084.scaffold50691_1	Ambiguous	4
O2.UC-13.scaffold16107_3	Ambiguous	5
V1.UC-9.scaffold25059_16	Ambiguous	12
MH0023.scaffold27080_3	Ambiguous	2
MH0037.scaffold938_4	Ambiguous	4
O2.UC-18.scaffold2660_10	Ambiguous	4
MH0066.scaffold12717_4	Ambiguous	3
V1.UC-15.scaffold4546_2	Ambiguous	10
V1.CD-12.scaffold16802_1	Ambiguous	2
MH0068.scaffold5154_1	Ambiguous	2
O2.UC-11.scaffold7355_2	Ambiguous	12
MH0043.scaffold13467_4	Ambiguous	9
V1.UC-21.scaffold27073_1	Ambiguous	18
MH0080.scaffold21793_1	Ambiguous	10
MH0083.scaffold59817_1	Ambiguous	6
MH0059.scaffold98_1	Ambiguous	3
MH0006.scaffold134601_2	Ambiguous	7
MH0006.scaffold320135_1	Ambiguous	6
MH0069.scaffold16323_9	Ambiguous	3
O2.UC-13.scaffold48461_3	Ambiguous	6
MH0075.scaffold4078_1	Ambiguous	3
MH0009.scaffold32322_1	Ambiguous	4
MH0054.scaffold30060_2	Ambiguous	11
MH0011.scaffold75669_1	Ambiguous	7
MH0049.scaffold1035_1	Ambiguous	2
MH0055.scaffold1470_2	Ambiguous	5
MH0026.scaffold29819_1	Ambiguous	5
V1.UC-14.scaffold88877_1	Ambiguous	8
O2.UC-11.scaffold17317_1	Ambiguous	3
V1.UC-14.scaffold17066_10	Ambiguous	11
O2.UC-24.scaffold24092_4	Ambiguous	5
O2.UC-20.scaffold20333_3	Ambiguous	7
MH0046.scaffold6970_11	Ambiguous	5
V1.CD-9.scaffold3062_3	Ambiguous	5
V1.CD-15.scaffold6320_2	Ambiguous	8
MH0009.scaffold14763_3	Ambiguous	6
V1.UC-9.scaffold24720_4	Ambiguous	2
MH0033.scaffold114125_1	Ambiguous	3
V1.CD-3.scaffold41468_1	Ambiguous	8
MH0083.scaffold24681_2	Ambiguous	4
V1.CD-4.scaffold92930_1	Ambiguous	9
MH0041.scaffold6276_1	Ambiguous	3
MH0054.scaffold15747_1	Ambiguous	10
MH0069.scaffold813_2	Ambiguous	11
MH0003.scaffold3832_3	Ambiguous	21
V1.UC-17.scaffold41729_1	Ambiguous	2
O2.UC-22.scaffold2922_2	Ambiguous	5
V1.CD-6.scaffold13341_2	Ambiguous	4
V1.CD-14.scaffold21213_3	Ambiguous	8
V1.CD-11.scaffold59865_1	Ambiguous	4
V1.CD-13.scaffold7794_1	Ambiguous	3
MH0020.scaffold48159_1	Ambiguous	9
V1.UC-9.scaffold89204_1	Ambiguous	4
MH0053.scaffold96661_1	Ambiguous	9
MH0061.scaffold43240_2	Ambiguous	3
MH0053.scaffold26177_4	Ambiguous	3
V1.CD-9.scaffold14193_1	Ambiguous	17
O2.UC-18.scaffold3130_5	Ambiguous	2
V1.UC-21.scaffold4819_7	Ambiguous	8
V1.UC-6.scaffold69016_3	Ambiguous	2
MH0086.scaffold5584_5	Ambiguous	10
V1.UC-9.scaffold2604_2	Ambiguous	11
MH0016.scaffold33969_1	Ambiguous	22
V1.CD-15.scaffold23874_2	Ambiguous	5
MH0063.scaffold55933_1	Ambiguous	2
MH0083.scaffold87621_3	Ambiguous	5
MH0038.scaffold35814_8	Ambiguous	6
V1.UC-10.scaffold62569_3	Ambiguous	6
MH0067.scaffold45426_1	Ambiguous	6
MH0038.scaffold71865_1	Ambiguous	4
MH0038.scaffold18589_3	Ambiguous	2
V1.CD-6.scaffold55584_4	Ambiguous	6
MH0028.scaffold3573_2	Ambiguous	7
MH0067.scaffold1767_8	Ambiguous	6
MH0054.scaffold33872_1	Ambiguous	3
MH0017.scaffold42056_1	Ambiguous	7
MH0049.scaffold15669_1	Ambiguous	3
V1.UC-21.scaffold27938_2	Ambiguous	10
MH0033.scaffold6810_2	Ambiguous	5
MH0016.scaffold10923_8	Ambiguous	5
MH0053.scaffold2202_7	Ambiguous	12
O2.UC-19.scaffold72423_1	Ambiguous	11
MH0053.scaffold54183_5	Ambiguous	12
V1.CD-4.scaffold5516_2	Ambiguous	2
V1.UC-19.scaffold10147_5	Ambiguous	4
O2.UC-11.scaffold7355_3	Ambiguous	6
MH0065.scaffold88268_7	Ambiguous	6
V1.CD-12.scaffold35543_3	Ambiguous	6
V1.UC-13.scaffold27728_2	Ambiguous	6
MH0040.scaffold77193_1	Ambiguous	4
V1.CD-14.scaffold1847_1	Ambiguous	10
MH0075.scaffold32820_1	Ambiguous	5
MH0055.scaffold53078_7	Ambiguous	5
V1.CD-9.scaffold2683_7	Ambiguous	6
MH0083.scaffold26904_2	Ambiguous	11
MH0012.scaffold70610_4	Ambiguous	3
MH0084.scaffold4795_4	Ambiguous	15
V1.CD-4.scaffold80691_1	Ambiguous	2
MH0059.scaffold34095_3	Ambiguous	3
MH0084.scaffold24915_1	Ambiguous	9
MH0038.scaffold5890_2	Ambiguous	6
V1.CD-8.scaffold87696_1	Ambiguous	4
MH0006.scaffold245228_4	Ambiguous	2
V1.UC-17.scaffold27220_3	Ambiguous	5
MH0084.scaffold45554_1	Ambiguous	12
V1.UC-13.scaffold5882_7	Ambiguous	2
MH0063.scaffold5651_2	Ambiguous	7
V1.UC-9.scaffold84606_1	Ambiguous	3
MH0039.scaffold14107_1	Ambiguous	3
unmapped_K23_L70.scaffold11912_15	Ambiguous	3
O2.UC-18.scaffold6622_1	Ambiguous	11
MH0035.scaffold46816_1	Ambiguous	8
MH0014.scaffold19960_1	Ambiguous	8
MH0009.scaffold35391_2	Ambiguous	4
MH0060.scaffold42692_1	Ambiguous	5
MH0043.scaffold14760_8	Ambiguous	4
MH0064.scaffold11509_6	Ambiguous	9
V1.UC-15.scaffold16828_1	Ambiguous	7
V1.UC-10.scaffold18661_4	Ambiguous	9
O2.UC-20.scaffold49118_4	Ambiguous	6
O2.UC-24.scaffold3140_2	Ambiguous	8
MH0085.scaffold1996_1	Ambiguous	14
MH0033.scaffold106138_1	Ambiguous	4
MH0030.scaffold5258_1	Ambiguous	6
V1.UC-10.scaffold62569_7	Ambiguous	2
MH0043.scaffold39169_5	Ambiguous	11
MH0031.scaffold334_23	Ambiguous	5
V1.CD-1.scaffold6384_1	Ambiguous	4
MH0009.scaffold2868_3	Ambiguous	4
V1.UC-9.scaffold8038_11	Ambiguous	4
V1.UC-18.scaffold47087_5	Ambiguous	18
MH0075.scaffold1473_1	Ambiguous	17
V1.UC-8.scaffold87642_1	Ambiguous	4
MH0020.scaffold47302_3	Ambiguous	6
V1.UC-18.scaffold12733_1	Ambiguous	2
V1.CD-11.scaffold766_1	Ambiguous	8
MH0037.scaffold838_3	Ambiguous	5
MH0083.scaffold37736_1	Ambiguous	8
MH0075.scaffold53673_3	Ambiguous	3
MH0009.scaffold41051_3	Ambiguous	6
MH0083.scaffold21736_4	Ambiguous	20
MH0037.scaffold1380_1	Ambiguous	2
V1.UC-10.scaffold41553_2	Ambiguous	3
MH0062.scaffold48720_2	Ambiguous	9
O2.UC-4.scaffold1030_3	Ambiguous	4
V1.CD-11.scaffold4499_6	Ambiguous	5
O2.UC-17.scaffold5768_1	Ambiguous	8
V1.UC-18.scaffold17044_1	Ambiguous	4
V1.UC-21.scaffold2953_1	Ambiguous	6
V1.CD-6.scaffold13611_3	Ambiguous	6
MH0040.scaffold105584_1	Ambiguous	5
MH0059.scaffold92075_2	Ambiguous	2
V1.CD-12.scaffold46164_1	Ambiguous	2
MH0036.scaffold14124_7	Ambiguous	5
MH0086.scaffold108085_1	Ambiguous	12
V1.UC-18.scaffold14473_5	Ambiguous	3
MH0067.scaffold10776_5	Ambiguous	5
MH0080.scaffold86858_1	Ambiguous	3
V1.CD-8.scaffold35434_2	Ambiguous	6
MH0064.scaffold11647_6	Ambiguous	5
MH0085.scaffold15214_4	Ambiguous	5
MH0083.scaffold60623_1	Ambiguous	2
MH0033.scaffold107232_1	Ambiguous	3
MH0012.scaffold20426_8	Ambiguous	14
MH0045.scaffold16782_10	Ambiguous	6
V1.UC-19.scaffold1123_1	Ambiguous	8
MH0037.scaffold397_7	Ambiguous	8
MH0064.scaffold27658_2	Ambiguous	7
V1.CD-14.scaffold35852_2	Ambiguous	5
MH0059.scaffold89338_1	Ambiguous	15
MH0025.scaffold62644_1	Ambiguous	5
MH0075.scaffold27183_3	Ambiguous	9
V1.CD-3.scaffold43305_3	Ambiguous	25
MH0016.scaffold33786_10	Ambiguous	2
MH0014.scaffold79710_3	Ambiguous	6
MH0086.scaffold31644_3	Ambiguous	6
MH0085.scaffold6127_2	Ambiguous	6
MH0044.scaffold14186_2	Ambiguous	11
V1.CD-8.scaffold119570_1	Ambiguous	2
MH0055.scaffold82928_1	Ambiguous	13
MH0061.scaffold5995_1	Ambiguous	2
MH0003.scaffold27139_4	Ambiguous	4
MH0026.scaffold47727_1	Ambiguous	4
V1.CD-14.scaffold4806_1	Ambiguous	6
MH0080.scaffold32256_3	Ambiguous	7
MH0060.scaffold42692_2	Ambiguous	4
MH0014.scaffold456_3	Ambiguous	10
MH0016.scaffold20741_2	Ambiguous	3
MH0018.scaffold24182_2	Ambiguous	3
V1.UC-21.scaffold18503_4	Ambiguous	3
MH0085.scaffold37908_3	Ambiguous	3
MH0044.scaffold71348_2	Ambiguous	2
O2.UC-16.scaffold1286_2	Ambiguous	5
O2.UC-20.scaffold85126_1	Ambiguous	6
MH0062.scaffold21890_2	Ambiguous	2
O2.UC-24.scaffold2983_2	Ambiguous	11
MH0069.scaffold54593_3	Ambiguous	4
O2.UC-1.scaffold9159_1	Ambiguous	2
MH0066.scaffold16527_9	Ambiguous	7
MH0034.scaffold35015_7	Ambiguous	5
MH0070.scaffold102831_1	Ambiguous	10
MH0040.scaffold7979_1	Ambiguous	9
MH0026.scaffold508_6	Ambiguous	6
MH0086.scaffold23668_4	Ambiguous	5
V1.UC-19.scaffold36897_3	Ambiguous	12
MH0057.scaffold6459_2	Ambiguous	7
MH0055.scaffold83010_1	Ambiguous	3
MH0059.scaffold790_1	Ambiguous	4
MH0070.scaffold25_2	Ambiguous	3
V1.CD-13.scaffold42376_2	Ambiguous	16
MH0006.scaffold58134_1	Ambiguous	4
V1.CD-3.scaffold12934_1	Ambiguous	5
V1.UC-18.scaffold27350_1	Ambiguous	5
MH0053.scaffold25914_1	Ambiguous	12
MH0046.scaffold59362_3	Ambiguous	5
O2.UC-22.scaffold3830_1	Ambiguous	3
MH0072.scaffold1390_5	Ambiguous	11
O2.UC-13.scaffold24953_2	Ambiguous	4
V1.UC-13.scaffold50783_1	Ambiguous	5
MH0016.scaffold22762_6	Ambiguous	8
MH0002.scaffold37810_2	Ambiguous	12
MH0082.scaffold2969_8	Ambiguous	2
MH0010.scaffold4242_2	Ambiguous	12
MH0086.scaffold108085_2	Ambiguous	8
MH0062.scaffold92671_1	Ambiguous	11
MH0081.scaffold78847_4	Ambiguous	6
MH0054.scaffold58693_1	Ambiguous	15
V1.UC-9.scaffold92622_1	Ambiguous	6
MH0039.scaffold69202_2	Ambiguous	4
V1.UC-18.scaffold19868_10	Ambiguous	3
MH0044.scaffold73060_5	Ambiguous	4
MH0072.scaffold31584_7	Ambiguous	5
MH0026.scaffold5104_5	Ambiguous	17
V1.UC-13.scaffold7701_1	Ambiguous	2
MH0058.scaffold20440_2	Ambiguous	6
O2.UC-13.scaffold14173_2	Ambiguous	10
MH0059.scaffold779_6	Ambiguous	2
MH0020.scaffold15386_1	Ambiguous	6
V1.CD-11.scaffold67_8	Ambiguous	7
MH0086.scaffold10615_2	Ambiguous	4
MH0016.scaffold33786_11	Ambiguous	7
MH0012.scaffold98449_3	Ambiguous	7
MH0033.scaffold4517_4	Ambiguous	6
MH0086.scaffold103753_2	Ambiguous	11
MH0084.scaffold3143_1	Ambiguous	8
MH0070.scaffold15739_2	Ambiguous	4
V1.UC-10.scaffold2653_1	Ambiguous	7
O2.UC-18.scaffold10680_2	Ambiguous	6
MH0072.scaffold10110_2	Ambiguous	9
MH0006.scaffold251615_1	Ambiguous	8
V1.UC-6.scaffold9175_7	Ambiguous	8
MH0002.scaffold12413_1	Ambiguous	19
MH0046.scaffold81544_2	Ambiguous	11
MH0075.scaffold3453_3	Ambiguous	7
MH0014.scaffold25887_1	Ambiguous	6
V1.UC-8.scaffold2262_8	Ambiguous	13
MH0044.scaffold1765_5	Ambiguous	5
MH0045.scaffold79977_1	Ambiguous	2
MH0085.scaffold5100_2	Ambiguous	13
MH0037.scaffold34132_2	Ambiguous	6
MH0059.scaffold3152_1	Ambiguous	3
MH0042.scaffold21573_2	Ambiguous	8
MH0070.scaffold57184_3	Ambiguous	11
MH0073.scaffold52383_1	Ambiguous	4
V1.UC-8.scaffold62007_1	Ambiguous	9
V1.CD-9.scaffold64895_1	Ambiguous	17
MH0012.scaffold41141_1	Ambiguous	4
O2.UC-12.scaffold48503_1	Ambiguous	6
V1.CD-11.scaffold4149_5	Ambiguous	4
MH0039.scaffold84301_1	Ambiguous	5
O2.UC-20.scaffold85766_1	Ambiguous	4
MH0009.scaffold33343_1	Ambiguous	5
MH0003.scaffold323_1	Ambiguous	9
O2.UC-11.scaffold3901_1	Ambiguous	2
MH0020.scaffold41215_1	Ambiguous	9
MH0077.scaffold89554_1	Ambiguous	7
MH0055.scaffold24912_1	Ambiguous	11
MH0086.scaffold31644_2	Ambiguous	5
MH0067.scaffold38202_6	Ambiguous	3
MH0011.scaffold4185_3	Ambiguous	6
V1.CD-13.scaffold19581_1	Ambiguous	7
V1.UC-15.scaffold60191_1	Ambiguous	8
V1.CD-11.scaffold29760_1	Ambiguous	11
MH0068.scaffold6082_6	Ambiguous	5
MH0051.scaffold59789_1	Ambiguous	5
V1.CD-14.scaffold33198_1	Ambiguous	3
V1.UC-7.scaffold50299_2	Ambiguous	5
O2.UC-19.scaffold102056_1	Ambiguous	7
V1.CD-8.scaffold4416_2	Ambiguous	12
MH0010.scaffold36924_2	Ambiguous	14
MH0072.scaffold10011_2	Ambiguous	9
MH0033.scaffold918_4	Ambiguous	4
MH0012.scaffold105343_1	Ambiguous	15
MH0075.scaffold9707_1	Ambiguous	7
MH0042.scaffold8772_3	Ambiguous	4
MH0036.scaffold87240_2	Ambiguous	6
V1.CD-3.scaffold26799_2	Ambiguous	7
MH0082.scaffold38564_1	Ambiguous	4
MH0080.scaffold99396_1	Ambiguous	3
MH0026.scaffold1235_10	Ambiguous	5
MH0081.scaffold99673_2	Ambiguous	5
MH0083.scaffold10421_5	Ambiguous	5
MH0055.scaffold16561_16	Ambiguous	9
MH0020.scaffold11698_1	Ambiguous	3
MH0016.scaffold38494_1	Ambiguous	9
MH0058.scaffold52819_8	Ambiguous	3
MH0049.scaffold6460_1	Ambiguous	4
O2.UC-17.scaffold1986_3	Ambiguous	3
V1.UC-15.scaffold1375_10	Ambiguous	8
V1.CD-3.scaffold26311_3	Ambiguous	8
MH0043.scaffold64877_4	Ambiguous	4
V1.UC-8.scaffold29333_5	Ambiguous	4
MH0086.scaffold6117_3	Ambiguous	5
V1.CD-3.scaffold55576_1	Ambiguous	6
V1.CD-3.scaffold25657_1	Ambiguous	8
MH0080.scaffold97187_1	Ambiguous	3
MH0086.scaffold32272_1	Ambiguous	8
MH0086.scaffold70449_5	Ambiguous	4
V1.CD-13.scaffold52007_1	Ambiguous	3
MH0039.scaffold49829_4	Ambiguous	4
V1.UC-19.scaffold23278_1	Ambiguous	3
MH0040.scaffold23751_4	Ambiguous	15
V1.UC-8.scaffold70287_3	Ambiguous	15
MH0003.scaffold76100_1	Ambiguous	4
MH0004.scaffold31758_4	Ambiguous	4
MH0041.scaffold80004_7	Ambiguous	6
MH0006.scaffold1166_11	Ambiguous	5
O2.UC-24.scaffold2873_2	Ambiguous	3
MH0080.scaffold16533_1	Ambiguous	3
V1.UC-14.scaffold34724_1	Ambiguous	10
MH0048.scaffold38030_1	Ambiguous	6
O2.UC-24.scaffold7305_2	Ambiguous	8
V1.UC-9.scaffold85382_2	Ambiguous	3
MH0062.scaffold90147_1	Ambiguous	3
MH0011.scaffold12699_10	Ambiguous	4
MH0064.scaffold7764_1	Ambiguous	5
MH0072.scaffold532_1	Ambiguous	3
MH0086.scaffold109528_2	Ambiguous	6
MH0082.scaffold1604_12	Ambiguous	10
V1.UC-21.scaffold33309_2	Ambiguous	3
O2.UC-1.scaffold6407_1	Ambiguous	6
MH0065.scaffold112151_1	Ambiguous	6
MH0039.scaffold86072_1	Ambiguous	3
MH0016.scaffold10808_2	Ambiguous	10
MH0058.scaffold9227_14	Ambiguous	10
MH0035.scaffold74406_3	Ambiguous	4
O2.UC-4.scaffold10489_1	Ambiguous	3
MH0006.scaffold91343_1	Ambiguous	5
MH0039.scaffold86505_1	Ambiguous	2
MH0038.scaffold4663_2	Ambiguous	9
MH0082.scaffold77342_4	Ambiguous	5
V1.CD-9.scaffold11986_1	Ambiguous	8
MH0053.scaffold100369_1	Ambiguous	12
MH0036.scaffold3873_4	Ambiguous	3
V1.CD-3.scaffold6439_1	Ambiguous	11
MH0020.scaffold25388_1	Ambiguous	6
O2.UC-19.scaffold5902_5	Ambiguous	5
V1.CD-15.scaffold248_1	Ambiguous	2
V1.CD-1.scaffold2160_8	Ambiguous	7
O2.UC-17.scaffold35240_2	Ambiguous	10
MH0012.scaffold920_1	Ambiguous	9
MH0085.scaffold7191_1	Ambiguous	4
MH0028.scaffold22329_2	Ambiguous	7
V1.CD-13.scaffold78038_1	Ambiguous	7
O2.UC-22.scaffold18247_2	Ambiguous	6
MH0011.scaffold57596_1	Ambiguous	5
MH0064.scaffold1204_1	Ambiguous	2
V1.UC-14.scaffold20889_10	Ambiguous	12
V1.CD-14.scaffold57201_10	Ambiguous	6
O2.UC-4.scaffold31332_2	Ambiguous	4
MH0065.scaffold85454_3	Ambiguous	5
MH0020.scaffold2835_2	Ambiguous	5
MH0045.scaffold35413_1	Ambiguous	4
MH0026.scaffold5473_19	Ambiguous	2
V1.UC-18.scaffold5435_12	Ambiguous	3
MH0065.scaffold1761_7	Ambiguous	7
MH0077.scaffold2351_1	Ambiguous	4
V1.UC-19.scaffold6148_14	Ambiguous	9
V1.UC-18.scaffold68310_1	Ambiguous	3
MH0073.scaffold43788_2	Ambiguous	5
V1.UC-9.scaffold65715_4	Ambiguous	11
MH0083.scaffold20030_1	Ambiguous	5
MH0016.scaffold5895_3	Ambiguous	4
MH0059.scaffold3964_14	Ambiguous	13
MH0030.scaffold2277_2	Ambiguous	11
V1.UC-19.scaffold22273_4	Ambiguous	3
MH0070.scaffold71140_3	Ambiguous	9
V1.CD-11.scaffold38611_1	Ambiguous	5
MH0060.scaffold39947_3	Ambiguous	12
V1.CD-9.scaffold14343_2	Ambiguous	9
V1.UC-21.scaffold24103_1	Ambiguous	5
MH0077.scaffold9837_5	Ambiguous	11
MH0050.scaffold92392_2	Ambiguous	4
MH0020.scaffold1215_4	Ambiguous	10
MH0068.scaffold14290_1	Ambiguous	9
MH0061.scaffold14780_1	Ambiguous	6
V1.UC-10.scaffold36768_2	Ambiguous	4
MH0003.scaffold76844_1	Ambiguous	8
MH0062.scaffold69182_4	Ambiguous	5
V1.UC-21.scaffold33309_1	Ambiguous	6
V1.CD-4.scaffold57821_1	Ambiguous	15
MH0078.scaffold8390_3	Ambiguous	23
MH0077.scaffold75225_1	Ambiguous	3
MH0016.scaffold17180_2	Ambiguous	2
MH0057.scaffold44037_2	Ambiguous	2
MH0080.scaffold92402_1	Ambiguous	2
V1.UC-13.scaffold65827_1	Ambiguous	7
MH0068.scaffold550_14	Ambiguous	3
MH0012.scaffold6761_2	Ambiguous	5
V1.UC-19.scaffold7334_2	Ambiguous	4
O2.UC-19.scaffold66851_1	Ambiguous	3
MH0038.scaffold71_2	Ambiguous	2
MH0048.scaffold67133_2	Ambiguous	3
V1.UC-8.scaffold19194_1	Ambiguous	7
MH0053.scaffold82586_1	Ambiguous	10
MH0085.scaffold13328_5	Ambiguous	4
MH0037.scaffold73174_1	Ambiguous	7
MH0070.scaffold26078_1	Ambiguous	12
MH0069.scaffold20126_2	Ambiguous	4
O2.UC-1.scaffold32901_1	Ambiguous	4
MH0067.scaffold7424_1	Ambiguous	3
MH0039.scaffold12233_1	Ambiguous	8
V1.UC-19.scaffold17918_3	Ambiguous	8
MH0020.scaffold3307_1	Ambiguous	6
MH0071.scaffold4110_5	Ambiguous	5
V1.UC-10.scaffold27183_3	Ambiguous	3
O2.UC-4.scaffold4504_1	Ambiguous	9
O2.UC-19.scaffold4071_6	Ambiguous	2
MH0003.scaffold39547_6	Ambiguous	5
MH0062.scaffold76474_1	Ambiguous	3
MH0066.scaffold11939_3	Ambiguous	5
V1.UC-13.scaffold18316_3	Ambiguous	22
MH0054.scaffold27232_2	Ambiguous	3
MH0041.scaffold10213_7	Ambiguous	5
MH0062.scaffold8803_5	Ambiguous	5
O2.UC-24.scaffold27268_1	Ambiguous	3
V1.UC-14.scaffold28005_1	Ambiguous	7
MH0069.scaffold41849_2	Ambiguous	6
O2.UC-24.scaffold3302_12	Ambiguous	7
V1.CD-13.scaffold36743_2	Ambiguous	18
MH0072.scaffold10110_3	Ambiguous	7
O2.UC-19.scaffold63330_1	Ambiguous	4
MH0028.scaffold49524_2	Ambiguous	3
MH0057.scaffold18651_4	Ambiguous	8
V1.UC-14.scaffold7074_1	Ambiguous	4
MH0011.scaffold13604_7	Ambiguous	4
MH0074.scaffold43559_3	Ambiguous	7
V1.UC-8.scaffold97023_5	Ambiguous	3
O2.UC-13.scaffold2698_1	Ambiguous	5
MH0075.scaffold61189_1	Ambiguous	4
MH0054.scaffold21476_13	Ambiguous	12
MH0037.scaffold69436_5	Ambiguous	10
MH0057.scaffold32231_4	Ambiguous	8
O2.UC-23.scaffold62780_1	Ambiguous	4
O2.UC-22.scaffold3239_3	Ambiguous	8
MH0016.scaffold5895_2	Ambiguous	3
MH0012.scaffold25695_1	Ambiguous	6
O2.UC-19.scaffold17094_1	Ambiguous	13
MH0045.scaffold39387_1	Ambiguous	14
MH0012.scaffold35480_2	Ambiguous	5
MH0006.scaffold313732_3	Ambiguous	2
MH0054.scaffold22733_2	Ambiguous	4
O2.UC-20.scaffold48962_1	Ambiguous	4
V1.UC-19.scaffold73162_1	Ambiguous	2
O2.UC-4.scaffold30519_1	Ambiguous	14
MH0057.scaffold10072_3	Ambiguous	7
O2.UC-22.scaffold84785_1	Ambiguous	2
V1.UC-18.scaffold23434_11	Ambiguous	2
MH0016.scaffold1154_5	Ambiguous	7
V1.UC-10.scaffold77653_2	Ambiguous	12
MH0038.scaffold30542_2	Ambiguous	2
MH0053.scaffold54386_1	Ambiguous	8
MH0006.scaffold52913_1	Ambiguous	4
V1.CD-8.scaffold37174_1	Ambiguous	6
MH0066.scaffold3338_6	Ambiguous	5
V1.UC-14.scaffold56426_2	Ambiguous	3
MH0001.scaffold21829_1	Ambiguous	11
MH0020.scaffold2645_1	Ambiguous	4
O2.UC-22.scaffold1175_6	Ambiguous	18
O2.UC-24.scaffold47867_6	Ambiguous	4
MH0080.scaffold77706_1	Ambiguous	8
MH0026.scaffold24863_3	Ambiguous	4
O2.UC-18.scaffold192_7	Ambiguous	8
MH0012.scaffold70610_3	Ambiguous	3
MH0011.scaffold941_4	Ambiguous	5
V1.CD-8.scaffold2195_1	Ambiguous	6
MH0008.scaffold54629_1	Ambiguous	11
MH0006.scaffold319392_1	Ambiguous	7
MH0028.scaffold7268_2	Ambiguous	5
O2.UC-1.scaffold15189_1	Ambiguous	4
MH0042.scaffold13955_5	Ambiguous	2
MH0084.scaffold6207_4	Ambiguous	7
MH0074.scaffold1136_4	Ambiguous	15
MH0077.scaffold55219_7	Ambiguous	4
V1.UC-10.scaffold30222_3	Ambiguous	5
MH0067.scaffold39892_5	Ambiguous	10
MH0049.scaffold6358_2	Ambiguous	3
MH0070.scaffold71140_1	Ambiguous	8
MH0053.scaffold75965_2	Ambiguous	10
MH0086.scaffold6468_6	Ambiguous	12
MH0037.scaffold3994_1	Ambiguous	4
V1.UC-19.scaffold9408_3	Ambiguous	5
MH0039.scaffold21727_1	Ambiguous	7
MH0005.scaffold1869_5	Ambiguous	3
MH0016.scaffold6785_6	Ambiguous	9
MH0013.C1643781_1	Ambiguous	4
MH0037.scaffold5827_2	Ambiguous	9
V1.UC-18.scaffold48715_1	Ambiguous	9
V1.CD-6.scaffold52836_2	Ambiguous	2
MH0068.scaffold25493_1	Ambiguous	12
O2.UC-11.scaffold3901_2	Ambiguous	3
V1.CD-11.scaffold2236_8	Ambiguous	3
V1.CD-15.scaffold16275_1	Ambiguous	10
MH0061.scaffold1213_21	Ambiguous	2
MH0039.scaffold36657_6	Ambiguous	2
MH0039.scaffold73819_3	Ambiguous	4
V1.UC-14.scaffold20889_9	Ambiguous	10
MH0041.scaffold11898_1	Ambiguous	10
MH0042.scaffold16361_1	Ambiguous	4
MH0059.scaffold73615_1	Ambiguous	7
MH0033.scaffold34762_1	Ambiguous	11
V1.UC-15.scaffold2638_13	Ambiguous	10
MH0083.scaffold34067_2	Ambiguous	16
V1.UC-10.scaffold5305_5	Ambiguous	4
MH0037.scaffold27675_8	Ambiguous	6
MH0067.scaffold103_9	Ambiguous	10
MH0020.scaffold10958_1	Ambiguous	2
MH0003.scaffold16911_8	Ambiguous	5
V1.CD-3.scaffold2617_3	Ambiguous	2
MH0067.scaffold2563_5	Ambiguous	4
MH0028.scaffold16301_5	Ambiguous	3
MH0055.scaffold1470_3	Ambiguous	12
V1.UC-13.scaffold64315_4	Ambiguous	5
MH0073.scaffold2970_10	Ambiguous	4
V1.UC-10.scaffold36768_1	Ambiguous	5
V1.CD-9.scaffold16766_5	Ambiguous	11
MH0059.scaffold3759_4	Ambiguous	3
MH0026.scaffold47503_3	Ambiguous	5
V1.UC-15.scaffold1548_9	Ambiguous	16
MH0041.scaffold15118_1	Ambiguous	3
MH0018.scaffold22251_2	Ambiguous	4
V1.UC-13.scaffold27937_1	Ambiguous	6
MH0068.scaffold17211_1	Ambiguous	10
MH0032.scaffold47022_1	Ambiguous	3
MH0044.scaffold12287_6	Ambiguous	4
MH0002.scaffold15351_1	Ambiguous	17
V1.CD-9.scaffold57847_1	Ambiguous	3
MH0072.scaffold24971_15	Ambiguous	2
MH0082.scaffold18170_5	Ambiguous	11
MH0067.scaffold274_4	Ambiguous	4
MH0067.scaffold4486_1	Ambiguous	2
MH0065.scaffold53251_2	Ambiguous	7
MH0064.scaffold27532_2	Ambiguous	14
V1.UC-14.scaffold18565_6	Ambiguous	4
MH0069.scaffold49879_1	Ambiguous	9
V1.CD-14.scaffold95730_2	Ambiguous	3
V1.UC-17.scaffold22483_1	Ambiguous	9
V1.CD-1.scaffold1936_1	Ambiguous	8
MH0067.scaffold10776_2	Ambiguous	8
MH0009.scaffold25764_2	Ambiguous	5
V1.UC-10.scaffold92009_1	Ambiguous	9
MH0012.scaffold22698_1	Ambiguous	22
MH0054.scaffold82112_1	Ambiguous	3
MH0045.scaffold16782_15	Ambiguous	6
MH0044.scaffold6458_1	Ambiguous	3
MH0003.scaffold13641_2	Ambiguous	2
MH0026.scaffold47727_2	Ambiguous	6
O2.UC-17.scaffold3853_2	Ambiguous	8
MH0049.scaffold15494_2	Ambiguous	3
MH0059.scaffold68519_1	Ambiguous	4
MH0040.scaffold11546_1	Ambiguous	11
V1.CD-15.scaffold235_2	Ambiguous	16
V1.UC-8.scaffold24810_2	Ambiguous	4
V1.CD-11.scaffold13598_3	Ambiguous	3
V1.CD-4.scaffold70383_4	Ambiguous	11
V1.UC-14.scaffold28509_2	Ambiguous	4
V1.UC-13.scaffold18715_1	Ambiguous	11
MH0046.scaffold81508_2	Ambiguous	15
MH0009.scaffold2868_2	Ambiguous	3
MH0054.scaffold943_20	Ambiguous	7
MH0030.scaffold125_3	Ambiguous	5
MH0066.scaffold11464_17	Ambiguous	8
V1.CD-1.scaffold16875_2	Ambiguous	7
V1.CD-3.scaffold7292_3	Ambiguous	7
MH0025.scaffold105015_1	Ambiguous	2
V1.CD-8.scaffold98938_1	Ambiguous	4
MH0072.scaffold45909_1	Ambiguous	7
V1.UC-9.scaffold25497_1	Ambiguous	4
O2.UC-19.scaffold74061_5	Ambiguous	7
V1.UC-7.scaffold51867_1	Ambiguous	4
O2.UC-24.scaffold20350_2	Ambiguous	3
V1.CD-14.scaffold86860_3	Ambiguous	5
V1.CD-3.scaffold4503_4	Ambiguous	6
V1.UC-19.scaffold12688_2	Ambiguous	2
MH0025.scaffold7631_2	Ambiguous	4
V1.CD-11.scaffold552_19	Ambiguous	5
MH0077.scaffold9837_7	Ambiguous	4
V1.UC-6.scaffold90345_1	Corticoviridae	1
MH0042.scaffold29538_1	Mimiviridae	1
MH0009.scaffold2599_1	Mimiviridae	2
MH0032.scaffold47022_8	Myoviridae	1
V1.UC-8.scaffold20814_9	Myoviridae	1
MH0032.scaffold11044_2	Myoviridae	4
O2.UC-20.scaffold15641_5	Myoviridae	1
MH0001.scaffold17887_2	Myoviridae	1
O2.UC-20.scaffold31939_2	Myoviridae	11
MH0044.scaffold19488_2	Myoviridae	7
O2.UC-19.scaffold2500_4	Myoviridae	1
V1.CD-9.scaffold75967_2	Myoviridae	1
MH0038.scaffold1737_1	Myoviridae	2
O2.UC-16.scaffold997_3	Myoviridae	1
MH0067.scaffold17529_1	Myoviridae	1
V1.UC-9.scaffold24720_7	Myoviridae	1
MH0045.scaffold7081_3	Myoviridae	3
MH0026.scaffold2466_2	Myoviridae	1
MH0086.scaffold98531_1	Myoviridae	4
MH0068.scaffold29877_2	Myoviridae	7
MH0062.scaffold93325_1	Myoviridae	5
MH0069.scaffold6760_3	Myoviridae	6
V1.UC-9.scaffold53145_2	Myoviridae	5
MH0014.scaffold4708_1	Myoviridae	8
MH0064.scaffold78389_1	Myoviridae	1
MH0012.scaffold87237_1	Myoviridae	1
MH0038.scaffold42496_9	Myoviridae	1
MH0060.scaffold109427_3	Myoviridae	3
MH0026.scaffold19495_2	Myoviridae	15
V1.UC-10.scaffold846_26	Myoviridae	1
V1.CD-8.scaffold54441_1	Myoviridae	1
MH0045.scaffold15276_3	Myoviridae	7
MH0085.scaffold37908_6	Myoviridae	5
MH0059.scaffold34095_2	Myoviridae	4
MH0080.scaffold99874_1	Myoviridae	1
V1.UC-15.scaffold14129_1	Myoviridae	1
MH0034.scaffold15675_2	Myoviridae	3
O2.UC-19.scaffold13428_4	Myoviridae	1
MH0010.C1326456_1	Phycodnaviridae	1
O2.UC-11.scaffold2084_4	Phycodnaviridae	2
MH0073.scaffold5966_4	Phycodnaviridae	1
MH0012.scaffold8450_1	Phycodnaviridae	1
O2.UC-20.scaffold38526_3	Phycodnaviridae	1
MH0034.scaffold1101_2	Phycodnaviridae	1
MH0084.scaffold4682_1	Phycodnaviridae	2
MH0066.scaffold15047_1	Phycodnaviridae	2
V1.CD-9.scaffold18211_2	Phycodnaviridae	1
V1.CD-8.scaffold111064_3	Podoviridae	6
MH0067.scaffold17093_3	Podoviridae	1
V1.UC-13.scaffold68408_2	Podoviridae	6
MH0055.scaffold7306_1	Podoviridae	1
MH0062.scaffold93278_1	Podoviridae	5
O2.UC-24.scaffold64845_1	Podoviridae	4
MH0080.scaffold99053_1	Podoviridae	1
MH0080.scaffold99422_1	Podoviridae	1
MH0055.scaffold24912_2	Podoviridae	1
V1.UC-19.scaffold80970_4	Podoviridae	2
O2.UC-1.scaffold3798_4	Podoviridae	2
V1.UC-18.scaffold46676_2	Podoviridae	6
V1.UC-19.scaffold16581_5	Podoviridae	3
MH0067.scaffold50515_1	Podoviridae	3
MH0030.scaffold61572_2	Podoviridae	6
MH0016.scaffold27181_3	Podoviridae	5
MH0071.scaffold19890_2	Podoviridae	1
MH0058.scaffold109525_1	Podoviridae	3
V1.UC-10.scaffold1445_7	Podoviridae	1
MH0006.scaffold89117_1	Podoviridae	6
MH0044.scaffold4626_2	Siphoviridae	1
MH0073.scaffold33276_3	Siphoviridae	1
V1.UC-19.scaffold2480_6	Siphoviridae	6
MH0060.scaffold71598_3	Siphoviridae	4
MH0014.scaffold72074_1	Siphoviridae	9
MH0086.scaffold103753_5	Siphoviridae	1
MH0074.scaffold6139_1	Siphoviridae	1
V1.CD-13.scaffold99945_1	Siphoviridae	7
MH0083.scaffold14109_3	Siphoviridae	4
MH0009.scaffold32655_3	Siphoviridae	4
V1.UC-18.scaffold35335_2	Siphoviridae	2
V1.UC-9.scaffold26453_1	Siphoviridae	3
MH0040.scaffold104579_1	Siphoviridae	2
MH0063.scaffold5042_4	Siphoviridae	6
MH0069.scaffold813_1	Siphoviridae	5
MH0012.scaffold55294_1	Siphoviridae	2
MH0044.scaffold50832_2	Siphoviridae	1
V1.CD-11.scaffold7912_3	Siphoviridae	5
MH0085.scaffold14272_1	Siphoviridae	5
MH0066.scaffold7359_7	Siphoviridae	5
V1.UC-10.scaffold18635_2	Siphoviridae	4
MH0006.scaffold52913_3	Siphoviridae	2
MH0014.scaffold29821_4	Siphoviridae	3
V1.CD-3.scaffold42804_3	Siphoviridae	4
MH0086.scaffold36990_8	Siphoviridae	5
MH0006.scaffold212103_1	Siphoviridae	7
MH0037.scaffold33786_1	Siphoviridae	3
MH0053.scaffold90432_7	Siphoviridae	5
MH0058.scaffold19676_1	Siphoviridae	6
V1.UC-10.scaffold8015_1	Siphoviridae	5
V1.CD-15.scaffold13246_1	Siphoviridae	4
MH0043.scaffold42498_1	Siphoviridae	5
MH0076.scaffold72259_1	Siphoviridae	2
MH0040.scaffold35825_2	Siphoviridae	3
MH0042.scaffold21573_1	Siphoviridae	6
MH0056.scaffold6096_2	Siphoviridae	1
MH0014.scaffold92154_2	Siphoviridae	3
V1.UC-14.scaffold56426_1	Siphoviridae	3
MH0067.scaffold6234_5	Siphoviridae	9
MH0009.scaffold101182_2	Siphoviridae	2
MH0032.scaffold1671_6	Siphoviridae	1
MH0011.scaffold25565_3	Siphoviridae	3
V1.UC-10.scaffold8350_1	Siphoviridae	2
MH0035.scaffold678_1	Siphoviridae	6
MH0081.scaffold82724_1	Siphoviridae	3
MH0012.scaffold82217_2	Siphoviridae	4
MH0028.scaffold49524_6	Siphoviridae	2
MH0044.scaffold55618_2	Siphoviridae	4
V1.CD-6.scaffold75958_3	Siphoviridae	2
MH0012.scaffold79530_3	Siphoviridae	2
O2.UC-17.scaffold13561_3	Siphoviridae	4
MH0074.scaffold9085_2	Siphoviridae	4
MH0054.scaffold67824_4	Siphoviridae	6
V1.UC-6.scaffold13939_5	Siphoviridae	5
O2.UC-19.scaffold74061_3	Siphoviridae	3
MH0062.scaffold87339_1	Siphoviridae	2
MH0033.scaffold47178_1	Siphoviridae	5
MH0055.scaffold17878_4	Siphoviridae	5
V1.UC-19.scaffold13401_1	Siphoviridae	1
MH0083.scaffold76915_2	Siphoviridae	2
MH0086.scaffold89372_3	Siphoviridae	3
MH0061.scaffold9020_1	Siphoviridae	8
MH0070.scaffold106111_2	Siphoviridae	2
MH0036.scaffold89379_1	Siphoviridae	3
V1.CD-1.scaffold26204_5	Siphoviridae	5
V1.CD-9.scaffold57847_3	Siphoviridae	1
MH0048.scaffold5212_1	Siphoviridae	2
MH0072.scaffold4659_4	Siphoviridae	1
MH0053.scaffold52989_1	Siphoviridae	1
V1.CD-8.scaffold27898_2	Siphoviridae	4
V1.UC-9.scaffold4248_1	Siphoviridae	2
MH0061.scaffold1213_19	Siphoviridae	3
MH0026.scaffold22321_3	Siphoviridae	4
MH0054.scaffold3636_5	Siphoviridae	6
MH0012.scaffold2352_4	Siphoviridae	3
MH0006.scaffold203059_1	Siphoviridae	3
V1.CD-11.scaffold13156_4	Siphoviridae	6
V1.UC-19.scaffold19758_4	Siphoviridae	1
V1.CD-1.scaffold240_3	Siphoviridae	4
MH0045.scaffold13359_4	Siphoviridae	1
V1.UC-10.scaffold3416_3	Siphoviridae	3
MH0009.scaffold1880_3	Siphoviridae	5
MH0003.scaffold2927_1	Siphoviridae	3
MH0055.scaffold38308_2	Siphoviridae	1
V1.CD-12.scaffold32246_1	Siphoviridae	4
V1.UC-14.scaffold89243_1	Siphoviridae	1
MH0064.scaffold7764_3	Siphoviridae	2
MH0045.scaffold18909_2	Siphoviridae	2
MH0061.scaffold15589_6	Siphoviridae	2
MH0075.scaffold95771_1	Siphoviridae	2
MH0006.scaffold97164_10	Siphoviridae	4
V1.UC-9.scaffold793_10	Siphoviridae	1
MH0056.scaffold21295_1	Siphoviridae	2
O2.UC-20.scaffold85296_1	Siphoviridae	5
MH0072.scaffold4659_5	Siphoviridae	3
V1.UC-15.scaffold508_1	Siphoviridae	1
O2.UC-1.scaffold16664_3	Siphoviridae	4
MH0034.scaffold5199_5	Siphoviridae	2
O2.UC-22.scaffold43274_1	Siphoviridae	3
MH0009.scaffold32249_2	Siphoviridae	2
MH0016.scaffold1154_6	Siphoviridae	2
MH0073.scaffold77928_1	Siphoviridae	1
O2.UC-20.scaffold86151_1	Siphoviridae	3
O2.UC-13.scaffold6592_1	Siphoviridae	1
MH0016.scaffold21089_1	Siphoviridae	2
MH0069.scaffold53039_2	Siphoviridae	3
O2.UC-22.scaffold5748_1	Siphoviridae	1
MH0074.scaffold91_8	Siphoviridae	4
MH0083.scaffold34297_11	Siphoviridae	3
V1.UC-15.scaffold3728_1	Siphoviridae	6
MH0070.scaffold113544_1	Siphoviridae	2
V1.CD-11.scaffold42319_5	Siphoviridae	1
V1.UC-18.scaffold28186_6	Siphoviridae	2
MH0039.scaffold84780_1	Siphoviridae	2
MH0037.scaffold4756_2	Siphoviridae	2
MH0061.scaffold39521_3	Siphoviridae	3
MH0030.scaffold29447_1	Siphoviridae	2
V1.CD-13.scaffold34473_9	Siphoviridae	6
MH0060.scaffold109138_1	Siphoviridae	1
MH0033.scaffold60474_1	Siphoviridae	2
MH0031.scaffold334_19	Siphoviridae	5
V1.CD-3.scaffold10648_4	Siphoviridae	6
MH0037.scaffold76389_1	Siphoviridae	1
MH0028.scaffold22329_3	Siphoviridae	2
V1.CD-1.scaffold22027_2	Siphoviridae	3
MH0064.scaffold27658_4	Siphoviridae	6
MH0034.scaffold5199_4	Siphoviridae	1
MH0045.scaffold24934_1	Siphoviridae	3
O2.UC-22.scaffold73624_1	Siphoviridae	1
V1.CD-9.scaffold57847_2	Siphoviridae	1
MH0042.scaffold31955_3	Siphoviridae	4
MH0014.scaffold55358_2	Siphoviridae	1
MH0071.scaffold19851_6	Siphoviridae	3
MH0014.scaffold79710_1	Siphoviridae	2
O2.UC-1.scaffold6710_1	Siphoviridae	8
MH0083.scaffold1988_10	Siphoviridae	4
V1.CD-15.scaffold43689_1	Siphoviridae	3
V1.CD-14.scaffold3435_1	Siphoviridae	5
MH0060.scaffold53973_1	Siphoviridae	8
MH0015.scaffold62095_2	Siphoviridae	4
V1.UC-9.scaffold26453_2	Siphoviridae	9
V1.CD-3.scaffold5188_1	Siphoviridae	4
MH0068.scaffold14290_2	Siphoviridae	9
MH0041.scaffold10949_3	Siphoviridae	8
V1.CD-3.scaffold2667_1	Siphoviridae	4
MH0014.scaffold22267_8	Siphoviridae	3
MH0053.scaffold100213_1	Siphoviridae	5
MH0035.scaffold97143_1	Siphoviridae	3
O2.UC-18.scaffold886_6	Siphoviridae	3
O2.UC-4.scaffold13796_2	Siphoviridae	4
O2.UC-12.scaffold35713_1	Siphoviridae	6
MH0055.scaffold60207_1	Siphoviridae	3
MH0037.scaffold27675_1	Siphoviridae	7
MH0008.scaffold28000_1	Siphoviridae	9
O2.UC-12.scaffold10256_1	Siphoviridae	1
O2.UC-12.scaffold42018_1	Siphoviridae	6
MH0077.scaffold11143_2	Siphoviridae	5
MH0056.scaffold62392_1	Siphoviridae	3
V1.UC-14.scaffold18033_3	Siphoviridae	2
MH0023.scaffold21799_1	Siphoviridae	4
MH0055.scaffold38308_1	Siphoviridae	3
MH0012.scaffold4664_4	Siphoviridae	1
MH0083.scaffold5877_2	Siphoviridae	4
MH0006.scaffold67889_3	Siphoviridae	3
MH0023.C1325984_1	Siphoviridae	2
MH0035.scaffold93254_1	Siphoviridae	2
V1.UC-7.scaffold4461_2	Siphoviridae	10
V1.CD-3.scaffold63950_3	Siphoviridae	3
O2.UC-17.scaffold8547_2	Siphoviridae	6
V1.CD-14.scaffold15156_1	Siphoviridae	2
MH0086.scaffold6468_4	Siphoviridae	6
MH0014.scaffold10101_1	Siphoviridae	3
MH0035.scaffold15127_1	Siphoviridae	4
MH0041.scaffold20586_6	Siphoviridae	8
V1.UC-19.scaffold2480_4	Siphoviridae	3
V1.UC-17.scaffold71199_5	Siphoviridae	1
MH0012.scaffold82217_3	Siphoviridae	3
MH0030.scaffold24230_2	Siphoviridae	5
MH0077.scaffold2466_21	Siphoviridae	1
V1.UC-18.scaffold67224_2	Siphoviridae	1
MH0001.scaffold6445_6	Siphoviridae	3
MH0075.scaffold651_17	Siphoviridae	4
MH0077.scaffold35530_1	Siphoviridae	11
V1.CD-15.scaffold21705_1	Siphoviridae	3
MH0037.scaffold79471_1	Siphoviridae	1
MH0004.scaffold52925_2	Siphoviridae	1
O2.UC-13.scaffold12808_1	Siphoviridae	9
MH0077.scaffold98997_2	Siphoviridae	2
V1.CD-11.scaffold750_3	Siphoviridae	6
O2.UC-13.scaffold2488_1	Siphoviridae	1
MH0043.scaffold13467_5	Siphoviridae	3
V1.UC-21.scaffold11059_3	Siphoviridae	1
MH0086.scaffold13209_4	Siphoviridae	3
MH0070.scaffold41858_1	Siphoviridae	5
MH0043.scaffold34359_4	Siphoviridae	4
MH0014.scaffold29865_1	Siphoviridae	3
MH0075.scaffold91179_3	Siphoviridae	2
MH0062.scaffold21026_1	Siphoviridae	2
V1.CD-12.scaffold15316_2	Siphoviridae	4
MH0067.scaffold5913_1	Siphoviridae	2
O2.UC-17.scaffold13561_1	Siphoviridae	3
MH0003.scaffold13641_1	Siphoviridae	1
V1.CD-13.scaffold29817_5	Siphoviridae	1
V1.CD-15.scaffold1750_1	Siphoviridae	1
MH0049.scaffold29324_1	Siphoviridae	4
MH0009.scaffold3323_3	Siphoviridae	3
O2.UC-13.scaffold31021_2	Siphoviridae	9
MH0013.scaffold31594_1	Siphoviridae	5
MH0070.scaffold43828_1	Siphoviridae	1
MH0081.scaffold4257_3	Siphoviridae	4
V1.UC-10.scaffold10347_2	Siphoviridae	3
V1.UC-14.scaffold13017_6	Siphoviridae	1
MH0084.scaffold7764_3	Siphoviridae	1
MH0053.scaffold12089_1	Siphoviridae	2
MH0084.scaffold51456_1	Siphoviridae	10
MH0035.scaffold5110_1	Siphoviridae	1
MH0035.scaffold95655_1	Siphoviridae	2
V1.UC-21.scaffold7256_4	Siphoviridae	5
MH0044.scaffold50832_1	Siphoviridae	4
MH0069.scaffold9799_4	Siphoviridae	2
V1.CD-6.scaffold42435_2	Siphoviridae	1
V1.UC-14.scaffold71012_1	Siphoviridae	5
V1.CD-11.scaffold9648_3	Siphoviridae	2
V1.UC-8.scaffold96492_1	Siphoviridae	2
MH0003.scaffold595_5	Siphoviridae	2
O2.UC-14.scaffold879_14	Siphoviridae	2
MH0012.scaffold174373_1	Siphoviridae	3
V1.UC-8.scaffold19258_4	Siphoviridae	1
MH0075.scaffold95202_1	Siphoviridae	4
MH0037.scaffold46033_2	Siphoviridae	1
O2.UC-19.scaffold72794_7	Siphoviridae	4
MH0044.scaffold55618_1	Siphoviridae	2
MH0012.scaffold173320_1	Siphoviridae	2
V1.CD-11.scaffold552_17	Siphoviridae	1
V1.UC-18.scaffold11932_8	Siphoviridae	8
V1.CD-14.scaffold45276_5	Siphoviridae	1
V1.CD-6.scaffold52836_1	Siphoviridae	3
