# Supplementary material for: CRISPR targeting reveals a reservoir of common phages associated with the human gut microbiome
Source: HighWire-hosted journal article supplement (doi:10.1101/gr.138297.112), 2012-06-25
Supplement: Stern_DatasetS6.xlsx [file Stern_DatasetS6.xlsx]

## Sheet: coverage_table
seed	length	Num spacers matching	Num MetaHIT samples with spacers matching	Host by CRISPR	Host by lysogeny	Presence in Reyes et al VLP dataset	Presence in Minot et al VLP dataset	Presence in Kurokawa et al metagenomic dataset	Num MetaHIT samples in which contig exists	MH0001	MH0002	MH0003	MH0004	MH0005	MH0006	MH0007	MH0008	MH0009	MH0010	MH0011	MH0012	MH0013	MH0014	MH0015	MH0016	MH0017	MH0018	MH0019	MH0020	MH0021	MH0022	MH0023	MH0024	MH0025	MH0026	MH0027	MH0028	MH0030	MH0031	MH0032	MH0033	MH0034	MH0035	MH0036	MH0037	MH0038	MH0039	MH0040	MH0041
MH0001.scaffold17887_2	25183	2	2			0	0	0	1	13.9657	0	0	0	0	0	0	0	0	0	0	0	0	0	0	0	0	0	0	0	0	0	0	0	0	0	0	0	0	0	0	0	0	0	0	0	0	0	0	0
MH0001.scaffold21829_1	26477	30	24			0	1	0	38	13.0116	0	0	0	0	1.01639	1.86825	0	0	5.69648	0.628231	0.175724	0	3.23601	0	1.96199	6.07219	0	1.17414	0	8.30323	2.56486	0	0	0	0	1.5792	0	1.19484	0.933126	0	3.93721	0	0	0.854255	0	0.527758	0	0	1.70847
MH0001.scaffold6445_6	27228	46	29			0	0	0	34	9.89831	0	0	1.92271	0	0	2.60475	2.29306	2.91313	0	0	0	0	0	0	1.64376	6.17798	0	0	0	0	0	0	24.0362	0	0	0	2.0712	0	0	0	0	1.12654	0	2.29299	4.63518	0	0	0	0
MH0002.scaffold12413_1	31646	47	12			0	1	0	27	0	5.48963	2.89628	1.82939	1.68748	1.03187	6.74676	0	2.05222	0	0	9.632	0	0.623336	0	0	0	0	0	0	0	0	0	0	0.797951	0	0	5.84244	0	0.716393	1.72297	1.60679	0	0	0	0	2.31939	3.15757	0	0
MH0002.scaffold15351_1	69550	4	1			0	0	0	3	0	4.56423	0	0	0	0	0	0	0	0	0	0	0	0	0	0	0	0	0	0	0	0	0	0	0	0	0	0	0	0	0	0	0	0	0	0	0	0	0	0
MH0002.scaffold37810_2	34857	1	1			0	0	0	7	0	6.3555	0	0	0	0	0	11.4559	0	0	0	0	0	47.1593	0	0	0	0	0	0	0	0	0	0	0	0	6.69506	0	0	2.01404	0	0	0	0	0	0	0	0	0	0
MH0002.scaffold90898_2	11459	7	5			0	0	0	2	0	5.26091	0	0	0	0	0	0	0	0	0	0	12.7951	0	0	0	0	0	0	0	0	0	0	0	0	0	0	0	0	0	0	0	0	0	0	0	0	0	0	0
MH0003.scaffold13641_1	32481	18	15			0	0	0	1	0	0	8.7974	0	0	0	0	0	0	0	0	0	0	0	0	0	0	0	0	0	0	0	0	0	0	0	0	0	0	0	0	0	0	0	0	0	0	0	0	0
MH0003.scaffold13641_2	17521	1	1			0	1	0	3	0	0	7.78567	0	0	0	0	0	0	0	0	0	0	0	0	0.668348	0	0	0	0	0	0	0	0	0	0	0	0	0	0	0	0	0	0	0	0	0	0	0	0
MH0003.scaffold16911_8	18186	18	14			0	0	0	43	0	0	3.54369	0	0	0.192165	0	0	1.78349	0	1.92414	0.809999	0	0	6.94919	0	1.66033	0	0	0	0	1.9382	0	1.15602	0.386706	1.06022	0	0	1.03514	0.430939	0	0	0	1.1166	0	0	0	0	0	0
MH0003.scaffold27139_4	12057	2	2			0	0	0	14	0	1.39011	4.69397	0	0	0	0	0	0	0	0	0	0	0	0	0	0	0	0	0	0	0	0	0	0	0	0	0.47927	0	0	0	0	0	0	2.64788	0	0	0.703466	0	0
MH0003.scaffold2927_1	10660	2	2			0	0	0	9	0	0	6.97419	0.747754	0	0	0	0	0	0	0.464986	0	0	0	1.62071	0.305844	0	0	0	0	0	0	0	0	0	0	0	0	0	0	0	0	0	0	0	0	0	0	0	0
MH0003.scaffold323_1	25788	2	2			0	0	0	7	0	1.71188	7.79854	0	0	0	0	0	0	0	0	0	0	0	0	0	0	0	0	0	0	0	0	0	0	0	0	0	0	0	1.25213	0	0	0	1.31522	0	0	0	0	0
MH0003.scaffold3832_3	27290	2	2			0	0	0	44	0	2.45582	9.75353	0	0	4.1379	0	0	1.28514	0	0.781956	0.384214	0.802239	0.860017	0	0	0	0	0	0.881725	1.88535	2.443	0	0	1.14929	1.60459	0	2.71944	0.602306	0.858089	0	0	0	0	0.410014	0	1.47814	1.29317	0	0
MH0003.scaffold39547_2	39349	37	24			0	1	0	20	0	0	5.74869	0	0	0	0	0	0	18.3109	0	0.741802	0	0	24.3926	0	0	0	0	0	0	0	0	0	0	0	0	3.22699	0	0	0	0	0	0	0	5.51529	0	2.69756	0	0
MH0003.scaffold39547_6	15841	15	13			0	1	0	13	0	0	4.7988	0	0	0	0	0	0	11.8122	0	0	0	0	13.0598	0	0	0	0	0	0	0	0	0	0	0	0	1.69262	0	0	0	0	0	0	0	3.74217	0	1.68636	0	0
MH0003.scaffold595_5	13154	1	1		Bacteroides_sp._2_1_7	0	0	0	10	0	0	4.32081	0	0	0	0	0	0	0	0	0	0	0	0	0.483782	0	0	0	0	2.52499	0	0	0	0	0	0	1.54917	0.734864	0	0	0	0	0	0	0	0	0	0	0
MH0003.scaffold76100_1	28717	21	13		Bacteroides_sp._2_2_4	1	1	1	68	2.45519	0	7.65945	1.0943	0	0	17.386	15.7689	3.01352	0	1.05573	0	5.05537	12.7304	21.7972	0	0	0	0	0	0	1.20711	2.35793	0	0	23.7972	13.325	17.7797	0	1.21082	0	8.19295	0	0	0	0	19.4612	2.65156	11.8711	25.8113
MH0003.scaffold76844_1	17554	1	1			0	0	0	1	0	0	5.87798	0	0	0	0	0	0	0	0	0	0	0	0	0	0	0	0	0	0	0	0	0	0	0	0	0	0	0	0	0	0	0	0	0	0	0	0	0
MH0004.scaffold31758_4	12077	1	1			0	1	0	5	0	0	0	15.0623	0	10.0409	0	0	9.50961	0	0	0	0	0	0	0	0	0	0	0	0	0	0	0	0	0	0	0	0	5.53449	0	0	0	0	0	0	0	0	0	0
MH0004.scaffold52925_2	16100	1	1			1	1	0	1	0	0	0	14.9021	0	0	0	0	0	0	0	0	0	0	0	0	0	0	0	0	0	0	0	0	0	0	0	0	0	0	0	0	0	0	0	0	0	0	0	0
MH0005.scaffold1869_5	21575	3	3		Butyrivibrio_crossotus_DSM_2876	0	0	0	2	0	0	0	0	13.6123	0	0	0	0	0	0	0	0	0	0	0	0	0	0	0	0	0	0	0	0	0	0	0	0	0	0	0	0	0	0	0	0	0	0	0
MH0005.scaffold6906_3	10828	1	1			0	0	0	1	0	0	0	0	9.03991	0	0	0	0	0	0	0	0	0	0	0	0	0	0	0	0	0	0	0	0	0	0	0	0	0	0	0	0	0	0	0	0	0	0	0
MH0006.scaffold1166_11	20064	3	2			0	0	0	2	0	0	0	0	0	1.06883	0	0	0	0	0	0	0	0	2.59929	0	0	0	0	0	0	0	0	0	0	0	0	0	0	0	0	0	0	0	0	0	0	0	0	0
MH0006.scaffold134601_2	14380	12	10			0	0	0	17	0	0	3.81885	0	0	2.1396	0	0	0	0	0	0	0	1.44723	0	0	0	0	0	0	0	0	0	0	0	0	0	0	0.734931	0	0	0	0	0	0	0	1.84967	0	0	0
MH0006.scaffold203059_1	11706	5	3			0	0	0	1	0	0	0	0	0	1.30159	0	0	0	0	0	0	0	0	0	0	0	0	0	0	0	0	0	0	0	0	0	0	0	0	0	0	0	0	0	0	0	0	0	0
MH0006.scaffold212103_1	13146	7	5			0	0	0	6	0	0	0	0	0	5.47332	0	0	0	0	0	0	0	0	0	0	0	0	0	0	0	0	1.38253	0	0	0	4.72408	0	0	0	0	0	0	0	3.78818	0	12.5978	0	0	0
MH0006.scaffold245228_4	10069	1	1			0	0	0	2	0	0	0	0	0	0.935985	0	0	0	0	0	0	0	0	0	0	0	0	0	0	0	0	0	0	0	0	0	0	0	0	0	0	0.962739	0	0	0	0	0	0	0
MH0006.scaffold251615_1	43188	19	13			0	0	0	4	0	0	0	0	0	1.98722	0	0	0	0	0	0	0	0	0	0	0	0	0	0	0	0	0	0	0	0	0	0	0	0	0	0	0	0	0	11.0365	0	0	0	0
MH0006.scaffold313732_3	10751	3	3			0	1	0	16	0	0	0	0	0	0.991636	4.39733	0	0	1.10999	0	0.314121	0	0	0	0	0	0	0	0	0	0	0	0	0	0	1.91522	0	0	0.356121	0.935219	0	0	1.44969	0	0	0	0	0.680547	0
MH0006.scaffold319392_1	15239	1	1			0	0	0	19	0.606443	0	0.623104	0	0	3.19604	5.02324	0	0	0	1.05461	0.284647	0	0	0	0	0.838157	0	0	1.72809	0	0	0	0	1.7282	0	0	0	0	0	0	1.44399	0	0	0	0	0	0	0	0
MH0006.scaffold320135_1	16900	10	6			1	0	0	23	0	0	0	6.92655	0	1.79191	0	0	0	0	0	0.419967	0	0	0	0	0	0	0	0	0	4.04785	0	0	0	0	0	0	0	0	0	2.95293	0	18.5671	0	0	0.963878	0	0	0
MH0006.scaffold52913_1	14429	18	6			0	0	0	5	0	0	0	0	0	1.18778	0	0	0	0	0	0	0	0	0	0	0	0	0	0	0	0	0	0	0	0	0	0	0	0	0	0	0	0	0	0	0	0	0	0
MH0006.scaffold52913_3	12854	21	13			0	0	0	4	0	0	0	0	0	1.44417	0	0	0	0	0	0	0	0	0	0	0	0	0	0	0	0	0	0	0	0	0	0	0	0	0	0	0	0	0	0	0	0	0	0
MH0006.scaffold58134_1	11584	41	20			0	1	0	1	0	0	0	0	0	2.40689	0	0	0	0	0	0	0	0	0	0	0	0	0	0	0	0	0	0	0	0	0	0	0	0	0	0	0	0	0	0	0	0	0	0
MH0006.scaffold67889_3	10683	1	1			0	0	0	2	0	0	0	0	0	1.09414	0	0	0	0	0	0	0	0	0	0	0	0	0	0	0	0	0	0	0	0	0	0	0	0	0	0	0	0	0	0	0	0	0	0
MH0006.scaffold87784_2	46058	7	5			1	1	0	33	2.40222	20.6358	1.06336	0	0	1.70259	0	0	0	0	0	0	9.73922	5.93891	16.7705	0	0	0	0	0	0	0	0	0	0	0	6.67344	0	0	0	0	0	0.702458	0	0	0	3.55718	2.54416	0	0
MH0006.scaffold89117_1	15510	2	2			0	0	0	2	0	0	0	0	0	1.98113	0	0	0	0	0	0	0	0	0	0	0	0	0	0	0	0	0	0	0	0	0	0	0	0	0	0	0	0	0	0	0	0	0	0
MH0006.scaffold91343_1	21740	2	2			0	0	0	40	0	2.06417	0	1.89568	0	2.80528	0	0	1.68186	0	0.405418	0.63986	0	1.61459	5.6893	0	1.39063	0	0	0	0	0	0	0.5883	3.8259	0	0	0	0	0	0	0.972012	0	0	0.585801	0	0.694449	0	1.63043	0
MH0006.scaffold97164_10	15079	1	1			0	0	0	3	0	0	0	0	0	1.66415	0	0	0	0	0	0	0	0	0	0	0	0	0	0	0	0	0	0	0	0	0	0	0.712783	0	0	0	0	0	0	0	0	0	0	0
MH0008.scaffold28000_1	35130	69	39			0	0	0	1	0	0	0	0	0	0	0	11.8983	0	0	0	0	0	0	0	0	0	0	0	0	0	0	0	0	0	0	0	0	0	0	0	0	0	0	0	0	0	0	0	0
MH0008.scaffold54629_1	31824	2	1		Blautia_hansenii_DSM_20583	0	0	0	36	0	1.10344	0	3.92034	0	0	0	16.54	0	0	0	0	0	0.436033	0	0	0	0	0	0	0	0.906806	0	0	0	0.788481	1.82082	3.01811	0.463366	0.721589	0	0	0	0	0	1.29282	0	0	0	1.67192
MH0009.scaffold101182_2	11770	1	1			0	0	0	1	0	0	0	0	0	0	0	0	12.4154	0	0	0	0	0	0	0	0	0	0	0	0	0	0	0	0	0	0	0	0	0	0	0	0	0	0	0	0	0	0	0
MH0009.scaffold14763_3	25644	3	1			0	0	0	1	0	0	0	0	0	0	0	0	5.72596	0	0	0	0	0	0	0	0	0	0	0	0	0	0	0	0	0	0	0	0	0	0	0	0	0	0	0	0	0	0	0
MH0009.scaffold1880_3	16343	23	9			0	0	0	2	0	0	0	0	0	0	0	0	14.8663	0	0	0	0	0	0	0	0	0	0	0	0	0	0	0	0	0	0	0	0	0	0	0	0	0	0	0	0	0	0	0
MH0009.scaffold25764_2	16834	3	3			0	0	0	1	0	0	0	0	0	0	0	0	3.77313	0	0	0	0	0	0	0	0	0	0	0	0	0	0	0	0	0	0	0	0	0	0	0	0	0	0	0	0	0	0	0
MH0009.scaffold2599_1	10498	1	1			0	0	0	4	0	0	0	0	0	0	0	0	3.03231	0	0	0	0	0	0	0	0	0	0	0	0	0	0	0	0	0	0	0	0	0	0	0	0	0	0	0	0	0	0	0
MH0009.scaffold2868_2	14960	1	1			0	0	0	1	0	0	0	0	0	0	0	0	5.26467	0	0	0	0	0	0	0	0	0	0	0	0	0	0	0	0	0	0	0	0	0	0	0	0	0	0	0	0	0	0	0
MH0009.scaffold2868_3	23614	6	3			0	0	0	3	0	0	0	0	0	0	0	0	4.99619	0	0	0	0	0	0	0	0	0	0	0	0	0	0	0	0	0	0	0	0	0	0	0	0	0	0	0	0	0	0	0
MH0009.scaffold32249_2	10895	2	2		Eubacterium_siraeum_DSM_15702	0	0	0	8	0	0	0	0	0	0	0	0	14.7111	0	0	0	0	0	0	0	0	0	0	0	0	0	0	0	0	0	1.37523	0	0	0	0	0	0	0	0	0	0	0	0	0
MH0009.scaffold32322_1	19510	1	1		Eubacterium_siraeum_DSM_15702	0	0	0	13	0	0	0	0	0	0	0	0	16.3366	0	0	0	0	0	0	0	0	0	0	0	0	0	0	0	0	0	0	3.4963	0	0	0	17.5886	0	0	0.956416	0	25.5793	0	0	0
MH0009.scaffold32655_3	31174	14	7			1	0	0	4	0	0	0	0	0	0	0	0	2.73041	0	0	0	5.6602	0	0	0	0	5.87829	0	0	0	0	0	0	0	0	0	0	0	0	0	0	0	0	0	0	0	0	0	0
MH0009.scaffold3323_3	11887	21	11			0	0	0	2	0	0	0	0	0	0	0	0	3.52517	0	0	0	0	0	0	0	0	0	0	0	0	0	0	0	0	0	0	0	0	0	0	0	0	0	0	0	0	0	0	0
MH0009.scaffold33343_1	18457	1	1			1	0	0	34	1.68672	1.35871	0	0	4.0866	3.17132	3.34377	0	5.1536	14.431	0.865255	0.717495	0	5.69834	0	0.989891	0	0	0	0	6.81339	0	0	0	0	0	4.26116	0	1.03826	0	1.81239	1.72609	0	1.94326	2.14296	1.46401	2.52093	0	0	0
MH0009.scaffold35391_2	15394	10	9			0	0	0	9	0	1.79593	0	0	0	0	0	0	4.83259	0	0	0	0	0	0	0	0	0	0	0	0	0	0	0	0	0	0	9.79343	0	0	0	20.4493	0	0	0	0	0	4.75585	3.01808	0
MH0009.scaffold41051_3	14821	1	1			0	0	0	26	0	8.86568	0	0	0	0	0	0	6.15278	0	0.583247	1.03799	0	0	3.15574	0	0	0	0	0	0	4.3703	0	0	0.744566	0	1.75647	0.387708	0	2.88751	0	1.85538	0	0	0	0.492472	0	0	0	0
MH0010.C1326456_1	10055	7	5		Bacteroides_sp._4_3_47FAA	0	1	0	28	0	0	0	0	0	1.36689	0	0	0	27.1135	0	0	0	6.74329	4.36526	0	11.9807	0	0	0	0	0	0	0	0	0	2.36185	0	0	0	0	13.0433	0	3.34162	0	0	2.58117	3.64917	4.06661	0
MH0010.scaffold36924_2	35161	22	17			1	1	0	105	2.89549	3.6056	0.397742	1.58231	3.80909	12.7898	22.4142	0	13.6078	15.4256	3.69837	17.7542	11.2347	11.3975	0	1.27149	11.2588	5.23767	4.57562	3.02666	0	5.54575	15.6816	0.941282	2.08814	0	3.00685	1.60931	9.1028	5.66964	2.87076	1.2282	1.1806	2.14957	1.33861	0.721117	3.64821	0.917364	8.70833	3.4299
MH0010.scaffold4242_2	12445	3	2			0	0	0	13	0	0	0	0	0	0	0	0	0.490739	14.6183	0	0	0	0	0	0	0	3.21249	0	0	0	0	0	0	1.27778	0	0	0	0	0	0	0	0	0	0	0	0	0	3.8147	0
MH0011.scaffold12699_10	15787	1	1			0	1	0	35	0	0.81981	0	1.78224	0	0	2.90019	0	4.52416	1.62747	2.96958	5.00934	0	0	0	0	0	0	0	0	0	1.38737	3.73596	0.637816	2.05983	0	0	0	1.6759	0.548662	1.22323	1.30776	0	0	0	1.43325	0	2.85345	0	0
MH0011.scaffold13604_7	12054	1	1			0	1	0	14	0	1.26774	0	0	0	0	0	0	0	0	4.35965	0	0	0	0	1.85561	0	0	0	0	0	0	0	0.560214	2.0603	0	0	1.16609	0	0	0	0	0	0	0	0	0	0	0	0
MH0011.scaffold25565_3	13310	1	1			1	1	1	11	0	0.717607	0	0	0	0	0	0	0	0	2.92521	0	0	0	0	0	0	0	0	0	1.80416	0	0	0	1.10296	5.46688	0	0.779064	0	0	0	0	0	0	0	0	0	0	2.04993	0
MH0011.scaffold4185_3	16530	2	2			0	0	0	9	0	0	0	0	0	0	0	0	0	0	3.91288	0	0	0	0	0	0	0	0	0	0	0	0	0	0	0	0	0	0	0	0	0	0	0	0	0	0	2.11262	0	0
MH0011.scaffold57596_1	14456	12	11			0	0	0	1	0	0	0	0	0	0	0	0	0	0	2.65038	0	0	0	0	0	0	0	0	0	0	0	0	0	0	0	0	0	0	0	0	0	0	0	0	0	0	0	0	0
MH0011.scaffold75669_1	30249	3	1			0	0	0	1	0	0	0	0	0	0	0	0	0	0	6.55602	0	0	0	0	0	0	0	0	0	0	0	0	0	0	0	0	0	0	0	0	0	0	0	0	0	0	0	0	0
MH0011.scaffold941_4	11507	1	1			0	0	0	31	0	1.67934	0	1.03343	0	0	0	0	4.99569	0	4.70603	0.417303	0	0	0	0	0	0	0	0.478962	0	0	0	0	7.90937	4.1428	3.57399	0	0	0	0	0.454319	1.10821	0	0.695832	0	0	2.00204	0	0
MH0012.scaffold105343_1	43531	11	8		Clostridium_sp._M62/1	0	0	0	58	0	1.10708	0	0	0	2.94922	5.99883	3.45923	7.67135	2.15243	1.54019	1.32498	0	1.31187	16.7299	0.947805	2.72155	0	1.56099	1.40045	0	0	0	0.71118	0.795093	4.9183	0	0	1.10316	0.600044	0.508384	0	0	0	1.92549	0	0	0	0	1.57316
MH0012.scaffold110296_1	18885	5	2			0	0	0	1	0	0	0	0	0	0	0	0	0	0	0	3.80639	0	0	0	0	0	0	0	0	0	0	0	0	0	0	0	0	0	0	0	0	0	0	0	0	0	0	0	0
MH0012.scaffold173320_1	11342	3	1			0	0	0	1	0	0	0	0	0	0	0	0	0	0	0	3.54996	0	0	0	0	0	0	0	0	0	0	0	0	0	0	0	0	0	0	0	0	0	0	0	0	0	0	0	0
MH0012.scaffold174373_1	16677	1	1			0	0	0	1	0	0	0	0	0	0	0	0	0	0	0	1.76463	0	0	0	0	0	0	0	0	0	0	0	0	0	0	0	0	0	0	0	0	0	0	0	0	0	0	0	0
MH0012.scaffold20426_8	24911	4	4			0	0	0	14	0	0	0	1.81133	0	0	0	0	0	0	0	2.39502	4.94379	0	0	0	0	0	0	0	0	2.46747	0	0	0	0	0	0	0	1.68248	0	1.21857	0	0	0.887854	0	0	0	0	0
MH0012.scaffold22698_1	34186	1	1			0	0	0	7	0	0	0	0	0	0	0	0	0	0	0	2.60903	0	0	0	0	0	0	0	0	0	0	0	0	0	0	0	0	0	0	0	0	0	0	0	0	0	0	0	0
MH0012.scaffold2352_4	21327	5	5			0	0	0	6	0	0	0	0	0	0	0	0	0	0	0	2.9907	0	0	0	0	0	0	0	0	0	0	0	0	0	0	0	0	0	0	0	0	0	0	0	0	0	0	0	0
MH0012.scaffold25695_1	24898	8	5			1	1	0	26	1.57209	2.87408	0	0	0	2.45538	4.84056	0	0	2.76844	2.03166	2.09347	0	0.320278	0	0	0	0	0	0	0	0	0	0	0	0	0	0	0	0	0.591789	0.691109	0	0	0	0	0	1.58167	1.31316	0
MH0012.scaffold35480_2	30800	3	1			0	1	0	1	0	0	0	0	0	0	0	0	0	0	0	1.27281	0	0	0	0	0	0	0	0	0	0	0	0	0	0	0	0	0	0	0	0	0	0	0	0	0	0	0	0
MH0012.scaffold41141_1	22874	5	5			0	0	0	1	0	0	0	0	0	0	0	0	0	0	0	2.85759	0	0	0	0	0	0	0	0	0	0	0	0	0	0	0	0	0	0	0	0	0	0	0	0	0	0	0	0
MH0012.scaffold4664_4	10977	4	4			0	0	0	6	0	0	0	0	0	0	0	0	0	0	0	0.922626	1.36334	0	0	0	0	0	0	0	0	0	0	0	0	0	0	0	0	0	0	0	0	0	0	0	0	0	0	0
MH0012.scaffold55294_1	10731	3	1			0	0	0	1	0	0	0	0	0	0	0	0	0	0	0	5.02676	0	0	0	0	0	0	0	0	0	0	0	0	0	0	0	0	0	0	0	0	0	0	0	0	0	0	0	0
MH0012.scaffold6761_2	37871	10	10			0	0	0	8	0	0	0	2.17608	0	0	0	0	1.06251	0	0	2.34069	0	0	0	0	0	0	0	0	0	0	0	0	0	0	0	0	0	0	0	0	0	0	0	0	0	0	0	0
MH0012.scaffold70610_3	16427	19	10			0	0	0	11	0	0	0	0	0	0.287428	0	0	0	0	0	0.871319	0	0	0	0	0	0	0	0	0	0	0	0	0	0	0	0	0	0	0	0	0	0	0	0	0	0.648964	0	0
MH0012.scaffold70610_4	13273	8	7			0	0	0	11	0	0	0	0	0	0.277263	0	0	0	0	0	0.894564	0	0	0	0	0	0	0	0	0	0	0	0	0	0	0	0	0	0	0	0	0	0	0	0	0	0.596155	0	0
MH0012.scaffold79530_3	26172	4	4			0	0	0	1	0	0	0	0	0	0	0	0	0	0	0	2.79355	0	0	0	0	0	0	0	0	0	0	0	0	0	0	0	0	0	0	0	0	0	0	0	0	0	0	0	0
MH0012.scaffold82217_2	28983	8	6			0	0	0	6	0	0	0	0	0	0	0	0	0	0	0	3.64093	4.68405	0	0	0	0	0	0	0	0	0	0	0	0	0	0	0	0	0	0	0	0	0	0	0	0	0	0	0
MH0012.scaffold82217_3	14619	4	4			0	0	0	4	0	0	0	0	0	0	0	0	0	0	0	3.06748	3.49395	0	0	0	0	0	0	0	0	0	0	0	0	0	0	0	0	0	0	0	0	0	0	0	0	0	0	0
MH0012.scaffold8450_1	24784	4	4			1	0	0	9	0	0	0	0	0	0	0	0	0	0	0	1.22526	8.42253	0	0	0	0	7.16873	0	0	0	0	0	0	0	0	0	0	0	0	0	0.883851	0	0	0	0	0	0	0	0
MH0012.scaffold87237_1	16440	3	2			1	0	0	4	0	0	0	0	0	0	0	0	1.18033	0	0	2.81596	0	0	0	0	0	0	0	0	0	0	0	0	1.50354	0	0	0	0	0	0	0	0	0	0	0	0	0	0	0
MH0012.scaffold920_1	38344	1	1			0	0	0	46	0	0	1.62445	0	0.753968	0	1.08005	0	3.32414	0	0	3.26606	0	3.53656	0	2.59503	0	5.11145	5.02072	0	0	0	0	0	0	0	3.2586	0.380154	0	0.595522	0.689143	0	0	0.434475	0.848423	1.70978	0	0	0	0
MH0012.scaffold98449_1	14641	7	6			0	0	0	1	0	0	0	0	0	0	0	0	0	0	0	1.38124	0	0	0	0	0	0	0	0	0	0	0	0	0	0	0	0	0	0	0	0	0	0	0	0	0	0	0	0
MH0012.scaffold98449_3	19326	11	6			0	0	0	2	0	0	0	0	0	0	0	0	0	0	0	1.32678	0	0	0	0	0	0	0	0	0	0	0	0	0	0	0	0	0	0	0	0	0	0	0	0	0	0	0	0
MH0013.C1643781_1	14647	3	3	Ruminococcus_sp._5_1_39BFAA_32503		0	0	0	4	0	0	0	0	0	0	0	0	0	0	0	0	59.122	0	0	0	0	0	5.03396	0	0	0	0	0	0	0	0	0	0	0	0	0	0	0	0	0	0.999542	0	0	0
MH0013.scaffold31594_1	14480	2	1			0	0	0	2	0	0	0	0	0	0	0	0	0	0	0	0	10.9637	0	0	0	0	0	0	0	0	0	0	0	0	0	0	0	0	0	0	0	0	2.02279	0	0	0	0	0	0
MH0014.scaffold10101_1	21750	5	5			1	1	0	28	1.25869	2.04588	0	0	4.49717	0.427189	0	0	0	0	0	0.659748	0	8.29188	0	0	0	0	0	0	1.52011	0	0	0	1.48394	0	2.21958	0	0	0	0	1.0804	0	1.25844	0	3.11568	2.25423	0	0	0
MH0014.scaffold16636_6	19554	11	7			0	0	0	44	0	0	6.7956	0	0	0.676422	0	4.73382	0	0	2.12148	0	0	5.23437	0	0	0	0	0	0	0	1.38623	0	4.08656	0	1.16377	1.44815	0	0.906087	0.750967	0.516706	2.92344	0	0.875898	1.1834	0	0	0	0	0
MH0014.scaffold19960_1	37572	12	1			0	0	0	3	0	0	0	0	0	0	0	0	0	0	0	0	0	7.30402	0	0	33.9526	0	0	0	0	0	0	0	0	0	0	0	0	0	0	0	0	0	0	0	0	0	0	0
MH0014.scaffold22267_8	15191	1	1			0	0	0	4	0	0	0	0	0	0	0	0	0	0	0	0	0	3.87719	0	0	0	0	0	0	0	0	0	0	0	0	0	0	0	0	2.99474	0	0	0	0	0	0	0	0	0
MH0014.scaffold25887_1	18116	21	17			0	1	0	34	5.52678	0	0	0	0	0.669005	0	0	0	5.04676	0.625635	0.158137	0	5.22293	0	2.05633	6.52152	0	1.39874	0	9.68827	3.12875	0	0	0	0	1.81996	0	1.17508	0.789679	0	4.17941	0	0	0	0	0	0	0	1.57295
MH0014.scaffold29821_4	11218	2	2			0	0	0	54	0	0	0	3.15105	6.75936	3.09437	5.9536	0	2.02045	3.16815	2.37819	1.97633	4.20574	5.92749	0	0	4.78271	0	0	0	0	0	6.72756	1.94955	3.73443	1.45983	0	0.973181	4.53496	1.88308	0.493774	10.9386	0	0.544474	1.71354	2.02402	1.23678	0.76191	0.584976	0
MH0014.scaffold29865_1	19048	1	1			0	0	0	5	0	0	0	0	0	0	0	0	0	0	0	0	0	4.84142	0	0	0	0	0	0	0	0	14.4526	0	0	0	0	0	0	0	0	0	0	0	0	0	0	0	0	0
MH0014.scaffold456_3	20253	6	4			0	1	0	45	2.52732	0	11.5273	0	0	0	0	0	0	0	0	0.585065	0	3.77124	4.53004	0	8.11881	0	0	0	0	0	0	0	0.393406	0	4.30136	0	1.25322	0.605224	3.1012	0.611431	0	0	2.76747	0	1.003	0	0.874182	0
MH0014.scaffold4708_1	44616	4	2			0	0	0	2	0	0	2.63672	0	0	0	0	0	0	0	0	0	0	4.39081	0	0	0	0	0	0	0	0	0	0	0	0	0	0	0	0	0	0	0	0	0	0	0	0	0	0
MH0014.scaffold55358_2	10983	10	8			1	1	0	32	0	1.622	0	0	4.46006	0	4.82934	0	1.18248	10.033	0	0.627538	0	7.26904	0	1.17536	0	1.24742	0	0	4.70046	0	0	0	0.803537	0	2.81334	0	0	0	1.97048	1.10819	0	1.2771	2.16807	0	2.55129	0	0	0
MH0014.scaffold72074_1	17083	1	1			0	0	0	12	0	0	0	0	0	0	0	0	0	0	0	0	0	11.9316	0	0	0	0	0	0	0	0	0	0	0	0	0	0	0	0	0	0	0	0	0	0	0	0	0	0
MH0014.scaffold79710_1	15833	4	3			0	0	0	1	0	0	0	0	0	0	0	0	0	0	0	0	0	2.89858	0	0	0	0	0	0	0	0	0	0	0	0	0	0	0	0	0	0	0	0	0	0	0	0	0	0
MH0014.scaffold79710_3	18973	2	1			0	0	0	1	0	0	0	0	0	0	0	0	0	0	0	0	0	3.3165	0	0	0	0	0	0	0	0	0	0	0	0	0	0	0	0	0	0	0	0	0	0	0	0	0	0
MH0014.scaffold92154_2	20154	5	5			0	0	0	17	0	0	0	0	0	2.26352	0	0	0	0	0	0	0	7.35613	0	0	6.6242	0	0	0	0	0	8.83375	14.4532	0	0	0	0	0	0	0	0	0	0	0	0	0	0	0	0
MH0015.scaffold62095_2	17061	5	4			0	0	0	2	0	0	0	0	0	0	0	0	0	0	0	0	0	0	13.9065	0	0	0	0	0	0	0	0	0	0	0	0	0	0	0	0	0	0	0	0	0	0	0	0	0
MH0016.scaffold10808_2	23918	4	4			0	1	0	75	0	5.71499	0.883073	2.45817	9.8668	0.677851	2.41419	0	7.34559	0	3.83541	1.72793	1.64266	0.962508	0	5.6125	11.651	0	1.99116	0	0	4.03801	4.31994	2.64746	2.53633	0	0	4.54763	3.03576	5.54079	3.6896	2.40882	0	3.82411	3.60275	0.570711	1.1253	2.43807	0.417431	3.61215
MH0016.scaffold10923_8	24600	4	4		Bacteroides_cellulosilyticus_DSM_14838	0	0	0	4	0	0	1.79015	0	0	0	0	0	0	0	0	0	1.65458	0	3.53175	4.07368	0	0	0	0	0	0	0	0	0	0	0	0	0	0	0	0	0	0	0	0	0	0	0	0
MH0016.scaffold1154_5	23147	15	12		Roseburia_intestinalis_L1-82	0	1	0	22	0.8912	0	0	0	0	0.207185	0	0	0	0	0.39651	0	0	0	0	3.8844	0	0	0	0	0	6.17501	0	0.729528	0	0	1.49523	0	0	0	0	0	0	10.3699	0	0	0	0	0	0
MH0016.scaffold1154_6	10788	14	8		Roseburia_intestinalis_L1-82	0	1	0	19	0	0	0	0	0	0.135408	0	0	0	0	0	0	0	0	0	3.92975	0	0	0	0	0	5.75986	0	0.738765	0	0	1.53854	0	0	0	0	0	0	8.48107	0	0	0	0	0	0
MH0016.scaffold17180_2	11046	1	1			0	0	0	33	0	0	0	0	0	0	0	0	0	0	0	0.53092	0	0	0	8.20934	0	0	0	0	0	0	0	0	0	1.17578	0	1.612	0	0	0	0	0	0	0	0	0	0	0	1.74065
MH0016.scaffold20741_2	22647	1	1			0	0	0	1	0	0	0	0	0	0	0	0	0	0	0	0	0	0	0	2.83683	0	0	0	0	0	0	0	0	0	0	0	0	0	0	0	0	0	0	0	0	0	0	0	0
MH0016.scaffold21089_1	13314	1	1			0	1	0	3	0	0	0	0	0	0	0	0	0	0	0	0	0	0	0	4.12319	0	0	0	0	0	0	0	0	0	0	0	0	0	0	0	0	0	0	0	0	0	0	0	0
MH0016.scaffold22762_6	17584	3	3			0	0	0	23	0	0	0	0	0	0.562309	1.01587	0	0	2.62505	0.369948	0	0	0.472717	0	2.86501	0	0	0	0	0.826909	0	0	0	0.546691	0	0	0.610862	0	0	0.6919	0	0	0	9.4361	0	0	0	0.987727	0
MH0016.scaffold27181_3	10185	14	2			0	0	0	1	0	0	0	0	0	0	0	0	0	0	0	0	0	0	0	2.74193	0	0	0	0	0	0	0	0	0	0	0	0	0	0	0	0	0	0	0	0	0	0	0	0
MH0016.scaffold33786_10	16935	1	1			0	0	0	6	0	0	0	0	0	0	0	0	0	0	0	0	0	0	0	3.5453	0	0	0	0	0	0	0	0	0	0	0	0	0	0.389743	0	0	0	0	0	0	0	0	0	0
MH0016.scaffold33786_11	17299	24	20			0	0	0	6	0	0	0	0	0	0	0	0	0	0	0	0	0	0	0	3.89302	0	0.779406	0	0	0	0	0	0	0	0	0	0	0	0.415742	0	0	0	0	0	0	0	0	0	0
MH0016.scaffold33969_1	57362	3	2			0	0	0	14	3.08214	0	0	0	0	0.90999	0	0	0	0	0	0	0	0	0	4.31894	0	0	0	0	0	0	0	0	0	0.575234	0	1.49922	0	0	0	1.15901	0	0	0	0	0	0	0	0
MH0016.scaffold38494_1	37940	12	9			0	0	0	1	0	0	0	0	0	0	0	0	0	0	0	0	0	0	0	6.14388	0	0	0	0	0	0	0	0	0	0	0	0	0	0	0	0	0	0	0	0	0	0	0	0
MH0016.scaffold5377_2	33271	10	6			0	0	0	1	0	0	0	0	0	0	0	0	0	0	0	0	0	0	0	4.01223	0	0	0	0	0	0	0	0	0	0	0	0	0	0	0	0	0	0	0	0	0	0	0	0
MH0016.scaffold5895_2	16259	4	4			0	0	0	7	0	0	0	0	0	0	0	0	0	0	0	0	0	0	0	6.24517	0	0	0	0	0	0	0	0	0	0	0	0	0	0	0	0	0	0	0	1.16261	0	0	0	0
MH0016.scaffold5895_3	16362	4	4			0	0	0	3	0	0	0	0	0	0	0	0	0	0	0	0	0	0	0	6.62865	0	0	0	0	0	0	0	0	0	0	0	0	0	0	0	0	0	0	0	1.70218	0	0	0	0
MH0016.scaffold6785_6	47100	4	3			0	0	0	2	0	0	0	0	0	0	0	0	0	0	0	0	0	0	4.27697	6.80248	0	0	0	0	0	0	0	0	0	0	0	0	0	0	0	0	0	0	0	0	0	0	0	0
MH0017.scaffold42056_1	14781	4	4			0	1	0	1	0	0	0	0	0	0	0	0	0	0	0	0	0	0	0	0	16.88	0	0	0	0	0	0	0	0	0	0	0	0	0	0	0	0	0	0	0	0	0	0	0
MH0018.scaffold22251_2	58081	22	9			0	0	0	27	5.77431	4.63944	0	29.3665	0	0	1.75345	17.6585	0	0	0	0	0	90.1975	0	0	0	12.813	0	141.358	0	0	0	0	0	0	10.9903	0	0	1.95491	0	0	0	0	0	0	0	0	0	15.377
MH0018.scaffold24182_2	43855	10	10			0	1	0	10	0	0	0	0	0	0	0	0	0	0	0	0	0	0	0	0	0	14.2056	0	0	23.793	0	0	0	0	0	0	1.69948	0	0	0	0	0	0	0	0	0	0	0	0
MH0020.scaffold10958_1	12045	2	2			0	0	0	15	0	0	0	0	0	0	0	0	0	0	0	0	0	0	3.13413	0	0	0	0	7.26994	0	0	0	0	0	0	0	1.18126	0	0	1.6547	0	0	0.869402	0	0	1.37644	1.3593	0	0
MH0020.scaffold11698_1	20265	8	5		Parabacteroides_merdae_ATCC_43184	1	1	0	16	0	0	0	0	0	0	0	0	0	0	0	0	0	0	0	0	0	0	0	5.97318	0	0	0	0	0	0	0	0	0	0	0	0	0	0	0	0	1.9561	1.04385	0	1.37698
MH0020.scaffold1215_4	38353	16	10		Bacteroides_finegoldii_DSM_17565	0	1	1	50	0	0	0.885802	0	0	0	5.10809	0	0	23.6763	0	0	0	0	0	0	0	0	0	9.59236	0	0	0	0	0	0	14.4834	4.30494	1.02378	0	0	0	4.79925	0	0	16.5165	0	0	25.6308	0
MH0020.scaffold15386_1	22265	9	4		Bacteroides_sp._2_1_33B	0	0	0	2	0	0	0	0	0	0	0	0	0	0	0	0	0	0	0	0	0	0	0	14.0782	0	0	0	0	0	0	0	0	0	0	0	0	0	0	0	0	0	0	0	0
MH0020.scaffold18411_2	63666	9	6		Bacteroides_stercoris_ATCC_43183	1	1	0	42	2.26092	0	51.6174	5.44406	4.70085	0	1.42264	0	2.34061	0	0	0	0	0	0	4.88509	20.4383	0	0	7.08467	0	0	0	0	18.5682	2.04203	0	24.9071	0	0	0	0	0.847795	0	0	0	0	0	20.9822	6.68232
MH0020.scaffold25388_1	21253	4	4			0	0	0	6	0	0	0	0	0	0	0	0	0	0	0	0	0	0	0	1.14828	0	0	0	9.34262	0	0	0	0	0	0	0	0	0	0	0	0	0	0	0	0	0	0	0	0
MH0020.scaffold2645_1	36914	15	10			0	0	0	1	0	0	0	0	0	0	0	0	0	0	0	0	0	0	0	0	0	0	0	7.29214	0	0	0	0	0	0	0	0	0	0	0	0	0	0	0	0	0	0	0	0
MH0020.scaffold2835_2	22898	8	7			0	0	0	1	0	0	0	0	0	0	0	0	0	0	0	0	0	0	0	0	0	0	0	14.366	0	0	0	0	0	0	0	0	0	0	0	0	0	0	0	0	0	0	0	0
MH0020.scaffold3307_1	36118	9	9		Bacteroides_sp._2_1_33B	0	0	0	3	0	0	2.07681	0	0	0	0	0	0	0	0	0.633308	0	0	0	0	0	0	0	12.8964	0	0	0	0	0	0	0	0	0	0	0	0	0	0	0	0	0	0	0	0
MH0020.scaffold41215_1	76658	13	13			0	1	0	1	0	0	0	0	0	0	0	0	0	0	0	0	0	0	0	0	0	0	0	10.2784	0	0	0	0	0	0	0	0	0	0	0	0	0	0	0	0	0	0	0	0
MH0020.scaffold47302_3	17859	2	2			0	0	0	10	0	0	1.6924	0	0	0	0	0	0	0	0	0	0	0	0	0	2.39874	0	0	4.61086	0	0	0	0	0	0	2.8918	0	0	0	0	0	0	0	0	0	0	0	0	0
MH0020.scaffold48159_1	16673	3	3			0	0	0	4	0	0	0	0	0	0	0	0	0	0	0	0	0	0	0	1.08633	0	0	0	8.16845	0	0	0	0	0	0	0	0	0	0	0	0	0	0	0	0	0	0	0	0
MH0022.scaffold53395_2	11758	28	18			0	0	0	49	1.43752	1.1925	2.36799	0	0	1.70296	2.45807	0	0	0	0	0	1.08558	0.522269	0	0	3.71707	0	0	0	7.33274	9.16507	3.34369	12.7935	0	1.60148	0	4.16187	0	0	0	0.967805	0	0.739107	0	0	0	0	6.53335	0
MH0023.C1325984_1	14265	13	5			1	0	0	6	0	0	0	0	0	0	0	0	0	0	0	0	1.46898	0	0	0	0	0	0	0	0	0	58.8228	0	0	0	0	0	0	0	0	0	0	0	0	0	0	0	0	0
MH0023.scaffold21799_1	17965	1	1			0	0	0	1	0	0	0	0	0	0	0	0	0	0	0	0	0	0	0	0	0	0	0	0	0	0	16.1607	0	0	0	0	0	0	0	0	0	0	0	0	0	0	0	0	0
MH0023.scaffold27080_3	11672	53	33			0	0	0	2	0	0	0	0	0	0	0	0	0	0	0	0	0	0	0	0	0	0	0	0	0	0	15.255	0	0	0	0	0	0	0	0	0	0	0	0	0	0	0	0	0
MH0025.scaffold105015_1	17735	2	2			0	0	0	24	0	2.87946	0	0	0	0	0	0	0	0	0	0	0	0	0	0	0	0	6.84377	27.4628	0	0	0	0	4.62584	0	0	0	0	0	0	0	0	1.27559	0	0	0	0.586501	0	4.52671
MH0025.scaffold62644_1	15861	1	1			0	0	0	1	0	0	0	0	0	0	0	0	0	0	0	0	0	0	0	0	0	0	0	0	0	0	0	0	5.66076	0	0	0	0	0	0	0	0	0	0	0	0	0	0	0
MH0025.scaffold7631_2	21253	1	1			0	0	0	27	0.742859	0	0	0	0	1.88138	0	0	0.344564	22.2992	0	0	0	3.97527	0	0	0	0	0	0	0	0	0	0	5.74412	2.6308	0	0	0	0	1.74042	9.24352	0	0	1.75243	0	2.71584	15.3278	0	0
MH0026.scaffold1235_10	27539	5	3		Clostridiales_bacterium_1_7_47FAA	0	1	0	52	10.0697	7.26015	0.804094	0	1.46575	13.3904	11.9533	0	0.414754	15.548	1.65201	0.27721	0	0	0	0	0	0	0	2.07408	0	0	0	0.983664	2.19754	12.1236	0	0	6.96559	10.3471	0	0	0.47854	0	1.42562	0.700623	0.415039	0.731318	0	14.1105
MH0026.scaffold19495_2	81027	4	3			0	0	0	7	0	0	0	0	0	0	0	0	0	0	0	0	0	0	0	0	0	0	0	0	0	0	0	0	0	11.8853	0	0	0	1.13224	0	0	0	0	0	0	0	0	0	0
MH0026.scaffold22321_3	11584	1	1			0	0	0	7	0	0	0	0	0	0	0	0	0	0	0	0	0	0	0	0	0	0	0	0	0	0	0	0	0	4.20355	0	0	0	0.786488	0	0	0	0.398805	0	0	1.09092	0	0.860243	0
MH0026.scaffold2466_2	13723	2	2			0	0	0	2	0	0	0	0	0	0	0	0	0	0	0	0	0	0.482828	0	0	0	0	0	0	0	0	0	0	0	18.2641	0	0	0	0	0	0	0	0	0	0	0	0	0	0
MH0026.scaffold24863_3	14238	5	5			0	0	0	16	0	0	0	0	0	0	0	0	0	0	1.1867	0	0	0	0	0	0	0	5.31662	0	1.72535	0	0	0	0	4.89868	0	0	0	0	0	0	0	0	0	0.838533	0	0	0	0
MH0026.scaffold29819_1	15899	1	1			0	0	0	6	0	0	0	0	0	0	0	0	0	0	0	0	0	0	0	0	0	0	0	0	0	0	0	0	0	7.30713	0	0	0.553465	0	0	0	8.13138	0	0	0	0	0	0	0
MH0026.scaffold47503_3	10036	2	2			0	0	0	33	0	2.14096	0	1.30802	0	0	0	0	2.08079	0	4.92181	0.764717	0	0	0	0	0	0	0	0.427901	0	0	0	0	6.20195	5.48856	4.25135	0	0	0	0	0.59027	1.05394	0	0.729055	0	0.737014	4.08092	0	0
MH0026.scaffold47727_1	23400	1	1			0	0	0	1	0	0	0	0	0	0	0	0	0	0	0	0	0	0	0	0	0	0	0	0	0	0	0	0	0	11.4121	0	0	0	0	0	0	0	0	0	0	0	0	0	0
MH0026.scaffold47727_2	13678	1	1			0	0	0	1	0	0	0	0	0	0	0	0	0	0	0	0	0	0	0	0	0	0	0	0	0	0	0	0	0	10.7052	0	0	0	0	0	0	0	0	0	0	0	0	0	0
MH0026.scaffold508_6	28251	2	2			0	0	0	33	0	0	0	0	0	0.396811	0	0	0.521228	0	0	0	0	0.39782	6.32158	0	0	0	1.95612	0	7.97846	0	0	0	0	8.17757	1.64265	0	0.482226	1.25003	0.449117	0.85051	0	8.2209	0	0	2.89814	0	2.12076	0
MH0026.scaffold5104_5	50564	12	9	Clostridium_sp._L2-50_18211		0	0	0	54	0	0.995105	0	0	0	2.94534	6.61007	2.99768	6.1222	2.28668	1.51246	0.677985	0	1.51718	12.8522	0.693927	2.58665	0	1.35944	1.13358	0	0	0	0	0.70886	10.3313	0	0	0.977994	0.615524	0	0	0	0	1.77021	0	0	0	0	1.86581
MH0026.scaffold5473_19	10203	20	12			1	1	0	92	2.80489	2.99078	0	7.53309	7.0839	17.8406	30.2391	0	5.61029	0	1.37885	20.7603	6.93433	3.51999	5.28698	1.95233	12.4639	0	3.65349	0	17.1613	32.8797	15.4447	2.44399	2.65492	6.94911	4.55339	19.5924	69.7316	16.5651	3.92143	2.64279	0.855297	29.5095	4.78744	0.945369	8.65746	1.69771	13.603	0.984882
MH0028.scaffold16301_5	21512	1	1			1	1	0	16	0	0	0	0	0	0	0	0	0	0	0	0	4.44477	0	0	7.10715	0	0	0	0	0	0	0	0	0	0	3.46411	6.19082	0	0	0	0	0	0	0	0	0	0	8.00218	0
MH0028.scaffold22329_2	20562	86	33			1	1	0	1	0	0	0	0	0	0	0	0	0	0	0	0	0	0	0	0	0	0	0	0	0	0	0	0	0	0	0	5.14068	0	0	0	0	0	0	0	0	0	0	0	0
MH0028.scaffold22329_3	12577	88	33			0	0	0	2	0	0	0	0	0	0	0	0	0	0	0	0	0	0	0	0	0	0	0	0	0	0	0	0	0	0	0	5.78285	0	0	0	0	0	0	0	0	0	0	0	0
MH0028.scaffold3573_2	15836	1	1			1	0	0	1	0	0	0	0	0	0	0	0	0	0	0	0	0	0	0	0	0	0	0	0	0	0	0	0	0	0	0	4.54642	0	0	0	0	0	0	0	0	0	0	0	0
MH0028.scaffold49524_2	10463	1	1			0	0	0	2	0	0	0	0	0	0	0	0	0	0	0	0	0	0	0	0	0	0	0	0	0	0	0	0	0	0	0	4.47178	0	0	0	0	0	0	0	0	0	0	0	0
MH0028.scaffold49524_6	13362	7	7			0	0	0	1	0	0	0	0	0	0	0	0	0	0	0	0	0	0	0	0	0	0	0	0	0	0	0	0	0	0	0	4.62909	0	0	0	0	0	0	0	0	0	0	0	0
MH0028.scaffold58968_4	14584	21	10		Bacteroides_vulgatus_PC510	0	0	0	10	0	0	0	0	0	0	0	0	0	0	0	0	0	0	0	0	0	0	0	0	0	0	0	0	0	0	1.83356	6.40771	0	0	0	10.4338	0	0	0	0	0	0	0	0
MH0028.scaffold7268_2	19222	8	7			0	0	0	2	0	0	0	0	0	0	0	0	0	0	0	0	0	0	0	0	0	0	0	0	0	0	0	0	0	0	0	4.83692	0	0	0	0	0	0	0	0	0	0	0	0
MH0030.scaffold125_3	54484	7	7			0	0	0	1	0	0	0	0	0	0	0	0	0	0	0	0	0	0	0	0	0	0	0	0	0	0	0	0	0	0	0	0	5.62142	0	0	0	0	0	0	0	0	0	0	0
MH0030.scaffold1317_1	17239	3	2			0	0	0	9	0	0	0	0	0	0	0	0	0	0	0	4.44171	0	0	0	0	0	0	0	0	0	0	0	0	3.68535	0	0	0	11.8559	0	0	6.14658	0	0	0	0	0	0	0	0
MH0030.scaffold2277_2	17742	3	3			1	1	0	38	0	4.46838	0	3.2565	1.06587	4.39784	0	0	1.32042	1.25882	0	1.79048	2.20914	0	0	0	0	0	0	0	0	3.23994	0	0	0	0	0	0	8.59084	2.23591	0	1.35002	0	0.702021	0	0	0	1.54805	5.15233	0
MH0030.scaffold24230_2	36967	17	8			0	0	0	2	0	0	0	0	0	0	0	0	0	0	0	0	0	0	0	0	0	0	0	0	0	0	0	0	0	0	0	0	10.2222	0	0	0	0	0	0	0	0	0	0	0
MH0030.scaffold29447_1	15385	5	3			0	0	0	13	0	0	4.92917	0	0	0	0	0	0	0	1.12258	0	0	2.39411	0	0	0	0	0	0	0	2.8244	7.10694	0	0	0	0	0	9.15608	0	0	0	0	0	0	0	0.960414	0	0	0
MH0030.scaffold5258_1	11620	1	1			0	0	0	1	0	0	0	0	0	0	0	0	0	0	0	0	0	0	0	0	0	0	0	0	0	0	0	0	0	0	0	0	4.8224	0	0	0	0	0	0	0	0	0	0	0
MH0030.scaffold61572_2	14464	23	16			0	0	0	3	0	0	0	0	0	0	0	0	0	0	0	0	0	0	0	0	0	0	0	0	0	0	0	0	0	0	0	0	5.04781	0	0	0	0	0	0	0	0	0	0	0
MH0031.scaffold334_19	23928	1	1			0	0	0	1	0	0	0	0	0	0	0	0	0	0	0	0	0	0	0	0	0	0	0	0	0	0	0	0	0	0	0	0	0	3.62128	0	0	0	0	0	0	0	0	0	0
MH0031.scaffold334_23	15593	1	1			0	0	0	1	0	0	0	0	0	0	0	0	0	0	0	0	0	0	0	0	0	0	0	0	0	0	0	0	0	0	0	0	0	3.75643	0	0	0	0	0	0	0	0	0	0
MH0032.scaffold11044_2	37777	2	1			1	0	0	29	0	0	0	96.6964	2.52177	12.7209	0	0	0	0	0	34.3685	14.215	17.0806	0	0	4.41961	0	43.9063	0	0	0	23.3483	7.60407	0	86.2322	0	0	0	0	7.25567	23.4338	0	14.2	0	0	0	5.16283	0	27.9818
MH0032.scaffold1671_6	10818	21	17		Clostridium_scindens_ATCC_35704	0	0	0	41	2.38213	1.24625	0	0	0	0	0	3.87061	1.01428	0	2.79217	1.07728	0	0.462486	1.05069	0	1.6292	0	0	0	1.73089	0	0	0	0.753443	1.08691	0	0	1.195	0	4.46025	0	0	3.088	0	0	0	0	0	0
MH0032.scaffold47022_1	23210	3	3			1	1	0	2	0	0	0	0	0	0	0	0	0	0	0	0	0	0	0	0	0	0	0	0	0	0	0	0	0	0	0	0	0	0	7.46492	0	0	0	0	0	0	0	0	0
MH0032.scaffold47022_10	23430	4	3			1	1	0	2	0	0	0	0	0	0	0	0	0	0	0	8.12381	0	0	0	0	0	0	0	0	0	0	0	0	0	0	0	0	0	0	9.02008	0	0	0	0	0	0	0	0	0
MH0032.scaffold47022_8	16163	21	14			1	1	0	2	0	0	0	0	0	0	0	0	0	0	0	4.33809	0	0	0	0	0	0	0	0	0	0	0	0	0	0	0	0	0	0	12.5189	0	0	0	0	0	0	0	0	0
MH0032.scaffold7595_3	25674	1	1		Bacteroides_sp._2_1_7	0	0	0	65	0	0	10.7155	0	0	0	0	0	0	0	6.34626	4.71032	0	0	0	0	15.8114	5.40238	9.70457	0	0	0	0	0	0	0	0	12.0657	0	0	7.96213	4.7437	1.65634	3.72631	0	0	4.92645	3.55143	6.03844	0
MH0033.scaffold106138_1	58674	10	6			1	1	0	1	0	0	0	0	0	0	0	0	0	0	0	0	0	0	0	0	0	0	0	0	0	0	0	0	0	0	0	0	0	0	0	9.57485	0	0	0	0	0	0	0	0
MH0033.scaffold107232_1	12011	2	2			0	0	0	2	0	0	0	0	0	0	0	0	0	0	0	0	0	0	0	0	0	0	0	0	0	0	0	0	0	0	0	0	0	0	0	8.20051	0	0	0	0	0	0	0	0
MH0033.scaffold113011_2	10034	2	2			1	0	0	3	0	0	0	0	0	0	0	0	0	0	0	6.99008	0	0	0	0	0	0	0	0	0	0	0	0	0	0	0	0	0	0	0	7.85884	0	0	0	0	0	0	0	0
MH0033.scaffold114125_1	21962	2	2	Parabacteroides_sp._D13_38359		1	1	0	1	0	0	0	0	0	0	0	0	0	0	0	0	0	0	0	0	0	0	0	0	0	0	0	0	0	0	0	0	0	0	0	8.16477	0	0	0	0	0	0	0	0
MH0033.scaffold34762_1	27556	4	2			1	0	0	16	0	1.10661	4.7868	0	0	0	0	0	0	0	0.897291	0	0	1.25852	0	0	0	0	0	0	0	0	0	0	0.555431	0	0	0	0	0	0	9.36667	0	0	0	0	0	0	0	0
MH0033.scaffold4517_4	21742	3	3			0	0	0	9	0	1.33498	0	0	0	0	0	0	0	0	0	0	0	0	0	0	0	0	0	0	0	0	0	0	0	0.635268	0	0	0	0	0	3.6581	0	0	0.663809	0	0	0	0.930645	0
MH0033.scaffold47178_1	14585	2	1			0	0	0	4	0	0	0	0	0	0	0	0	0	0	0	4.01437	0	0	0	0	0	0	0	0	0	0	0	0	0	0	0	0	0	0	0	10.6584	0	0	0	0	0	0	0	0
MH0033.scaffold60474_1	12714	1	1		Bacteroides_vulgatus_PC510	0	0	0	19	0	0	0	0	0	0.854096	3.46058	0	0	0	0	0	0	3.89985	0	0	7.15506	6.22161	0	0	0	0	0	0	0	0	5.60261	0	0	0	0	6.16897	0	0	0	0	0	0	0	0
MH0033.scaffold6810_2	11227	22	15			0	0	0	7	0	0	0	0	0	0	0	5.12175	0	0	0	0	0	0	0	0	0	0	0	0	0	0	0	0	0	0	0	0	0	0	0	7.86461	0	0	0	6.59536	0	0	9.40275	0
MH0033.scaffold918_4	22527	19	15			1	0	0	25	0	0	0	6.80776	0	1.58669	0	0	0	0	0	0.504606	0	0	0	0	0	0	0	0	0	4.04563	0	0	0	0	0	0	0	0	0.633603	5.10138	0	17.2225	0	0	1.15044	0	0	0
MH0034.scaffold1101_2	15343	1	1			0	0	0	5	0	0	0	0.949104	0	0	0	0	0	0	0	3.46396	0	0	0	0	0	0	0	0	0	0	0	0	0	0	0	0	0	0	0	0	12.2442	0	0	0	0	0	0	0
MH0034.scaffold15675_2	49153	20	8			0	0	0	13	4.18467	4.09858	0	32.3764	0	0	0	0	0	0	0	0	0	61.6187	0	0	0	0	0	102.299	0	0	0	0	0	0	8.46663	0	0	0	0	0	9.66391	0	0	0	0	0	0	12.0711
MH0034.scaffold35015_7	26189	1	1			0	0	0	2	0	0	0	0	0	0	1.72435	0	0	0	0	0	0	0	0	0	0	0	0	0	0	0	0	0	0	0	0	0	0	0	0	0	4.83879	0	0	0	0	0	0	0
MH0034.scaffold5199_4	13511	8	6			0	0	0	3	0	0	0	0	0	0	0	0	0	0	0	0	0	0	0	0	0	0	0	0	0	0	0	0	0	0	0	0	0	0	0	0	11.5585	0	0	0	0	0	0	0
MH0034.scaffold5199_5	13270	15	11			0	0	0	5	0	0	0	0	0	0	0	0	0	0	0	0	101.433	0	0	0	0	0	0	0	0	0	0	0	0	0	0	0	0	0	0	0	12.4084	2.47974	0	0	0	0	0	0
MH0035.scaffold15127_1	10036	5	4			0	0	0	8	0	0	0	0	0	0	0	0	1.28175	0	0	0	0	0	0	0	0	0	0	0	0	0	0	0	0	0	0	0	0	0	0	0	0	10.6112	0	0	0	4.5387	0	0
MH0035.scaffold46816_1	25150	2	2			0	0	0	6	0	0	0	0	0	0	0	0	0	0	0	0	0	0	0	0	0	0	0	0	0	0	0	0	0.573403	0	0	0	0	0	0	0	0	11.2538	0	0	0	0	0	0
MH0035.scaffold47104_1	10308	2	2			1	0	0	2	0	0	0	0	0	0	0	0	0	0	0	0	0	0	0	0.655453	0	0	0	0	0	0	0	0	0	0	0	0	0	0	0	0	0	4.81428	0	0	0	0	0	0
MH0035.scaffold5110_1	10806	25	21			0	1	1	51	0	2.43952	1.16273	0.853284	0	0.622175	0	0	2.06889	0	1.17523	0	0	0.6214	0	0	0	0	1.66737	0	1.63844	0	0	0	5.38134	2.01333	3.00941	5.14883	1.35552	0.699542	0	8.15322	0	3.86701	0.801618	0	0	0	0	15.6725
MH0035.scaffold678_1	13003	15	12		Roseburia_intestinalis_L1-82	0	1	0	14	0	0	0	0	0	0.135272	0	0	0	0	0	0	0	0	0	2.11191	0	0	0	0	0	4.43891	0	0.619036	0	0	1.20444	0	0	0	0	0	0	10.4835	0	0	0	0	0	0
MH0035.scaffold74406_3	10485	3	3			0	0	0	3	0	0	0	0	0	0	0	0	0	0	0	0	0	0	0	0	0	0	0	0	0	0	0	9.26785	0	0	0	0	0	0	0	0	0	3.35373	0	0	0.589318	0	0	0
MH0035.scaffold93254_1	10194	5	4			1	0	0	3	0	0	0	0	0	0	0	0	0	0	0	0	0	0	0	0.988839	0	0	0	0	0	0	0	0	0	0	0	0	0	0	0	0	0	5.56856	0	0	0	0	0	0
MH0035.scaffold95655_1	15055	29	18			0	0	0	8	0	0	0	0	0	0	0	0	0	0	0	0	0	0	0	0	0	0	0	0	0	0	0	0	0	0	0	11.5085	0	0	0	0	1.20634	6.43878	0	0	0	0	11.9403	0
MH0035.scaffold97143_1	19882	4	4			0	0	0	2	0	0	0	0	0	0	0	0	0	0	0	0	0	0	0	0	0	0	0	0	0	0	0	0	0	0	0	0	0	0	0	0	0	5.67565	0	0	0	0	0	0
MH0036.scaffold14124_7	24290	10	10			1	1	0	27	0	2.36436	0	0	3.81619	0.429994	0	0	0	0	0	0.831097	0	4.19916	0	0	0	0	0	0	2.82872	0	0	0	1.36051	0	2.98881	0	0	0	0	1.20319	0	1.828	3.75261	3.43616	2.68008	0	0	0
MH0036.scaffold3873_4	37933	9	9		Bacteroides_cellulosilyticus_DSM_14838	0	1	1	77	0	0	20.528	0	0	0	2.75355	2.87669	1.78786	18.6584	5.06967	2.08689	0	0	0	0	11.5052	2.9795	0	0	0	0	0	17.1936	1.91233	0	8.44008	0.990953	0	0	1.30059	5.30066	4.19433	3.88324	6.93602	0	17.952	3.63486	0	47.4999
MH0036.scaffold87240_2	11627	7	7			0	0	0	1	0	0	0	0	0	0	0	0	0	0	0	0	0	0	0	0	0	0	0	0	0	0	0	0	0	0	0	0	0	0	0	0	0	0	7.8401	0	0	0	0	0
MH0036.scaffold89379_1	24554	10	9			0	0	0	5	0	0	0	0	0	0	0	0	0	0	0	0	0	0	0	0	0	0	0	0	0	0	0	0	0	0	0	0	0	0	0	0	0	0	7.86087	0	0	0	0	0
MH0037.scaffold1344_4	19166	8	8			0	0	0	1	0	0	0	0	0	0	0	0	0	0	0	0	0	0	0	0	0	0	0	0	0	0	0	0	0	0	0	0	0	0	0	0	0	0	0	8.36629	0	0	0	0
MH0037.scaffold1380_1	12808	2	1			0	0	0	30	0	4.52444	0	0	0	1.80306	1.03096	0	1.3582	0	0.929924	5.25454	0	0	0	0	0	0	0	0	0	3.34247	0	1.64574	0	0	2.63265	2.1817	1.98416	1.36242	0	1.47688	0	0	1.04752	10.7842	0	5.03209	0	0
MH0037.scaffold27675_1	26231	12	11			0	0	0	3	0	0	0	0	0	0	0	0	0	0	0	0	0	0	0	0	0	0	0	0	0	0	0	0	0	0	0	0	0	0	0	0	0	0	0	9.20887	0	0	0	0
MH0037.scaffold27675_8	21137	36	22			0	0	0	2	0	0	0	0	0	0	0	0	0	0	0	0	0	0	0	0	0	0	0	0	0	0	0	0	0	0	0	0	0	0	0	0	0	0	0	8.55974	0	0	0	0
MH0037.scaffold33786_1	15589	59	27			0	0	0	3	0	0	0	0	0	0	0	0	0	0	0	0	0	0	0	0	0	0	0	0	0	0	0	0	0	0	0	1.36688	0	0	0	0	0	0	0	9.90289	0	0	0	0
MH0037.scaffold34132_2	13963	4	3	Dialister_invisus_DSM_15470_33143		0	0	0	7	0	0	0	0	0	0	0	4.72582	0	0	0	0	0	0	0	0	0	0	0	0	0	0	0	0	0	0	0	0	0	0	0	7.23151	0	0	0	5.78688	0	0	7.22692	0
MH0037.scaffold3610_7	14058	1	1			0	0	0	13	0	0	0	0	0	0.920395	0.83423	0	0	0	0	0	0	1.26359	0	0	0	0	0	0	0	0	0	1.27635	0	0	0	0	3.83853	0	0	2.24291	0	0	0	14.0296	0	0	0	0
MH0037.scaffold397_7	26572	33	19			0	0	0	5	0	0	0	0	0	0	0	0	0	0	0.64296	0	0	0	0	0	0	0	0	0	0	0	0	0	0	0	0	0	0	0	0.706394	0	0	0	0	5.85469	0	0	0	0
MH0037.scaffold3994_1	13083	5	5			0	0	0	1	0	0	0	0	0	0	0	0	0	0	0	0	0	0	0	0	0	0	0	0	0	0	0	0	0	0	0	0	0	0	0	0	0	0	0	10.3831	0	0	0	0
MH0037.scaffold46033_2	15087	4	4			1	1	0	26	1.24528	2.31029	0	0	4.65639	0.531408	0	0	1.50707	16.4362	0.791565	0.817784	0	5.17602	0	0	0	0	0	0	0	0	0	0	1.23985	0	3.21547	0	0	0	2.34859	0	0	1.64596	0	6.49426	2.51138	0	0	0
MH0037.scaffold4756_2	15441	1	1			0	0	0	5	0	0	0	0	0	0	0	0	0	0	0	0.246292	0	0	0	0	0	0	0	0	0	0	0	0	10.9306	0	0	0	0	0	0	0	0	0	0	6.40879	0	0	0	0
MH0037.scaffold5827_2	13666	13	8			0	0	0	8	0	0	0	0	0	0	0	5.38094	0	0	0	0	0	0	0	0	0	0	0	0	0	0	0	0	0	0	0	0	0	0	0	7.94235	0	0	0	6.29286	0	0	9.54274	0
MH0037.scaffold69436_5	33502	1	1			0	0	0	3	0	0	0	0	0	0	0	0	0	0	0	0	0	0	0	0	0	0	0	0	0	0	0	0	0	0	0	0	0	0	0	0	0	0	0	4.71888	0	0	0	0
MH0037.scaffold73174_1	56871	27	19	Bacteroides_sp._4_3_47FAA_32443	Bacteroides_vulgatus_PC510	0	0	0	13	0	0	0	0	0	1.82169	0	0	0.400393	5.39666	0	0	0	3.31712	0	0	0	0	0	0	0	0	0	0	4.10204	0	0	0	0	0	0	0	0	0	1.63957	11.5409	3.5924	10.9576	0	0
MH0037.scaffold76389_1	13322	56	32			0	0	0	5	0	0	0	0	0	0	0	0	0	0	0	0	0	0	0	0	0	0	0	0	0	0	0	0	0	0	0	1.3821	0	0	0	0	0	1.2171	0	9.38231	0	0	0	0
MH0037.scaffold79471_1	10959	25	19			1	0	0	5	0	0	0	0	0	0	0	0	0	0	0	0	0	0	0	0	0	0	0	0	0	0	0	0	0	0	0	0	0	0	0	0	0	0	0	13.219	0	0	0	0
MH0037.scaffold838_3	21372	4	4			0	0	0	21	0	0	0	0	0	0	0	4.05725	0	0	2.86304	0	0	0	0	0	0	0	0	0	0	0	0	0	0	0	2.27177	0	0	0	0.72036	0	0	0	0	11.5699	0	2.6553	0	0
MH0037.scaffold938_4	15892	1	1		Bacteroides_fragilis_3_1_12	0	0	0	44	0	0	0	0	0	3.65045	5.66693	0	0	0	0	0	0	0	0	0	1.12843	2.0183	0	0	0	2.82154	0	4.06126	0	0	0	0	0	0	0	7.64647	0	1.06684	0	7.7	7.36652	5.07247	5.77781	20.6215
MH0038.scaffold1737_1	38639	1	1		Bacteroides_sp._2_1_33B	0	0	1	94	0	0.886031	1.69739	1.09858	0	0.697973	0	1.62673	0.944238	1.88401	1.22825	1.10978	0.872249	1.36077	0	2.10224	1.27298	1.60635	4.17278	14.2585	7.40375	0.914641	0	5.91628	3.28699	0	1.44871	4.08127	0	0.536561	0.841033	1.3579	0.827438	2.01059	0	0	6.26234	4.50776	0	1.20385
MH0038.scaffold18589_3	11017	1	1			0	0	0	30	0	0	0	0	0	1.21065	0	0	0	0	0	0.118793	0	0	4.76293	0	0	0	1.75525	0	6.9745	0	0	0	0	5.66076	1.37508	0	0.636127	0.693592	0	0.933315	0	6.47025	0.668489	0	3.62448	0	1.98375	0
MH0038.scaffold25033_2	24657	7	7			0	0	0	8	0	0	0	0	0	0.336531	0	0	0	0	0	0	0	0	0	0	0	0	0	0	2.29061	0	0	0	0	0	0	0	0	0	0	0	0	0	0	0	6.43469	0	0	0
MH0038.scaffold30542_2	30112	3	3		Bacteroides_sp._2_2_4	1	1	1	61	2.9974	0	7.77976	0	0	0	11.106	16.2412	2.86447	0	1.02877	0	5.61996	0	24.0316	0	0	4.50352	0	0	0	0	1.84804	0	0	17.985	10.2002	23.4671	0	0	0	5.17948	0	0	0	0	13.8437	2.80831	14.4589	29.9125
MH0038.scaffold35814_8	21332	3	3			0	0	0	26	0	0	0	0	0	0	0	0	0	0	0	0.131879	0	0.45048	3.60195	0	0	0	1.61794	0	8.36303	0	0	0	0	3.95801	1.29076	0	0	0	0	0.768052	0	6.411	0.673521	0	3.82705	0	2.04766	0
MH0038.scaffold42496_9	10430	5	4			0	0	0	3	0	0	0	0	0	0	0	0	0	0	0	0	0	0	0	0	0	0	0	0	0	0	0	0	0	0	0	0	0	0	0	0	0	0	0	0	9.94641	6.28684	0	0
MH0038.scaffold4663_2	19249	2	2			0	0	0	31	0	0	0	0	0	0.707838	0.985284	0	0	3.50151	0.410565	0	0	0	0	0	0	1.01206	0	0.909133	0	0	0	0	0	0.577734	0	0.583767	0	0	0	0	0	0	12.0916	0	5.06411	0	1.01345	1.62214
MH0038.scaffold5890_2	20350	43	20			0	0	0	17	0	0	0	0	0	2.27827	0	0	0	0	0	0.326006	0	0	0	0.989296	0	0	0	0	5.48659	0	0	0	0	0	0	0	0.624332	0	0	0	0	3.08076	0	0	8.01598	4.21064	0	0
MH0038.scaffold71_2	35654	4	3		Bacteroides_sp._2_1_7	0	0	0	3	0	0	0	0	0	0.830692	0	0	0	0	0	0	0	0	0	0	0	0	0	0	0	0	0	0	0	0	0	0	0	0	0	0	0	0	0	0	5.48486	0	0	0
MH0038.scaffold71865_1	12105	14	13			0	0	0	3	0	0	0	0	0	0	0	0	0	0	0	0	0	0	0	0	0	0	0	0	0	0	0	0	0	0	0	0	0	0	0	0	0	0	0	0	9.56822	6.39898	0	0
MH0039.scaffold12233_1	36252	12	10			0	0	0	9	0	2.59778	0	0	0	0	0	0	3.36348	0	0	0	0	0	0	0	0	0	0	0	0	0	0	0	0	0	0	10.0793	0	0	0	27.0564	0	0	0	0	0	7.80985	4.09743	0
MH0039.scaffold14107_1	18115	17	14	Roseburia_intestinalis_L1-82_30005		0	0	0	37	0	0	0.68404	0	0	0	3.65724	1.82866	0	3.8215	4.49057	0	0	0	0	1.24235	0	0	0	0	0	0	0	0	0	0	1.25755	0.634098	0	0	0.826024	0	0	0	0	0	0.408665	4.74603	0.557435	0
MH0039.scaffold21727_1	28539	34	24			1	0	0	8	0	0	12.0644	0	0	0	0	0	0	0	0	0	0	0	0	0	0	0	0	0	0	0	0	0	0	0	0	2.90321	0	0	0	7.90558	0	0	0	0	0	5.25509	0	0
MH0039.scaffold36657_6	33796	1	1			0	0	0	26	0	0.521004	0	0	0	0	2.44069	2.11064	0	0	0	0	15.4603	0	0	0	0	5.74199	0	0	5.64591	0	0	0	0	0	2.71812	0	0	0	0	1.18661	0	0	0	0	2.91039	6.42766	0	0
MH0039.scaffold49829_4	10612	29	15			0	0	0	6	0	0	0	0	0	0	0	0	0	0	0	0	0	0	0	1.47326	0	0	0	0	0	0	0	0	0	0	0	0	0	0	0	0	0	0	0	0	0	6.83352	0	0
MH0039.scaffold69202_2	47157	8	7			1	0	0	28	0	0	0	80.5347	1.92612	14.7597	0	0	0	0	0	30.5872	9.72633	15.9509	0	0	3.61749	0	39.1548	0	0	0	21.1866	10.262	0	76.0093	0	0	0	0	6.28338	20.7398	0	11.7991	0	0	0	5.7131	0	26.0859
MH0039.scaffold73819_3	14536	2	2		Bacteroides_sp._1_1_6	0	1	1	18	0	0	0	0	0	0	0	0	0	6.93643	0	0	0	0	0	0	0	1.61419	0	0	0	0	0	0	0	0	0	0.81617	0	0	0	0	0	0	0	0	2.36041	4.1394	0	0
MH0039.scaffold84301_1	12996	10	9			0	0	0	3	0	0	0	0	0	0	0	0	0	0	0	0	0	0	0	0	0	0	0	0	0	0	0	0	0	0	0	0	0	0	0	0	0	0	0	0	9.20343	6.47221	0	0
MH0039.scaffold84780_1	12611	4	4		Bacteroides_sp._4_3_47FAA	0	1	1	39	0	0	0	0	0	0	0	0	0	20.5362	0	0	0	0	0	0	10.3295	17.0221	0	0	0	4.75608	0	0	0	0	10.3762	4.16134	0	0	0	0	0	0	0	0	25.3232	9.08424	0	0
MH0039.scaffold86072_1	13317	19	13			0	0	0	7	0	0	0	0	0	0	0	0	0	0	0	0	0	0	0	1.63577	0	0	0	0	1.12417	0	0	0	0	0	0	0	0	0	0	0	0	0	0	0	0	6.50239	0	0
MH0039.scaffold86505_1	11547	2	2			0	0	0	9	0	2.54192	0	0	0	0	0	0	4.66673	0	0	0	0	0	0	0	0	0	0	0	0	0	0	0	0	0	0	12.1892	0	0	0	20.7674	0	0	0	0	0	8.32064	4.6149	0
MH0040.scaffold104579_1	32592	26	16	Bacteroides_sp._4_3_47FAA_32443		1	1	0	32	1.52857	0	0	0	0	2.51402	0	0	0	16.6789	0	0	0	11.5235	6.05312	0	23.0141	5.3723	0	0	0	0	0	0	0	0	5.5127	0	0	0	0	21.5913	0	3.71214	0	0	3.82635	13.2201	8.38898	9.62322
MH0040.scaffold105584_1	22105	23	16			0	0	1	27	0	0	0	0	0	1.8146	0	0	0	0	0	0	1.98415	0	0	0	0	12.5666	0	0	0	0	0	0	0	0	0	0	0	0	3.53903	4.85205	0	0	0	0	2.00579	2.60755	7.2356	0
MH0040.scaffold11546_1	40200	2	2			0	0	0	2	0	0	0	0	0	0	0	0	0	0	0	0	0	0	0	0	0	0	0	0	0	0	0	0	0	0	0	0	0	2.22509	0	0	0	0	0	0	0	0	5.3723	0
MH0040.scaffold23751_4	29745	9	9			0	0	0	33	0	1.14483	1.62373	0	0	0.25129	0	0	0	0	0	0.505369	0	0	0	0.813011	1.24777	0	0	1.88633	0	0	0.950043	0	1.15651	0	0	0	0	0	0.703677	0	0	0	0	0	0	0	7.30655	1.4518
MH0040.scaffold3535_1	25958	3	3			0	0	0	2	0	0	0	0	0	0	0	0	0	0	0	0	0	0	0	0	0	0	0	0	0	0	0	0	0	0	0	0	0	1.90081	0	0	0	0	0	0	0	0	4.72262	0
MH0040.scaffold35825_2	12910	1	1			0	0	0	5	0	0	0	0	0	0	0	0	0	0	0	0	0	0	0	0	0	0	0	0	0	0	0	0	0	0	0	0	0	0	0	13.3507	0	0	0	0	0	0	8.5026	0
MH0040.scaffold77193_1	14422	1	1		Bacteroides_sp._D20	0	0	0	3	0	10.0458	0	0	0	0	0	0	0	0	0	0	0	0	0	0	0	0	0	0	0	0	0	0	0	0	0	0	0	0	0	0	0	0	0	0	0	0	8.42108	0
MH0040.scaffold7979_1	19011	9	8			0	0	0	13	0	0	0	0	0	0	0	0	0.828047	11.6469	0	0	0	0	0	0	0	3.15362	0	0	0	0	0	0	1.39253	0	0	0	0	0	0	0	0	0	0	0	0	0	5.40515	0
MH0041.scaffold10213_7	12275	4	4		Bifidobacterium_adolescentis_L2-32	0	0	0	5	0	0	0	0	0	0	0	0	0	0	0	0	0	0	1.23931	0	0	0	0	0	0	0	0	0	0	0	0	0	0	0	0	0	0	0	0	0	0	0	0	6.88286
MH0041.scaffold10949_3	31148	6	4		Bifidobacterium_adolescentis_L2-32	0	0	0	2	0	0	0	0	0	0	0	0	0	0	0	0	0	0	0	0	0	0	0	0	0	0	0	0	0	0	0	0	0	0	0	0	0	0	0	0	0	0	0	6.02562
MH0041.scaffold11898_1	31423	25	19		Eubacterium_ventriosum_ATCC_27560	0	0	0	38	0	0	0	0	0	0.606245	1.16903	0	1.00955	0	0	0.709045	0.779459	0.635839	2.08182	0	0	0	0	0	0	1.16784	0	1.49658	0	0	0	0	0	0	0	0	1.0534	0	2.26798	0	0.999472	0.453458	0	4.60526
MH0041.scaffold15118_1	13147	2	2			0	0	0	4	0	0	0	0	0	0.402635	0	0	0	0	0	0	0	0	0	0	0	0	0	0	0	0	0	0	0	0	0	0	0	0	0	0	0	0	0	0	0	0	0	7.52043
MH0041.scaffold20586_6	16145	5	5			0	0	0	7	0	0	0	0	0	0	0	0	0	0	0	0	0	0	1.96454	0	0	0	0	0	0	0	0	0	0	0	0	0	0	0	0	0	0	0	0	0	0	0	0	4.97989
MH0041.scaffold6276_1	11789	10	8	Bifidobacterium_adolescentis_L2-32_18197	Bifidobacterium_adolescentis_L2-32	0	0	0	8	0	0	0	0	0	0	0	0	0	0	0	0	1.82729	0	0	0	0	0	0	0	0	0	0	0	0	0	0	0	0	0	0	0	0	0	0	0	0	0	0	5.45938
MH0041.scaffold80004_7	14133	13	12			0	0	0	1	0	0	0	0	0	0	0	0	0	0	0	0	0	0	0	0	0	0	0	0	0	0	0	0	0	0	0	0	0	0	0	0	0	0	0	0	0	0	0	4.34808
MH0042.scaffold13955_5	14241	3	3			0	1	0	12	0	0	0	0	0	0.62848	3.272	0	0	0	0	0.304691	0	0	0	0	0	0	0	0	0	0	0	0	0	0	1.35548	0	0	0	0.853141	0	0	1.34711	0	0	0	0	0	0
MH0042.scaffold16361_1	34173	5	5		Eubacterium_siraeum_DSM_15702	0	0	0	11	0	0	0	0	0	0	0	0	16.9001	0	0	0	0	0	0	0	0	0	0	0	0	0	0	0	0	0	0	0	0	0	0	21.3572	0	0	0	0	0	0	0	0
MH0042.scaffold21573_1	17458	4	3			0	0	0	2	0	0	0	0	1.90163	0	0	0	0	0	0	0	0	0	0	0	0	0	0	0	0	0	0	0	0	0	0	0	0	0	0	0	0	0	0	0	0	0	0	0
MH0042.scaffold21573_2	19461	2	2			0	0	0	1	0	0	0	0	0	0	0	0	0	0	0	0	0	0	0	0	0	0	0	0	0	0	0	0	0	0	0	0	0	0	0	0	0	0	0	0	0	0	0	0
MH0042.scaffold29538_1	16144	1	1		Eubacterium_siraeum_DSM_15702	0	0	0	37	0	12.6124	2.32967	0	1.17234	0	0	0	17.0566	0	0	0	1.39997	0	1.27361	3.58375	0	0	0	0	0	0	0	0	0	0	1.68092	0	0	8.53675	0	21.8124	0	0	1.11341	0	21.0856	0.735998	6.37372	0
MH0042.scaffold31955_3	11363	1	1			0	0	0	2	0	0	0	0	0	0	0	0	0	0	0	0	0	0	0	0	0	0	0	0	0	0	0	0	0	0	0	0	0	0	0	0	0	0	0	0	0	0	0	0
MH0042.scaffold34549_1	10307	4	2			0	0	0	6	0	0	0	0	0	0	0	0	0	0	0	12.8472	0	0	0	0	0	0	0	0	0	0	0	0	0	0	0	0	0	0	0	0	0	0	0	0	0	0.585245	0	0
MH0042.scaffold37563_2	10967	1	1			0	0	0	3	0	0	98.2276	0	0	0	0	0	0	0	0	0	0	0	0	0	0	0	0	0	0	0	0	0	0	0	0	0	0	0	0	0	0	0	0	0	0	0	0	0
MH0042.scaffold38994_2	54065	9	6		Bacteroides_stercoris_ATCC_43183	1	1	0	35	1.77141	0	37.7534	4.96903	3.68306	0	1.75058	0	1.7591	0	0	0	0	0	0	5.9554	16.0684	0	0	5.28846	0	0	0	0	15.4057	1.50197	0	18.3646	0	0	0	0	0	0	0	0	0	0	15.0868	9.79427
MH0042.scaffold8772_3	14973	4	2			0	0	0	6	0	0	0	0	0	0	0	0	0	0	0	0.231254	48.9841	0	0	0	0	0	0	0	0	0	0	0	0	0	0	0	0	0	0	0	0	0	0	0	0	0	0	0
MH0043.scaffold13467_4	21283	5	4			0	1	0	25	0	0	0	0	0	0.814392	0	0	1.1997	0	0.906907	0.864525	0	0	0	0	0	0	0	0	0	0	0	0	4.3317	0	0	0	0	3.7969	1.75908	1.5722	0	0	1.88066	0	0	2.78641	0	1.07274
MH0043.scaffold13467_5	12354	1	1			0	1	0	60	0.700248	0	0	0	3.69195	2.40702	1.75844	0	1.44364	1.15144	1.03619	1.60559	0.884441	0	0	0	0	0	0	0	0	2.41748	0	1.00674	4.87543	0	0	0	1.30582	5.45737	1.85818	2.99627	0.609435	0	3.57829	0	1.24773	4.37089	0.569907	1.32216
MH0043.scaffold14760_5	16766	5	5			0	0	0	20	0	0	0	0	0	0	0	0	1.55992	0	0	0	4.96915	0	0	0	0	0	0	0	0	0	0	1.06027	0.822252	0	0	0	0	0	0	2.09591	0	0	0.810935	0	0	0	0	0
MH0043.scaffold14760_8	16219	4	2			0	0	0	19	0	0	0	0	0	0	0	0	1.71317	0	0	0	3.7504	0	0	0	0	0	0	0	0	0	0	0.922807	0.777169	0	0	0	0	0	0	1.95936	0	0	0.807609	0	0	0	0	0
MH0043.scaffold34359_4	15920	2	2			0	0	0	8	0	0	129.867	0	0	0.52573	0	0	0	0	0	0	0	0	0	0	0	0	0	0	0	0	64.0182	0	0	0	0	0	0	0	0	0	0	0	0	0	0	0	0	5.52084
MH0043.scaffold39169_5	45269	11	9		Dialister_invisus_DSM_15470	0	0	0	3	0	0	0	0	0	0	0	0	0	0	0	0	0	0	0	0	0	0	0	0	0	0	0	0	0	0	0	0	0	0	0	0	0	0	0	0	0	0	0	0
MH0043.scaffold42498_1	11930	2	2			0	0	0	2	0	0	0	0	0	0	0	0	0	0	0	0	0	0	0	0	0	0	0	0	0	0	0	0	0	0	0	0	0	0	0	0	0	0	0	0	0	0	0	0
MH0043.scaffold64877_4	31296	16	10			0	0	0	5	0	0	0	0	0	0	0	0	0	0	0	0	0	0	0	0	0	0	0	0	0	0	0	0	0	0	0	0	2.63523	0	0	0	0	0	0	0	0	0	0	0
MH0044.scaffold12287_6	15327	1	1			0	0	0	30	0	0	0	0	0	0	0	0	0.440188	0	0	0.243488	0	0.810226	0	0	0	0	3.03464	0	11.0312	0	0	0.707114	0	3.87431	1.81853	0	0	0	0	1.36116	0	8.40039	0.952943	0	6.88682	0	2.92877	0
MH0044.scaffold14186_2	35614	2	2			0	0	0	13	0	0	0	2.44658	0	0	0	0	0	0	0	0	0	0	0	0	0	0	0	0	0	0	0	0	0	0	0	0	0	1.55281	0	0	0	0	0	0	0	0	1.97623	0
MH0044.scaffold1765_5	17938	7	5			0	1	0	41	2.41316	0	6.22153	2.21036	0	0	0	0	0	0	0	0.443199	0	2.68171	6.88879	0	9.94616	0	0	0	0	0	0	0	0	0	3.38135	0	4.89981	0	1.92929	0.525111	0	0	2.02254	0	0.637569	0	0	0
MH0044.scaffold19488_2	16854	16	14			0	1	0	32	2.72714	0	7.88136	2.70292	0	0	0	0	0	0	0	0.464052	0	0	4.53227	0	8.15467	0	0	0	0	0	0	0	0	0	2.82692	0	0.979093	0.557944	2.10458	0	0	0	2.71873	0	0	0	0	0
MH0044.scaffold4626_2	17850	1	1			0	0	0	16	0	0	0	0	0	0	0	0	0	0	0	0	0	0	0	0	0	0	0	0	0	0	0	0	0	0	0	0	6.92286	0	0	0.745266	0	0	1.05869	0	0	0	0	0
MH0044.scaffold47723_4	16327	2	2			0	0	0	1	0	0	0	0	0	0	0	0	0	0	0	0	0	0	0	0	0	0	0	0	0	0	0	0	0	0	0	0	0	0	0	0	0	0	0	0	0	0	0	0
MH0044.scaffold50832_1	20577	1	1			0	0	0	1	0	0	0	0	0	0	0	0	0	0	0	0	0	0	0	0	0	0	0	0	0	0	0	0	0	0	0	0	0	0	0	0	0	0	0	0	0	0	0	0
MH0044.scaffold50832_2	16376	13	12			0	0	0	1	0	0	0	0	0	0	0	0	0	0	0	0	0	0	0	0	0	0	0	0	0	0	0	0	0	0	0	0	0	0	0	0	0	0	0	0	0	0	0	0
MH0044.scaffold55618_1	21283	31	23			0	0	0	1	0	0	0	0	0	0	0	0	0	0	0	0	0	0	0	0	0	0	0	0	0	0	0	0	0	0	0	0	0	0	0	0	0	0	0	0	0	0	0	0
MH0044.scaffold55618_2	33509	36	24			0	0	0	1	0	0	0	0	0	0	0	0	0	0	0	0	0	0	0	0	0	0	0	0	0	0	0	0	0	0	0	0	0	0	0	0	0	0	0	0	0	0	0	0
MH0044.scaffold6458_1	12244	9	3			0	0	0	7	0	0	0	0	0	0	0	0	0	0	0	0	0	0	0	0	0	0	0	0	0	0	0	0	0	0	0	0	0	0	0	0	0	0	0	0	0	0	0	0
MH0044.scaffold71348_2	37052	5	5			0	0	0	1	0	0	0	0	0	0	0	0	0	0	0	0	0	0	0	0	0	0	0	0	0	0	0	0	0	0	0	0	0	0	0	0	0	0	0	0	0	0	0	0
MH0044.scaffold73060_5	15482	1	1			0	0	0	5	0	0	0	0	0	0	0	0	0	0	0	0	0	0	0	0	0	0	0	0	0	0	0	0	0	0	0	0	0	0	0	0	0	0	0	1.27904	4.12976	1.22592	0	0
MH0045.scaffold13359_4	30940	4	4			0	0	0	1	0	0	0	0	0	0	0	0	0	0	0	0	0	0	0	0	0	0	0	0	0	0	0	0	0	0	0	0	0	0	0	0	0	0	0	0	0	0	0	0
MH0045.scaffold15276_3	13136	4	3			0	0	0	13	0	0	0	0	0	0	0	0	0.768679	9.0118	0	0	0	0	0	0	0	2.35489	0	0	0	0	0	0	1.38883	0	0	0	0	0	0	0	0	0	0	0	0	0	2.86428	0
MH0045.scaffold16782_10	12003	10	9			1	1	0	44	1.12136	2.34058	0	0	4.71328	0.323398	6.15585	0	2.52118	17.2953	0.849601	0.65561	0	7.03639	0	1.05803	0	2.41366	0	0	6.72295	0	0	0	1.48459	0	4.34812	0	0	0.760601	3.05693	1.42333	0	1.98736	2.40058	1.75643	2.74634	0	0	0
MH0045.scaffold16782_15	12118	2	2			1	0	0	41	1.49182	2.70492	0	0	6.57971	0.192298	3.9731	0	1.43104	13.7059	1.08339	0.732552	0	5.7449	0	1.09579	0	0.868354	0	0	9.37513	0	0	0	1.74732	0	5.8605	0	0	0	3.91746	1.50133	0	1.99941	2.66964	2.52886	3.73999	0	0	0
MH0045.scaffold18909_2	11917	4	4			0	0	0	15	0	0	0	0	0	0	0	0	0.756497	3.83253	0	0.212681	0	0	0	0	0	0	0	0	0	0	0	0	0	0	0	0	0	0	0	0.525793	0	0	0	0	0	0	0	0
MH0045.scaffold24934_1	10686	2	2			0	0	0	5	0	0	0	0	0	0	0	0	0	0	0	0	0	0	0	0	0	0	0	0	0	0	0	0	0	0	0	0	0	0.474837	0	0	0	0	0	0	0	0	0	0
MH0045.scaffold35413_1	12099	14	14			0	0	0	3	0	0	0	0	0	1.57015	0	0	0	0	0	0	0	0	0	0	0	0	0	0	0	0	0	0	0	0	0	0.764797	0	0	0	0	0	0	0	0	0	0	0	0
MH0045.scaffold39387_1	38910	6	5			0	0	0	17	0	0	0	0	0	0	0	0	1.19419	0	0	0	0	0	1.59995	0	0	0	0	0	0	0	0	0	0	0	0	0	0	1.27792	0	0	0	0	1.81816	0	0.693213	0	1.09088	0
MH0045.scaffold7081_3	18186	1	1			0	0	0	22	0	0	0	0.659655	0	0	0	0	0	0	0	0	0	0	0	0	0	0	0	0	0	0	0	0	0	0.721594	0	0	0	0	2.27522	1.40146	0	0	0.593342	0	0	3.20647	0	0
MH0045.scaffold79977_1	20921	67	24			1	0	0	3	0	0	0	0	0	0	0	0	0	0	0	0	0	0	0	0	0	0	0	0	0	0	0	0	0	0	0	0	0	0	0	0	0	0	0	0	0	0	0	0
MH0045.scaffold84302_1	11180	14	9			0	0	0	1	0	0	0	0	0	0	0	0	0	0	0	0	0	0	0	0	0	0	0	0	0	0	0	0	0	0	0	0	0	0	0	0	0	0	0	0	0	0	0	0
MH0046.scaffold59362_3	14214	2	2			0	0	0	15	0	2.56394	0	0	2.55941	0	0	0	0	0	1.67503	0	0	0	0	0	0	0	0	0	0	0	0	0	0	0	0	0	0	0	0	1.09228	0	0	0	0	0	0	1.22313	0
MH0046.scaffold6970_11	15225	3	3			0	0	0	3	0	0	0	0	0	0	0	0	0	0	0	0	0	0	0	0	0	0	0	0	0	0	0	0	0	0	0	0	0	0	0	0	1.01548	0	0	0	0	0	0	0
MH0046.scaffold81508_2	44832	14	10		Coprococcus_eutactus_ATCC_27759	0	0	0	1	0	0	0	0	0	0	0	0	0	0	0	0	0	0	0	0	0	0	0	0	0	0	0	0	0	0	0	0	0	0	0	0	0	0	0	0	0	0	0	0
MH0046.scaffold81544_2	31929	6	5			0	0	0	5	0	0	0	0	0	1.00022	0	0	0	0	0	0	0	0	0	0	0	0	0	0	0	0	0	0	0	0	0	0	0	0	0	0	0	0	0	0	0	0	0	0
MH0048.scaffold38030_1	18542	19	16			0	1	0	18	0	0	0	0	0	0	0	0	0	14.5122	0	0.495918	0	0	16.5564	0	0	0	0	0	0	0	0	0	0	0	0	2.21124	0	0	0	0	0	0	0	4.52822	0	1.80919	0	0
MH0048.scaffold42622_1	10684	1	1			0	0	0	3	0	0	0	0	0	0	0	0	0	0	0	0	0	0	0	0	0	0	0	0	0	0	0	0	0	0	0	0	0	0	0	0	0	0	0	0	13.408	0	0	5.44267
MH0048.scaffold5212_1	15274	2	1			0	0	0	4	0	0	0	0	0	0	0	0	0	0	0	0	0	0	0	0	0	0	0	0	0	0	0	0	0	0	0	0	0	0	0	0	0	0	0	0	0	0	0	0
MH0048.scaffold67133_2	18041	1	1			0	0	0	4	0	0	0	0	0	0	0	0	0	0	0	0	0	0	0	0	0	0	0	0	0	0	0	0	0	0	0	0	0	0	0	0	0	0	0	0	0	0	0	0
MH0049.scaffold1035_1	13410	7	6			0	0	0	1	0	0	0	0	0	0	0	0	0	0	0	0	0	0	0	0	0	0	0	0	0	0	0	0	0	0	0	0	0	0	0	0	0	0	0	0	0	0	0	0
MH0049.scaffold1508_1	10364	1	1		Clostridium_difficile_NAP08	0	0	1	120	2.67863	6.00109	65.0028	34.0811	0	2.52883	3.45263	5.2246	22.249	19.6622	10.3517	36.6417	13.5796	39.3586	5.58073	23.8239	10.8339	0	21.5215	7.29548	12.0711	46.9122	3.87687	21.5008	29.8846	5.61339	19.4713	24.3678	10.3049	12.7837	1.65807	27.5059	0	4.76698	53.5713	35.8554	17.1019	6.50447	15.5517	3.40372
MH0049.scaffold15494_2	15329	4	3			1	0	0	5	0	0	0	0	0	0	0	0	0	0	0	0	2.12427	0	0	0	0	0	0	0	0	0	43.5439	0	0	0	0	0	0	0	0	0	0	0	0	0	0	0	0	0
MH0049.scaffold15669_1	36431	13	6		Bacteroides_vulgatus_PC510	1	1	1	68	2.44616	0	7.5284	1.11195	0	0	17.4053	15.8727	3.03438	0	1.0592	0	5.06298	12.8134	21.911	0	0	0	0	0	0	1.21258	2.366	0	0	23.7836	13.3847	17.7134	0	1.21265	0	8.1794	0	0	0	0	19.6734	2.67534	11.8183	25.7793
MH0049.scaffold29324_1	11562	11	10			0	0	0	2	0	0	0	0	0	0	0	0	0	0	0	0	0	0	0	0	0	0	0	0	0	0	4.3103	0	0	0	0	0	0	0	0	0	0	0	0	0	0	0	0	0
MH0049.scaffold6358_2	19402	19	12		Bacteroides_sp._3_1_33FAA	0	0	1	40	0	0	0	0	0	3.37121	0	0	0	0	0	0	1.94638	0	0	0	0	14.6765	0	0	0	0	0	0	0	0	5.0986	1.48698	0	0.431071	4.4294	5.40611	0	0	1.8466	1.40979	2.25135	2.96648	6.46583	0
MH0049.scaffold6460_1	29049	5	4			1	1	0	8	0	0	0	0	0	0	0	0	0	0	0	3.75991	0	0	0	0	0	0	0	0	0	0	0	0	0	0	4.23712	6.06334	0	0	0	0	0	0	0	0	0	0	0	0
MH0050.scaffold7168_1	22660	19	12		Clostridium_bolteae_ATCC_BAA-613	0	1	0	54	10.5667	8.88636	0.873037	0	1.55551	3.71904	11.7607	0	0.445483	16.0325	1.67812	0.222182	0	0	0	0	0	0	0	2.20074	0	0	0	1.02157	2.15541	11.5284	0	0	7.07044	10.8982	0	0	0.580847	0	1.44115	0.799151	0.517613	0.754228	0.400071	16.4566
MH0050.scaffold85543_1	15857	6	6			0	0	0	1	0	0	0	0	0	0	0	0	0	0	0	0	0	0	0	0	0	0	0	0	0	0	0	0	0	0	0	0	0	0	0	0	0	0	0	0	0	0	0	0
MH0050.scaffold92392_2	16482	1	1			0	0	0	2	0	0	0	0	0	0	0	0	0	0	0	0	0	0	0	0	0	0	0	0	0	0	0	0	0	0	0	0	0	0	0	0	0	0	0	0	0	0	0	0
MH0051.scaffold59789_1	22887	2	2			0	0	0	1	0	0	0	0	0	0	0	0	0	0	0	0	0	0	0	0	0	0	0	0	0	0	0	0	0	0	0	0	0	0	0	0	0	0	0	0	0	0	0	0
MH0053.scaffold100213_1	11029	1	1			0	0	0	8	0	0	0	0	0	0	0	0	10.8896	0	0	0	0	0	0	0	0	0	0	0	0	0	0	0	0	0	1.32892	0	0	0	0	0	0	0	0	0	0	0	0	0
MH0053.scaffold100369_1	32841	4	2			0	0	0	31	3.47064	0	0	0	0	1.44307	2.26008	0	0.813379	0	0	0	0	0	0	0	0	0	0	0.657984	0	0	0	0	0	0	0	2.21613	1.58815	0	0	1.65893	0	0	0	0	0	0	0	0.957496
MH0053.scaffold12089_1	14927	3	2			0	0	0	2	0	0	0	0	0	0	0	0	0	0	0	0	0	0	0	0	0	0	0	0	0	0	0	0	0	0	0	0	0	0	0	0	0	0	0	0	0	0	0	0
MH0053.scaffold2202_7	29327	20	15		Roseburia_intestinalis_L1-82	0	1	0	11	0	0	0	0	0	0	0	0	0	0	0	0	0	0	0	3.29011	0	0	0	0	0	5.44117	0	0	0	0	1.24694	0	0	0	0	0	0	0	0	0	0	0	0	0
MH0053.scaffold25914_1	44001	3	3			0	0	0	1	0	0	0	0	0	0	0	0	0	0	0	0	0	0	0	0	0	0	0	0	0	0	0	0	0	0	0	0	0	0	0	0	0	0	0	0	0	0	0	0
MH0053.scaffold26177_4	26359	7	3			0	0	0	1	0	0	0	0	0	0	0	0	0	0	0	0	0	0	0	0	0	0	0	0	0	0	0	0	0	0	0	0	0	0	0	0	0	0	0	0	0	0	0	0
MH0053.scaffold52989_1	20508	2	2			0	0	0	7	0	4.41892	0	0	0	0	11.1415	0	0	0	0	0	0	2.90422	0	0	0	0	0	0	0	0	0	0	0	0	0	0	0	0	0	0	0	0	3.77131	0	0	0	0	0
MH0053.scaffold54183_5	39715	4	3			0	0	0	1	0	0	0	0	0	0	0	0	0	0	0	0	0	0	0	0	0	0	0	0	0	0	0	0	0	0	0	0	0	0	0	0	0	0	0	0	0	0	0	0
MH0053.scaffold54386_1	21791	56	31			0	0	0	46	1.5454	1.06823	2.52622	0	0	1.46844	2.42537	0	0	0	0	0	1.03042	0.514246	0	0	3.86589	0	0	0	4.23681	9.31637	3.51024	12.8663	0	1.53712	0	4.17085	0	0	0	0.952278	0	0.467193	0	0	0	0	7.20546	0
MH0053.scaffold75965_2	24403	1	1			0	0	0	2	0	0	0	0	0	0	0	0	0	0	0	0	0	0	0	0	0	0	0	0	0	0	0	0	0	0	0	0	0	0	0	0	0	0	0	0	0	0	0	0
MH0053.scaffold82586_1	46151	7	3			0	0	0	5	0	0	0	0	0	3.29593	0	0	1.72044	0	0	0	0	0	0	0	0	0	0	0	0	0	0	0	0	0	0	0	0	0	0	0	3.60372	0	0	0	0	0	0	0
MH0053.scaffold90432_7	18096	2	2			0	0	0	3	0	0	0	0	0	0	0	0	0	0	0	0	0	0	0	0	0	0	0	0	0	0	0	0	0	0	0	0	1.16878	0	0	0	0	0	0	0	0	0	0	0
MH0053.scaffold96661_1	16986	4	3			0	0	0	6	0	0	0	0	0	0	0	0	10.163	0	0	0	0	0	0	0	0	0	0	0	0	0	0	0	0	0	1.27947	0	0	0	0	0	0	0	0	0	0	0	0	0
MH0054.scaffold15747_1	80089	4	4			0	0	0	3	0	2.96463	0	0	0	0	0	0	0	0	0	0	11.3988	0	0	0	0	0	0	0	0	0	0	0	0	0	0	0	0	0	0	0	0	0	0	0	0	0	0	0
MH0054.scaffold21476_13	19787	8	6		Alistipes_putredinis_DSM_17216	0	1	0	29	0	9.56472	0	0	0	0	0	0	0	0	0	0	3.516	0	0	5.46632	0	0	0	0	0	0	0	0	2.24693	0	2.59611	3.70772	0	0	6.78293	0	0	0	0	0	0	0	5.9837	0
MH0054.scaffold22733_2	46935	3	2			0	0	0	1	0	0	0	0	0	0	0	0	0	0	0	0	0	0	0	0	0	0	0	0	0	0	0	0	0	0	0	0	0	0	0	0	0	0	0	0	0	0	0	0
MH0054.scaffold27232_2	14053	5	3			0	0	0	1	0	0	0	0	0	0	0	0	0	0	0	0	0	0	0	0	0	0	0	0	0	0	0	0	0	0	0	0	0	0	0	0	0	0	0	0	0	0	0	0
MH0054.scaffold30060_2	30822	2	2			0	0	0	15	0	0	0	0	0	1.0546	1.84232	0	0	0	0	0	0	0	0	0	0	0	0	0	0	0	0	0	0	0	0	1.6709	1.20274	0	0	1.65566	0	0	0	0	0	0	0	1.14749
MH0054.scaffold33872_1	12992	3	2			0	0	0	6	0	0	0	0	0	0	0	0	5.26687	0	0	0	0	4.04798	0	0	0	0	0	0	0	0	0	0	2.09044	0	0	0	0	0	0	0	0	0	0	0	0	0	0.488178	0
MH0054.scaffold3636_5	15339	2	2			0	0	0	58	0	0	0	3.52656	8.07438	3.43588	6.32654	0	2.56958	3.33842	2.77994	2.43567	3.62718	5.23396	0	0	5.13384	0	1.30034	0	0	0	6.90362	2.44882	4.74844	1.95166	0	1.00696	5.62835	2.19736	0.672212	13.8627	0	0.807821	2.10194	2.56847	1.51183	0.871447	0.829554	0
MH0054.scaffold58693_1	35007	2	2			0	0	0	3	0	0	1.18612	0	0	0	0	0	0	0	0	0	0	0	0	0	0	0	0	0	0	0	0	0	0	0	0	0	0	0	0	0	0	0	0	0	0	0	0	0
MH0054.scaffold67824_4	15140	6	6			0	0	0	1	0	0	0	0	0	0	0	0	0	0	0	0	0	0	0	0	0	0	0	0	0	0	0	0	0	0	0	0	0	0	0	0	0	0	0	0	0	0	0	0
MH0054.scaffold82112_1	19390	7	6			0	0	0	1	0	0	0	0	0	0	0	0	0	0	0	0	0	0	0	0	0	0	0	0	0	0	0	0	0	0	0	0	0	0	0	0	0	0	0	0	0	0	0	0
MH0054.scaffold943_20	31102	7	6			1	1	0	43	1.44974	2.70605	0	0	5.57337	0.367089	1.981	0	2.04416	18.9205	0.871747	0.901809	0	7.58587	0	0.569848	0	2.25305	0	0	3.64402	0	0	0	1.70574	0	4.98465	0	0	0.630456	3.14052	1.74873	0	2.1608	2.75358	2.25013	3.25086	0	0	0
MH0055.scaffold1470_2	32918	2	2			0	0	0	1	0	0	0	0	0	0	0	0	0	0	0	0	0	0	0	0	0	0	0	0	0	0	0	0	0	0	0	0	0	0	0	0	0	0	0	0	0	0	0	0
MH0055.scaffold1470_3	33041	8	7			0	0	0	1	0	0	0	0	0	0	0	0	0	0	0	0	0	0	0	0	0	0	0	0	0	0	0	0	0	0	0	0	0	0	0	0	0	0	0	0	0	0	0	0
MH0055.scaffold16561_16	30513	1	1			0	0	0	3	0	0	0	0	0	0	0	0	0	0	0	0	0	0	0	0	0	0	0	0	0	0	0	0	0	0	1.97571	0	0	0	0	0	0	0	0	0	0	0	0	0
MH0055.scaffold17878_4	15281	6	5			0	0	0	6	0	0	10.1685	0	0	0	0	0	0	0	0	0	0	0	0	0	0	0	0	0	0	0	0	0	0	0	0	0	0	0	0	0	0	0	0	0	0	0	0	0
MH0055.scaffold24912_1	50583	2	2		Bacteroides_vulgatus_PC510	0	1	1	87	0	0	31.8638	0	0	0	5.69914	5.22159	2.46513	22.3786	10.0008	2.7203	17.0421	0	0	0	21.311	5.80284	0	0	0	0	0	22.2905	4.67514	8.29399	11.5233	1.43426	0	0	1.62174	6.40341	11.0376	4.75805	6.55492	0	49.9428	10.5672	0	65.6183
MH0055.scaffold24912_2	13609	5	5		Bacteroides_vulgatus_PC510	0	1	1	48	0	0	11.8765	0	0	0	5.6104	4.53829	1.54599	0	6.35892	0	16.0781	0	0	0	21.3851	5.98929	0	0	0	0	0	0	3.49371	8.26039	5.98589	0	0	0	0	0	11.2591	3.12237	0	0	25.7776	6.15312	0	0
MH0055.scaffold38308_1	10993	10	9			0	0	0	3	0	0	0	0	0	0	0	0	0	0	0	0	0	0	0	0	0	0	0	0	0	0	0	0	0	0	0	0	0	0	0	0	0	0	0	3.72445	0	0	0	0
MH0055.scaffold38308_2	17200	4	4			0	0	0	3	0	0	0	0	0	0	0	0	0	0	0	0	0	0	0	0	0	0	0	0	0	0	0	0	0	0	0	0	0	0	0	0	0	0	0	3.16211	0	0	0	0
MH0055.scaffold53078_7	27502	1	1			0	0	0	2	0	0	0	0	0	0	0	0	0	0	0	0	0	0.700521	0	0	0	0	0	0	0	0	0	0	0	0	0	0	0	0	0	0	0	0	0	0	0	0	0	0
MH0055.scaffold60207_1	18702	3	3			0	0	0	1	0	0	0	0	0	0	0	0	0	0	0	0	0	0	0	0	0	0	0	0	0	0	0	0	0	0	0	0	0	0	0	0	0	0	0	0	0	0	0	0
MH0055.scaffold61741_3	10261	4	4			1	0	0	7	0	0	8.61106	0	0	0	0	0	0	0	0	0	0	0	0	0	0	0	0	0	0	0	0	0	0	0	0	0	0	0	0	0	0	0	0	0	0	0	0	0
MH0055.scaffold7306_1	16512	6	4			0	0	0	3	0	0	0	0	0	0.33451	0	0	0	0	0	0	0	0	0	0	0	0	0	0	0	0	0	0	0	0	0	0	0	0	0	0	0	0	0	0	0	0	0	0
MH0055.scaffold82928_1	34156	14	12		Butyrivibrio_crossotus_DSM_2876	0	0	0	2	0	0	0	0	10.1474	0	0	0	0	0	0	0	0	0	0	0	0	0	0	0	0	0	0	0	0	0	0	0	0	0	0	0	0	0	0	0	0	0	0	0
MH0055.scaffold83010_1	12607	4	2		Bacteroides_sp._D20	1	1	1	68	4.20767	0	9.49197	3.92498	0	0	11.8916	16.5772	1.9355	0	3.02159	0	6.54672	13.5249	23.3126	0	0	0	0	0	0	1.76093	4.4518	0	0	16.3372	16.0815	16.1424	0	2.26075	0	8.5906	0	0	0	0	21.335	5.99916	13.3212	23.9701
MH0056.scaffold21295_1	11803	4	4			0	0	0	8	0	0	0	0	0	0	0	0	0	0	0	0.149671	0	0	0	2.42013	0	0	0	0	0	0	0	0	0	0	0	0	0	0	0	0	0.507671	1.21559	0	0	0	0	0	0
MH0056.scaffold6096_2	11901	2	2			0	0	0	3	0	0	0	0	0	0	0	0	0	0	0	0	157.35	0	0	0	0	0	0	0	0	0	0	0	0	0	0	0	0	0	0	0	0	0	0	0	0	0	0	0
MH0056.scaffold62392_1	10085	9	9			0	0	0	1	0	0	0	0	0	0	0	0	0	0	0	0	0	0	0	0	0	0	0	0	0	0	0	0	0	0	0	0	0	0	0	0	0	0	0	0	0	0	0	0
MH0057.scaffold10072_3	23929	11	9			0	1	1	17	2.65302	0	0	0	0	0	0	0	0	0	0	0	0	0	0	0	0	0	0	0	0	0	0	0	0	0	0	0	0	0	0	0	0	0	0	0	0	0	0	0
MH0057.scaffold10334_1	43692	3	3			0	1	0	20	0	0	0	0	0	1.66877	0	0	0	0	0	0	0	0	0	0	0	0	0	0	0	0	0	0	0	0	0	0	1.35348	0	0	0	0	0	0	0	0	0	0	0
MH0057.scaffold18651_4	21007	10	9			0	0	0	1	0	0	0	0	0	0	0	0	0	0	0	0	0	0	0	0	0	0	0	0	0	0	0	0	0	0	0	0	0	0	0	0	0	0	0	0	0	0	0	0
MH0057.scaffold32231_4	22240	27	18			0	0	0	27	0	0	0	0	0	0.207105	0	0	0	19.5935	0	0	0	0	1.00005	0	0	0	0	0	0	0	0	0	0	0.982551	0	0	1.57666	0	0	0	0	1.24749	0	0.533173	0	0	0	0
MH0057.scaffold44037_2	13921	1	1			0	1	0	4	0	0	0	0	0	0	0.906668	0	0	0	0	0	0	0	0	0	0	0	0	0	0	0	0	0	0	0	0	0	0	0	0	0	0	0	0	0	0	0	0	0
MH0057.scaffold6459_2	27389	7	7			0	1	0	12	0	0	0	0	0	0	0	0	2.63974	0	0	2.76854	0	0	0	0	0	0	0	0	0	0	2.65391	0	1.22409	0	0	0	0	0	0	0	0	0	0	0	0	0	0	0
MH0058.scaffold109525_1	21159	1	1			0	0	0	5	0	9.29396	0	0	0	0	2.27177	0	0	0	0	0	0	0	0	0	0	0	0	0	0	0	0	0	0	0	0	0	0	0	0	0	0	0	0	0	1.26623	0	0	0
MH0058.scaffold19676_1	12450	18	15			1	0	0	11	0	0	16.4877	0	0	0.70956	0	0	0	0	0	0	0	0	0	0	0	0	4.19698	0	0	0	0	0	0	0	0	2.95875	0	0	0	0	0	0	0	0	0	0	0	0
MH0058.scaffold20440_2	21952	19	12			1	0	0	8	0	0	11.5565	0	0	0	0	0	0	0	0	0	0	0	0	0	0	0	3.24192	0	0	0	0	0	0	0	0	2.66785	0	0	0	0	0	0	0	0	0	0	0	0
MH0058.scaffold52819_8	14407	2	2		Parabacteroides_merdae_ATCC_43184	0	0	0	1	0	0	0	0	0	0	0	0	0	0	0	0	0	0	0	0	0	0	0	0	0	0	0	0	0	0	0	0	0	0	0	0	0	0	0	0	0	0	0	0
MH0058.scaffold9227_14	31828	1	1			0	0	0	12	0	0	0	0	0	0.381498	0	0	0	0	0	0	0	2.11555	2.72297	0	0	0	0	0	0	0	0	0	0	0	0	0	0	0	2.49522	0	0	0	0.904667	0	0	0	0	0
MH0059.scaffold26881_8	12660	3	2			1	1	0	43	0	6.54899	0	4.59118	1.37523	5.09108	0	0	0.917288	1.82023	0	2.04973	2.79903	0.653624	0	0	0	0	0	0	0	4.51545	0	0	0	0	0	0	7.41012	2.95325	0	1.66996	0	0.865576	0	0	0	0.854782	6.69045	0
MH0059.scaffold3152_1	18820	56	31		Clostridium_scindens_ATCC_35704	0	0	0	35	2.06172	1.04621	0	0	0	0	0	2.97229	0.940753	0	3.4132	0.719964	0	0.603986	0	0	0	0	0	0	0	0	0	0	0.720384	1.45247	0	0	0.868852	0	2.77334	0.765472	0	2.86596	0	0	0	0	0	0
MH0059.scaffold34095_2	14274	2	2			0	1	0	21	0	0	0	0	0	0	0	0	0	0	0	0.282679	0	0	0	0	0	0	0	0	1.04019	0	0	1.2496	0	0.578124	0	0	0	0.613713	0.567599	0	0	0	0	0	0	0	0	0
MH0059.scaffold34095_3	14166	1	1			0	0	0	22	0	0	0	0	0	0	0	0	0	0	0	0.292282	0	0	0	0	0	0	0	0	0.816242	0	0	1.3631	0	0.699807	0	0	0	0.552935	0.485176	0	0	0	0	0	0	0	0.34701	0
MH0059.scaffold3759_4	13363	1	1			0	0	0	4	0	0	0	0	0	0	0	0	0	0	0	0	0	0	0	0	0	0	0	0	0	0	6.20444	0	0	0	0	0	0	0	0	0	0	0	0	0	0	0	0	0
MH0059.scaffold3964_14	28083	1	1			0	0	0	3	0	0	0	0	0	0.188857	0	0	0	0	0	0	0	0	0	0	3.54379	0	0	0	0	0	0	0	0	0	0	0	0	0	0	0	0	0	0	0	0	0	0	0
MH0059.scaffold5343_4	13423	3	1			0	1	0	14	0	0	0	0	0	15.5826	0	0	12.5423	0	0	0	0	0	0	0	0	0	0	0	0	0	0	0	0	0	0	0	0	11.7318	0	0	10.9154	0	0	0	0	0	0	0
MH0059.scaffold68519_1	19592	17	12			0	0	0	2	0	0	0	0	0	0	0	0	0	0	0	0	0	0	0	0	0	0	0	0	0	0	0	0	0	0	0	0	0	0	0	0	0	0	0	0	0	0	0	0
MH0059.scaffold73615_1	23793	1	1			0	0	0	4	0	0	0	0	0	0	0	0	0	0	0	0	0	0	0	0	0	0	0	0	0	0	0	0.900159	0	0	0	0	0	0	0	0	0	0	0	0	0	0	0	0
MH0059.scaffold779_6	11508	1	1			0	0	0	3	0	0	0	0	0	0	0	0	0	0	0	0.190184	0	0	0	0	0	0	0	0	0	0	0	0	0	0	0	0	0	0	0	0	0	0	0	0	0	0	0	0
MH0059.scaffold790_1	12598	11	8			0	0	0	1	0	0	0	0	0	0	0	0	0	0	0	0	0	0	0	0	0	0	0	0	0	0	0	0	0	0	0	0	0	0	0	0	0	0	0	0	0	0	0	0
MH0059.scaffold89338_1	42865	53	15			1	0	0	7	0	0	5.6274	0	0	0	0	0	0	0	0	0	0	0	0	0	0	0	9.92619	0	0	0	0	0	0	0	0	0	0	0	0	0	0	0	0	0	0	0	0	0
MH0059.scaffold92075_2	22878	16	11			0	0	0	5	0	0	0	0	0	0	14.3444	0	0	0	0	0	0	0	0	0	0	0	0	0	0	0	0	0	0	0	0	0	0	0	0	0	0	0	0	0	0	0	0	0
MH0059.scaffold93560_1	13234	14	7			0	0	0	7	0	0	0	0	0	0	0	0	11.6659	0	0	0	0	0	0	0	0	0	0	0	0	0	0	0	0	0	0	0	0	0	0	12.7695	0	0	0.743275	0	0	0	0	0
MH0059.scaffold98_1	16653	12	10			0	0	0	3	0	0	0	0	0	0	12.4241	0	0	0	0	0	0	0	0	0	0	0	0	0	0	0	0	0	0	0	0	0	0	0	0	0	0	0	0	0	0	0	0	0
MH0060.scaffold109138_1	11414	7	7			0	0	0	4	0	0	0	0	0	0	0	0	0.8832	0	0	0	0	0	0	0	0	0	0	0	0	0	0	0	0	0	0	0	0	0	0	0	0	0	0	0	0	0	0	0
MH0060.scaffold109427_3	23566	1	1			1	0	0	7	0	0	0	0	0	0	0	0	0	0	0	0	0	0	0	0	0	0	0	0	119	0	0	0	0	0	0	0	0	0	0	0	0	0	0	0	0	0	0	0
MH0060.scaffold109688_1	11615	10	4		Bacteroides_caccae_ATCC_43185	0	0	0	3	0	0	0	0	0	0	0	0	0	0	0	0	0	0	0	0	0	0	0	0	0	0	0	0	0	0	0	0	0	0	0	0	0	0	0	0	0	0	0	0
MH0060.scaffold39947_3	20350	3	3			0	0	0	2	0	0	0	0	0	0	0	0	0	0	0	0	0	0	0	0	0	0	0	0	0	0	0	0	0	0	0	0	0	0	0	0	0	0	0	0	0	0	0	0
MH0060.scaffold42692_1	21743	2	2			0	0	0	1	0	0	0	0	0	0	0	0	0	0	0	0	0	0	0	0	0	0	0	0	0	0	0	0	0	0	0	0	0	0	0	0	0	0	0	0	0	0	0	0
MH0060.scaffold42692_2	12626	8	8			0	0	0	1	0	0	0	0	0	0	0	0	0	0	0	0	0	0	0	0	0	0	0	0	0	0	0	0	0	0	0	0	0	0	0	0	0	0	0	0	0	0	0	0
MH0060.scaffold53973_1	19149	2	2			0	0	0	12	0	0	0	0	0	0	0	0	0	0	0	0	0	7.41719	0	0	0	0	0	0	0	0	0	0	0	0	0	0	0	0	0	0	0	0	0	0	0	0	0	0
MH0060.scaffold71598_3	24207	6	6			0	0	0	3	0	0	0	0	0	0	0	0	0	0	0	0	0	0	0	0	0	0	0	0	0	0	0	0	0	0	0	0	0	0	0	0	0	0	0	0	0	0	0	0
MH0060.scaffold84056_1	11272	2	2			0	0	0	1	0	0	0	0	0	0	0	0	0	0	0	0	0	0	0	0	0	0	0	0	0	0	0	0	0	0	0	0	0	0	0	0	0	0	0	0	0	0	0	0
MH0061.scaffold1213_19	15743	1	1			1	0	0	43	0	30.1916	0	5.90415	0	0	0	0	0	0	1.08679	0	0	0	0	0	0.678753	0	0	0	0	0	0	14.6449	0	0	0	0	0	0	0.4452	2.52857	0	0.973119	0	0.636882	3.39108	8.70196	0.718429	5.15847
MH0061.scaffold1213_21	11161	6	3			0	0	0	36	0	24.6495	0	5.52669	0	0	0	0	0	0	1.88795	0	0	0	0	0	0	0	0	0	0	0	0	9.82428	0	0	0	0	0	0	0	2.75023	0	1.23751	0	0	2.45541	6.93109	0	4.8906
MH0061.scaffold14780_1	38255	61	29			0	0	1	16	0	0	0	0	0	1.63436	0	0	0	0	0	0	0	0	0	0	0	10.0328	0	0	0	0	0	0	0	0	3.43115	0	0	0	2.85016	0	0	0	0	0	1.54357	2.86061	0	0
MH0061.scaffold15589_6	17592	8	8			0	0	0	5	0	0	0	0	0	0	0	0	0	0	0	1.72268	3.08759	0	0	0	0	0	0	0	0	0	0	0	0	0	0	0	0	0	0	0	0	0	0	0	0	0	0	0
MH0061.scaffold39521_1	10300	2	2			0	0	0	3	0	0	0	0	0	0	0	0	0	0	0	0	0	0	0	0	0	0	0	0	0	0	0	0	0	0	0	0	0	0	0	0.698319	0	0	0	0	0	0	0	0
MH0061.scaffold39521_3	17101	1	1			0	0	0	2	0	0	0	0	0	0	0	0	0	0	0	0	0	0	0	0	0	0	0	0	0	0	0	0	0	0	0	0	0	0	0	0.608087	0	0	0	0	0	0	0	0
MH0061.scaffold43240_2	12437	2	2			0	0	0	6	0	0	0	0	0	0	0	0	0	0	0	0	0	0	0	0	0	0	0	0	0	0	0	0	0	0	0	0	0	0	0	0	0	0	0	0	0	0	0	0
MH0061.scaffold5995_1	13470	19	11		Dialister_invisus_DSM_15470	0	1	0	3	0	0	0	0	0	0	0	0	0	0	0	0	0	0	0	0	0	0	0	0	0	0	0	0	0	0	0	0	0	0	0	0	0	0	0	0	0	0	0	0
MH0061.scaffold9020_1	15331	2	2			0	0	0	5	0	0	0	0	0	0	0	0	0	0	0	0	0	5.4841	0	0	0	0	0	0	0	0	0	0	0	0	0	0	0	0	0	0	0	0	0	0	0	10.561	0	2.25477
MH0062.scaffold21026_1	18721	3	3			0	0	0	23	0	0	3.54055	0	0	0	2.69747	0	0	0	0	0	0	0	0	0	7.0928	5.93643	0	0	0	0	0	0	0	0	4.99317	0	0	0.59928	0	0	0	0	0	0	0	7.19105	0	11.2694
MH0062.scaffold21890_2	21589	10	9			0	0	0	9	0	0	0	0	0	0	0	0	0	0	0	0.416944	0	0	0	0	0	0	0	0	0	0	0	0	0	0	0	0	0	0	0	0	0	0	0	0	0	0	5.25953	0
MH0062.scaffold39214_1	22561	4	3			0	0	0	4	0	0	0	0	0	0	1.18941	0	0	0	0	0.74653	0	0	0	0	0	0	0	0	0	0	0	0	0	0	0	0	0	0	0	0	0	0	0	0	0	0	0	0
MH0062.scaffold48720_2	54846	47	32			0	0	0	1	0	0	0	0	0	0	0	0	0	0	0	0	0	0	0	0	0	0	0	0	0	0	0	0	0	0	0	0	0	0	0	0	0	0	0	0	0	0	0	0
MH0062.scaffold69182_4	14880	1	1		Clostridium_sp._SS2/1	0	0	0	16	0	0	0	0	0	0.53395	0	0	0	0	0.681065	0	0	0	0	0.607968	0	0	0	2.04817	0	0	0	0	2.05477	0	0	0	0	0	0	0	0	0	0	0	0	0	0	0
MH0062.scaffold76474_1	19711	2	2		Bacteroides_sp._3_1_33FAA	0	0	0	10	0	0	0	0	0	0	0	0	0	0	0	0	0	0	0	0	5.60222	0	0	0	0	0	0	0	0	0	5.36925	0	0	0	1.92799	0	0	0	0	0	0	0	0	0
MH0062.scaffold87339_1	20027	20	12	Bacteroides_sp._4_3_47FAA_32443	Bacteroides_vulgatus_PC510	0	0	0	22	0	0	0	0	0	0	0	0	0	0	0	0	0	0	0	0	0	12.9599	0	0	0	0	0	0	0	0	4.88267	0	0	0	0	5.39692	0	0	0	0	0	10.4501	0	0
MH0062.scaffold8803_5	32440	2	2		Bacteroides_cellulosilyticus_DSM_14838	0	0	0	1	0	0	0	0	0	0	0	0	0	0	0	0	0	0	0	0	0	0	0	0	0	0	0	0	0	0	0	0	0	0	0	0	0	0	0	0	0	0	0	0
MH0062.scaffold90147_1	12186	3	3			0	1	0	20	0	0	0.873059	0	0	0	0	0	0.508273	0	0	0	0	0	0	0	1.52884	0	0	1.3925	0	0	0	0	0	0	1.52935	0	0	1.02838	0	0	0	0	0	0.799947	0	0	0	0
MH0062.scaffold92671_1	34315	6	5			0	0	0	1	0	0	0	0	0	0	0	0	0	0	0	0	0	0	0	0	0	0	0	0	0	0	0	0	0	0	0	0	0	0	0	0	0	0	0	0	0	0	0	0
MH0062.scaffold93278_1	10879	1	1			1	1	0	2	0	0	0	0	0	0	0	0	0	0	0	0	0	0	0	0	0	0	0	0	0	0	0	0	0	0	0	0	0	0	0	0	0	0	0	0	0	0	0	0
MH0062.scaffold93325_1	18314	1	1			0	0	0	2	0	0	0	0	0	0	0	0	0	0	0	0	0	0	0	0	0	0	0	0	0	0	0	0	0	0	0	0	0	0	0	8.29612	0	0	0	0	0	0	0	0
MH0063.scaffold5042_4	37358	5	4			0	0	0	4	0	0	0	0	0	0	0	0	0	0	0	6.0464	0	0	0	0	0	0	0	0	0	0	0	0	0	0	0	0	0	0	0	9.5505	0	0	0	0	0	0	0	0
MH0063.scaffold55933_1	19210	2	2			0	0	0	1	0	0	0	0	0	0	0	0	0	0	0	0	0	0	0	0	0	0	0	0	0	0	0	0	0	0	0	0	0	0	0	0	0	0	0	0	0	0	0	0
MH0063.scaffold5651_2	93045	11	5			1	0	0	3	0	0	0	0	0	0	0	0	0	0	0	0	0	0	0	0	0	0	0	0	0	0	0	0	0	0	0	0	0	0	0	0	0	0	0	0	0	0	0	0
MH0064.scaffold10296_19	15064	5	5			0	0	0	1	0	0	0	0	0	0	0	0	0	0	0	0	0	0	0	0	0	0	0	0	0	0	0	0	0	0	0	0	0	0	0	0	0	0	0	0	0	0	0	0
MH0064.scaffold11509_6	55656	3	3		Alistipes_putredinis_DSM_17216	0	0	0	7	0	0	0	0	0	0	0	0	0	0	0	0	0	0	0	0	0	0	0	0	0	0	0	0	0	0	0	0	0	0	0	0	0	0	0	0	0	0	0	0
MH0064.scaffold11647_6	15033	3	3			0	1	0	3	0	0	0	0	0	0	0	0	0	0	0	0	0	0	0	0	0	0	0	0	0	0	0	0	0	0	0	0	0	0	0	0	0	0	0	0	0	0	0	0
MH0064.scaffold1204_1	19420	1	1			0	0	0	6	0	0	0	0	0	0	0	0	0	0	0	0	0	0	0	0	0	0	0	0	0	0	0	0	0	0	0	0	0.42644	0	0	0	0	0	0	0	0	0	0	0
MH0064.scaffold27532_2	60226	29	14			0	0	0	1	0	0	0	0	0	0	0	0	0	0	0	0	0	0	0	0	0	0	0	0	0	0	0	0	0	0	0	0	0	0	0	0	0	0	0	0	0	0	0	0
MH0064.scaffold27658_2	19112	2	2			0	0	0	1	0	0	0	0	0	0	0	0	0	0	0	0	0	0	0	0	0	0	0	0	0	0	0	0	0	0	0	0	0	0	0	0	0	0	0	0	0	0	0	0
MH0064.scaffold27658_4	14703	1	1			0	0	0	1	0	0	0	0	0	0	0	0	0	0	0	0	0	0	0	0	0	0	0	0	0	0	0	0	0	0	0	0	0	0	0	0	0	0	0	0	0	0	0	0
MH0064.scaffold27672_2	13941	1	1			1	0	0	12	0	0	0	0	0	0	0	0	0	0	0	0	0	0	0	0	0	0	0	0	0	0	0	0	0	0	0	0	0	0	0	0.63466	0	0.670066	0	0	0	0	0	9.99282
MH0064.scaffold7764_1	18690	14	9			0	0	0	1	0	0	0	0	0	0	0	0	0	0	0	0	0	0	0	0	0	0	0	0	0	0	0	0	0	0	0	0	0	0	0	0	0	0	0	0	0	0	0	0
MH0064.scaffold7764_3	17923	1	1			0	0	0	1	0	0	0	0	0	0	0	0	0	0	0	0	0	0	0	0	0	0	0	0	0	0	0	0	0	0	0	0	0	0	0	0	0	0	0	0	0	0	0	0
MH0064.scaffold78389_1	10267	6	5			0	0	0	2	0	0	0	0	0	0	0	0	0	0	0	0	0	0	0	0	0	0	4.6731	0	0	0	0	0	0	0	0	0	0	0	0	0	0	0	0	0	0	0	0	0
MH0064.scaffold8188_26	22217	10	10			0	0	0	1	0	0	0	0	0	0	0	0	0	0	0	0	0	0	0	0	0	0	0	0	0	0	0	0	0	0	0	0	0	0	0	0	0	0	0	0	0	0	0	0
MH0065.scaffold112151_1	14284	6	3			0	0	0	1	0	0	0	0	0	0	0	0	0	0	0	0	0	0	0	0	0	0	0	0	0	0	0	0	0	0	0	0	0	0	0	0	0	0	0	0	0	0	0	0
MH0065.scaffold1761_7	48339	7	6			0	0	0	7	0	0	0	0	0	0	0	13.2246	0	0	0	0	0	0	0	0	0	0	0	0	0	0	0	0	0	0	0	0	0	0	0	0	0	0	0	0.930487	0	0	0	0
MH0065.scaffold53251_2	13403	5	5			0	0	0	56	1.12228	6.51767	0	6.7576	6.51188	5.51999	3.58038	0	3.10055	1.41264	3.091	10.7706	0	2.95533	0	0	1.74118	0	0	1.19028	0	5.95299	0	0.912672	1.75947	0	0	0	15.6586	5.78267	1.40029	1.00695	0	2.32658	1.52966	0	1.75461	1.48306	0	0
MH0065.scaffold85454_3	18372	10	7		Eubacterium_ventriosum_ATCC_27560	0	0	0	19	0	0	0	0	0	2.09985	0	0	0.777137	0	0	0.544756	0	0	1.73598	0	0	0	0	0	0	1.14106	0	1.00499	0	0.676719	0	0	0	0	0	0	0.726465	0	0	0	1.35599	0	0	0
MH0065.scaffold88268_7	21048	6	5			0	0	0	1	0	0	0	0	0	0	0	0	0	0	0	0	0	0	0	0	0	0	0	0	0	0	0	0	0	0	0	0	0	0	0	0	0	0	0	0	0	0	0	0
MH0066.scaffold11464_17	39403	31	29			0	0	0	1	0	0	0	0	0	0	0	0	0	0	0	0	0	0	0	0	0	0	0	0	0	0	0	0	0	0	0	0	0	0	0	0	0	0	0	0	0	0	0	0
MH0066.scaffold11939_3	12332	4	3			0	0	0	2	0	0	0	0	0	0	0	0	0	0	0	0	0	0	0	0	0	0	0	0	0	0	0	0	0	0	0	0	0	0	0	0	0	0	0	0	0	0	0	0
MH0066.scaffold12717_4	13286	3	2			0	0	0	14	0	0	0	0	0	0	0	0	0	0	0	0	9.68435	0	0	0	0	0	0	0	0	6.81405	0	0	2.36836	0	0	0.522645	0	0	0	0	0	0	0	5.74922	0	0	0	0
MH0066.scaffold15047_1	11153	33	12			0	0	0	1	0	0	0	0	0	0	0	0	0	0	0	0	0	0	0	0	0	0	0	0	0	0	0	0	0	0	0	0	0	0	0	0	0	0	0	0	0	0	0	0
MH0066.scaffold16527_9	22788	1	1			0	0	0	58	1.22667	7.29263	0	6.91062	7.87309	5.67933	2.87179	0	2.69402	1.97917	3.39245	11.0687	0	2.55854	0	0	1.63017	0	0	1.0795	0	5.18521	0	1.05361	3.25249	0	0	1.00123	13.1514	5.05753	1.2869	1.21765	0	2.18274	1.49289	0	1.82084	1.48187	0	0
MH0066.scaffold17926_1	26544	4	4			1	1	0	43	0	6.04072	0	4.73254	1.15802	4.7447	0	0	2.51155	1.31252	0	1.93573	2.47701	0.624358	0	0	0	0	0	0	0	4.16806	0	0	0	0	0	0	6.02895	1.01109	0	1.59923	0	0.763452	0	0	0	1.60341	5.83438	0
MH0066.scaffold3338_6	23723	29	11			1	0	0	3	0	0	0	0	0	0	0	0	0	0	0	0	0	0	0	0	1.55876	0	0	0	0	0	0	0	0	0	0	0	0	0	0	0	0	0	0	0	0	0	0	0
MH0066.scaffold59021_9	12503	1	1			1	0	0	11	0	0	0	0	0	0	5.05115	0	0	0	0	0	0	0	0	0	0	0	1.2938	0	0	0	0	0	0	0	0	0	0	0	0	0	0	6.38065	0	0	0	0	0	0
MH0066.scaffold7359_7	14906	8	4			0	0	0	11	0	0	0	0	0	0	0	0	0	0	0	0	0	0	0	0	0	0	0	0	0	0	0	0	0	0	0	0	0	0	0	0	0	0	0	0	0	0	0	0
MH0067.scaffold103_9	26438	13	12			0	0	0	4	0	0	0	0	0	0	0	0	0	0	0	0	0	0	0	0	0	0	0	0	0	0	0	0	0.567067	0	0	0	0	0	0	0	0	0	0	0	0	0	0	0
MH0067.scaffold10776_2	22248	2	1			0	1	0	52	0	2.99084	2.98504	0	0	0.81466	0	1.13797	0	1.64011	0	0.469672	0	0.95001	5.81005	0.563706	12.9021	0	1.75416	0	0	0	0	0.98482	0	1.51088	3.75025	0	2.15442	0	0	1.12194	0.548196	0.696062	0.488986	0.960367	0	0.507703	0	6.33093
MH0067.scaffold10776_5	21782	2	2			0	1	0	50	0	2.8543	2.11095	0	0	0.669056	0	1.06892	0	1.84301	0	0.478751	0	0.668255	4.86978	0.491999	12.7097	0	1.58337	0	0	0	0	0.803842	0	1.67034	3.2972	0	2.1445	0	0	1.03812	0	0.438787	0.507165	0.721271	0	0.4878	0	6.21917
MH0067.scaffold17093_3	10299	6	5			0	1	1	39	0	0	0	0	0	0	4.27386	0	2.02381	42.9784	0	0	0	0	0	0	0	0	0	0	0	0	0	0	0	0	0	3.01701	0	0	0	0	0	0	0	11.9144	0	0	0	0
MH0067.scaffold17529_1	25983	44	25	Bacteroides_dorei_5_1_36/D4_32451		0	0	0	6	0	0	0	0	0	1.73177	0	0	0	0	0	0	0	0	0	0	0	0	0	0	0	0	0	0	0	0	0	0	0	0	0	0	0	0	0	0	1.09018	11.3229	0	0
MH0067.scaffold1767_8	50255	20	12			1	1	1	2	0	0	0	0	0	0	0	0	0	0	0	5.48939	0	0	0	0	0	0	0	0	0	0	0	0	0	0	0	0	0	0	0	0	0	0	0	0	0	0	0	0
MH0067.scaffold2563_5	26870	2	2		Parabacteroides_merdae_ATCC_43184	0	0	0	13	0	0	0	0	0	0	0	0	0	0	0	0	0	0	0	0	0	0	0	0	0	0	0	0	0	0	0	0	0	0	2.21226	6.86026	0	0	0	0	0	1.5503	1.61383	0
MH0067.scaffold274_4	13839	1	1			0	0	0	5	0	0	0	0	0	0	0	0	0	0	0	0	0	0	0	0	0	0	0	0	0	0	0	0	0	0	0	1.96491	0	0	0	0	0	0	0	0	0	0	0	0
MH0067.scaffold38202_6	12380	2	2			0	1	0	18	0	0	0	0	0	2.87705	0	0	0	0	0	0	0	0	0	0	0	0	0	0	0	0	0	0	0	0	0	0	0	0	0	0	0	0	0	0	0	0	0	0
MH0067.scaffold39892_5	31669	5	1			0	0	0	1	0	0	0	0	0	0	0	0	0	0	0	0	0	0	0	0	0	0	0	0	0	0	0	0	0	0	0	0	0	0	0	0	0	0	0	0	0	0	0	0
MH0067.scaffold4486_1	13789	2	2			0	0	0	2	0	0.59215	0	0	0	0	0	0	0	0	0	0	0	0	0	0	0	0	0	0	0	0	0	0	0	0	0	0	0	0	0	0	0	0	0	0	0	0	0	0
MH0067.scaffold45426_1	19000	9	8			0	0	0	1	0	0	0	0	0	0	0	0	0	0	0	0	0	0	0	0	0	0	0	0	0	0	0	0	0	0	0	0	0	0	0	0	0	0	0	0	0	0	0	0
MH0067.scaffold50515_1	11360	6	3			1	0	0	10	0	0	14.8564	0	0	6.24758	0	0	0	0	0	0	0	0	0	0	0	0	0	0	0	0	0	68.6893	0	0	0	0	0	0	0	0	0	0	0	0	0	0	0	0
MH0067.scaffold5913_1	14169	3	3		Roseburia_inulinivorans_DSM_16841	0	0	0	6	0	0	0	0	0	0	0	0	0	0	0	0	0	0	0	0	0	0	0	0	2.36056	0	0	0	0	0	0	0	0	0	0	0	0	0	0	0	0	0	0	0
MH0067.scaffold6132_6	21114	2	2			0	0	0	48	0	5.61032	1.23746	5.37043	4.04961	0.245216	0	0	0	0	0	0.186498	0	3.07488	7.97567	0	7.52941	0	0	0	5.72413	0	0	0	0	0	0	1.34582	0	0	0.962809	0.886656	1.53309	0	0	0.459117	0	0	0	11.7403
MH0067.scaffold6234_5	19399	5	3			0	0	0	9	0	0	0	0	0	0	0	0	0	0	0	0	0	0	0	0	0	0	0	0	0	0	0	0	0	0	1.34749	0	0	0	0	0	0	1.50253	1.02023	0	0	0	0	0
MH0067.scaffold7424_1	15050	12	6			0	0	0	1	0	0	0	0	0	0	0	0	0	0	0	0	0	0	0	0	0	0	0	0	0	0	0	0	0	0	0	0	0	0	0	0	0	0	0	0	0	0	0	0
MH0068.scaffold14290_1	21769	3	2			0	0	0	11	0	0	0	0	0	0	0	0	1.82903	0	0	0	0	1.22122	0	0	0	0	0	0	0	0	0	0	0	0	3.33219	0	0	0	0	0	0	0	0	0	0	0	0	0
MH0068.scaffold14290_2	36694	8	7			0	0	0	8	0	0	0	0	0	0	0	0	1.61188	0	0	0	0	1.05096	0	0	0	0	0	0	0	0	0	0	0	0	2.63722	0	0	0	0	0	0	0	0	0	0	0	0	0
MH0068.scaffold17211_1	49986	10	7		Bacteroides_stercoris_ATCC_43183	1	1	0	36	1.7233	0	35.8651	3.82279	3.64513	0	0	0	1.58957	0	0	0	0	0	0	4.14145	16.1521	0	0	4.81182	0	0	0	0	16.15	1.43729	0	20.3303	0	0	0	0	0	0	0	0	0	0	14.8684	6.83968
MH0068.scaffold25493_1	66054	1	1			0	0	0	26	5.16648	0	0	26.7386	0	0	1.61124	17.882	0	0	0	0	0	79.8993	0	0	0	7.56081	0	127.312	0	0	0	0	0	0	10.8674	0	0	1.70355	0	0	4.29004	0	0	0	0	0	0	14.9931
MH0068.scaffold29877_2	39693	2	2			1	0	0	15	0	0	0	0	0	0	3.66744	0	0	0	0	0.680357	0	0	0	0	0	0	0	0	0	0	0	13.1235	0	0	0	0	0	0	0	0	0	3.92503	0	0	0	0	0	12.6057
MH0068.scaffold5154_1	42209	2	2		Bacteroides_sp._1_1_6	0	0	0	32	0	0	0	1.28877	0	0	0	0	0	6.92315	0	0	0	0	0	2.922	0	0	0	4.70537	0	0	0	0	1.73727	0	2.16505	0	0	0	0	0	0.905688	1.43379	0	0	0	3.36678	1.60714	0
MH0068.scaffold550_14	10937	8	8			0	0	0	33	8.24369	0	0	2.75107	0	0	2.65722	3.27193	0.340701	0	0	0	0	0	0	1.21447	9.49704	0	0	0	0	0	0	13.8554	0	0	0	1.788	0	0	0	0.65015	1.0833	0	2.08722	3.30338	0	0	0	0
MH0068.scaffold6082_6	29743	2	1			0	0	0	24	0	0	0	0	0	0	1.92189	0	0	0	0	0	0	0	0	0.781655	0	0	0	0	0	0	0	0	0	0	0	0	0.411823	0	0	0	0	0.369237	0.739339	0	0	0	0	5.02593
MH0069.scaffold16323_9	11438	2	2			0	0	0	1	0	0	0	0	0	0	0	0	0	0	0	0	0	0	0	0	0	0	0	0	0	0	0	0	0	0	0	0	0	0	0	0	0	0	0	0	0	0	0	0
MH0069.scaffold20126_2	12696	1	1			0	0	0	1	0	0	0	0	0	0	0	0	0	0	0	0	0	0	0	0	0	0	0	0	0	0	0	0	0	0	0	0	0	0	0	0	0	0	0	0	0	0	0	0
MH0069.scaffold41849_2	17837	1	1			0	0	0	7	0	0	0	0	0	0	0	0	0	0	0	0	0	0	0	0	0	0	0	2.54266	0	0	1.26532	0	0	0	0	0	0	0	0	0	0	0	0	0	0	0	0	0
MH0069.scaffold49879_1	13502	2	2			0	0	0	35	0	3.15291	0	0	1.32282	0.539599	0	0	1.09854	0	2.04867	0.158586	1.79725	0.933318	0	3.17201	0	0	3.29424	0	0	4.67573	0	0	0.952651	0	1.91381	1.45725	0	0	0	0	0.567281	0	0	0.601691	0	0	0	0
MH0069.scaffold53039_2	10969	1	1			0	0	0	1	0	0	0	0	0	0	0	0	0	0	0	0	0	0	0	0	0	0	0	0	0	0	0	0	0	0	0	0	0	0	0	0	0	0	0	0	0	0	0	0
MH0069.scaffold54593_3	27531	14	10			0	0	0	9	0	0	0	0	0	0	0	0	0	0	0	0	0	0	0	0	0	0	0	0	0	0	0	0	0	0	0	0	0	0	0	0	0	0	0	0	0	0	0	0
MH0069.scaffold6760_3	11421	1	1			0	0	0	17	0	0	0	0	0	0	2.88394	0	0	0	0.810744	0	0	0	0	0	0	0	0	0	0	0	0	0	0	0	0	0	7.45301	0	0	0.81375	1.11155	0	0	0	0	0	0	0
MH0069.scaffold813_1	16825	1	1			0	0	0	4	0	0	0	0	0	0	0	0	0	0	0	0	0	0	2.07936	0	0	0	0	0	0	0	0	0	0	0	0	0	0	0	0	0	0	0	0	2.35366	0	0	0	0
MH0069.scaffold813_2	43085	2	2			0	0	0	2	0	0	0	0	0	0	0	0	0	0	0	0	0	0	1.59891	0	0	0	0	0	0	0	0	0	0	0	0	0	0	0	0	0	0	0	0	0	0	0	0	0
MH0069.scaffold85195_1	18262	3	3			0	0	0	1	0	0	0	0	0	0	0	0	0	0	0	0	0	0	0	0	0	0	0	0	0	0	0	0	0	0	0	0	0	0	0	0	0	0	0	0	0	0	0	0
MH0069.scaffold9799_4	32272	4	4			0	0	0	1	0	0	0	0	0	0	0	0	0	0	0	0	0	0	0	0	0	0	0	0	0	0	0	0	0	0	0	0	0	0	0	0	0	0	0	0	0	0	0	0
MH0070.scaffold102831_1	39310	10	5			1	0	0	41	0	23.1614	0	6.43883	0	0	0	0	0	0	0.920441	0	0	0	0	0	0	0	0	0	0	0	0	13.6026	0	0	0	0	0	0	0.521999	2.90138	0	1.15795	0	1.01251	3.23409	8.50922	0	5.05435
MH0070.scaffold106111_2	16703	42	32			0	0	0	8	0	0	0	0	0	0	0	0	0	0	0	0	0	0	0	0	0	0	2.58957	0	0	0	0	0	0	0	0	0	0	0	0	0	0	0	0	0	0	0	0	0
MH0070.scaffold113544_1	12241	1	1			0	1	0	5	0	0	0.88381	0	0	0	0	0	0	0	0	0	0	0	0	0	0	0	0	0	0	0	0	0	0	0	0	0	0	0	0	0	0	0	10.9377	0	0	0	0	0
MH0070.scaffold15739_2	11631	50	26			0	0	0	3	0	0	0	0	0	0	0	0	0	0	0	0	0	0	4.20769	0	0	0	0	0	0	0	0	0	0	0	0	0	0	0	0	0	0	0	0	0	0	0	0	0
MH0070.scaffold25_2	10553	14	9			0	0	0	13	0	0	1.37652	0	0	0	0	0	0	0	0	0	1.20587	0	8.64914	0	0	0	0	0	0	0	1.20584	0	0	0	0	1.84507	0	0	0	0	0	0	0	0	0	0	0	8.29944
MH0070.scaffold26078_1	35738	6	5	Clostridium_sp._L2-50_18211		0	0	0	56	0	1.12825	0	0	0	3.35988	6.85946	3.4004	7.25999	2.29662	1.72058	0.925452	0	1.36833	15.904	0.788422	2.72185	0	1.59863	1.35764	0	0	0	0.527476	0.801674	6.56968	0	0	1.20954	0.617888	0	0	0	0	2.00878	0	0	0	0	1.85103
MH0070.scaffold41858_1	31438	69	29	Bacteroides_dorei_5_1_36/D4_32451		0	0	0	2	0	0	0	0	0	0	0	0	0	0	0	0	0	0	0	0	0	0	0	0	0	0	0	0	0	0	0	0	0	0	0	0	0	0	0	0	0	0	0	0
MH0070.scaffold43828_1	14075	1	1			0	0	0	23	0	0	0	0	3.03247	0	10.681	0	0	0	0	0	1.75009	0.502093	0	0	0	0	0	0	0	0	0	0	0.915148	0	0	0	3.49927	0	0	6.4319	0	0	0	0	0	0	0	0
MH0070.scaffold57184_3	25344	18	3			0	0	0	1	0	0	0	0	0	0	0	0	0	0	0	0	0	0	0	0	0	0	0	0	0	0	0	0	0	0	0	0	0	0	0	0	0	0	0	0	0	0	0	0
MH0070.scaffold71140_1	15336	3	2			0	0	0	13	0	0	0	0	0	0	0	0	0	0	0	0	0	0	0	0.741016	0	0	0	0	0	0	0	0	0	0	0	0	0.726974	0	0	0	0.989896	0	0.601244	0	0	0	0	3.66698
MH0070.scaffold71140_3	28401	4	2			0	0	0	10	0	0	0	0	0	0	0	0	0	0	0	0	0	0	0	0.763231	0	0	0	0	0	0	0	0	0	0.738389	0	0	0.951567	0	0	0	1.30547	0	0	0	1.00433	0	0	0
MH0071.scaffold11541_1	33924	3	3		Bacteroides_sp._D20	0	0	0	25	0	0	6.43721	0	0	0.574741	0	0	0	22.2213	6.57663	0	0	0	0	0	3.02187	0	0	0	0	0	2.66242	0	0	0	3.57965	0	0	0	0	0	0	0	0	0	0	5.18829	0	0
MH0071.scaffold16344_4	83939	1	1			1	0	0	8	0	0	0	0	0	0	0	0	0	0	0	7.66209	0	0	0	0	0	0	0	2.0814	1.38072	0	0	0	0	0	16.6278	0	0	0	0	0	0	0	0	0	0	0	0	0
MH0071.scaffold19851_6	12463	30	7			1	0	0	2	0	0	3.84325	0	0	0	0	0	0	0	0	0	0	0	0	0	0	0	0	0	0	0	0	0	0	0	0	0	0	0	0	0	0	0	0	0	0	0	0	0
MH0071.scaffold19890_2	17813	1	1			0	0	0	7	0	0	0	0	0	0	0	0	0	0	0	0	0	0	0	0	0	0	0	0	0	0	0	0	0	0	0	0	0	0	0	0	0	0.453035	6.39297	0	0	1.92105	0	0
MH0071.scaffold22053_5	10107	2	1			0	0	0	18	0	0	0	0	0	0	1.87779	0	0	0	0	0	0	0	0	0	0	0	0	0	0	0	0	0	0	0	0	0	0.710423	0	0	0	0	0	0	0	0	0	0	2.78526
MH0071.scaffold389_1	24389	1	1			0	0	0	12	0	0	0	0	0	0	0	0	0	0	1.82191	0	0	0	0	6.89559	0	0	0	0	0	0	0	0	0	0	0	0	0	10.072	0	1.35508	0	0	0	0	0	0	3.96026	0
MH0071.scaffold4110_5	28330	20	12		Bacteroides_sp._4_3_47FAA	0	0	0	12	0	0	2.05049	0	0	0	0	0	0	0	0	0	1.22075	0	9.65578	0	0	0	0	0	0	0	0	0	0	0	0	2.07828	0	0	0	0	0	0	0	0	0	0	0	7.66076
MH0071.scaffold943_7	16461	3	2			0	0	0	1	0	0	0	0	0	0	0	0	0	0	0	0	0	0	0	0	0	0	0	0	0	0	0	0	0	0	0	0	0	0	0	0	0	0	0	0	0	0	0	0
MH0072.scaffold10011_2	42106	117	30	Dialister_invisus_DSM_15470_33143	Dialister_invisus_DSM_15470	0	0	0	1	0	0	0	0	0	0	0	0	0	0	0	0	0	0	0	0	0	0	0	0	0	0	0	0	0	0	0	0	0	0	0	0	0	0	0	0	0	0	0	0
MH0072.scaffold10110_2	41677	2	2			0	0	0	1	0	0	0	0	0	0	0	0	0	0	0	0	0	0	0	0	0	0	0	0	0	0	0	0	0	0	0	0	0	0	0	0	0	0	0	0	0	0	0	0
MH0072.scaffold10110_3	29788	2	2			0	0	0	7	0	0	0	0	0	0	0	0	0	0	0	0	0	0	0	0	0	0	0	0	0	0	0	0	0	12.2658	0	0	0	1.08673	0	0	0	0	0	0	0	0	0	0
MH0072.scaffold1390_5	17310	18	17		Faecalibacterium_prausnitzii_A2-165	0	1	0	75	1.18627	3.93047	0	2.19462	0	2.1201	1.07583	0	2.0566	0	0.867763	1.57825	0	1.12212	0	1.16149	2.86018	0	2.50152	0.489516	0	4.62601	6.52452	2.66459	0.540219	3.00709	0	0.694345	1.4791	0.514488	0	0.724841	0	1.26639	0.475002	9.9964	2.73619	3.20209	0	1.31537
MH0072.scaffold22653_5	12551	9	6			0	0	0	5	0	0	0	0	0	0	0	0	0	0	0	0	0	0	0	0	0	0	0	0	0	0	0	0	0	0	0	0	0	0	0	0	0	0	0	0	0	0	0	0
MH0072.scaffold24971_15	17261	23	21	Ruminococcus_sp._5_1_39BFAA_32503		0	0	0	9	0	0	0	0	0	0	0	0	0	0	0	0	0	0	0	0	0	0	0	0	0	0	0	0	0	0	0	0	0	0	0	0	2.85791	0	0	0	0	0	0	0
MH0072.scaffold31584_7	26542	4	2			0	1	0	9	0	0	0	0	0	0	0	0	0	0	0	0	0	1.05242	0	0	0	0	0	0	0	0	0	0	0	0	0	0	0	0	0	0	0	232.367	0	41.9385	0	0	0	0
MH0072.scaffold45909_1	17983	3	3			0	0	0	2	0	0	0	0	0	0	0	0	0	0	0	0	0	0	0	0.596748	0	0	0	0	0	0	0	0	0	0	0	0	0	0	0	0	0	0	0	0	0	0	0	0
MH0072.scaffold4659_4	15398	3	3			0	1	0	5	0	0	0	0	0	0	0	0	0	0	0	0	0	0	0	0	0	0	0	0	0	0	0	0	0	0	0	0	0	0	0	0	0	0	0	0	0	0	0	0
MH0072.scaffold4659_5	10313	1	1			0	0	0	5	0	0	0	0	0	0	0	0	0	0	0	0	0	0	0	0	0	0	0	0	0	0	0	0	0	0	2.68397	0	0	0	0	0	0	0	0	0	0	0	0	0
MH0072.scaffold532_1	10390	8	6			0	1	0	14	2.55673	0	0	2.03034	1.7264	0	0	0	0	0	0	0	0	0	0	0	10.8476	0	1.97332	0	0	0	0	0	0	0	0	0	2.98616	0	0	0	0	0	0	0	0	0	0	0
MH0072.scaffold7078_1	23847	3	3			0	1	0	32	0	0.671873	0	1.89118	0	0	2.33153	0	3.66022	1.60829	2.14543	4.25259	0	0	0	0	0	0	0	0	0	2.27506	3.93993	0	1.87713	0	0	0	1.26312	0	0.857967	1.03377	0	0	0	1.54558	0	2.47839	0	0
MH0073.scaffold2970_10	27443	23	16			0	0	0	6	0	0	0	0	0	0	0	0	0	0	0	0	0	0	0	0	0	0	0	0	0	0	0	0	0	0	0	0	0	0	0	2.81855	0	1.84717	0	0	0	2.16762	0	0
MH0073.scaffold33276_3	10787	1	1			0	0	0	1	0	0	0	0	0	0	0	0	0	0	0	0	0	0	0	0	0	0	0	0	0	0	0	0	0	0	0	0	0	0	0	0	0	0	0	0	0	0	0	0
MH0073.scaffold35719_2	18265	1	1			0	0	0	1	0	0	0	0	0	0	0	0	0	0	0	0	0	0	0	0	0	0	0	0	0	0	0	0	0	0	0	0	0	0	0	0	0	0	0	0	0	0	0	0
MH0073.scaffold43788_2	16855	1	1			0	0	0	1	0	0	0	0	0	0	0	0	0	0	0	0	0	0	0	0	0	0	0	0	0	0	0	0	0	0	0	0	0	0	0	0	0	0	0	0	0	0	0	0
MH0073.scaffold52383_1	16660	1	1			0	0	0	12	0	0	0	0	0	0	0	2.71853	0	0	0	0.434903	0	0	0	0	0	0	0	0	0	0	0	0	0	0	0	0	0	0	0	0	0	0	0	0	0	0	0	2.05206
MH0073.scaffold5966_4	10659	1	1			0	0	0	6	0	0	0	0	0	0	0	0	0	0	0	0	0	0	0	0	0	0	0	0	0	0	0	0.863251	0	0	0	0	0	0	0	0	0	0	0	0	0	0	0	0
MH0073.scaffold77928_1	21478	2	1			0	0	0	2	0	0	0	0	0	0	0	0	0	0	0	0	0	0	0	0	0	0	0	0	0	0	0	0	0	0	0	0	0	0	0	0	0	0	0	0	0	0	0	0
MH0074.scaffold1136_4	81419	111	25		Dialister_invisus_DSM_15470	0	0	0	2	0	0	0	0	0	0	0	0	0	0	0	0	0	0	0	0	0	0	0	0	0	0	0	0	0	0	0	0	0	0	0	0	0	0	0	0	0	0	0	0
MH0074.scaffold43559_3	24769	24	20			0	0	0	8	0	0	0	0	0	0	0	0	0	0	0	0	0	0	0	0	0	0	0	0	0	0	0	0	0	0	0	0	0	0	2.11216	0	0	0	0	0	0	0	0	1.78879
MH0074.scaffold6139_1	18187	1	1			0	0	0	24	0	2.3966	0	0	0	1.344	0	0	0	0	1.70702	0	0	0	0	0	0	0	8.84306	0	8.28274	0	0	0	2.87602	0	0	0	0	0	0	0	0	0	0	0	0	0	0	0
MH0074.scaffold9085_2	11591	2	2			0	0	0	2	0	0	0	0	0	0	0	0	0	0	0	0	0	0	0	0	0	0	0	0	0	0	0	0	0	0	0	0	0	0	0	0	0	0	0	0	0	0	0	0
MH0074.scaffold91_8	36501	4	4		Parabacteroides_sp._D13	0	0	0	5	0	0	0	1.16174	0	0	0	0	0	0	0	0.619177	0	0	0	0	0	0	0	0	0	0	0	0	0	0	0	0	0	0	0	0	0	0	0	0	0	0	0	0
MH0075.scaffold1473_1	50928	10	7			0	0	0	1	0	0	0	0	0	0	0	0	0	0	0	0	0	0	0	0	0	0	0	0	0	0	0	0	0	0	0	0	0	0	0	0	0	0	0	0	0	0	0	0
MH0075.scaffold27183_3	28516	4	4		Alistipes_putredinis_DSM_17216	1	1	0	23	0	9.76542	0	0	0	0	0	0	0	0	0	0	5.20498	0	0	6.98121	0	0	0	0	0	0	0	0	0	0	3.91355	4.39827	0	0	8.27917	0	0	0	0	0	0	0	8.46709	0
MH0075.scaffold32820_1	14220	13	11			1	0	0	3	0	0	5.89126	0	0	0	0	0	0	0	0	0	0	0	0	0	0	0	0	0	0	0	0	0	0	0	0	0	0	0	0	0	0	0	0	0	0	0	0	0
MH0075.scaffold3453_3	51662	10	4			0	0	0	1	0	0	0	0	0	0	0	0	0	0	0	0	0	0	0	0	0	0	0	0	0	0	0	0	0	0	0	0	0	0	0	0	0	0	0	0	0	0	0	0
MH0075.scaffold4078_1	14134	3	1		Bacteroides_sp._9_1_42FAA	0	1	0	24	0	0	0	0	0	0	0	0	0	14.5255	14.2151	0	0	0	8.57464	0	0	0	0	0	0	0	0	0	0	0	0	2.74649	0	0	0	0	0	0	0	0	0	0	0	0
MH0075.scaffold53673_3	16434	1	1			0	0	0	6	0	0	0	0	0	0	0	0	0	0	0	0	0	0	0	0	0	0	0	0	0	0	0	0	0	0	0	0	0	0.52937	1.78848	0	0	0	0	0	0	0	0	0
MH0075.scaffold61189_1	14483	10	7			0	0	0	2	0	0	0	0	0	0	0	0	0	0	0	0	0	0	0	0	0	0	0	0	0	0	0	0	0	0	0	0	0	0	0	0	0	0	0	0	0	0	0	0
MH0075.scaffold61433_1	24168	3	3			0	0	1	34	0	0	0	0	0	0	1.74546	1.04301	0	0	0	0	0	0	0	0	0	1.40835	0	0	0	0	0	0	0	0	1.34604	0	0	0	0	0	2.41338	2.66276	1.59676	1.83394	0	0	2.29431	0
MH0075.scaffold651_17	19706	1	1			0	0	0	4	0	0	0	0	0	0	0	0	0	0	0	0	2.02474	0	0	0	0	0	0	0	0	0	0	0	0	0	0	0	0	0	0	0	0	0	0	0	0	0	0	0
MH0075.scaffold91179_3	15917	1	1			1	0	0	5	0	0	0	0	0	0	0	0	0	0	0	3.85382	0	0	0	0	0	0	0	0	0	0	0	0	0	0	7.05259	0	0	0	0	0	0	0	0	0	0	0	0	0
MH0075.scaffold95202_1	16401	1	1			0	0	0	1	0	0	0	0	0	0	0	0	0	0	0	0	0	0	0	0	0	0	0	0	0	0	0	0	0	0	0	0	0	0	0	0	0	0	0	0	0	0	0	0
MH0075.scaffold95771_1	16143	2	2			0	0	0	1	0	0	0	0	0	0	0	0	0	0	0	0	0	0	0	0	0	0	0	0	0	0	0	0	0	0	0	0	0	0	0	0	0	0	0	0	0	0	0	0
MH0075.scaffold9707_1	44114	13	6			0	0	0	1	0	0	0	0	0	0	0	0	0	0	0	0	0	0	0	0	0	0	0	0	0	0	0	0	0	0	0	0	0	0	0	0	0	0	0	0	0	0	0	0
MH0076.scaffold72259_1	12889	7	7			0	0	0	1	0	0	0	0	0	0	0	0	0	0	0	0	0	0	0	0	0	0	0	0	0	0	0	0	0	0	0	0	0	0	0	0	0	0	0	0	0	0	0	0
MH0077.scaffold11143_2	18873	27	15			0	0	0	4	0	0	0	0	0	0.670805	0	0	0	0	0	0	0	0	0	0	0	0	0	0	0	0	0	0	0	0	0	0	0	0	0	0	0	0	0	0	0	0	0	0
MH0077.scaffold2351_1	21795	2	2		Bacteroides_finegoldii_DSM_17565	0	1	1	77	0	0	21.7926	0	0	0	4.59785	3.8552	1.80703	21.0013	6.86371	1.92289	10.2612	0	0	0	19.0216	4.12393	0	0	0	0	0	15.8394	2.42352	4.07368	8.16469	1.54305	0	0	1.20859	4.6598	7.49014	6.65895	4.77408	0	24.8049	5.36866	0	29.351
MH0077.scaffold2466_21	28067	9	4			0	0	0	18	0	0	0	0	0	0	3.1551	1.74482	0	0	0	0	0	2.07856	2.59646	0	0	0	0	0	0	0	0	0	0	0	0	0	0	0	0	3.23644	0	7.88506	0	0	0	0	0.683888	0
MH0077.scaffold35530_1	17217	1	1			0	0	0	2	0	0	0	0	0	0	0	0	0	0	0	0	0	0	0	0	0	0	0	0	0	0	0	0	0	0	0	0	0	0	0	0	0	0	0	0	0	0	0	0
MH0077.scaffold39905_2	11006	38	31	Bacteroides_sp._4_3_47FAA_32443		0	1	0	43	0	1.84797	3.77665	0	0	3.04129	3.74754	0	0	14.5673	0	0	0	8.49126	0	0	8.19228	11.8417	0	0	0	0	0	0	0	0	7.73536	0	0	0	1.68143	7.18662	0	0	0	0	3.6036	12.3292	0	9.66918
MH0077.scaffold55219_7	22760	2	2			0	0	0	4	0	0	0	0	0	0	0	0	0	0	0	0	0	0	0	0	0	0	0	0	0	0	0	0	0	0	0	0	0	0	0	0	0	0	0	0	0	0	0	0
MH0077.scaffold75225_1	18563	1	1			0	0	0	1	0	0	0	0	0	0	0	0	0	0	0	0	0	0	0	0	0	0	0	0	0	0	0	0	0	0	0	0	0	0	0	0	0	0	0	0	0	0	0	0
MH0077.scaffold89554_1	27597	7	7			0	0	0	1	0	0	0	0	0	0	0	0	0	0	0	0	0	0	0	0	0	0	0	0	0	0	0	0	0	0	0	0	0	0	0	0	0	0	0	0	0	0	0	0
MH0077.scaffold9837_5	22385	81	32			0	0	0	9	0	0.61685	0	0	0	0	1.59141	0	0	0	0	0.292415	0	0	0	0	0	0	0	0	0	0	5.53177	0	0	0	0	0	0	0	0	0	0	0	0	0	0	2.33012	0	0
MH0077.scaffold9837_7	20064	25	20			0	0	0	9	0	0.55024	0	0	0	0	1.81941	0	0	0	0	0.293653	0	0	0	0	0	0	0	0	0	0	5.58261	0	0	0	0	0	0	0	0	0	0	0	0	0	0	2.30033	0	0
MH0077.scaffold98997_2	11223	2	2			0	0	0	4	0	0	0	0	0	0	0	0	0	0	0	0	0	0	0	0	0	0	0	0	0	0	0	0	0	0	0	0	0	0	0	0	0	0	0	0	0	0	0	0
MH0078.scaffold8390_3	104743	1	1			0	0	0	5	0	0	0	0	0	0	3.47751	0	0	0	0	0	0	0	0	0	0	0	0	0	0	0	0	0	0	0	0	0	0	0	0	0	0	0	0	0	0	0	0	0
MH0079.scaffold48694_4	10182	1	1			1	0	0	12	0	0	0	0	0	0	0	0	0	0	0	0	0	0	0	0	0	0	0	0	0	0	0	0	0	0	0	0	0	0	0	0.656735	0	0.780905	0	0	0	0	0	10.004
MH0080.scaffold16533_1	35454	2	1			0	0	0	7	0	0	0	0	0	0	0	0	0	0	0	0	0	0	0	0	0	0	0	0	0	0	0	0	0	0	0	2.04616	0	0	0	0	0	0	0	0	0	0	0	0
MH0080.scaffold21793_1	24677	2	2			0	1	0	16	0	0	0	0	0	0	0	0	0	0	0	0.20655	0	0	0	0	0	0	0	0	0.992428	0	0	1.21749	0	0.582857	0	0	0	0	0	0	0	0	0	0	0	0	0	0
MH0080.scaffold32256_3	18254	7	5			0	0	0	5	0	0.567152	0	0	0.728419	0	0	0	0	0	0	0	1.51443	0	0	0	0	0	0	0	0	0	0	0	0	0	0	0	0	0	3.05637	0	0	0	0	0	0	0	0	0
MH0080.scaffold77706_1	16966	6	2			0	0	0	8	0	0	0	0	0	0	0	0	5.59537	0	0	0.543691	0	0	0	0	0	0	0	0	0	0	0	0	0	0	0	0	0	0	0	0	0	0	0	0	0	0	0	0
MH0080.scaffold86858_1	12270	3	3		Roseburia_intestinalis_L1-82	0	1	0	9	0	0	0	0	0	0	0	0	0	0	0	0	0	0	0	0	0	0	0	0	0	3.72528	0	0.563889	0	0	0	0	0	0	0	0	0	6.21281	0	0	0	0	0	0
MH0080.scaffold92402_1	17893	1	1			0	0	0	1	0	0	0	0	0	0	0	0	0	0	0	0	0	0	0	0	0	0	0	0	0	0	0	0	0	0	0	0	0	0	0	0	0	0	0	0	0	0	0	0
MH0080.scaffold97187_1	11932	1	1			1	0	0	14	0	1.16093	3.6514	0	0	0	0	0	0	0	0.944073	0	0	0.870409	0	0	0	0	0	0	0	0	0	0	0.615559	0	0	0	0	0	0	6.21515	0	0	0	0	0	0	0	0
MH0080.scaffold99053_1	14741	5	3			1	1	0	2	0	0	0	7.02161	0	0	0	0	0	0	0	0	0	0	0	0	0	0	0	0	0	0	0	0	0	0	0	0	0	0	0	0	0	0	0	0	0	0	0	0
MH0080.scaffold99396_1	31344	11	10			1	1	0	4	0	0	0	0	0	0	0	0	0	0	0	5.5485	0	0	0	0	0	0	0	0	0	0	0	0	0	0	5.10936	0	0	0	0	0	0	0	0	0	0	0	0	0
MH0080.scaffold99422_1	11547	2	2			0	0	0	5	0	6.00475	0	0	0	0	2.05811	0	0	0	0	0	0	0	0	0	0	0	0	0	0	0	0	0	0	0	0	0	0	0	0	0	0	0	0	0	1.43057	0	0	0
MH0080.scaffold99874_1	37797	8	5			1	1	1	4	0	0	0	0	0	0	0	0	0	0	0	0	0	0	0	0	0	0	5.43338	0	0	0	0	0	0	0	0	6.70864	0	0	0	0	0	0	0	0	0	0	0	0
MH0081.scaffold4257_3	13617	1	1			0	0	0	1	0	0	0	0	0	0	0	0	0	0	0	0	0	0	0	0	0	0	0	0	0	0	0	0	0	0	0	0	0	0	0	0	0	0	0	0	0	0	0	0
MH0081.scaffold78847_4	12583	1	1			1	0	0	10	0	0	1.75666	0	0	0	0	0	0	0	0	0	0	0	0	0	2.09124	0	0	3.52332	0	0	0	0	0	0	2.78926	0	0	0	0	0	0	0	0	0	0	0	0	0
MH0081.scaffold82724_1	11560	13	9			0	0	0	5	0	0	0	0	0	0	0	0	0	0	0	0	0	0	0	0	0	0	0	0	0	0	0	1.35107	0	0	0	0	0	0	0	0	0	0	0	0	0	0	0	0
MH0081.scaffold99673_2	10068	3	1			0	0	0	1	0	0	0	0	0	0	0	0	0	0	0	0	0	0	0	0	0	0	0	0	0	0	0	0	0	0	0	0	0	0	0	0	0	0	0	0	0	0	0	0
MH0082.scaffold1604_12	24815	3	3			0	0	0	1	0	0	0	0	0	0	0	0	0	0	0	0	0	0	0	0	0	0	0	0	0	0	0	0	0	0	0	0	0	0	0	0	0	0	0	0	0	0	0	0
MH0082.scaffold18170_3	10770	1	1			0	0	0	12	0	24.2543	0	0	2.51602	0	0	0	0	0	0.90969	0	0	0	0	0	0	0	0	0	4.35897	0	0	0	0.987707	0	0	0	0	0	0	0	0	0	0	0	0	0	0	0
MH0082.scaffold18170_5	33060	6	4			0	0	0	16	0	32.6968	0.745419	0	3.02657	0	0	0	0	0	1.05378	0	0	0	0	0	0	0	0	0	5.04101	0	0	0	1.39537	0	0	0	0	0	0	0	0	0	0	0	0	0	0	0
MH0082.scaffold2969_8	14373	1	1			0	1	0	26	0	0	0	1.84176	0	0	1.91444	0	3.4762	1.56395	2.19747	3.04666	0	0	0	0	0	0	0	0	0	2.65034	3.34547	0	1.18705	0	0	0	1.14489	0	0.860918	0.834124	0	0	0	0	0	2.60558	0	0
MH0082.scaffold38564_1	18883	9	8			0	1	0	34	3.33415	0	0	0	0	0.260621	14.3684	0	0	0	0	0	0	1.77219	0	5.82063	0	0	0	0	0	0	0	0	0	3.85552	0	0	1.33286	2.5108	1.70109	0	0.603299	0	0	0.787308	0	0	0	0
MH0082.scaffold54315_2	13819	3	3			1	0	0	3	0	0	0	0	0	0	0	0	0	0	0	0	0	0	0	0	0	0	0	0	0	0	0	0	0	0	0	0	0	0	0	0	0	0	0	4.87651	0	0	0	0
MH0082.scaffold77342_4	14967	1	1			0	0	0	4	0	0	0	0	0	0	0	0	0	0	0	0	0	0	0	0	0	0	0	0	0	0	0	0	0	0	0	0	0	0	0	0	0	0	0	0	0	0	0	0
MH0083.scaffold10421_5	14750	6	5			0	0	0	77	0	4.61222	1.01942	3.16852	3.86813	5.01634	3.25654	2.38235	0.633913	5.51435	0.899837	2.99368	9.53728	3.63289	0	0	1.08112	0	0	3.00503	1.70081	2.70912	0.783364	1.83495	5.96491	0	4.15671	0	1.49391	3.08219	0.521521	2.42695	0	2.64492	3.22836	1.95833	1.4756	3.7694	0	0
MH0083.scaffold14109_3	12124	21	14			0	0	0	1	0	0	0	0	0	0	0	0	0	0	0	0	0	0	0	0	0	0	0	0	0	0	0	0	0	0	0	0	0	0	0	0	0	0	0	0	0	0	0	0
MH0083.scaffold1988_10	15020	16	10			1	1	0	4	0	0	0	0	0	1.80486	0	0	0	0	0	0	0	0.375222	0	0	0	0	0	0	0	0	0	0	0	0	0	0	0	0	0	9.60959	0	0	0	0	0	0	0	0
MH0083.scaffold20030_1	32726	1	1			0	0	0	4	0	0	0	0	0	0	0	0	0	0	0	0	0	0	0	0	0	0	0	0	0	0	0	0	0	0	0	0	0	0	0	0	0	0	0	0	0	0	0	0
MH0083.scaffold21736_4	24911	1	1			0	0	0	2	0	0	0	0	0	0	0	0	0	0	0	0	0	0	0	0	0	0	0	0	0	0	0	0	0	0	0	0	0	0	0	0	0	0	0	0	0	0	0	0
MH0083.scaffold24681_2	50393	3	3			0	0	0	5	0	0	0	0	0	0	0	0	0	0	0	0	0	0	0	0	0	0	0	0	0	0	0	0	0	0	0	0	0	0	0	0	0	0	0	0	0	0	0	0
MH0083.scaffold26904_2	32681	3	3			0	0	0	9	0	0	0	0	0	1.6885	0	0	0	0	0	0	0	0	0	0	0	0	0	0	0	0	0	0	0	0.533542	0	0	0	0	0	0	0	0	0	0	0	0	0	0
MH0083.scaffold34067_2	40646	4	4			0	0	0	17	0	0	0	0	0	0	0	0	0	0	0	0	0	0	0	0	0	0	0	0	0	0	0	0	0	1.69126	0	0	0	0	2.32993	1.71069	0	0	0	0	0	2.84722	0	0
MH0083.scaffold34297_11	10715	2	2			0	0	0	19	0	0	1.36142	0	0	0	0	3.50341	0	0	0.861715	0	0	0	0	0	0	0	0	0	0	0	0	0	0	0	0	0	0	0	0	0	0	0	0	2.08902	0	0	1.08793	0
MH0083.scaffold34570_1	10022	25	12			0	0	0	1	0	0	0	0	0	0	0	0	0	0	0	0	0	0	0	0	0	0	0	0	0	0	0	0	0	0	0	0	0	0	0	0	0	0	0	0	0	0	0	0
MH0083.scaffold37736_1	30105	2	2			0	0	0	2	0	0	0	0	0	0	0	0	0	0	0	0	0	0	0	0	0	0	0	0	0	0	0	0	0	0	0	0	0	0	0	0	0	0	0	0	0	0	0	0
MH0083.scaffold37736_2	16066	8	6			0	0	0	1	0	0	0	0	0	0	0	0	0	0	0	0	0	0	0	0	0	0	0	0	0	0	0	0	0	0	0	0	0	0	0	0	0	0	0	0	0	0	0	0
MH0083.scaffold5877_2	16491	2	2			0	0	0	2	0	0	0	0	0	0	0	0	0	0	0	0	0	0	0	0	2.51673	0	0	0	0	0	0	0	0	0	0	0	0	0	0	0	0	0	0	0	0	0	0	0
MH0083.scaffold59817_1	32085	63	32	Bacteroides_dorei_5_1_36/D4_32451	Bacteroides_sp._3_1_33FAA	0	0	0	4	0	0	0	0	0	0	0	0	0	0	0	0	0	0	0	0	0	0	0	0	0	0	0	0	0	0	0	0	0	0	0	0	0	0	0	0	0	0	0	0
MH0083.scaffold60623_1	12128	1	1			0	0	0	9	0	0	0	0	0	0	1.13996	0	0	0	0	0	0	0	0	0	0	0	0	0	0	0	0	0	0	0	0	0	0	0	0	0	0	0	0	0	0	0	0	0
MH0083.scaffold76915_2	11236	57	36	Bacteroides_sp._4_3_47FAA_32443		0	0	0	2	0	0	0	0	0	0	0	0	0	0	0	0	0	0	0	0	0	0	0	0	0	0	0	0	0	0	0	0	0	0	0	0	0	0	0	0	0	0	0	0
MH0083.scaffold87621_3	13998	3	3			0	0	0	2	0	0	0	0	0	0	0	0	0	0	0	0	0	0	0	0	0	0	0	0	0	0	0	0	0	0	0	0	0	0	0	0	0	0	0	0	0	0	0	0
MH0084.scaffold18207_1	30917	1	1		Roseburia_inulinivorans_DSM_16841	0	0	0	32	0	0	0	0	0	1.02815	0	5.09756	0	0	0	0	0	0.333058	0	0	0	0	0	0	0	0	0	0	0	0.911372	0	0	1.45306	0	1.49692	0	0	1.26526	0	0	0	0	0	0.799195
MH0084.scaffold24915_1	32316	6	3			0	1	0	5	0	0	0	0	0	9.07787	0	0	0	0	0	0	0	0	0	0	0	0	0	0	0	0	0	0	0	0	0	0	0	0	0	0	0	0	0	0	0	0	0	0
MH0084.scaffold3143_1	28921	13	10			0	1	1	24	0	0	0	0	0	0	0	0	0	25.3133	0	0	0	0	0	0	0	9.06992	0	0	0	0	0	0	0	0	0	3.01242	0	0	0	0	0	0	0	0	0	0	0	0
MH0084.scaffold45554_1	45250	46	28	Roseburia_intestinalis_L1-82_30005		0	0	0	1	0	0	0	0	0	0	0	0	0	0	0	0	0	0	0	0	0	0	0	0	0	0	0	0	0	0	0	0	0	0	0	0	0	0	0	0	0	0	0	0
MH0084.scaffold4682_1	29679	1	1			0	0	0	2	0	0	0	0	0	0	0	0	0	0	0	0	0	0	0	0	0	0	0	0	0	0	0	0	0	0	0	0	0	0	0	0	0	0	0	0	0	0	0	0
MH0084.scaffold4795_4	55315	1	1			0	0	0	9	0	0	0	2.21419	0	0	0	0	0	0	0	0	0	2.81662	0	2.79858	0	0	0	0	0	0	0	0	0	0	0	0	0	0	0	0	0	0	0	0	0	0	0	0
MH0084.scaffold50691_1	22717	6	5			0	0	0	1	0	0	0	0	0	0	0	0	0	0	0	0	0	0	0	0	0	0	0	0	0	0	0	0	0	0	0	0	0	0	0	0	0	0	0	0	0	0	0	0
MH0084.scaffold51456_1	35176	73	42			0	0	0	1	0	0	0	0	0	0	0	0	0	0	0	0	0	0	0	0	0	0	0	0	0	0	0	0	0	0	0	0	0	0	0	0	0	0	0	0	0	0	0	0
MH0084.scaffold6207_4	24217	3	3			0	0	0	1	0	0	0	0	0	0	0	0	0	0	0	0	0	0	0	0	0	0	0	0	0	0	0	0	0	0	0	0	0	0	0	0	0	0	0	0	0	0	0	0
MH0084.scaffold7764_3	19630	1	1			0	0	0	3	0	0	0	0	0	0	0	0	0	0	0	0	0	0	0	0	0	0	0	0	0	0	0	0	0	0	4.99043	0	0	0	0	0	0	0	0	0	0	0	0	0
MH0085.scaffold13328_5	27360	44	28			0	0	0	34	8.78294	0	0	2.01847	0	0	3.23152	2.33279	2.2911	0	0	0	0	0	0	1.54305	6.58086	0	0	0	0	0	0	26.0528	0	0	0	1.94296	0	0	0	0	1.03729	0.361959	2.51379	3.99461	0	0	0	0
MH0085.scaffold14272_1	21532	4	4			0	0	0	1	0	0	0	0	0	0	0	0	0	0	0	0	0	0	0	0	0	0	0	0	0	0	0	0	0	0	0	0	0	0	0	0	0	0	0	0	0	0	0	0
MH0085.scaffold15214_4	14089	1	1			0	1	0	1	0	0	0	0	0	0	0	0	0	0	0	0	0	0	0	0	0	0	0	0	0	0	0	0	0	0	0	0	0	0	0	0	0	0	0	0	0	0	0	0
MH0085.scaffold1815_5	11464	1	1			0	0	0	3	0	0	0	0	0	0	0	0	0	0	2.13145	0	0	0	0	0	0	0	0	0	0	0	0	0	0	0	0	0	0	0	0	0	0	0	0	0	0	0	0	0
MH0085.scaffold1996_1	51493	5	5		Bacteroides_sp._D20	0	0	0	10	0	0	0	0	0	0	0	0	0	0	0	0	0	0	0	0	0	0	0	0	0	0	0	0	0	0	2.94559	0	0	0	0	0	0	0	0	9.73958	0	0	0	0
MH0085.scaffold37908_3	27519	38	20			0	1	0	16	0	0	0	0	0	0	0	0	0	26.6574	0	1.13585	0	0	30.8962	0	0	0	0	0.402057	0	0	0	0	0	0	0	2.7056	0	0	0	0	0	0	0	4.72963	0	2.83503	0	0
MH0085.scaffold37908_6	23270	41	21			0	1	0	20	0	0	4.72202	0	0	0	0	0	0	23.6122	0	1.02389	0	0	31.8847	0	0	0	0	0	0	0	0	0	0	0	0	3.56341	0	0	0	0	0	0	0	5.28875	0	2.62352	0	0
MH0085.scaffold5100_2	55870	1	1			0	0	0	14	0	0	0	2.67556	0	0	0	0	0	0	0	0	0	0	0	0	0	0	0	0	0	0	0	0	0	4.15323	0	0	0	1.39105	0	0	1.28582	0	0	0	0	0	0	0
MH0085.scaffold6127_2	23105	1	1			0	0	0	23	0	0	1.08612	0	0	0	0	0	2.06211	0	0	1.85599	0	2.49772	0	1.88556	0	3.42223	3.48997	0	0	0	0	0	0	0	2.60108	0	0	0	0	0	0	0	0	0	0	0	0	0
MH0085.scaffold7191_1	13299	1	1		Bacteroides_sp._4_3_47FAA	0	1	1	118	23.8697	17.933	22.0514	22.5055	22.3449	18.4653	12.1538	27.5014	9.46592	49.4845	15.0429	10.834	16.4371	19.1456	27.8227	47.4111	27.7411	46.096	35.6563	57.9626	16.2972	7.42121	18.2891	0	25.6358	17.4342	36.7854	19.9841	5.75593	7.34951	22.6747	26.0854	16.9583	21.5201	26.0828	24.8705	14.6201	35.8195	15.6609	31.6952
MH0086.scaffold103753_2	47096	12	11			0	0	0	1	0	0	0	0	0	0	0	0	0	0	0	0	0	0	0	0	0	0	0	0	0	0	0	0	0	0	0	0	0	0	0	0	0	0	0	0	0	0	0	0
MH0086.scaffold103753_5	26344	7	6	Roseburia_intestinalis_L1-82_30005		0	0	0	1	0	0	0	0	0	0	0	0	0	0	0	0	0	0	0	0	0	0	0	0	0	0	0	0	0	0	0	0	0	0	0	0	0	0	0	0	0	0	0	0
MH0086.scaffold10615_2	13457	5	5			0	1	0	75	2.02848	1.98121	0	4.53778	2.04233	0.908446	0	1.63861	4.55658	0	0.794232	2.32876	0	3.33811	1.78733	0	2.88314	0	0	0	8.07693	4.5907	2.95754	1.43442	4.1816	1.21932	2.46523	0	3.26168	2.44138	2.4215	1.27128	3.54668	0	7.15047	3.11732	2.27756	0	3.36709	3.29279
MH0086.scaffold108085_1	28857	2	2			0	0	0	16	0	0	0	0	0	0	0	0	0	0.795381	2.58257	0	0	1.9038	0	0	0	0	0	0	0	0	0	0	0.440548	0.877205	0	0	0	0	0.577438	0.739891	0	0.562038	0	0	1.71545	2.09177	0	0
MH0086.scaffold108085_2	10905	1	1			0	0	0	16	0	0	0	0	0	0	0	0	0	0.850662	2.38173	0	0	1.79271	0	0	0	0	0	0	0	0	0	0	0.476226	0.930628	0	0	0	0	0.670792	0.525527	0	0.5987	0	0	1.5836	2.02211	0	0
MH0086.scaffold109528_2	17605	18	17			0	1	0	19	0	0	2.79966	0	0	0	0	0	0	19.9265	0	0.749209	0	0	21.9455	0	0	0	0	0	0	0	0	0	0	0	0	2.27585	0	0	0	0	0	0	0	4.93924	0	2.35514	0	0
MH0086.scaffold13209_4	11123	31	22		Clostridium_scindens_ATCC_35704	0	0	0	49	2.74742	1.40611	0	0	0	0.513617	0	4.20567	1.2605	0	4.44606	1.39748	0	0.506287	1.32689	0	1.73059	0	0	0	1.83132	0	0	0	0.756709	1.75181	0	0	1.43961	0	3.9167	0	0.564942	4.40506	0.477264	0	0	0	0	0
MH0086.scaffold23668_4	35285	1	1		Alistipes_putredinis_DSM_17216	0	0	0	2	0	0	0	0	0	0	0	0	0	0	0	0	0	0	0	0	0	0	0	0	0	0	0	0	0	0	0	0	0	0	0	0	0	0	0	0	0	0	0	0
MH0086.scaffold31644_2	10933	12	8		Blautia_hansenii_DSM_20583	1	1	0	91	0	2.95296	0	1.85735	3.84292	3.00042	18.8663	0	0.966852	2.27644	2.70304	0.394302	0	0.576217	1.67694	5.3583	2.28684	0	1.23897	5.17419	9.08336	0	1.47916	0	2.19461	4.12106	0	4.55613	0.492645	1.83724	1.0401	1.69792	0.836678	0.834468	0.660324	2.91558	0	0.649251	0.851454	15.1931
MH0086.scaffold31644_3	19435	8	8		Ruminococcus_gnavus_ATCC_29149	1	1	0	75	0	2.49337	0	1.66395	3.0293	2.38808	15.4421	0	0.770672	1.91576	2.02328	0.290214	0	0.47162	0	4.04701	2.06243	0	0	4.23329	5.92319	0	0	0	1.45932	3.45513	0	3.78408	0.675142	1.21662	0.920267	1.23563	0	0.619319	0	2.09827	0	0	0.680475	16.1944
MH0086.scaffold32272_1	22334	1	1			0	0	0	5	0	0	0	0	0	0	0	0	0	0	0	0	0	0	0	0	0	0	0	0	0	0	0	0	0	0	0	0	0	0	0	0	0	0	0	0	0	0	0	0
MH0086.scaffold36990_8	17691	2	2			0	0	0	6	0	0	0	0	0	0	0	0	0	0	0	0	0	0	0	0	0	0	0	0	0	0	0	0	0	0	0	0	0	0	0	0	0	0	0	0	0	2.60846	0	0
MH0086.scaffold5584_5	15290	3	2			0	0	1	19	0	0	0	0	0	0	0	0	0	1.84597	1.636	0	0	0	0	0	0	0	0	2.37926	0	0	0	0	0	0	0	0	0	0	0	0	0	0	0	0	0	0	0	0.527359
MH0086.scaffold6117_3	17297	9	6			0	0	0	5	0	0	0	0	0	0	0	0	0	0	0	0	0	0	5.19703	0	0	0	0	0	0	0	0	0	0	0	0	0	0	0	0	0	0	0	0	0	0	0	0	0
MH0086.scaffold6468_4	29480	5	5	Ruminococcus_sp._5_1_39BFAA_32503	Ruminococcus_sp._5_1_39BFAA	0	0	0	6	0	0	0	0	0	0.558071	0	0	0	0	0	0	0	0	0	0	0	0	0	0	0	0	0	0	0	0	0	0	0	0	0	0	0	0	0	0	0	0	0	0
MH0086.scaffold6468_6	46117	15	14	Ruminococcus_sp._5_1_39BFAA_32503	Ruminococcus_sp._5_1_39BFAA	0	0	0	7	0	0	0	0	0	0.771456	0	0	0	0	0	0	0	0	0	0	0	0	0	0	0	0	0	0	0	0	0	0	0	0	0	0.474965	0	0	0	0	0	0	0	0
MH0086.scaffold70449_5	32381	9	7		Bacteroides_vulgatus_PC510	0	0	0	17	0	0	0	0	0	1.74346	0	0	0.38205	4.01838	0	0	0	4.29139	0	0	0	0	0	0	0	0	0	0	5.94374	1.17188	0	0	0	0	0	0	0	0	1.99124	9.30951	3.22439	11.6233	0	0
MH0086.scaffold89372_3	11190	1	1			0	0	0	11	0	0	0	0	0	0	0	0	0	0	0	0	0	0	0	0	0	0	0	0	0	0	0	0	0	0	0	0	0	0	0	0	0	0	0	0	0	0	0	0
MH0086.scaffold98531_1	11630	3	3			0	0	0	13	0	0	0	0	0	0	0	0	0	0	0	0	0	0	2.43724	0	0	0	0	0	0	0	0	0	0	0	0	0	0	0	0	0.83431	0	0.658173	0.99477	0	0	0	0.432195	0
O2.UC-1.scaffold15189_1	15856	1	1			0	0	0	9	1.37391	0	0	0	0	0	0	0	0	0	0	0	0	0	0	0	0	0	0	2.19067	0	0	0	0	0	0	0	0	0	0	0	0	0	0	0	0	0	0	0	0
O2.UC-1.scaffold16664_3	13771	2	2			0	0	0	18	0	0	0	0	0	0	0	0	0	0	0	0	0	0	0	0.948803	0	0	0	0	0	0	0	0	0	2.00578	0	0.834622	0	0	0	0	0	0	0	0	0	0	0	0
O2.UC-1.scaffold32901_1	12304	2	2			0	0	0	3	0	0	0	0	0	0	0	0	0	0	0	0	0	0	0	0	0	0	0	0	0	0	0	0	0	0	0	0	0	0	0	0	0	0	0	0	0	0	0	0
O2.UC-1.scaffold3798_4	11564	4	4			0	0	0	3	0	0	0	0	0	0	0	0	0	0	0	0	0	0	0	0	0	0	0	0	0	0	0	0	0	0	0	0	0.866052	0	0	0	0	0	0	0	0	0	0	0
O2.UC-1.scaffold6407_1	27332	26	21			0	0	0	35	8.06675	0	0	2.23877	0	0	3.27266	2.702	1.74318	0	0	0	0	0	0	1.87428	7.30752	0	0	0	0	0	0	22.0336	0	0	0	2.01364	0	0	0	0.490416	0.930148	0.381646	2.14215	3.54573	0	0	0	0
O2.UC-1.scaffold6710_1	16585	1	1			0	0	0	3	0	0	0	0	0	0	0	0	0	0	0	0	0	0	0	0	0	0	0	0	0	0	0	0	0	0	0	0	0	0	0	0	0	0	0	0	0	0	0	0
O2.UC-1.scaffold9159_1	14305	2	2			0	0	0	5	0	0	0	0	0	3.13102	0	0	0	0	0	0	0	0	0	0	0	0	0	0	0	0	0	0	0.591804	0	0	0	0	0	0	0	0	0	0	0	0	0	0	0
O2.UC-11.scaffold13191_3	26411	1	1		Bacteroides_plebeius_DSM_17135	0	0	1	48	0	0	25.3166	0	0	0	0	0	0	0	37.3627	0	0	1.43848	0	0	0	0	0	25.4019	4.50148	27.9239	0	0	4.21619	0	0	0	0	0	0	0	0	0	1.53105	0	4.3371	0	0	0
O2.UC-11.scaffold17317_1	20706	1	1		Bacteroides_coprocola_DSM_17136	0	0	0	1	0	0	0	0	0	0	0	0	0	0	0	0	0	0	0	0	0	0	0	0	0	0	0	0	0	0	0	0	0	0	0	0	0	0	0	0	0	0	0	0
O2.UC-11.scaffold2084_4	25553	2	2		Bacteroides_coprocola_DSM_17136	0	0	0	30	2.68201	2.16984	0	0	0	2.47919	0	0	0	0	0	0.703557	0	0	2.33532	0	0	0	0	41.3778	1.78671	2.39571	0	26.9201	8.47874	0	0	0	0	0	0	0	8.78086	0	14.7101	0	0	0	0	9.81684
O2.UC-11.scaffold3901_1	16041	9	6			0	0	0	1	0	0	0	0	0	0	0	0	0	0	0	0	0	0	0	0	0	0	0	0	0	0	0	0	0	0	0	0	0	0	0	0	0	0	0	0	0	0	0	0
O2.UC-11.scaffold3901_2	14408	3	3			0	0	0	4	0	0	0	0	0	0	0	1.68691	0	0	0	0	0	0	0	0	0	0	0	0	0	0	0	0	0	0	0	0	0	0	0	0	0	0	0	0	0	0	0	0
O2.UC-11.scaffold7355_2	46631	4	2			0	0	0	3	0	0	0	0	0	0	0	0	0	0	4.10751	0	0	0	0	0	0	0	0	0	0	0	0	0	0	0	0	0	0	0	0	0	0	0	0	0	0	0	0	0
O2.UC-11.scaffold7355_3	42518	1	1			0	0	0	4	0	0	0	0	0	0	0	0	0	0	4.79538	0	0	0	0	0	0	0	0	0	0	0	0	0	0	0	0	0	0	0	0	0	2.38517	0	0	0	0	0	0	0
O2.UC-12.scaffold10256_1	13447	25	15			0	0	1	27	0	0	0	0	0	2.37895	3.46938	0	0	0	0	0	1.92786	5.58844	0	0	0	11.5361	0	0	0	0	0	0	0	0	6.15867	0	0	0	1.92597	4.52459	0	0	0	0	2.75367	3.38427	0	0
O2.UC-12.scaffold10767_4	13638	1	1			0	0	0	2	0	0	0	0	0	0	0	0	0	0	0	0	0	0	0	0	0	0	0	0	0	0	0	0	0	0	0	0	0	0	0	0	0	0	0	0	0	0	0	0
O2.UC-12.scaffold35713_1	14464	7	6			0	0	0	3	0	0	0	0	0	0	0	0	0	0	0	0	0	0	0	0	0	0	0	0	0	0	0	0	0	0	0	0	0	0	0	0	0	0	0	0	0	0	0	0
O2.UC-12.scaffold42018_1	12398	3	3		Eubacterium_siraeum_DSM_15702	0	0	0	2	0	0	0	0	0	0	0	0	0	0	0	0	0	0	0	0	0	0	0	0	0	0	0	0	0	0	0	0	0	0	0	0	0	0	0	0	0	0	0	0
O2.UC-12.scaffold48503_1	23688	2	2			0	1	0	25	0	0	0	1.46381	0	0	2.12129	0	2.17666	0	1.53039	3.20569	0	0	0	0	0	0	0	0	0	1.95461	3.49214	0	1.62815	0	0	0	0.907294	0	0.715261	0	0	0	0	1.30111	0	2.08258	0	0
O2.UC-13.scaffold12808_1	44350	26	23			0	0	0	1	0	0	0	0	0	0	0	0	0	0	0	0	0	0	0	0	0	0	0	0	0	0	0	0	0	0	0	0	0	0	0	0	0	0	0	0	0	0	0	0
O2.UC-13.scaffold14173_2	24810	10	7			0	0	0	17	0	0	0	0	0	0	0	0	0	0	0	0	0	12.8122	0	0	0	0	0	0	0	0	0	0	0.743911	0	0	0	0	0	0	0	0	10.923	0	0	0	0	0	0
O2.UC-13.scaffold16107_3	17077	28	18			1	1	1	56	1.91067	0	0	6.55035	6.08067	9.16497	20.1714	0	3.46835	0	1.30057	12.0195	0	0	0	2.19741	8.07625	0	2.60713	0	9.86725	21.4925	0	1.91973	0	0	3.12694	18.6329	43.7785	12.3959	2.45636	2.06275	0	21.0343	3.02234	0	5.38184	1.16311	9.74292	1.04212
O2.UC-13.scaffold2488_1	10339	19	10			0	0	0	1	0	0	0	0	0	0	0	0	0	0	0	0	0	0	0	0	0	0	0	0	0	0	0	0	0	0	0	0	0	0	0	0	0	0	0	0	0	0	0	0
O2.UC-13.scaffold24953_2	18791	2	1			0	0	0	2	0	0	0	0	0	0	0	0	0	0	0	0	0	0	0	0	0	0	0	0	0	0	0	0	0	0	0	0	0	0	0	0	0	0	0	0	0	0	0	0
O2.UC-13.scaffold2698_1	12134	1	1			0	0	0	3	0	0	0	0	0	0	0	0	0	0	0	0	0	0	0	0	0	0	0	0	0	0	0	0	0	0	0	0	0	0	0	0	0	0	0	0	0	0	0	0
O2.UC-13.scaffold31021_2	22526	63	19			0	0	0	5	0	0	0	0	0	0.636102	0	0	0	0	0	0	0	0	0	0	0	0	0	0	0	0	0	0	0	0	0	0	0	0	0	0	0	21.2593	0	0	0	0	0	0
O2.UC-13.scaffold318_5	12124	42	14			0	0	0	2	0	0	0	0	0	0	0	0	0	0	0	0	0	0	0	0	0	0	0	0	0	0	0	0	0	0	0	0	0	0	0	0	0	16.5652	0	0	0	0	0	0
O2.UC-13.scaffold48461_3	14628	1	1			0	0	0	2	0	0	0	0	0	0	0	0	0	0	0	0	0	0	0	0	0	0	0	0	0	0	0	0	0	0	0	0	0	0	0	0	0	0	0	0	0	0	0	0
O2.UC-13.scaffold6592_1	10076	3	2			0	0	0	1	0	0	0	0	0	0	0	0	0	0	0	0	0	0	0	0	0	0	0	0	0	0	0	0	0	0	0	0	0	0	0	0	0	0	0	0	0	0	0	0
O2.UC-14.scaffold879_14	22225	1	1			0	0	0	38	4.04012	5.08025	0	0	0	0.974957	15.3554	0	0	0	2.73511	2.4994	0	3.78054	0	0	0	0	0	0	0	0	4.09395	0	0	5.76053	0	4.13503	1.29357	1.54911	0	0	0	16.5728	4.28309	0	0	0	6.55755	1.42201
O2.UC-16.scaffold1286_1	27961	6	6			0	0	0	11	0	0	0	0	0	0.383871	0	0	1.16427	0	4.98329	0	0	0	0	0	0	0	0	0	0	0	0	0.855052	0	0	0	0	0	0	0	0	0	0	0	0	0	0	0	0
O2.UC-16.scaffold1286_2	13220	2	2			0	0	0	11	0	0	0	0	0	0.689085	0	0	0.860514	0	2.97562	0	0	0	0	0	0	0	0	0	0	0	0	2.02254	0	0	0	0	0	0	0	0	0	0	0	0	0	0	0	0
O2.UC-16.scaffold997_3	13486	1	1			0	0	0	19	0	10.4688	0	0	0	0	5.65915	1.90829	0	0	0	0	0	0	0	0	0	0	0	0	0	0	0	0	2.50511	2.35689	0	0	0	1.26469	0	0	0	0	0	0	0	0	0	0
O2.UC-17.scaffold13561_1	15153	28	19			0	0	0	1	0	0	0	0	0	0	0	0	0	0	0	0	0	0	0	0	0	0	0	0	0	0	0	0	0	0	0	0	0	0	0	0	0	0	0	0	0	0	0	0
O2.UC-17.scaffold13561_3	16092	17	9			0	0	0	1	0	0	0	0	0	0	0	0	0	0	0	0	0	0	0	0	0	0	0	0	0	0	0	0	0	0	0	0	0	0	0	0	0	0	0	0	0	0	0	0
O2.UC-17.scaffold1986_3	11932	29	21			0	0	0	10	0	0	0	0	0	0	4.07824	0	0	0	0	0	0	0	0	0	0	0	0	0	0	0	0	0	0	0	0	0	0	0	0	0	0	0	0	0	2.00278	13.6422	0	0
O2.UC-17.scaffold35240_2	61754	3	2			1	0	0	14	0	0	0	0	0	0	0	0	0	0	0	0	0	0	0	0	0	0	0	0	0	0	0	0	0	0	0	0	0	0	0	1.3271	0	0.910457	0	0	0	0	0	14.7015
O2.UC-17.scaffold3853_2	17276	1	1			0	0	0	3	0	0	0	0	0	0	0	0	0	0	0	0	0	0	0	0	0	0	0	0	0	0	0	0	0	0	0	0	0	0	0	0	0	0	0	0	0	0	0	0
O2.UC-17.scaffold5768_1	37961	6	6			0	0	0	1	0	0	0	0	0	0	0	0	0	0	0	0	0	0	0	0	0	0	0	0	0	0	0	0	0	0	0	0	0	0	0	0	0	0	0	0	0	0	0	0
O2.UC-17.scaffold8547_2	19986	68	43			0	0	0	1	0	0	0	0	0	0	0	0	0	0	0	0	0	0	0	0	0	0	0	0	0	0	0	0	0	0	0	0	0	0	0	0	0	0	0	0	0	0	0	0
O2.UC-17.scaffold9066_2	18082	1	1		Acidaminococcus_sp._D21	0	0	0	13	0	0	0	0	0	0	0	0	0	0	0	0	0	0	0	0	0	0.998101	0	0	0	0	0	0	0	0	0	0	0	0	0	0	0	0	0	0	0	0	0	0
O2.UC-18.scaffold1028_1	11543	12	12			1	0	0	3	0	0	0	0	0	0	0	0	0	0	0	0	0	0	0	0	0	0	0	0	0	0	0	0	0	0	0	0	0	0	0	0	0	0	0	0	0	0	0	0
O2.UC-18.scaffold10680_2	11299	15	12			0	0	0	4	0	0	0	0	0	0	0	0	0	0	0	0	0	0	0	0	0	0	0	0	0	0	0	0	0	0	0	0	0	0	0	0	0	0	0	0	0	0	0	0
O2.UC-18.scaffold192_7	18318	5	4			0	1	0	37	0.834498	0	0	0	2.58618	0	1.50287	0	1.06396	0	0.903272	0.917251	0	0	0	0	0	0	0	0	0	1.44085	0	0.934457	4.10207	0	0	0	1.16816	2.356	1.75582	2.11915	0	0	2.42073	0	0.946632	2.82129	0	1.04486
O2.UC-18.scaffold2660_10	18945	1	1			0	0	0	1	0	0	0	0	0	0	0	0	0	0	0	0	0	0	0	0	0	0	0	0	0	0	0	0	0	0	0	0	0	0	0	0	0	0	0	0	0	0	0	0
O2.UC-18.scaffold3130_5	14118	1	1			0	0	0	1	0	0	0	0	0	0	0	0	0	0	0	0	0	0	0	0	0	0	0	0	0	0	0	0	0	0	0	0	0	0	0	0	0	0	0	0	0	0	0	0
O2.UC-18.scaffold6622_1	19315	18	16			0	0	0	2	0	0	0	0	0	0	0	0	0	0	0	0	0	0	0	0	0	0	0	0	0	0	0	0	0	0	0	0	0	0	0	0	0	0	0	0	0	0	0	0
O2.UC-18.scaffold886_6	10137	1	1			0	1	0	31	0	1.20867	0	1.58831	0	0.226071	0	0	1.15556	0	1.42547	0	0	0	1.39536	1.04295	0	0	0	0.413854	0	0	0	0	2.78646	0	0	2.23455	0	0	0	0.948089	0	0	0	0	0	0.749002	0.468651	2.69002
O2.UC-19.scaffold102056_1	28364	50	26			0	0	0	1	0	0	0	0	0	0	0	0	0	0	0	0	0	0	0	0	0	0	0	0	0	0	0	0	0	0	0	0	0	0	0	0	0	0	0	0	0	0	0	0
O2.UC-19.scaffold13428_4	10024	1	1			0	0	0	2	0	0	0	0	0	0	0	0	0	0	0	0	0	0	0	0	0	0	0	0	0	0	0	0	0	0	0	0	0	0	0	0	0	0	0	0	0	0	0	0
O2.UC-19.scaffold17094_1	55547	9	6		Bacteroides_stercoris_ATCC_43183	1	1	0	34	1.66506	0	35.1348	3.75344	3.55331	0	0	0	1.57764	0	0	0	0	0	0	4.44148	15.7273	0	0	4.75023	0	0	0	0	18.3529	1.39013	0	19.9594	0	0	0	0	0	0	0	0	0	0	14.7362	6.53735
O2.UC-19.scaffold2500_4	21569	1	1			0	0	0	25	0	0	0	1.44656	54.2118	0	0	0	0	0	0	4.29501	0	0	0	0	0	16.8355	0	0	0	0	0	0	0	8.07798	0	0	19.4588	5.45182	0	0	13.7539	0	0	0	0	0	0	0
O2.UC-19.scaffold4071_6	15929	2	2		Bacteroides_sp._3_1_33FAA	0	0	0	6	0	0	0	0	0	1.62302	0	0	0	0	0	0	0	0	0	0	0	0	0	0	0	0	0	0	0	0	4.82846	0	0	0	0	0	0	0	0	0	0	7.47856	0	0
O2.UC-19.scaffold5902_5	17272	4	3			0	0	0	2	0	0	0	0	0	0	0	0	0	0	0	0	0	0	0	0	0	0	0	0	0	0	0	0	0	0	0	0	0	0	0	0	0	0	0	0	0	0	0	0
O2.UC-19.scaffold63330_1	12531	29	18			0	0	0	2	0	0	0	0	0	0	0	0	0	0	0	0	0	0	0	0	0	0	0	0	0	0	0	0	0	0	0	0	0	0	0	0	0	0	0	0	0	0	0	0
O2.UC-19.scaffold66851_1	25807	77	28			0	0	0	6	0	0	0	0	0	0	0	0	0	0	0	0	0	0	0	0	0	0	0	0	0	0	0	0	0	0	0	0	0	0	0	0	0	0	0	0	0	0	0	0
O2.UC-19.scaffold72423_1	38181	1	1			0	0	0	1	0	0	0	0	0	0	0	0	0	0	0	0	0	0	0	0	0	0	0	0	0	0	0	0	0	0	0	0	0	0	0	0	0	0	0	0	0	0	0	0
O2.UC-19.scaffold72794_6	24070	2	2			0	0	0	6	0	0	0	0	0	3.0083	0	0	0	0	0	0	0	0	0	0	0	4.63133	0	0	0	0	0	0	0	0	0	0	0	0	0	0	0	0	0	0	0	0	0	0
O2.UC-19.scaffold72794_7	12835	1	1			0	0	0	6	0	0	0	0	0	0.285513	0	0	0	0	0	0	0	0	0	0	0	4.17038	0	0	0	0	0	0	0	0	0	0	0	0	0	0	0	0	0	0	0	0	0	0
O2.UC-19.scaffold74061_3	14363	8	1			0	0	0	1	0	0	0	0	0	0	0	0	0	0	0	0	0	0	0	0	0	0	0	0	0	0	0	0	0	0	0	0	0	0	0	0	0	0	0	0	0	0	0	0
O2.UC-19.scaffold74061_5	32003	1	1			0	0	0	1	0	0	0	0	0	0	0	0	0	0	0	0	0	0	0	0	0	0	0	0	0	0	0	0	0	0	0	0	0	0	0	0	0	0	0	0	0	0	0	0
O2.UC-20.scaffold15641_5	10375	6	5			0	0	0	1	0	0	0	0	0	0	0	0	0	0	0	0	0	0	0	0	0	0	0	0	0	0	0	0	0	0	0	0	0	0	0	0	0	0	0	0	0	0	0	0
O2.UC-20.scaffold20333_3	33203	16	12			0	0	0	5	0	0	0	0	0	0	0	0	0	0	0	0	0	0	0	0	0	0	0	0	0	0	0	0	0	0	0	0	0	0	0	0	0	0	0	0	0	0	0	0
O2.UC-20.scaffold31939_2	16343	13	12			0	1	0	17	0	0	0	0	0	0	0	0	0	1.58248	1.33778	0	0	0	0	0	0	0	0	2.38385	0	0	0	0	0	0	0	0	0	0	0	0	0	0	0	0	0	0	0	0
O2.UC-20.scaffold38526_3	21511	1	1			0	0	0	6	0	0	0	0	0	0	0	0	0	0	0	0	0	0	0	0	0	0	0	0	0	0	0	0	0	0	0	0	0	0	0	0.557855	0	0	0	0	0	0	0	0
O2.UC-20.scaffold48962_1	16526	8	7		Bacteroides_vulgatus_PC510	1	0	0	27	0	0	4.44885	0	0	1.23359	2.09329	0	0	0	0	0	0	3.39191	0	0	8.90223	6.96385	0	0	0	0	0	0	0	0	6.243	0	0	0.549317	0	4.44545	2.07028	0	0	0	3.22646	12.2336	0	10.8343
O2.UC-20.scaffold49118_4	18521	1	1			0	0	0	1	0	0	0	0	0	0	0	0	0	0	0	0	0	0	0	0	0	0	0	0	0	0	0	0	0	0	0	0	0	0	0	0	0	0	0	0	0	0	0	0
O2.UC-20.scaffold85126_1	23409	33	23			0	0	0	1	0	0	0	0	0	0	0	0	0	0	0	0	0	0	0	0	0	0	0	0	0	0	0	0	0	0	0	0	0	0	0	0	0	0	0	0	0	0	0	0
O2.UC-20.scaffold85296_1	15081	1	1			0	0	0	1	0	0	0	0	0	0	0	0	0	0	0	0	0	0	0	0	0	0	0	0	0	0	0	0	0	0	0	0	0	0	0	0	0	0	0	0	0	0	0	0
O2.UC-20.scaffold85766_1	12638	4	4		Bacteroides_stercoris_ATCC_43183	1	1	0	46	2.16204	0	53.6419	35.9335	5.12376	0	1.91939	0	2.26901	0	0	0	2.01112	0	0	7.45416	19.2638	0	0	6.96379	0	0	0	0	22.5706	2.41167	0	18.0119	0	0	0	0	0.952699	0	0	0	0	0	25.0595	8.72711
O2.UC-20.scaffold86151_1	14720	11	9			0	0	0	1	0	0	0	0	0	0	0	0	0	0	0	0	0	0	0	0	0	0	0	0	0	0	0	0	0	0	0	0	0	0	0	0	0	0	0	0	0	0	0	0
O2.UC-22.scaffold1175_6	37707	6	5		Alistipes_putredinis_DSM_17216	0	1	0	22	0	5.29468	0	0	0	0	0	0	0	0	0	0	4.46725	0	1.20956	5.67144	0	0	0	0	0	0	0	0	0	0	3.40758	3.71777	0	0	4.11196	0	0	0	0	0	0	0	7.64382	0
O2.UC-22.scaffold18247_2	17261	74	25			1	1	0	2	0	0	0	0	0	1.31102	0	0	0	0	0	0	0	0	0	0	0	0	0	0	0	0	0	0	0	0	0	0	0	0	0	0	0	0	0	0	0	0	0	0
O2.UC-22.scaffold2922_2	42418	9	7			0	0	0	4	0	0	0	0	0	0	0	0	0	0	0	0	0	0	0	0	0	0	0	0	0	0	0	0	0	0	0	0	0	0	0	0	0	0	0	0	0	0	0	0
O2.UC-22.scaffold3239_3	26734	1	1			0	0	0	3	0	0	0	0	0	0	0	0	0	0	0	0.63472	0	0	0	0	0	0	0	0	0	0	0	0	0	0	0	0	0	0	0	0	0	0	0	0	0	0	0	0
O2.UC-22.scaffold3830_1	24798	15	14			0	0	0	1	0	0	0	0	0	0	0	0	0	0	0	0	0	0	0	0	0	0	0	0	0	0	0	0	0	0	0	0	0	0	0	0	0	0	0	0	0	0	0	0
O2.UC-22.scaffold43274_1	11614	20	15			0	0	0	4	0	0	1.59254	0	0	0	0	0	0	0	0	0	0	0	0	0	0	0	0	0	0	1.02589	0	0	0	0	0	0	0	0	0	0	0	0	0	0	0	0	0	0
O2.UC-22.scaffold5748_1	10044	16	11			0	0	0	2	0	0	0	0	0	0	0	0	0	0	0	0	0	0	0	0	0	0	0	0	0	0	0	0	0	0	0	0	0	0	0	0	0	0	0	0	0	0	0	0
O2.UC-22.scaffold73624_1	11231	42	18	Dialister_invisus_DSM_15470_33143		0	0	0	1	0	0	0	0	0	0	0	0	0	0	0	0	0	0	0	0	0	0	0	0	0	0	0	0	0	0	0	0	0	0	0	0	0	0	0	0	0	0	0	0
O2.UC-22.scaffold84785_1	29357	1	1			0	0	0	16	4.46406	1.11761	0	0	0	0	0	0	0	1.76925	0	32.1022	0	0	0	0	0	0	0	106.239	0	0	0	0	0	59.8489	3.41201	0	0	0	0	0	0	0	0	0	0	24.3563	0	0
O2.UC-23.scaffold62780_1	24643	1	1		Bacteroides_plebeius_DSM_17135	0	0	1	10	0	0	0	0	0	0	0	0	0	0	0	0	0	0	0	0	0	0	0	0	0	0	1.75842	0	0	0	0	0	0	0	0	0	0	0	1.57218	0	0	0	0	0
O2.UC-24.scaffold20350_2	57283	10	5			0	0	0	2	0	0	0	0	0	0	0	0	0	0	0	0	0	0	0	0	0	0	0	0	0	0	0	0	0	0	0	0	0	0	0	0	0	0	0	0	0	0	0	0
O2.UC-24.scaffold24092_4	21235	10	8			0	0	0	1	0	0	0	0	0	0	0	0	0	0	0	0	0	0	0	0	0	0	0	0	0	0	0	0	0	0	0	0	0	0	0	0	0	0	0	0	0	0	0	0
O2.UC-24.scaffold27268_1	13863	1	1			0	0	0	1	0	0	0	0	0	0	0	0	0	0	0	0	0	0	0	0	0	0	0	0	0	0	0	0	0	0	0	0	0	0	0	0	0	0	0	0	0	0	0	0
O2.UC-24.scaffold2873_2	53925	3	1			0	0	0	1	0	0	0	0	0	0	0	0	0	0	0	0	0	0	0	0	0	0	0	0	0	0	0	0	0	0	0	0	0	0	0	0	0	0	0	0	0	0	0	0
O2.UC-24.scaffold2983_2	74752	15	12			0	0	0	1	0	0	0	0	0	0	0	0	0	0	0	0	0	0	0	0	0	0	0	0	0	0	0	0	0	0	0	0	0	0	0	0	0	0	0	0	0	0	0	0
O2.UC-24.scaffold3140_2	52057	1	1			0	0	0	1	0	0	0	0	0	0	0	0	0	0	0	0	0	0	0	0	0	0	0	0	0	0	0	0	0	0	0	0	0	0	0	0	0	0	0	0	0	0	0	0
O2.UC-24.scaffold3302_12	24239	16	10			0	0	0	2	0	0	0	0	0	0	0	0	0	0	0	0	0	0	0	0	0	0	0	0	0	0	0	0	0	0	0	0	0	0	0	0	0	0	0	0	0	0	0	0
O2.UC-24.scaffold47867_6	13352	27	16			0	0	0	37	0.761186	2.5494	0	0	0	0	1.0134	0	0	3.22887	1.76155	2.84483	0	0	0	0	0	0	0	0.702842	0	0	0	0	0	1.56646	0	1.23635	1.07072	0	0	1.49054	0	0	0	0	0	0.475653	0	0
O2.UC-24.scaffold64845_1	12079	17	1			0	0	0	4	0	0	0	0	0	0	0	0	0	0	0	0	0	0	0	0	0	0	0	0	0	0	0	0	0	0	0	0	0	0	0	0	0	0	0	0	0	0	0	0
O2.UC-24.scaffold7305_2	13580	25	14			1	1	1	88	2.23262	3.35875	0	6.24606	5.58411	15.0119	31.8131	0	5.87798	0	0	22.581	7.43702	3.49531	4.68684	1.99811	12.0821	0	3.34834	0	16.152	29.9088	16.2721	2.06972	2.61632	6.26445	4.69877	17.0872	72.8712	15.9943	3.85872	2.54811	0.869157	27.4749	4.82751	0.833403	8.11376	1.48616	15.002	0.897879
O2.UC-4.scaffold1030_3	13932	7	4			0	0	0	1	0	0	0	0	0	0	0	0	0	0	0	0	0	0	0	0	0	0	0	0	0	0	0	0	0	0	0	0	0	0	0	0	0	0	0	0	0	0	0	0
O2.UC-4.scaffold10489_1	13102	3	3			0	1	1	35	0	0	0	0	0	0	1.57224	1.31257	0	0	0	0	0	0	0	0	0	1.27986	0	0	0	0	0	0	0	0	1.47737	0	0	0	0	0	1.91448	2.48867	1.51936	2.12467	0	0	1.88122	0
O2.UC-4.scaffold13796_2	39803	11	6			0	0	0	7	0	0	0	0	0	0	2.13058	0	0	0	0	0	0	0	0	0	0	0	0	0	0	0	0	0	0	0	0	1.5429	0	0.529305	0	0	0	0	0	0	0	0	0	0
O2.UC-4.scaffold21556_1	31416	3	3		Bacteroides_plebeius_DSM_17135	0	0	1	64	0	0	6.08862	2.77835	0	3.56835	25.8195	0	0.477366	0	0	5.12402	0	1.70157	0	3.97622	0	0	0	0	7.0761	3.00307	0	11.9449	0	0	22.2826	4.57383	0.977937	0	0	0	1.56543	15.6057	0	21.5685	0	3.42462	1.50539	21.4012
O2.UC-4.scaffold30519_1	59519	1	1			1	0	0	5	0	7.06899	0	0	0	0	0	0	0	0	0	0	0	0	0	0	0	0	0	0	0	0	0	0	0	0	0	0	0	0	0	0	0	0	0	0	0	0	0	0
O2.UC-4.scaffold31332_2	17191	1	1		Bacteroides_sp._4_3_47FAA	1	0	0	22	0	0	3.75409	0	0	1.22626	0	0	0	0	0	0	0	0	0	16.0278	8.26531	4.12531	0	0	0	0	0	0	0	0	7.31838	0	0	0	0	0	1.48192	0	0	0	2.51498	9.27467	0	0
O2.UC-4.scaffold35089_3	29082	1	1			0	0	0	1	0	0	0	0	0	0	0	0	0	0	0	0	0	0	0	0	0	0	0	0	0	0	0	0	0	0	0	0	0	0	0	0	0	0	0	0	0	0	0	0
O2.UC-4.scaffold4504_1	17699	27	23			0	0	0	43	1.41266	1.04491	2.36018	0	0	0.864733	2.09904	0	0	0	0	0	0.939256	0.509254	0	0	3.70051	0	0	0	7.0344	8.87697	3.28121	12.4098	0	1.62512	0	4.06207	0	0	0	0.913556	0	0	0	0	0	0	6.88456	0
unmapped_K23_L70.scaffold11912_15	10554	2	1			0	0	0	2	0	0	0	0	0	0	1.75844	0	0	0	0	0	0	0	0	0	0	0	0	0	0	0	0	0	0	0	0	0	0	0	0	0	0	0	0	0	0	0	0	0
V1.CD-1.scaffold14799_2	20227	1	1		Acidaminococcus_sp._D21	0	0	0	13	0	0	0	0	0	0	0	0	0	0	0	0	0	0	0	0	0	1.01257	0	0	0	0	0	0	0	0	0	0	0	0	0	0	0	0	0	0	0	0	0	0
V1.CD-1.scaffold16875_2	23197	8	7			0	0	0	23	0	1.36767	0.856338	0	0	0.151141	0	0	0	0	0.491669	0.433812	0	3.47703	0	0	0	0	0	2.65877	0	0	0	0	0	0	0	0	0	0	0.3573	0	0	0	0	0	0	0	0	0
V1.CD-1.scaffold1936_1	16059	2	2			0	0	0	9	0	1.6034	0	0	0	0	0	0	0	0	0	0.385582	0	0	0	0	0	0	0	0	0	0	0	0	0	0	0	0	0	0	0	0	0	0	0	0	0	0	0	0
V1.CD-1.scaffold2160_8	35445	68	40			0	0	0	1	0	0	0	0	0	0	0	0	0	0	0	0	0	0	0	0	0	0	0	0	0	0	0	0	0	0	0	0	0	0	0	0	0	0	0	0	0	0	0	0
V1.CD-1.scaffold22027_2	32729	12	9			0	0	0	4	0	0	0	0	0	0	0	0	0	0	0	0	0	0	0	0	0	0	0	0	0	0	0	0	0	0	0	0	0	0	0	2.94497	0	0	0	0	0	0	0	0
V1.CD-1.scaffold240_3	20391	15	14	Ruminococcus_sp._5_1_39BFAA_32503		0	0	0	4	0	0	0	0	0	0	0	0	0	0	0	0	0	0	0	0	0	0	0	0	0	0	0	0	0	0	0	0	0	0	0	0	0	0	0	0	1.6687	0	0	0
V1.CD-1.scaffold26204_5	10171	5	5			0	1	0	16	0	0	0	0	0	0	0	0	0	0	0	0	0	0	0	0	0	0	1.19718	0	0	0	0	0	0	0	0	0	0	0	0	0	0	0	0	0	0	0.757768	0	0
V1.CD-1.scaffold45234_1	26701	1	1			0	0	0	4	0	0	0	0	0	0	0	0	0	0	0	0	0	0	0	0	0	0	0	0	0	0	0	0	0	0	0	0	0	0	0	0	0	0	0	0	0	0	0	0
V1.CD-1.scaffold6384_1	10318	1	1		Acidaminococcus_sp._D21	0	0	0	2	0	0	0	0	0	0	0	0	0	0	0	0	0	0	0	0	0	0	0	0	0	0	0	0	0	0	0	0	0	0	0	0	0	0	0	0	0	0	0	0
V1.CD-1.scaffold7302_1	22830	2	2			0	0	0	10	0	0	0	0	0	0	0	0	0	0	0	0	0.699491	0	0	0	0	0	0	0	0	0	0	0	0	0	1.90252	1.43379	3.14253	2.97282	0	0	0	0	0	0	0	0	0	0
V1.CD-11.scaffold13156_4	21512	1	1			0	0	0	1	0	0	0	0	0	0	0	0	0	0	0	0	0	0	0	0	0	0	0	0	0	0	0	0	0	0	0	0	0	0	0	0	0	0	0	0	0	0	0	0
V1.CD-11.scaffold13598_3	17698	5	4			0	0	1	3	0	0	0	0	0	0	0	0	0	0	0	0	0	0	0	0	0	0	0	0	0	0	0	0	0	0	0	0	0	0	0	0	0	0	0	0	0	0	0	0
V1.CD-11.scaffold2236_8	17496	2	2			0	0	0	11	0	0	0.93303	0	0	0	0	0	0	0	0	0	2.88486	0	0	0.635121	0	0	0	0.609477	0	0	0	0	0	0	0	0.586365	0	0	0	0	0	0	0	0	0	0	0	0
V1.CD-11.scaffold29760_1	30194	4	4			0	0	0	10	0	0.610586	0	0	0	0	0	0	0	0	0	0	0	0	0	0	0	0	0	0	0	0	0	0.618168	0	0	0	0	0	0	0	0	0	0	0	0	0	0	0	0
V1.CD-11.scaffold38611_1	16931	2	2		Clostridium_sp._SS2/1	0	0	0	17	0	0	0	0	0	0.624593	0	0	0	0	0.622613	0	1.36498	0	0	0.551821	0	0	0	1.91589	0	0	0	0	2.15476	0	0	0	0	0	0	0	0	0	0	0	0	0	0	0
V1.CD-11.scaffold4149_5	10308	2	2			0	0	0	1	0	0	0	0	0	0	0	0	0	0	0	0	0	0	0	0	0	0	0	0	0	0	0	0	0	0	0	0	0	0	0	0	0	0	0	0	0	0	0	0
V1.CD-11.scaffold42319_5	14885	4	3			0	0	0	5	0	0	0	0	0	0	0	0	0	0	0	8.79078	0	0	0	0	0	0	0	0	0	0	0	0	0	0	0	0	0	0	0	0	0	0	0	0	0	0	0	0
V1.CD-11.scaffold4499_6	22106	1	1			0	0	1	1	0	0	0	0	0	0	0	0	0	0	0	0	0	0	0	0	0	0	0	0	0	0	0	0	0	0	0	0	0	0	0	0	0	0	0	0	0	0	0	0
V1.CD-11.scaffold552_17	11148	6	3		Bacteroides_ovatus_SD_CMC_3f	1	1	1	68	2.71742	0	6.44021	1.3579	0	0	17.4464	15.5992	2.41013	0	0.927094	0	4.82169	12.9232	22.8363	0	0	0	0	0	0	1.32226	2.4671	0	0	25.2686	13.5683	14.7854	0	1.1372	0	7.66025	0	0	0	0	22.2119	2.33603	11.6205	27.0123
V1.CD-11.scaffold552_19	31512	15	12		Bacteroides_sp._2_2_4	1	1	0	59	1.52756	0	5.13857	0	0	0	13.933	13.3319	2.31743	0	0.821372	0	3.73598	12.0071	22.3219	0	0	0	0	0	0	1.09388	0	0	0	0	10.7089	13.5874	0	1.28287	0	6.61937	0	0	0	0	10.7854	2.09466	10.6816	14.7565
V1.CD-11.scaffold56191_3	23767	27	10	Parabacteroides_merdae_ATCC_43184_18193		0	0	0	7	0	0	0	0	0	0	0	0	0	0	0	17.6887	0	0	0	0	0	0	0	0	0	0	0	0	0	0	0	0	0	0	0	0	0	0	0	0	0	0.732881	8.40519	0
V1.CD-11.scaffold59865_1	19162	2	1			1	0	0	6	0	0	0	0	0	5.06361	0	0	0	0	0	0	0	0	0	0	0	0	0	0	0	0	0	0	0	0	0	0	0	0	0	0	0	0	0	0	0	0	0	0
V1.CD-11.scaffold67_8	40352	19	14		Bacteroides_ovatus_SD_CMC_3f	0	0	0	28	0	0	0	0	0	0	0	0	0	0	0	0	0	1.04466	0	0	0	0	0	0	0	0	0	0	0	0	0	0	0	0	0	0	0	3.63146	0	0	2.79505	1.52528	0	6.3526
V1.CD-11.scaffold750_3	22646	1	1			0	0	0	1	0	0	0	0	0	0	0	0	0	0	0	0	0	0	0	0	0	0	0	0	0	0	0	0	0	0	0	0	0	0	0	0	0	0	0	0	0	0	0	0
V1.CD-11.scaffold766_1	32578	2	2		Eubacterium_hallii_DSM_3353	0	0	0	1	0	0	0	0	0	0	0	0	0	0	0	0	0	0	0	0	0	0	0	0	0	0	0	0	0	0	0	0	0	0	0	0	0	0	0	0	0	0	0	0
V1.CD-11.scaffold7912_3	15586	1	1			0	0	0	2	0	0	0	0	0	0	0	0	0	0	0	0	0	0	0	0	0	0	0	0	0	0	0	0	0	0	0	0	0	0	0	0	0	0	0	0	0	0	0	0
V1.CD-11.scaffold9648_3	41537	5	4			0	0	1	27	0	0.766893	0.480621	0	0	1.03491	0	0	0	0	0	0	0	0	0	0	0	0	0	0.462029	0	0	0	0	0	0	0	0	0	0	0	0	0	0	0	0	0	0	0	0
V1.CD-12.scaffold15316_2	10461	20	13			0	1	0	47	0	1.43245	0.874931	0	0	1.25611	0	0	1.84273	0	0	0	0	0.665971	0	0.646378	0	0	1.80154	0	1.99437	0	0	0	4.55812	1.30641	2.42453	3.95412	1.53917	0.562296	0	7.93685	0	0	0	0	0	0	0	0
V1.CD-12.scaffold16802_1	10188	2	2			0	0	0	17	0	0	0	0	0	0	0	0	0	1.10694	0	0	0	0	0	0	0	0	0	0	0	0	0	0	0	0	0	0	0	0	0	0	0	0	0	0	0	1.15928	0	0
V1.CD-12.scaffold32246_1	14977	1	1			0	0	0	1	0	0	0	0	0	0	0	0	0	0	0	0	0	0	0	0	0	0	0	0	0	0	0	0	0	0	0	0	0	0	0	0	0	0	0	0	0	0	0	0
V1.CD-12.scaffold35543_3	21408	1	1		Parabacteroides_merdae_ATCC_43184	1	0	0	17	0	0	0	0	0	0	0	0	0	0	0	0.378984	0	0	0	0	0	0	0	0	0	0	0	0	0	0	0	0	0	0	0	0	0	0	0	0	0	2.0967	0	1.55676
V1.CD-12.scaffold46164_1	10134	1	1			0	0	0	1	0	0	0	0	0	0	0	0	0	0	0	0	0	0	0	0	0	0	0	0	0	0	0	0	0	0	0	0	0	0	0	0	0	0	0	0	0	0	0	0
V1.CD-13.scaffold19581_1	16343	2	2			0	0	0	1	0	0	0	0	0	0	0	0	0	0	0	0	0	0	0	0	0	0	0	0	0	0	0	0	0	0	0	0	0	0	0	0	0	0	0	0	0	0	0	0
V1.CD-13.scaffold29817_5	13137	1	1			0	0	0	2	0	0	0	0	0	0	0	0	0	0	0	0	0	0	0	0	0	0	0	0	0	0	0	0	0	0.430869	0	0	0	0	0	0	0	0	0	0	0	0	0	0
V1.CD-13.scaffold31449_2	48567	1	1			1	0	0	6	0	0	0	0	0	0	0	0	0	0	0	0	0	0	0	0	0	0	0	0	0	0	0	0	0	0	0	0	0	0.580394	2.3116	0	0	0	0	0	0	0	0	0
V1.CD-13.scaffold34473_9	13589	1	1			0	0	0	8	0.658179	0	0	0	0	0	0	0	0	0	0	0	0	0	0	0	1.99164	0	0	0	0	0	0	0	0	0	0	0	0	0	1.74752	0	0	0	0	0.554282	0	0	0	0
V1.CD-13.scaffold36743_2	33968	14	8			0	1	0	48	1.55978	1.20561	0	2.02944	4.15842	5.45573	0	0	0	0	4.53844	2.55172	2.05042	0	0	0	0	0	0	0	0	6.8795	0	3.95544	6.35926	1.28202	0	0	0	3.86554	0	0	0	1.59151	2.40957	0	2.39931	0.528491	0	0
V1.CD-13.scaffold42376_2	41751	1	1			0	0	0	2	0	0	0	0	0	0	0	0	0	0	0	0	0	0	0	0	0	0	0	0	0	0	0	0	0	0	0	0	0	0	0	0	0	0	0	0	0	0	0	0
V1.CD-13.scaffold52007_1	13326	2	2		Roseburia_intestinalis_L1-82	0	0	0	1	0	0	0	0	0	0	0	0	0	0	0	0	0	0	0	0	0	0	0	0	0	0	0	0	0	0	0	0	0	0	0	0	0	0	0	0	0	0	0	0
V1.CD-13.scaffold7794_1	16904	4	4			0	0	0	8	0	0	0	0	0	0	0	0	0	0	0	0.564106	0	0	0	0	0	0	0	0	0	0	0	0	0	0	0	0	0	0	0	0	0	0	1.01331	1.63602	0	0	0	0
V1.CD-13.scaffold78038_1	31393	6	4			0	0	0	23	0	0	0	14.8568	0	0	0	0	0.9459	0	0	2.91678	0	0	0	0	0	0	0	0	0	1.16697	0	1.40925	1.55776	0	0	0.673713	0	4.32451	0	0	0	0.944372	0	0	0.548279	0.530619	0	0
V1.CD-13.scaffold99945_1	27808	2	2			0	0	0	4	0	0	0	0	0	0	0	0	0	0	0	0	0	0	0	0	3.47669	0	6.4191	0	0	0	0	0	0	0	0	0	0	0	0	0	0	0	0	0	0	0	0	0
V1.CD-14.scaffold15156_1	18761	16	16	Bacteroides_sp._4_3_47FAA_32443	Bacteroides_sp._3_1_33FAA	0	0	0	7	0	0	0	0	0	0	0	0	0	0	0	0	0	0	4.03121	0	0	0	0	0	0	0	0	0	0	0	0	0	0	0	0	0	0	0	0	0	0.74508	9.46824	0	0
V1.CD-14.scaffold1847_1	10392	1	1			1	1	0	43	0	6.65389	0	4.66891	1.22494	6.03856	0	0	2.44728	1.60075	0	1.98177	2.9565	0.606582	0	0	0	0	0	0	0	3.71743	0	0	0	0	0	0	7.38212	1.1308	0	1.89412	0	0.766633	0	0	0	1.00852	6.74709	0
V1.CD-14.scaffold21213_3	19592	1	1			0	0	0	29	0	0.477178	0	0	0	0.660317	0.938889	0	0	3.78883	0	0	0	0	0	0	0	0	0	1.163	0	0	0	0	0.64037	0	0	0.525449	0	0	0	0	0	0	12.1328	0	0	0	1.28634	0
V1.CD-14.scaffold33198_1	14830	2	2			0	0	0	2	0	0	0	0	0	0	0	0	0	0	0	0	0	0	0	0	0	0	0	0	0	0	0	0	0	0	0	0	0	0	0	0	0	0	0	0	0	0	0	0
V1.CD-14.scaffold3435_1	10700	1	1			0	0	0	5	0	0	0	0	0	2.86538	0	0	0	0	0	0	0	0	0	0	0	0	0	0	0	0	0	0	0	0	0	0	0	0	0	0	0	0	0	0	0	0	0	0
V1.CD-14.scaffold35852_2	20458	16	10		Eubacterium_siraeum_DSM_15702	0	0	0	3	0	0	0	0	0	0	0	0	0	0	0	0	0	0	0	0	0	0	0	0	0	0	0	0	0	0	0	0	0	0	0	0	0	0	0	0	10.7451	0	0	0
V1.CD-14.scaffold45276_5	44740	16	14			0	1	0	15	0	0	0	0	0	0	0	0	0	0	0	0	32.5372	0	0	0	0	0	0	6.52069	0	0	0	0	0	0	0	2.3111	0	0	0	0	0	0.709495	0	0	0	0	0	0
V1.CD-14.scaffold4806_1	11911	10	8			1	1	0	92	2.07451	1.62716	0	1.36388	2.81239	9.52805	16.5593	0	8.25484	9.27297	2.06951	12.911	8.21537	8.481	0	0.681742	8.28066	3.28633	4.20319	1.70392	0	3.77108	11.3254	0.753917	1.29578	0	1.90895	1.38316	6.30292	4.14795	1.49362	1.14592	0	1.63874	1.25297	0	2.76852	0	6.07309	2.2396
V1.CD-14.scaffold57201_10	21086	1	1			0	0	0	23	2.44558	0	0	0	0	1.31335	1.192	0	0.524042	0	0	0	0	0	0	0	0	0	0	0	0	0	0	0.514989	0	0	0	1.67444	0	0	0	0	0	0	0	0	0	0	0	0
V1.CD-14.scaffold86860_3	23015	2	2		Bacteroides_sp._4_3_47FAA	0	0	0	26	0.711854	0	0	0	0	1.79047	0	0	0	18.855	0	0	0	3.02983	0	0	0	0	0	0	0	0	0	0	4.33585	1.88079	0	0	0	0	1.41066	7.36057	0	0	1.45406	0	2.67361	13.9223	0	0
V1.CD-14.scaffold95730_2	19692	1	1		Eubacterium_siraeum_DSM_15702	0	0	0	4	0	0	0	0	0	0	0	0	0	0	0	0	0	0	0	0	0	0	0	0	0	0	0	0	0	0	0	0	0	0	0	0	0	0	0	0	0	0	0	0
V1.CD-15.scaffold13246_1	10243	1	1			0	0	0	1	0	0	0	0	0	0	0	0	0	0	0	0	0	0	0	0	0	0	0	0	0	0	0	0	0	0	0	0	0	0	0	0	0	0	0	0	0	0	0	0
V1.CD-15.scaffold16275_1	42368	3	1		Bacteroides_coprocola_DSM_17136	1	0	0	9	0	0	30.8593	0	0	0	0	0	0	0	0	0	0	0	0	0	0	0	0	0	0	0	0	0	0	0	0	0	0	3.87884	0	0	0	0	0	0	0	3.83284	0	0
V1.CD-15.scaffold1750_1	22445	5	4			1	0	0	3	0	0	0	0	0	0	0	0	0	0	0	0	0	0	0	0.984673	0	0	0	0	0	0	0	0	0	0	0	0	0	0	0	0	0	5.07158	0	0	0	0	0	0
V1.CD-15.scaffold21233_1	39441	2	1		Parabacteroides_sp._D13	1	0	0	93	0	1.11728	2.16864	1.88802	0	1.20054	0.804529	1.82468	1.00884	2.25189	1.82111	1.34364	6.57367	1.61059	0	2.79673	1.83664	1.75288	4.67397	10.7569	3.63281	1.38197	0	5.29234	3.71624	0	0	3.2121	0	0.682547	0.97407	1.13984	0.529977	1.72924	0	0	4.7238	3.27714	0	1.88134
V1.CD-15.scaffold21705_1	12800	8	7			0	0	0	1	0	0	0	0	0	0	0	0	0	0	0	0	0	0	0	0	0	0	0	0	0	0	0	0	0	0	0	0	0	0	0	0	0	0	0	0	0	0	0	0
V1.CD-15.scaffold235_2	39719	52	23			0	0	0	10	0	0	0	0	0	0	2.0247	0	0	0	0	0	0	0	0	0.443896	0	0	3.34965	0	0	0	0	0	0	0	0	0	0	0	0	0	0	0	0	0	0	0	0	0
V1.CD-15.scaffold23874_2	12221	1	1			1	0	0	2	0	0	0	0	0	0	0	0	0	0	0	0	0	0	0	0.743375	0	0	0	0	0	0	0	0	0	0	0	0	0	0	0	0	0	0	0	0	0	0	0	0
V1.CD-15.scaffold248_1	12971	1	1			1	1	0	3	0	0	0	0	0	0	0	0	0	0	0	0	0	0	0	1.01814	0	0	0	0	0	0	0	0	0	0	0	0	0	0	0	0	0	5.2457	0	0	0	0	0	0
V1.CD-15.scaffold43689_1	12818	1	1			0	0	1	4	0	0	0	0	0	0	0	0	0	0	0	0	0	0	0	0	0	0	0	0	0	0	0	0	0	0	0	0	0	0	0	1.65183	0	0	0	0	0	0	0	0
V1.CD-15.scaffold6320_2	39754	8	7		Bacteroides_finegoldii_DSM_17565	0	1	1	86	0	0	26.2519	0	0	0	4.8067	4.45514	2.1124	23.502	8.58928	2.32729	11.6079	0	0	0	18.7149	4.22802	0	0	0	0	0	19.1289	3.28868	4.90474	9.47373	1.32707	0	0	1.51221	6.81191	9.19702	4.26833	5.76973	0	29.7338	6.44759	0	45.7544
V1.CD-3.scaffold10648_4	19854	45	27			0	1	1	58	0	1.84651	1.23435	0	0	1.32078	0	0	2.12081	0	0.982595	0	0	0.716254	0	1.01544	0	0	1.82268	0	1.97806	0	0	0	6.80872	1.82384	3.41039	4.71355	1.68706	0	0	8.2303	0	3.01386	0.726929	1.09879	0	0	0	14.5232
V1.CD-3.scaffold12934_1	25080	16	14		Bacteroides_coprocola_DSM_17136	0	1	0	44	0	0	0	0	0	0	0	0	0	23.5998	0	0	0	0	0	0	5.56034	7.91814	0	0	0	0	0	0	0	0	16.2623	5.04652	0	0	0	0	0	0	0	6.26179	8.12029	4.23548	15.1266	0
V1.CD-3.scaffold16967_2	42452	1	1			0	0	0	1	0	0	0	0	0	0	0	0	0	0	0	0	0	0	0	0	0	0	0	0	0	0	0	0	0	0	0	0	0	0	0	0	0	0	0	0	0	0	0	0
V1.CD-3.scaffold25657_1	31866	4	4			0	0	0	4	0	0	0	0	0	0	0	0	0	0	0	0	0	0	0	0	0	0	0	0	0	0	0	0	0	0	1.89112	0	0	0	0	0	0	0	0	0	0	0	0	0
V1.CD-3.scaffold2617_3	10674	8	7		Dorea_formicigenerans_ATCC_27755	0	0	0	3	0	0	0	0	0	0	0	0	0	0	0	0	0	0	0	0	0	0	0	0	0	0	0	0	0	0	0	0	0	0	0	0	0	0	0	0	0	0	0	0
V1.CD-3.scaffold26311_3	19794	6	6			0	0	0	2	0	0	0	0	0	0	0	0	0	0	0	0	0	0	0	0	0	0	0	0	0	0	0	0	0	0	0	0	0	0	0	0	0	0	0	0	0	0	0	0
V1.CD-3.scaffold2667_1	12112	9	8			0	0	0	1	0	0	0	0	0	0	0	0	0	0	0	0	0	0	0	0	0	0	0	0	0	0	0	0	0	0	0	0	0	0	0	0	0	0	0	0	0	0	0	0
V1.CD-3.scaffold26799_2	12871	2	2			0	0	0	8	0	0	0	0	0	0	0	0	0	0	0.548905	0	0	0	0	0	0	0	0	0	0	0	0	0	0	0	0	0	0	0	0.856037	0	0	0	0	0	0	0	0	0
V1.CD-3.scaffold41468_1	18546	24	18			0	0	0	2	0	0	0	0	0	0	0	0	0	0	0	0	0	0	0	0	0	0	0	0	0	0	0	0	0	0	0	0	0	0	0	0	0	0	0	0	0	0	0	0
V1.CD-3.scaffold42804_3	19400	28	22			0	0	0	3	0	0	0	0	0	0	0	0	0	0	0	0	0	0	0	0	0	0	0	0	0	0	0	0	0	0	0	0	0	0	0	0	0	0	0	0	0	0	0	0
V1.CD-3.scaffold43305_3	102030	6	4			0	0	0	2	0	0	0	0	0	0	0	0	0	0	0	0	0	0	0	0	0	0	0	0	0	0	0	0	0	0	0	0	0	0	0	0	0	0	0	0	0	0	0	0
V1.CD-3.scaffold4503_4	23037	1	1			0	0	0	2	0	0	0	0	0	0	0	0	0	0	0	0	0	0	0	0	0	0	0	0	0	0	0	0	0	0	0	0	0	0	0	0	0	0	0	0	0	0	0	0
V1.CD-3.scaffold5188_1	27468	5	4			0	0	0	5	0	0	0	0	0	0	0	0	0	0	0	0	0	0	0	0	0	0	0	0	0	0	0	0	0	0	1.88894	0	0	0	0	0	0	0	0	0	0	0	0	0
V1.CD-3.scaffold55576_1	13198	1	1			0	0	0	4	0	0	0	0	0	0	0	0	0	0	0	0	0	0	0	0	0	0	0	0	0	0	0	0	0	0	0.989852	0	0	0	0	0	0	0	0	0	0	0	0	0
V1.CD-3.scaffold63950_3	48853	1	1			0	0	0	2	0	0	0	0	0	0	0	0	0	0	0	0	0	0	0	0	0	0	0	0	0	0	0	0	0	0	0	0	0	0	0	0	0	0	0	0	0	0	0	0
V1.CD-3.scaffold6439_1	47552	7	7			0	0	0	1	0	0	0	0	0	0	0	0	0	0	0	0	0	0	0	0	0	0	0	0	0	0	0	0	0	0	0	0	0	0	0	0	0	0	0	0	0	0	0	0
V1.CD-3.scaffold7292_3	31761	3	3	Parabacteroides_sp._D13_38359	Bacteroides_sp._3_1_33FAA	0	0	1	9	0	0	0	0	0	1.05487	0	0	0	0	0	0	0	0	0	0	0	0	0	0	0	0	0	0	0	0	0	0	0	0	0	0	0	0	0	0	0	0	0	0
V1.CD-4.scaffold5516_2	14037	12	11			0	1	0	67	0	2.61834	1.26477	0.902397	0	1.61058	0	0	2.47394	0	2.0284	0	0	1.18621	0	0	0	0	2.5336	0	2.26352	0	0	0	6.20408	2.39208	3.6967	5.68833	2.46889	0.842144	0.998619	10.4312	0	6.64677	1.0104	1.14675	0.619814	0	0	17.1655
V1.CD-4.scaffold57821_1	18677	1	1			0	0	0	11	0	1.5854	0	0	0	0	0	0	0	0	2.39886	0	0	0	0	0	0	0	0	0	0	0	0	0	6.70432	0	0	0	0	0	0	0	0	0	0	0	0	6.60755	0	0
V1.CD-4.scaffold70383_4	22564	23	17			0	0	0	3	0	0	0	0	0	0	0	0	0	0	0	0	0	0	0	0	0	0	0	0	0	0	0	0	0	0	0	0	0	0	0	0	0	0	0	0	0	0	0	0
V1.CD-4.scaffold80691_1	11536	2	2			0	0	0	1	0	0	0	0	0	0	0	0	0	0	0	0	0	0	0	0	0	0	0	0	0	0	0	0	0	0	0	0	0	0	0	0	0	0	0	0	0	0	0	0
V1.CD-4.scaffold92930_1	23192	3	3			0	0	0	10	0	0	0	0	0	0.264898	0	0	0	0	0	0	0	0	0	0.803077	0	0	0	0	1.65862	0	0	0	0	0	0	0	0	0	0	0	0	0	0	0.871786	0	0.65917	0	0
V1.CD-6.scaffold13341_2	12109	12	8			0	0	1	2	0	0	0	0	0	0	0	0	0	0	0	0	0	0	0	1.19433	0	0	0	0	0	0	0	0	0	0	0	0	0	0	0	0	0	0	0	0	0	0	0	0
V1.CD-6.scaffold13611_3	14692	7	7			0	1	0	43	2.67098	0	9.29815	0	0	0	0	0	0	0	0	1.28538	0	2.47869	4.43707	0	10.0978	0	3.15857	0	0	0	0	0	0	0	3.47192	0	0	0	2.39672	0	0	0	2.55086	0	0.782852	0	1.21776	0
V1.CD-6.scaffold42435_2	10168	13	8			0	0	0	13	0	0	0	0	0	0	0	0	0	0	0	0	0	0	8.35066	0	0	0	0	0	0	0	0	0	0	0	0	2.90716	0	0	0	0	0	0	0	0	1.9756	2.9672	0	10.632
V1.CD-6.scaffold52836_1	25869	11	8			0	0	0	4	0	0	0	0	0	0	0	0	0	0	0	0	0	0	0	0	0	0	0	0	0	0	0	0	0	0	0	0	0	0	0	0	0	0	7.65016	0	0	0	0	0
V1.CD-6.scaffold52836_2	24364	1	1			0	0	0	4	0	0	0	0	0	0	0	0	0	0	0	0	0	0	0	0	0	0	0	0	0	0	0	0	0	0	0	0	0	0	0	0	0	0	5.24417	0	0	0	0	0
V1.CD-6.scaffold55584_4	20174	7	6			0	0	0	5	0	0	0	0	0	0	0	0	1.25472	0	0	0	0	1.01348	0	0	0	0	0	0	0	0	0	0	0	0	2.53271	0	0	0	0	0	0	0	0	0	0	0	0	0
V1.CD-6.scaffold75958_3	15811	9	7			0	0	0	3	0	0	0	0	0	0	0	0	0	0	0	0	0	0	0	0	0	0	0	0	0	0	0	0	0	0	0	0	0	0	0	0	0	0	0	0	0	0	0	0
V1.CD-8.scaffold111064_3	13190	27	15			0	0	0	3	0	0	10.5587	0	0	0	0	0	0	0	0	0	0	0	0	0	0	0	0	0	0	0	0	0	0	0	0	0	0	0	0	0	0	0	0	0	0	0	0	0
V1.CD-8.scaffold119570_1	16907	2	1		Methanobrevibacter_smithii_DSM_2375	0	0	0	2	0	0	0	0	0	0	0	0	0	0	0	0	0	0	0	0	0	0	0	0	0	0	0	0	0	0	0	0	0	0	0	0	0	0	0	0	0	0	0	0
V1.CD-8.scaffold2195_1	41017	8	5			0	0	0	8	0	0	0	0	0	0	0	0	0	0	0	0	0	3.99425	2.90027	0	0	0	0	0	0	0	0	0	0	0	2.17701	0	0	0	0	0	0	0	0	0	0	0	0	0
V1.CD-8.scaffold27898_2	11467	3	1			0	0	0	1	0	0	0	0	0	0	0	0	0	0	0	0	0	0	0	0	0	0	0	0	0	0	0	0	0	0	0	0	0	0	0	0	0	0	0	0	0	0	0	0
V1.CD-8.scaffold35434_2	35062	14	12			0	0	0	3	0	0	0	0	0	0.426104	0	0	0	0	0	0	0	0	0	0	0	0	0	0	0	0	0	0	0	0	0	0	0	0	0	0	0	0	0	0	0	0	0	0
V1.CD-8.scaffold37174_1	25211	6	6			0	0	0	2	0	0	0	0	0	0	0	0	0	0	0	0	0	0	0	0	0	0	0	0	0	0	0	0	0	0	0	0	0	0	0	0	0	0	0	0	0	0	0	0
V1.CD-8.scaffold4416_2	18299	3	2			0	0	0	1	0	0	0	0	0	0	0	0	0	0	0	0	0	0	0	0	0	0	0	0	0	0	0	0	0	0	0	0	0	0	0	0	0	0	0	0	0	0	0	0
V1.CD-8.scaffold4416_3	11605	1	1			0	0	0	1	0	0	0	0	0	0	0	0	0	0	0	0	0	0	0	0	0	0	0	0	0	0	0	0	0	0	0	0	0	0	0	0	0	0	0	0	0	0	0	0
V1.CD-8.scaffold54441_1	11203	1	1			0	0	0	25	0	0	7.22371	2.25022	0	0	0	0	0	0	0	0.791579	1.34796	0.877019	0	1.08129	0	0	2.30123	0	0	0	1.34227	4.67826	1.11436	0	2.3525	0	0	0	0	0	0	1.49697	0	0	0	0	0	0
V1.CD-8.scaffold87696_1	13396	9	5			0	0	0	14	0	0	0	2.46066	0	0	0	0	0.367811	0	0	0	1.33818	0.827321	0	0	0	0	21.2453	0	0	0	0	0	2.83377	0	2.6334	0	0	0	0	0	0	0	0	0	0	0	0	0
V1.CD-8.scaffold98938_1	11706	10	7			1	1	0	95	2.34947	1.35795	0.678686	1.21058	2.87023	8.91854	18.4081	0	8.98521	9.91925	2.45417	10.9016	9.03026	9.05738	0	0.664908	9.0338	4.1823	3.7994	2.52151	0	3.36666	11.931	0.834242	1.69513	0	1.55038	1.65537	7.97229	5.18008	1.41512	1.21546	0	1.91232	1.7621	0	2.84635	0	6.01633	2.66702
V1.CD-9.scaffold11986_1	34711	1	1			0	0	0	12	0	0	0	0	0	0	2.96709	0	0	0	0	0	0	0	0	0	0	0	0	0	0	0	0	0	0	4.13977	0	0	0	1.54653	0	0	0	0	0	0	0	0	2.26028	0
V1.CD-9.scaffold14193_1	40822	3	3	Acidaminococcus_sp._D21_34117	Acidaminococcus_sp._D21	0	0	0	1	0	0	0	0	0	0	0	0	0	0	0	0	0	0	0	0	0	0	0	0	0	0	0	0	0	0	0	0	0	0	0	0	0	0	0	0	0	0	0	0
V1.CD-9.scaffold14343_2	31503	6	5			0	0	0	7	0	0	0	0	0	0	0	0	0	0	0	0	0	0	0	0	0	0	0	0	0.757252	0	0	0	0	0	0	0	0	0	0	0	0	0	0	0	0	0	0	0
V1.CD-9.scaffold16766_5	69854	7	7			0	0	0	3	0	0	0	0	0	0	0	0	0	0	0	0	0	0	0	0	0	0	0	0	0	0	0	0	0	0	0	0	0	0	0	0	0	0	0	0	0	0	0	0
V1.CD-9.scaffold18211_2	25530	1	1		Acidaminococcus_sp._D21	0	0	0	13	0	0	0	0	0	0	0	0	0	0	0	0	0	0	0	0	0	0.959527	0	0	0	0	0	0	0	0	0	0	0	0	0	0	0	0	0	0	0	0	0	0
V1.CD-9.scaffold2683_7	14837	1	1			0	0	0	3	0	0	0	0	0	0	0	0	0	0	0	0	0	0	0	0	0	0	0	0	0	0	0	0	0	0	0	0	0	0	0	0	0	0	0	0	0	0	0	0
V1.CD-9.scaffold3062_3	46381	9	4			0	0	0	1	0	0	0	0	0	0	0	0	0	0	0	0	0	0	0	0	0	0	0	0	0	0	0	0	0	0	0	0	0	0	0	0	0	0	0	0	0	0	0	0
V1.CD-9.scaffold57847_1	32957	9	8			1	0	0	4	0	0	0	0	0	0	0	0	0	0	0	0	0	0	0	8.15555	0	0	0	0	0	0	0	0	0	0	4.07658	0	0	0	0	0	0	0	0	0	0	0	0	0
V1.CD-9.scaffold57847_2	16878	6	4			1	0	1	1	0	0	0	0	0	0	0	0	0	0	0	0	0	0	0	0	0	0	0	0	0	0	0	0	0	0	0	0	0	0	0	0	0	0	0	0	0	0	0	0
V1.CD-9.scaffold57847_3	28891	3	3			1	1	0	2	0	0	0	0	0	0	0	0	0	0	0	0	0	0	0	0	0	0	0	0	0	0	0	0	0	0	0	9.42044	0	0	0	0	0	0	0	0	0	0	0	0
V1.CD-9.scaffold64895_1	30270	1	1			0	0	0	9	0	0	0	0	0	0	17.6647	0	0	0	0	0	0	0	0	0	0	0	0	0	0	0	0	0	0	0	0	0	0.720214	2.01748	0	0	0	0	0	0	0	0	0	0
V1.CD-9.scaffold75967_2	18464	26	15			0	1	0	14	0	0	0	0	0	0	0	0	0	0	0	0	0	0	17.342	0	0	0	0	0	0	0	0	0	0	0	0	3.73073	0	0	0	0	0	0	0	5.69371	0	2.54338	0	0
V1.CD-9.scaffold77327_1	16416	2	2		Alistipes_putredinis_DSM_17216	0	0	0	29	0	5.39939	0	0	0	0	0	0	0	0	0	0	4.00798	0	0	0	0	0	0	0	0	0	0	0	0	0	2.85441	4.03689	0	0	4.73453	0	0	0	0	0	0	0	5.55595	0
V1.UC-10.scaffold10347_2	19432	1	1			1	0	1	8	0	0	0	0	0	0	0	0	0	0	0	0	0	0	0	0	0	0	0	0	0	0	0	0	0	0	0	0	0	0	0	0	0	0	0	0	0	1.01417	0	0
V1.UC-10.scaffold1445_7	12926	11	10			0	1	0	40	0	0	1.19983	0	0	0	0	0	0	0	0	0	0	0	0	0	0	0	0	8.85198	0	0	0	0	0	0	16.0541	5.50993	1.08044	0	0	0	6.02287	0	0	8.63347	0	0	22.5502	0
V1.UC-10.scaffold18635_2	14418	3	3			0	0	0	3	0	0	0	0	0	0	0	0	0	0	0	0	0	0	0	0	4.66579	0	0	0	0	0	0	0	0	0	0	0	0	0	0	0	0	0	0	0	0	0	0	0
V1.UC-10.scaffold18661_4	12898	17	11			0	0	0	1	0	0	0	0	0	0	0	0	0	0	0	0	0	0	0	0	0	0	0	0	0	0	0	0	0	0	0	0	0	0	0	0	0	0	0	0	0	0	0	0
V1.UC-10.scaffold2653_1	10791	18	9			0	0	0	5	0	0	0	0	0	0	0	0	0	1.83429	0	0	0	0	0	0	0	0	0	0	0	0	0	0	0	0	0	0	0	0	0	0	0	0	0	0	0	0	0	0
V1.UC-10.scaffold27183_3	26548	3	3			0	0	0	6	0	0	0	0	0	0	0	0	0	0	0	0	0	0	0	0	0	0	0	0	0	0	0	0	0	0	0	0	0	0	0	0	0	0	1.25868	0	0	0	0	0
V1.UC-10.scaffold27570_5	12659	36	11			1	1	0	90	2.35145	2.89342	0	8.36453	6.32202	13.8333	29.4158	0	5.00793	0	1.32707	18.5074	7.40377	3.35194	4.53435	3.0611	10.9356	0	3.15036	0	15.9803	30.7807	13.3441	2.10141	2.34126	5.53529	3.73645	18.323	70.2518	15.083	3.32966	2.5384	0.774766	26.5359	5.09117	0.544661	7.79874	1.30131	12.1806	1.12686
V1.UC-10.scaffold30222_3	36332	6	6			0	0	0	13	0	0	0	0	1.18266	0	0	0	6.85353	0	0	0	0	0	0	0	0	0	0	0	0	3.00906	0	0	0	0	0	0	0	7.652	0	0	0	0	0	0	0	0	5.47635	0
V1.UC-10.scaffold3416_3	11121	23	11		Dialister_invisus_DSM_15470	0	0	0	1	0	0	0	0	0	0	0	0	0	0	0	0	0	0	0	0	0	0	0	0	0	0	0	0	0	0	0	0	0	0	0	0	0	0	0	0	0	0	0	0
V1.UC-10.scaffold36768_1	12579	3	3			1	0	0	2	0	0	0	0	0	0	0	0	0	0	0	0	0	0	0	0	0	0	0	0	0	0	0	0	0	0	0	0	0	0	0	0	0	0	0	0	0	0	0	0
V1.UC-10.scaffold36768_2	18743	31	23			0	0	0	3	0	0	0	0	0	0	0	0	0	0	0	0	0	0	0	0	0	0	0	0	0	0	0	0	0	0	0	0	0	0	0	0	0	0	0	0	0	0	0	0
V1.UC-10.scaffold41553_2	17833	15	9			0	0	0	1	0	0	0	0	0	0	0	0	0	0	0	0	0	0	0	0	0	0	0	0	0	0	0	0	0	0	0	0	0	0	0	0	0	0	0	0	0	0	0	0
V1.UC-10.scaffold5305_5	12727	17	8			0	1	0	10	0	0	0	0	0	0	0	0	0	2.89874	0	0	0	0	0	0	0	0	0	0.547102	0	0	0	0	0	1.19025	0	0	0	0	0	0.846704	0	0	0	0	0	0	0	0
V1.UC-10.scaffold62569_3	26426	2	1			0	1	0	4	0	0	0	0	0	0	3.0889	0	0	0	0	0	0	0	0	0	0	0	0	0	0	0	0	0	0	0	0	0	0	0	0	0	0	0	0	0	0	0	0	0
V1.UC-10.scaffold62569_7	16022	1	1			0	1	0	1	0	0	0	0	0	0	0	0	0	0	0	0	0	0	0	0	0	0	0	0	0	0	0	0	0	0	0	0	0	0	0	0	0	0	0	0	0	0	0	0
V1.UC-10.scaffold77653_2	49095	1	1			1	0	0	6	0	8.81871	0	0	0	0	0	0	0	0	0	0	0	0	0	0	0	0	0	0	0	0	0	0	0	0	0	0	0	0	0	0	0	0	0	0	0	1.52075	0	0
V1.UC-10.scaffold8015_1	17928	93	26			0	0	0	2	0	0	0	0	0	0	0	3.7928	0	0	0	0	0	0	0	0	0	0	0	0	0	0	0	0	0	0	0	0	0	0	0	0	0	0	0	0	0	0	0	0
V1.UC-10.scaffold8350_1	10568	64	20			0	0	0	3	0	0	0	0	0	0	0	0	0	2.36148	0	0	0	0	0	0	0	0	0	0	0	0	0	0	0	0	0	0	0	0	0	0	0	0	0	0	0	0	0	0
V1.UC-10.scaffold846_26	10635	8	4			0	0	0	5	0	0	0	0	0	0.964334	0	0	0	0	0	0	0	0	0	0	0	0	0	0	0	0	0	0	0	0	0	0	0	0	0	0	0	0	0	0	0	0	0	0
V1.UC-10.scaffold92009_1	33331	9	8			0	0	0	4	0	0	0	0	0	0	0	0	0	0	0	0	0	0	0	0	0	0	0	0	0	0	0	0	0	0	0	0	0	0	0	0	0	0	0	0	0	0	0	0
V1.UC-10.scaffold99284_1	10233	2	2			0	0	0	1	0	0	0	0	0	0	0	0	0	0	0	0	0	0	0	0	0	0	0	0	0	0	0	0	0	0	0	0	0	0	0	0	0	0	0	0	0	0	0	0
V1.UC-13.scaffold18316_3	61387	14	10			0	0	0	12	0	0	0	0	0	0.27847	0	0	0	0	0	0	0	0	1.39644	0	0	0	0	0	0	0	0	0	0	0	0	1.18293	0	0	0	0	0	0	0	0	0	0	0	0
V1.UC-13.scaffold18715_1	56549	3	3		Bacteroides_sp._3_2_5	0	0	0	7	0	0	0	3.0275	0	0	0	0	0	0	0	0	0	0.743129	0	0	0	0	0	0	0	0	0	0	1.1965	0	0	0	0	0	0	0	0	0	0	0	0	0	0	0
V1.UC-13.scaffold27728_2	25470	2	2			1	0	0	1	0	0	0	0	0	0	0	0	0	0	0	0	0	0	0	0	0	0	0	0	0	0	0	0	0	0	0	0	0	0	0	0	0	0	0	0	0	0	0	0
V1.UC-13.scaffold27937_1	32629	16	13			0	0	0	2	0	0	0	0	0	0	0	0	0	0	0	0	0	0	0	0	0	0	0	0	0	0	0	0	0	0	0	0	0	0	0	0	0	0	0	0	0	0	0	0
V1.UC-13.scaffold50783_1	38233	12	9			0	0	0	20	0	0	0	0	0	0	6.56065	0	0	0	0	0.398761	0	0	0	0	0	0	0	0	0	0	0	0	1.4672	0	1.93868	0	0	0	0	0	0.644791	0	0	9.89645	0	0	0	22.7395
V1.UC-13.scaffold5882_7	27541	2	2			0	0	0	7	0	0	4.00306	0	0	0	0	0	0	0	0	0.739013	0	0	0	0	0	0	0	0	0	0	0	0	0	0	0	0	0	0	0	0	0	0	7.32327	0	0	0	0	0
V1.UC-13.scaffold64315_4	29569	1	1		Ruminococcus_obeum_ATCC_29174	0	0	0	4	0	0	0	0	0	0	0	0	0	0	0	0	0	0	0	0	0	0	0	0	0	0	0	0	0	0	0	0	0	0	0	0	0	0	0	0	0	0	0	0
V1.UC-13.scaffold65827_1	19853	1	1		Ruminococcus_obeum_ATCC_29174	0	0	0	7	0	0	0	0	0	0	0	0	0	0	3.00395	0	0	0	0	0	0	0	0	0	0	0	0	0	0	0	0	0	0	0	0	0	0	0	0	0	0	0	0	0
V1.UC-13.scaffold68408_2	11733	3	1			1	1	0	4	0	0	0	0	0	0	0	0	0	0	0	0	0	0	0	0	0	0	0	0	0	0	0	0	0	0	0	2.42594	0	0	0	0	0	0	0	0	0	0	0	0
V1.UC-13.scaffold7701_1	23064	2	2			0	0	0	5	0	0	0	0	0	0.549611	0	0	0	0	0	0	0	0	0	0	0	0	0	0	0	0	0	0	0	0	0	0	0	0	0	0	0	0	0	0	0	0	0	0
V1.UC-14.scaffold13017_6	13122	1	1			0	0	0	6	1.10521	0	0	0	0	0	0	0	0	0	0	0	0	0	0	0	0	0	0	0	0	0	0	0	0	0	0	0	0	0	0	0	1.15911	0	0	0	0	0	0	0
V1.UC-14.scaffold17066_10	52029	8	6		Bacteroides_stercoris_ATCC_43183	1	1	0	32	1.58023	0	32.4138	4.47289	3.33835	0	0	0	1.44882	0	0	0	0	0	0	4.33956	14.7502	0	0	4.38287	0	0	0	0	18.317	1.30156	0	17.6244	0	0	0	0	0	0	0	0	0	0	13.902	6.48381
V1.UC-14.scaffold18033_3	10346	1	1			0	0	1	6	0	0	0	22.4217	0	0	0	0	0	0	0	0	0	0	0	0	0	0	0	0	0	0	0	0	0	0	0	0	0	12.7182	0	0	0	0	0	0	0	0	0	0
V1.UC-14.scaffold18565_6	39234	28	13		Bacteroides_sp._2_2_4	1	1	0	67	2.59858	0	5.8853	1.33857	0	0	13.4924	16.3686	0.911702	0	1.04283	0	4.8816	13.6579	22.2989	0	0	0	0	0	0	1.35258	2.56516	0	0	24.1851	13.4916	16.8374	0	1.29829	0	8.04806	0	0	0	0	8.52569	2.20615	13.2051	30.7281
V1.UC-14.scaffold20889_10	32062	11	10			0	0	0	2	0	0	0	0	0	0	0	0	0	0	0	0	0	0	0	0	0	0	0	0	0	0	0	0	0	0	0	0	0	0	0	0	0	0	0	0	0	0	0	0
V1.UC-14.scaffold20889_9	33197	5	5			0	0	0	10	0	0	0	0	0	0	0	0	11.5133	0	0	0	0	0	0	0	0	0	0	0	0	0	0	0	0	0	0	0	0	0	0	0	0	0	0	0	0	0	0	0
V1.UC-14.scaffold28005_1	25175	5	4			0	0	0	5	0	0	0	0	0	0	0	0	0	0	0	0	0	0	0	0	0	0	0	0	0	0	0	0	10.2248	0	0	0	0	0	0	0	0	0	0	0	0	0	0	0
V1.UC-14.scaffold28509_2	22106	12	11			0	0	0	4	0	0	0	0	0	0	0	0	0	0	0	0	0	0	0	0	0	0	0	0	0	0	0	0	0	0	0	0	0	0	0	0	0	0	0	0	0	0	0	0
V1.UC-14.scaffold34724_1	23043	17	15			0	1	0	40	3.49165	0	0	0	0	0.436416	19.2594	0	0	0	0	0	0	2.09439	1.04635	6.32484	0	0	0	0	0	0	0	0	0	5.19783	0	0	1.60448	2.9429	2.21123	0	0.591184	0	0.422487	1.05562	0	0	0	0
V1.UC-14.scaffold56426_1	10985	19	10			0	0	0	4	0	0	0	0	0	4.64635	0	0	0	0	0	0	0	0	0	0	0	0	0	0	0	0	0	0	0	0	0	0	0	0	0	0	0	0	0	0	0	0	0	0
V1.UC-14.scaffold56426_2	11504	19	17			0	0	0	1	0	0	0	0	0	0	0	0	0	0	0	0	0	0	0	0	0	0	0	0	0	0	0	0	0	0	0	0	0	0	0	0	0	0	0	0	0	0	0	0
V1.UC-14.scaffold7074_1	18392	1	1			0	0	0	1	0	0	0	0	0	0	0	0	0	0	0	0	0	0	0	0	0	0	0	0	0	0	0	0	0	0	0	0	0	0	0	0	0	0	0	0	0	0	0	0
V1.UC-14.scaffold71012_1	27274	5	4			0	1	0	29	2.2683	0	0	0	0	0.272694	10.6366	0	0	0	0	0	0	1.65588	0	3.1501	0	0	0	0	0	0	0	0	0	3.97098	0	0	1.27995	2.33874	1.59055	0	0	0	0	0.821927	0	0	0	0
V1.UC-14.scaffold88877_1	25015	3	3			0	0	0	4	0	0	0	0	0	0	0	0	0	0	0	0	0	0	0	0	0	0	0	0	0	0	0	0	0	0	0	0	0	0	0	0	0	0	0	0	0	0	0	0
V1.UC-14.scaffold89243_1	13477	1	1			0	0	1	2	0	0	0	0	0	0	0	0	0	0	0	0	0	0	0	0	0	0	0	0	0	0	0	0	0	0	0	0	0	0	0	0	0	0	0	0	0	0	0	0
V1.UC-15.scaffold1375_10	12710	6	5			0	0	1	22	0	0	0	0	0	0.161907	0	3.46841	0	1.12004	1.43904	0	0	0	0	0	0	0	0	0	0	0	0	0	0	0	0	0	0	0	0	0	0	0	0	0	0	0	0	0.5971
V1.UC-15.scaffold14129_1	22959	2	2			0	0	0	32	0	0	0	0	0	0	1.67936	0.870541	0	0	0	0	0	0	0	0	0.855887	1.21772	0	0	0	0	0	0	0	0	1.05292	0	0	0	0	0	2.14086	2.75951	1.82863	1.56799	0	0	1.65542	0
V1.UC-15.scaffold1548_9	29375	4	3			0	0	0	12	0	0	0	0	0	0	0	0	0	0.867721	0	0.42356	0	0.341628	0	0	0	0	0	0	0	0	0	0	0.409742	0	0	0	0	0.410216	0	0	0	0	0	0	0	0	0	0
V1.UC-15.scaffold16828_1	24969	23	18			0	0	0	7	0	0	0	0	0	0	0	0	0	0	0	0	0	0	0	0	0	0	0	0	0	0	0	0	0.979106	0	0	0	0	0	0	0	0	0	0	0	0	0	0	0
V1.UC-15.scaffold2638_13	43655	10	10			0	0	0	7	0	0	0	0	0	0	0	0	0	0	0.799398	0.767489	0	0	0	0	0	0	0	0	0	0	0	0	0	0	0	0	0	0	0	0	0	0	0	0	0	0	0	0
V1.UC-15.scaffold3192_8	10429	1	1			0	0	0	1	0	0	0	0	0	0	0	0	0	0	0	0	0	0	0	0	0	0	0	0	0	0	0	0	0	0	0	0	0	0	0	0	0	0	0	0	0	0	0	0
V1.UC-15.scaffold3728_1	16632	1	1			0	0	0	13	0	0	0	0	0	0	0	4.31595	0	0	0	0.514167	0	0	0	0	0	0	0	0	0.927129	0	0	0	0	0	0	0	0	0	0.511085	0	0	0	0	0	0.607375	1.38381	0	0
V1.UC-15.scaffold4546_2	69475	4	4		Parabacteroides_sp._D13	0	0	0	2	0	0	0	0	0	0	0	0	0	0	0	0	0	0	0	0	0	0	0	0	0	0	0	0	0	0	0	0	0	0	0	0	0	0	0	0	0	0	0	0
V1.UC-15.scaffold508_1	16255	2	2			0	0	0	12	0	0	1.42615	0	0	0.570063	0	0	0	0	0	0	0	0	0	0	0	0	0	0	0	0	0	0	0	0	0	0	0	0	0	0	0	0	0	0	0	2.85835	0	0
V1.UC-15.scaffold60191_1	15551	86	32			0	0	0	2	0	0	0	0	0	0	0	0	0	0	0	0	0	0	0	0	0	0	0	0	0	0	0	0	0	0	0	0	0	0	0	0	0	0	0	0	0	0	0	0
V1.UC-17.scaffold13715_4	10028	2	2			0	0	0	9	0	0	0	0	0	0	1.5009	0	0	0	0	0	0	0	0	0	0	0	0	0	0	0	0	4.90592	0	0	0	0	1.54008	0	0	0	0	0	0	0	0	0	0	0
V1.UC-17.scaffold22483_1	27597	7	5		Eubacterium_siraeum_DSM_15702	0	0	0	1	0	0	0	0	0	0	0	0	0	0	0	0	0	0	0	0	0	0	0	0	0	0	0	0	0	0	0	0	0	0	0	0	0	0	0	0	0	0	0	0
V1.UC-17.scaffold27220_3	16040	3	2	Bacteroides_sp._4_3_47FAA_32443		0	0	0	1	0	0	0	0	0	0	0	0	0	0	0	0	0	0	0	0	0	0	0	0	0	0	0	0	0	0	0	0	0	0	0	0	0	0	0	0	0	0	0	0
V1.UC-17.scaffold41729_1	20850	3	3			0	0	0	1	0	0	0	0	0	0	0	0	0	0	0	0	0	0	0	0	0	0	0	0	0	0	0	0	0	0	0	0	0	0	0	0	0	0	0	0	0	0	0	0
V1.UC-17.scaffold71199_5	34100	1	1			0	0	0	1	0	0	0	0	0	0	0	0	0	0	0	0	0	0	0	0	0	0	0	0	0	0	0	0	0	0	0	0	0	0	0	0	0	0	0	0	0	0	0	0
V1.UC-18.scaffold11932_8	10663	2	1			0	0	0	16	0	0	0	0	0	0	0	0	0	0	0	0	0	0	4.55843	0	0	0	0	1.16037	0	0	0	0	0	0	0	0	0	0	0	0	0	0	0	0	0	0	0	0
V1.UC-18.scaffold12733_1	16720	48	31	Bacteroides_sp._3_1_33FAA_38353; Bacteroides_sp._4_3_47FAA_32443	Bacteroides_sp._4_3_47FAA	1	0	1	1	0	0	0	0	0	0	0	0	0	0	0	0	0	0	0	0	0	0	0	0	0	0	0	0	0	0	0	0	0	0	0	0	0	0	0	0	0	0	0	0
V1.UC-18.scaffold14473_5	11038	23	21			0	1	0	55	1.91221	0	8.69113	0	0	0	1.93527	0	1.57891	0	0	1.94496	0	2.59752	4.87746	0	9.31646	4.36341	3.51039	0	0	0	0	0	0	0	3.8756	0	0	0	1.71785	0	0	1.49882	2.47318	2.73053	0	0	1.57758	0
V1.UC-18.scaffold17044_1	18012	1	1			0	0	0	5	0	0	0	0	0	0	0	0	0	0	0	0	0	0	0	0	0	0	0	0	0	0	0	0	0	0	0	0	0	0	0	0	0	0	0	0	0	0	0	0
V1.UC-18.scaffold19868_10	15595	1	1	Roseburia_intestinalis_L1-82_30005		0	0	0	22	0	0	0	0	0	0	0	0	0	0	0	0	0	0	0	3.34137	0	0	0	0	11.1023	0	0	0	0	0	1.4017	3.68468	0	0	0	0	0	0	0	0	8.97934	0	0	0
V1.UC-18.scaffold23434_11	11673	2	2			0	0	0	2	0	0	0	0	0	0	0	0	0	0	0	0	0	0	0	0	0	0	0	0	0	0	0	0	0	0	0	0	0	0	0	0	0	0	0	0	0	0	0	0
V1.UC-18.scaffold27350_1	35051	9	8			0	1	0	42	0	0.519439	0	0	0	0	0	3.15943	0	2.14794	1.00191	0.600293	0	0	0	2.59087	0	0	5.42623	0	0	1.58178	0	0	0	0	0	0.910152	0.504644	0.481015	1.66573	0	0	0.452132	0.785671	0	0.599167	1.29542	0	0
V1.UC-18.scaffold28186_6	14153	2	1			0	0	0	7	0	0	0	0	0	0	0	0	0	0	0	0	0	0	0	0	0	0	0	0	0	0	0	0	0	0	0	0	0	0	0	0	0	0	0	0	0	0	0	0
V1.UC-18.scaffold3250_1	26978	4	3			0	0	0	22	0	0	0	0	0	0	1.15957	0	0	0	0	0	0	1.31793	0	0	0	2.22889	0	0	0	0	0	0	1.80728	0	7.36623	0	0	0	0	0	0	0	0	0	2.85411	4.50311	0	0
V1.UC-18.scaffold35335_2	10818	18	11			0	0	0	1	0	0	0	0	0	0	0	0	0	0	0	0	0	0	0	0	0	0	0	0	0	0	0	0	0	0	0	0	0	0	0	0	0	0	0	0	0	0	0	0
V1.UC-18.scaffold46676_2	10518	1	1			0	0	0	2	0	0	0	0	0	0	0	0	0	0	0	0	0	0	0	0	0	0	0	0	0	0	0	0	0	0	0	0	0	0	0	0	0	0	0	0	0	0	0	0
V1.UC-18.scaffold47087_5	30457	3	3			0	0	0	45	0	5.35661	0	0	2.06466	1.80613	0	0	1.95103	0	3.50244	0.166758	1.39035	1.40012	0	2.70014	1.27087	0	3.2671	0	0.933893	5.3765	0	0.621403	0.774329	0	2.57514	1.38256	0	0	0	0	0	0	0	0.860967	0.635744	0	0.477181	0.590912
V1.UC-18.scaffold48715_1	29742	1	1			0	0	0	1	0	0	0	0	0	0	0	0	0	0	0	0	0	0	0	0	0	0	0	0	0	0	0	0	0	0	0	0	0	0	0	0	0	0	0	0	0	0	0	0
V1.UC-18.scaffold5435_12	10587	4	3			0	0	0	6	0	0	0	0	0	0	0	0	0	0	0	0	0	0	0	0	0	0	0	0	0	0	0	0	0.697306	0	0	0	0	0	0	0	0	0	0	0	0	0	0	0
V1.UC-18.scaffold5435_13	10445	1	1			0	0	0	8	0	0	0	0	0	0	0	0	0	0	0	0	0	0	0	0	0	0	0	0	0	0	0	0	0.677354	0	0	0	0	0	0.367367	0	0	0	0	0	0	0	0	0
V1.UC-18.scaffold67224_2	11405	5	4			0	0	1	4	0	0	0	0	0	0	0	0	0	0	0	0	0	1.39878	0	0	0	0	0	0	0	0	0	0	0	0	0	0	0.693141	0	0	0	0	0	0	0	0	0	0	0
V1.UC-18.scaffold68310_1	23769	2	2			0	0	0	25	0	3.24477	0	0	0	0	0.997878	0	0	0	0	0	0	0	0	0	0	0	8.17899	24.646	0	0	0	0	2.84877	0	0	0	0	0	0	0	0	1.72348	0	0	0	0	0	4.24237
V1.UC-19.scaffold10147_5	16560	15	13			0	0	0	1	0	0	0	0	0	0	0	0	0	0	0	0	0	0	0	0	0	0	0	0	0	0	0	0	0	0	0	0	0	0	0	0	0	0	0	0	0	0	0	0
V1.UC-19.scaffold1123_1	22186	2	2			0	0	1	5	0	0	0	0	0	0	0	0	0	0	0	0	0	0	0	0	0	0	0	0	0	0	0	0	0	0	0	0	0	0	0	0	0	0.537572	0	0	0	0	0	0
V1.UC-19.scaffold12688_2	21382	4	3			1	1	0	15	0	0	0	7.78194	0	0	0	0	0	0	0	6.62675	0	0	0	10.7911	0	0	4.35021	0	0	0	0	0	0	0	4.21653	8.24587	0	0.806424	2.81895	0	0	0	0	0	0	0	0	0
V1.UC-19.scaffold13401_1	16000	11	11			0	0	0	1	0	0	0	0	0	0	0	0	0	0	0	0	0	0	0	0	0	0	0	0	0	0	0	0	0	0	0	0	0	0	0	0	0	0	0	0	0	0	0	0
V1.UC-19.scaffold16581_5	17176	5	5			0	0	0	1	0	0	0	0	0	0	0	0	0	0	0	0	0	0	0	0	0	0	0	0	0	0	0	0	0	0	0	0	0	0	0	0	0	0	0	0	0	0	0	0
V1.UC-19.scaffold17918_3	59586	6	6		Roseburia_intestinalis_L1-82	0	0	0	51	0	0	1.30355	0	0	0.405901	5.15117	3.18543	0	6.69506	3.35151	0	0	0	0	1.74933	1.4336	0	1.88252	0	0	0	1.35257	0	0	0	1.73162	0.741408	0	0	0.901242	0	0	0	0.891409	0	0	4.66239	0	0
V1.UC-19.scaffold19758_4	10355	13	11			0	0	0	9	0	0	0	0	0	0	0	0	0	0	0	0.182553	0	0	0	0	0	0	0	0	0	0	0	0	0	0	0	0	0	0	0	0	0	0	0	0	0	0	0	1.8857
V1.UC-19.scaffold22273_4	32029	1	1		Roseburia_intestinalis_L1-82	0	0	0	57	0	0	1.41809	0	0	0.358399	5.56153	2.64549	0	7.7389	3.60154	0	0	0	0	1.91718	1.73238	0	2.05008	0	0	0	1.3841	0	0	0	2.0002	0.69461	0	0	0.722035	0	0	0	1.01971	0	0	5.33108	0	0
V1.UC-19.scaffold23278_1	11868	9	8			0	0	0	2	0	0	0	0	0	0	0	0	0	0	0	0	0	0	0	0	0	0	0	0	0	0	0	0	0	0	0	0	0	0	0	0	0	0	0	0	0	0	0	0
V1.UC-19.scaffold2480_4	19419	1	1		Coprococcus_eutactus_ATCC_27759	0	0	0	2	0	0	0	0	0	0	0	0	0	0	0	0	0	0	0	0	0	0	0	0	0	0	0	0	0	0	0	0	0	0	0	0	0	0	0	0	0	0	0	0
V1.UC-19.scaffold2480_6	19044	3	3			0	0	0	2	0	0	0	0	0	0	0	0	0	0	0	0	0	0	0	0	0	0	0	0	0	0	0	0	0	0	0	0	0	0	0	0	0	0	0	0	0	0	0	0
V1.UC-19.scaffold36192_1	24998	6	5			0	0	0	9	0	0	0	0	0	0	0	0	0.957076	0	2.46264	0	0	0	0	0	0	0	0	0	0	2.9283	0	0	0	0	0	0	0	0	0	0	0	0	0	3.34541	0	0	0	0
V1.UC-19.scaffold36897_3	36250	33	25			0	0	0	28	0	0	5.64698	0	0	0	0	5.30718	0	0	0	0	0	0.769185	0	0	0	0	1.13025	0	0	0	0	0	0.904848	0	0	0	0	1.03037	0	2.02585	0	0	0	0	0.637583	1.23131	0	0
V1.UC-19.scaffold6148_14	50046	6	5			1	0	0	40	0	4.52162	0	0	0	0	0	0	0	0	0	1.58781	2.86143	0	4.30228	0	0	0	10.52	0	0	0	0	10.9656	1.60247	0	0	0	0	0	0	0	2.69963	2.41947	2.0769	1.30245	0	0	0.954368	5.10417
V1.UC-19.scaffold73162_1	27604	3	2			0	0	0	1	0	0	0	0	0	0	0	0	0	0	0	0	0	0	0	0	0	0	0	0	0	0	0	0	0	0	0	0	0	0	0	0	0	0	0	0	0	0	0	0
V1.UC-19.scaffold7334_2	15652	22	13			0	0	0	1	0	0	0	0	0	0	0	0	0	0	0	0	0	0	0	0	0	0	0	0	0	0	0	0	0	0	0	0	0	0	0	0	0	0	0	0	0	0	0	0
V1.UC-19.scaffold80970_4	17474	2	2			0	0	0	2	0	0	0	0	0	0	0	0	0	0	0	0	0	0	0	0	0	0	0	0	0	0	0	0	0	0	0	0	0	0	0	0	0	0	0	0	0	0	0	0
V1.UC-19.scaffold9408_3	19718	5	3			1	0	0	1	0	0	0	0	0	0	0	0	0	0	0	0	0	0	0	0	0	0	0	0	0	0	0	0	0	0	0	0	0	0	0	0	0	0	0	0	0	0	0	0
V1.UC-21.scaffold11059_3	10368	3	2			0	0	0	2	0	0	0	0	0	0	0	0	0	0	0	0	0	0	0	0	0	0	0	0	0	0	0	0	0	0	0	0	0	0	0	0	0	0	0	0	0	0	0	0
V1.UC-21.scaffold18503_4	17574	25	21		Bacteroides_sp._4_3_47FAA	0	1	0	1	0	0	0	0	0	0	0	0	0	0	0	0	0	0	0	0	0	0	0	0	0	0	0	0	0	0	0	0	0	0	0	0	0	0	0	0	0	0	0	0
V1.UC-21.scaffold24103_1	28661	2	2			0	0	0	5	0	0	0	0	0	0	0	0	0	0	0	0	0	0	0	0	1.0331	0	0	0	0	0	0	0	0	0	0	0	0	0	0	0	0	0	0	0	0	0	0	0
V1.UC-21.scaffold27073_1	47976	66	38	Clostridium_sp._L2-50_18211		0	0	0	10	0	0	0	1.80011	0	0	0	0	0.294212	0	0	0	0	0.353415	0	0	0	0	0	0	0	0	0	0	3.00117	0	0	0	0	0	0	0	0	0	0	0	0	1.40058	0	0
V1.UC-21.scaffold27938_2	23907	20	15			0	0	0	26	0	0	0	0	0	0	0	6.03411	0	1.46462	0	0	0	0	0	0	0	0	0	0	0	0	0	0	1.0792	0	0	0	0	1.38557	0	2.51908	0	0	0	0	0.725463	0	0.492852	0
V1.UC-21.scaffold2953_1	18144	37	26			0	0	0	1	0	0	0	0	0	0	0	0	0	0	0	0	0	0	0	0	0	0	0	0	0	0	0	0	0	0	0	0	0	0	0	0	0	0	0	0	0	0	0	0
V1.UC-21.scaffold33309_1	16531	8	6		Faecalibacterium_prausnitzii_M21/2	0	0	0	4	0	0	0	0	0	0.729468	0	0	0	0	0.714087	0	0	0	0	0	0	0	0	0	0	0	0	0	0	0	0	0	0	0	0	0	0	0	0	0	0	0	0	0
V1.UC-21.scaffold33309_2	10823	4	4			0	0	0	3	0	0	0	0	0	0.691582	0	0	0	0	0	0	0	0	0	0	0	0	0	0	0	0	0	0	0	0	0	0	0	0	0	0	0	0	0	0	0	0	0	0
V1.UC-21.scaffold4819_7	33762	8	4			0	0	0	2	0	0	0	0	0	0	0	0	0	0	0	0	0	0	0	0	0	0	0	0	0	0	0	0	0	0	0	0	0	0	0	0	0	0	0	0	0	0	0	0
V1.UC-21.scaffold7256_4	18463	5	4			0	0	0	4	0	0	0	0	0	0	0	0	0	0	0	0	0	0	0	0	0	0	0	0	0	0	0	0	0	0	0	0	0	0	0	0	0	0	0	0	0	3.00239	0	0
V1.UC-6.scaffold13939_5	12636	1	1			0	0	0	3	0	0	0	0	0	0	0	0	0	0	0	0	0	0	0	0	0	0	0	0	0	0	0	0	0	0	0	0	0	0	0	0	0	0	0	0	0	0	0	0
V1.UC-6.scaffold69016_3	15341	1	1			0	0	0	15	0	0	0	0	0	0	0	6.32494	0	0	0	0.853224	0	0	2.09903	0	0	0	0	0	0	0	0	0	0	0	0	0	0	0	0	0	0	0	0	0	0	0	0	0
V1.UC-6.scaffold90345_1	15359	4	2			0	0	0	2	0	0	0	0	0	0	0	0	0	0	0	0	0	0	0	0	0	0	0	0	0	0	0	0	0	0	0	0	0	0	0	0	0	0	0	0	0	0	0	0
V1.UC-6.scaffold9175_7	13456	11	9			0	0	0	76	0	4.35801	1.0504	3.1065	3.78406	4.88646	3.08236	2.49429	0.658669	5.34083	0.918229	3.33093	7.33726	3.78205	0	0	0.876424	0	0	3.29706	2.00256	2.74194	0.814598	1.7765	6.25002	0	3.73926	0	1.50262	3.22678	0	2.12271	0	2.70512	3.14957	1.90754	1.2662	3.5467	0	0
V1.UC-7.scaffold4461_2	39906	20	19			0	0	0	27	0	0	0	0	0	0.665967	0	0	0	0	0	0	0	0	0	0	0	0	0	0	2.28866	0	0	0	0	0	0	0	0.815316	0	0.47265	0.549431	0	1.47376	0	0	0	0	0	0.557715
V1.UC-7.scaffold50299_2	18002	4	4			0	0	0	5	0	0	0	1.89056	0	0	0	0	0	0	0	0	0	0	0	0	0	0	0	0	0	0	0	0	0	0	0	0	0	0	0	0	0	0	0	0	0	0	0	0
V1.UC-7.scaffold51867_1	15111	8	6			0	0	0	4	0	0	0	0	0	0	0	0	0	0	0	0	0	0	0	0	0	0	0	0	0	0	0	0	0	0	0	0	0	0	0	0	0	0	0	0	0	1.19735	0	0
V1.UC-8.scaffold19194_1	50103	2	1			0	0	0	5	0	0	0	0	0	0	0	0	0	0	0	0	0	0	0	0	0	0	0	0	0	0	0	0	0	0	0	0	0	0	0	0	0	0	0	0	0	0	0	0
V1.UC-8.scaffold19258_4	10434	4	4			0	0	0	2	0	0	0	0	0	0	0	0	0	0	0	0	0	0	0	0	0	0	0	0	0	0	0	0	0	0	0	0	0	0	0	0	0	0	0	0	0	0	0	0
V1.UC-8.scaffold20814_9	12542	6	6			0	0	0	1	0	0	0	0	0	0	0	0	0	0	0	0	0	0	0	0	0	0	0	0	0	0	0	0	0	0	0	0	0	0	0	0	0	0	0	0	0	0	0	0
V1.UC-8.scaffold2262_8	48645	1	1			0	0	0	4	0	0	0	0	0	0	0	0	0	0	0	0	0	0	0	0	0	0	0	0	0	0	0	0	0	0	0	0	0	0	0	0	0	0	0	0	0	0	0	0
V1.UC-8.scaffold24810_2	10084	2	2			0	0	0	12	0	0	0	0	0	0	0	0	0.530379	2.89047	0	0.188615	0	0	0	0	0	0	0	0	0	0	0	0	0	0	0	0	0	0	0	0	0	0	0	0	0	0	0	0
V1.UC-8.scaffold29333_5	10523	7	5			0	0	0	7	0	0	0	2.14758	0	0	0	0	0	0	0	0	0	0	0	0	0	0	0	0	0	0	0	0	0	0	0	0	0	0	0	0	0	0	0	0	0	0	0	0
V1.UC-8.scaffold62007_1	25504	4	4			0	0	0	1	0	0	0	0	0	0	0	0	0	0	0	0	0	0	0	0	0	0	0	0	0	0	0	0	0	0	0	0	0	0	0	0	0	0	0	0	0	0	0	0
V1.UC-8.scaffold70287_3	40497	25	10			0	1	0	4	0	0	0	0	0	0	0	0	0	0	0	0	0	0	0	0	0	0	0	0	0	0	0	0	0	0	0	0	0	0	0	0	0	0	0	0	0	0	0	0
V1.UC-8.scaffold87642_1	14168	12	9			0	0	0	5	0	0	0	2.93027	0	0	0	0	0	0	0	0	0	0	0	0	0	0	0	0	0	0	0	0	0	0	0	0	0	0	0	0	0	0	0	0	0	0	0	0
V1.UC-8.scaffold96492_1	12941	9	8			0	0	0	4	0	0	0	0	0	0	0	0	0	0	0	1.45778	0	0	0	0	0	0	0	0	0	0	0	0	0	0	0	0	0	0	0	0	0	0	0	0	0	0	0	0
V1.UC-8.scaffold97023_5	17042	4	3			0	0	0	1	0	0	0	0	0	0	0	0	0	0	0	0	0	0	0	0	0	0	0	0	0	0	0	0	0	0	0	0	0	0	0	0	0	0	0	0	0	0	0	0
V1.UC-9.scaffold24720_4	21037	4	3			1	1	0	2	0	0	0	0	0	0	0	0	0	0	0	4.62656	0	0	0	0	0	0	0	0	0	0	0	0	0	0	0	0	0	0	0	0	0	0	0	0	0	0	0	0
V1.UC-9.scaffold24720_5	32403	8	6			1	1	0	1	0	0	0	0	0	0	0	0	0	0	0	0	0	0	0	0	0	0	0	0	0	0	0	0	0	0	0	0	0	0	0	0	0	0	0	0	0	0	0	0
V1.UC-9.scaffold24720_7	18048	3	3			1	1	0	2	0	0	0	0	0	0	0	0	0	0	0	0	0	0	0	13.3968	0	0	0	0	0	0	0	0	0	0	0	0	0	0	0	0	0	0	0	0	0	0	0	0
V1.UC-9.scaffold25059_16	20920	8	6			0	0	0	19	0	0	0	0	0	0	0	0	1.39886	0	0	0	4.80831	0	0	0	0	0	0	0	0	0	0	0.958402	0.550534	0	0	0	0	0	0	1.48748	0	0	1.10746	0	0	0	0	0
V1.UC-9.scaffold25497_1	26427	4	4			0	0	0	4	0	2.96605	0	0	0	0	0	0	0	0	0	0	16.6797	0	0	0	0	0	0	0	0	0	0	0	0	0	0	0	0	0	0	0	0	0	0	0	0	0	0	0
V1.UC-9.scaffold2604_2	38291	1	1			0	0	0	9	0	0	11.7356	0	0	0	0	0	0	0	0	0	0	3.0989	3.15588	0	0	0	0	0	0	0	0	0	0	0	0	0	0	0	0	0	0	0	0	0	0	0	0	0
V1.UC-9.scaffold26453_1	15589	9	8			0	0	0	1	0	0	0	0	0	0	0	0	0	0	0	0	0	0	0	0	0	0	0	0	0	0	0	0	0	0	0	0	0	0	0	0	0	0	0	0	0	0	0	0
V1.UC-9.scaffold26453_2	30193	6	6			0	1	0	2	0	0	0	0	0	0	0	0	0	0	0	0	0	0	0	0.888473	0	0	0	0	0	0	0	0	0	0	0	0	0	0	0	0	0	0	0	0	0	0	0	0
V1.UC-9.scaffold4248_1	10071	1	1			0	0	0	1	0	0	0	0	0	0	0	0	0	0	0	0	0	0	0	0	0	0	0	0	0	0	0	0	0	0	0	0	0	0	0	0	0	0	0	0	0	0	0	0
V1.UC-9.scaffold53145_2	10663	9	8			0	0	0	10	0	1.54109	0	0	0	0	0	0	0.431125	0	0	0	0	0	0	0	0	0	5.85483	0	0	0	0	0	0	0	0	0	0	0	0	0	0	0	0	0	0	0	0	0
V1.UC-9.scaffold65715_4	11910	5	5			0	0	0	8	0	0	0	0	0	0	0	0	0	0	0	0	0	0	0	0	0	0	5.50839	0	0	0	0	0	0	0	0	0	0	0	0	0	0	0	0	0	0	0	0	0
V1.UC-9.scaffold793_10	10589	2	2			0	0	0	7	0	5.57099	0	0	0	0	0	0	0	0	0	0	0	0	0	0	0	0	0	0	0	0	0	0	0	0	0	0	0	0	0	0	0	0	0	0	0	0	0	0
V1.UC-9.scaffold8038_11	18232	1	1			0	0	0	41	0	1.93211	0	3.01662	0	1.74009	0	0	1.96978	0	0.37487	0.753385	0	1.66515	6.22583	0	1.51481	0	0	0	1.06953	1.12935	0	0.587944	3.71186	0	0	0	0	0	0	1.05062	0	0	0.656362	0	0.606849	0	1.87786	1.0322
V1.UC-9.scaffold84606_1	20752	2	2			1	0	0	1	0	0	0	0	0	0	0	0	0	0	0	0	0	0	0	0	0	0	0	0	0	0	0	0	0	0	0	0	0	0	0	0	0	0	0	0	0	0	0	0
V1.UC-9.scaffold85382_2	21789	5	3			1	1	0	1	0	0	0	0	0	0	0	0	0	0	0	0	0	0	0	0	0	0	0	0	0	0	0	0	0	0	0	0	0	0	0	0	0	0	0	0	0	0	0	0
V1.UC-9.scaffold88471_1	20822	1	1			0	0	0	2	0	0	0	0	0	0	0	0	0	0	0	0	0	0	0	0	0	0	0	0	0	0	0	0	0	0	0	0	0	0	0	0	0	0	0	0	0	0	0	0
V1.UC-9.scaffold89204_1	11218	3	3			0	0	0	2	0	0	0	0	0	0	0	0	0	0	0	0	0	0	0	0	0	0	0	0	0	0	0	0	0	0	0	0	0	0	0	0	0	0	0	0	0	0	0	0
V1.UC-9.scaffold92622_1	27213	2	1			0	0	0	1	0	0	0	0	0	0	0	0	0	0	0	0	0	0	0	0	0	0	0	0	0	0	0	0	0	0	0	0	0	0	0	0	0	0	0	0	0	0	0	0
										80	125	116	94	61	181	129	62	150	92	127	179	88	143	79	112	94	57	65	72	65	71	54	84	131	98	138	136	101	110	110	165	68	127	115	104	128	153	110	108
								AVG	12.6115
								MED	5
[truncated: 85 more columns]
