# Supplementary material for: CRISPR targeting reveals a reservoir of common phages associated with the human gut microbiome
Source: HighWire-hosted journal article supplement (doi:10.1101/gr.138297.112), 2012-06-25
Supplement: Stern_DatasetS7.xlsx [file Stern_DatasetS7.xlsx]

## Sheet: binary_dist_with_header
	MH0001	MH0002	MH0003	MH0004	MH0005	MH0006	MH0007	MH0008	MH0009	MH0010	MH0011	MH0012	MH0013	MH0014	MH0015	MH0016	MH0017	MH0018	MH0019	MH0020	MH0021	MH0022	MH0023	MH0024	MH0025	MH0026	MH0027	MH0028	MH0030	MH0031	MH0032	MH0033	MH0034	MH0035	MH0036	MH0037	MH0038	MH0039	MH0040	MH0041	MH0042	MH0043	MH0044	MH0045	MH0046	MH0047	MH0048	MH0049	MH0050
MH0001	0	0.794118	0.826347	0.748201	0.741071	0.797235	0.685535	0.845529	0.75	0.845638	0.767857	0.817352	0.849315	0.725714	0.822222	0.807453	0.711111	0.904	0.884615	0.80315	0.84	0.762295	0.824561	0.80292	0.794286	0.737589	0.79558	0.8	0.777027	0.766234	0.782051	0.775	0.816	0.830508	0.757962	0.842767	0.769231	0.857843	0.782051	0.754967	0.811518	0.860465	0.69697	0.756098	0.77551	0.776786	0.724138	0.833333	0.776316
MH0002	0.794118	0	0.835749	0.769663	0.734694	0.73029	0.76699	0.873494	0.726852	0.787709	0.659574	0.7173	0.79661	0.686275	0.866667	0.820896	0.803279	0.923077	0.8125	0.791411	0.75	0.775	0.852564	0.777778	0.645503	0.801075	0.793578	0.791667	0.758242	0.756614	0.763158	0.705357	0.877907	0.758621	0.736842	0.807292	0.783654	0.769911	0.782383	0.780105	0.740741	0.724868	0.767772	0.791262	0.763736	0.840764	0.795812	0.850932	0.790576
MH0003	0.826347	0.835749	0	0.839779	0.879747	0.835294	0.804878	0.828947	0.8125	0.857143	0.785	0.847656	0.813953	0.772512	0.825301	0.836735	0.727273	0.876623	0.839744	0.81761	0.882716	0.845679	0.835616	0.863636	0.818182	0.824176	0.754902	0.727273	0.857895	0.829016	0.846939	0.819328	0.864197	0.869767	0.827411	0.877551	0.803922	0.788288	0.829016	0.782609	0.831111	0.857143	0.78744	0.79397	0.793296	0.755396	0.798913	0.802721	0.825397
MH0004	0.748201	0.769663	0.839779	0	0.708333	0.829787	0.781421	0.861314	0.681081	0.858896	0.765363	0.764706	0.794702	0.746032	0.876623	0.816092	0.721088	0.93662	0.830882	0.805755	0.87234	0.690476	0.766667	0.755245	0.743017	0.792453	0.834171	0.776596	0.773585	0.692308	0.785714	0.730392	0.817518	0.772222	0.805714	0.835294	0.793478	0.771144	0.778443	0.7375	0.770408	0.77193	0.768817	0.834225	0.824242	0.782258	0.690789	0.842105	0.795181
MH0005	0.741071	0.734694	0.879747	0.708333	0	0.807882	0.797468	0.966387	0.736527	0.804688	0.794872	0.781726	0.788618	0.785714	0.939394	0.823129	0.769841	0.907407	0.844037	0.843478	0.8	0.777778	0.838384	0.811475	0.728477	0.847826	0.869318	0.854651	0.772727	0.751825	0.778571	0.797872	0.868421	0.787097	0.79452	0.81295	0.796178	0.855615	0.787234	0.818182	0.754491	0.770833	0.826347	0.885542	0.824817	0.854369	0.797101	0.919643	0.789855
MH0006	0.797235	0.73029	0.835294	0.829787	0.807882	0	0.76	0.92	0.750943	0.77027	0.727273	0.741259	0.850427	0.655602	0.864629	0.804082	0.755656	0.898148	0.828571	0.86036	0.788177	0.776699	0.859223	0.755869	0.756972	0.797414	0.791667	0.825926	0.723982	0.75641	0.751073	0.708955	0.873303	0.737705	0.740425	0.817427	0.728395	0.767528	0.826613	0.775424	0.743295	0.752101	0.725807	0.729167	0.772926	0.893023	0.842105	0.868545	0.783898
MH0007	0.685535	0.76699	0.804878	0.781421	0.797468	0.76	0	0.775641	0.702326	0.744318	0.707071	0.768	0.814208	0.723005	0.893617	0.795	0.718391	0.8	0.852071	0.824561	0.865497	0.780488	0.78	0.747059	0.755981	0.792553	0.758139	0.732057	0.729282	0.715054	0.742105	0.721739	0.791411	0.763285	0.708995	0.780105	0.740196	0.752212	0.768041	0.711956	0.733945	0.781095	0.68	0.695876	0.727778	0.768212	0.748663	0.833333	0.72973
MH0008	0.845529	0.873494	0.828947	0.861314	0.966387	0.92	0.775641	0	0.84153	0.842105	0.788462	0.894495	0.863636	0.835227	0.844262	0.89172	0.8	0.855769	0.885965	0.910569	0.905172	0.863248	0.873786	0.850394	0.877907	0.814815	0.802395	0.862069	0.883562	0.829932	0.853333	0.841837	0.828829	0.847561	0.827815	0.855172	0.848485	0.850267	0.868421	0.811189	0.882353	0.89441	0.874286	0.776316	0.851064	0.821782	0.823944	0.792079	0.841379
MH0009	0.75	0.726852	0.8125	0.681081	0.736527	0.750943	0.702326	0.84153	0	0.758974	0.661836	0.699605	0.785714	0.697778	0.849246	0.809091	0.755102	0.875	0.831522	0.837696	0.837838	0.729885	0.847458	0.728261	0.58794	0.76	0.758621	0.734513	0.757426	0.7	0.779343	0.670886	0.827957	0.768889	0.681592	0.796208	0.724771	0.747934	0.75	0.759615	0.69163	0.739336	0.738938	0.713615	0.730965	0.817143	0.718593	0.870968	0.738916
MH0010	0.845638	0.787709	0.857143	0.858896	0.804688	0.77027	0.744318	0.842105	0.758974	0	0.704142	0.74537	0.881988	0.776042	0.882353	0.847458	0.776316	0.808	0.862319	0.794118	0.886525	0.835714	0.876923	0.842105	0.732954	0.841463	0.820513	0.806283	0.778481	0.797619	0.745342	0.770335	0.896552	0.783333	0.760479	0.804878	0.757062	0.703704	0.825581	0.837209	0.816832	0.790698	0.792553	0.690909	0.77707	0.879699	0.806061	0.890511	0.792683
MH0011	0.767857	0.659574	0.785	0.765363	0.794872	0.727273	0.707071	0.788462	0.661836	0.704142	0	0.725	0.831522	0.726415	0.861878	0.810945	0.758427	0.898204	0.814815	0.808383	0.792453	0.705882	0.801324	0.744048	0.605405	0.756906	0.784404	0.771028	0.733333	0.725807	0.690608	0.684685	0.866279	0.76699	0.712766	0.809278	0.69898	0.727273	0.809045	0.736559	0.760181	0.721053	0.728155	0.757426	0.731844	0.797386	0.745946	0.816456	0.71978
MH0012	0.817352	0.7173	0.847656	0.764706	0.781726	0.741259	0.768	0.894495	0.699605	0.74537	0.725	0	0.828947	0.742188	0.837838	0.845238	0.775785	0.907407	0.815534	0.859091	0.809756	0.768473	0.863415	0.753555	0.702929	0.816239	0.785441	0.837638	0.744395	0.743478	0.709821	0.716418	0.851163	0.73029	0.716157	0.805907	0.762097	0.74717	0.839357	0.794118	0.716535	0.722944	0.749004	0.802372	0.807692	0.902326	0.770563	0.850962	0.776824
MH0013	0.849315	0.79661	0.813953	0.794702	0.788618	0.850427	0.814208	0.863636	0.785714	0.881988	0.831522	0.828947	0	0.803109	0.863946	0.870057	0.833333	0.867188	0.849624	0.90411	0.891304	0.728	0.754386	0.780142	0.809783	0.84472	0.804233	0.769231	0.875	0.807229	0.835294	0.777778	0.869565	0.818681	0.846591	0.909091	0.786517	0.800995	0.770186	0.812121	0.80102	0.8	0.820106	0.84153	0.787097	0.771186	0.823171	0.834646	0.748387
MH0014	0.725714	0.686275	0.772512	0.746032	0.785714	0.655602	0.723005	0.835227	0.697778	0.776042	0.726415	0.742188	0.803109	0	0.793478	0.819444	0.73262	0.882682	0.769231	0.880208	0.761905	0.763006	0.813253	0.805263	0.688995	0.73822	0.693023	0.832636	0.715789	0.709184	0.715736	0.655022	0.889474	0.708134	0.722772	0.806763	0.684466	0.786885	0.795238	0.757426	0.781513	0.795349	0.676191	0.710145	0.753846	0.837209	0.747475	0.84	0.742424
MH0015	0.822222	0.866667	0.825301	0.876623	0.939394	0.864629	0.893617	0.844262	0.849246	0.882353	0.861878	0.837838	0.863946	0.793478	0	0.895954	0.831081	0.969697	0.866142	0.921429	0.883721	0.863636	0.882353	0.891157	0.894737	0.82	0.839572	0.837838	0.86076	0.847561	0.875	0.85446	0.886364	0.880435	0.817073	0.85625	0.823864	0.845771	0.803798	0.801282	0.881188	0.892046	0.849462	0.82659	0.822368	0.857143	0.765101	0.860656	0.782895
MH0016	0.807453	0.820896	0.836735	0.816092	0.823129	0.804082	0.795	0.89172	0.809091	0.847458	0.810945	0.845238	0.870057	0.819444	0.895954	0	0.781065	0.909677	0.770833	0.828025	0.82	0.85625	0.900662	0.840237	0.802956	0.846154	0.786408	0.753769	0.816667	0.825397	0.819149	0.869388	0.846154	0.798995	0.805263	0.832432	0.873239	0.886555	0.837696	0.804348	0.873913	0.898551	0.834906	0.789744	0.815643	0.842466	0.863874	0.883117	0.840426
MH0017	0.711111	0.803279	0.727273	0.721088	0.769841	0.755656	0.718391	0.8	0.755102	0.776316	0.758427	0.775785	0.833333	0.73262	0.831081	0.781065	0	0.820312	0.748031	0.797101	0.830882	0.79562	0.786885	0.681481	0.756906	0.78481	0.759358	0.776596	0.78882	0.807018	0.732919	0.754808	0.8	0.751412	0.733333	0.821429	0.766667	0.800971	0.771084	0.713376	0.764103	0.806818	0.762162	0.768362	0.772152	0.762295	0.740506	0.806202	0.717949
MH0018	0.904	0.923077	0.876623	0.93662	0.907407	0.898148	0.8	0.855769	0.875	0.808	0.898204	0.907407	0.867188	0.882682	0.969697	0.909677	0.820312	0	0.910714	0.925	0.920354	0.933333	0.95283	0.923664	0.887574	0.945578	0.765823	0.884393	0.96732	0.89404	0.848276	0.861538	0.842593	0.857143	0.875817	0.912162	0.79085	0.852459	0.871622	0.869863	0.866667	0.876623	0.829268	0.793333	0.801527	0.871287	0.867133	0.906542	0.86014
MH0019	0.884615	0.8125	0.839744	0.830882	0.844037	0.828571	0.852071	0.885965	0.831522	0.862319	0.814815	0.815534	0.849624	0.769231	0.866142	0.770833	0.748031	0.910714	0	0.886179	0.796296	0.847458	0.833333	0.81746	0.819277	0.827338	0.805882	0.824561	0.797101	0.80137	0.817568	0.844221	0.900826	0.77707	0.783784	0.865772	0.844311	0.876289	0.863636	0.79021	0.828729	0.847134	0.795181	0.811321	0.821429	0.87037	0.811189	0.883929	0.795775
MH0020	0.80315	0.791411	0.81761	0.805755	0.843478	0.86036	0.824561	0.910569	0.837696	0.794118	0.808383	0.859091	0.90411	0.880208	0.921429	0.828025	0.797101	0.925	0.886179	0	0.904	0.882812	0.904348	0.885714	0.762195	0.843537	0.888889	0.837989	0.854305	0.855346	0.903614	0.902778	0.861789	0.894444	0.859756	0.91358	0.888889	0.880597	0.869565	0.77551	0.865285	0.880952	0.837079	0.867052	0.875817	0.848214	0.770833	0.881356	0.873418
MH0021	0.84	0.75	0.882716	0.87234	0.8	0.788177	0.865497	0.905172	0.837838	0.886525	0.792453	0.809756	0.891304	0.761905	0.883721	0.82	0.830882	0.920354	0.796296	0.904	0	0.807018	0.88785	0.835938	0.790123	0.801471	0.812866	0.851429	0.805755	0.833333	0.817568	0.80829	0.900826	0.792453	0.807947	0.842466	0.79375	0.91	0.856209	0.854305	0.84153	0.839744	0.780488	0.788462	0.846154	0.859813	0.866667	0.831776	0.882353
MH0022	0.762295	0.775	0.845679	0.690476	0.777778	0.776699	0.780488	0.863248	0.729885	0.835714	0.705882	0.768473	0.728	0.763006	0.863636	0.85625	0.79562	0.933333	0.847458	0.882812	0.807018	0	0.737374	0.663793	0.797619	0.858108	0.8125	0.803468	0.735294	0.678832	0.839744	0.757895	0.888	0.777778	0.815287	0.848684	0.740506	0.782609	0.801324	0.79054	0.808743	0.801282	0.766467	0.818182	0.836735	0.780952	0.777778	0.809091	0.735714
MH0023	0.824561	0.852564	0.835616	0.766667	0.838384	0.859223	0.78	0.873786	0.847458	0.876923	0.801324	0.863415	0.754386	0.813253	0.882353	0.900662	0.786885	0.95283	0.833333	0.904348	0.88785	0.737374	0	0.810345	0.858025	0.830769	0.870588	0.841463	0.834587	0.836879	0.836879	0.84127	0.93913	0.86875	0.858108	0.879433	0.855346	0.830508	0.828571	0.826087	0.870787	0.85906	0.796178	0.880503	0.850746	0.78022	0.78626	0.747253	0.832117
MH0024	0.80292	0.777778	0.863636	0.755245	0.811475	0.755869	0.747059	0.850394	0.728261	0.842105	0.744048	0.753555	0.780142	0.805263	0.891157	0.840237	0.681481	0.923664	0.81746	0.885714	0.835938	0.663793	0.810345	0	0.757225	0.802632	0.861538	0.829787	0.79085	0.795031	0.802469	0.761194	0.8125	0.705522	0.707792	0.81761	0.767442	0.809045	0.845238	0.753247	0.751351	0.734177	0.809783	0.804598	0.805195	0.844262	0.847561	0.848	0.741722
MH0025	0.794286	0.645503	0.818182	0.743017	0.728477	0.756972	0.755981	0.877907	0.58794	0.732954	0.605405	0.702929	0.809783	0.688995	0.894737	0.802956	0.756906	0.887574	0.819277	0.762195	0.790123	0.797619	0.858025	0.757225	0	0.755435	0.825327	0.802691	0.778947	0.764103	0.73822	0.724138	0.843023	0.759615	0.691489	0.813131	0.730392	0.786325	0.806931	0.768041	0.682465	0.706806	0.801802	0.802817	0.790576	0.825	0.710383	0.902299	0.784615
MH0026	0.737589	0.801075	0.824176	0.792453	0.847826	0.797414	0.792553	0.814815	0.76	0.841463	0.756906	0.816239	0.84472	0.73822	0.82	0.846154	0.78481	0.945578	0.827338	0.843537	0.801471	0.858108	0.830769	0.802632	0.755435	0	0.848781	0.787565	0.740506	0.731707	0.804598	0.771028	0.822695	0.790323	0.768786	0.865169	0.797872	0.821596	0.783626	0.751515	0.833333	0.849462	0.811225	0.731429	0.785276	0.816794	0.754601	0.784615	0.8
MH0027	0.79558	0.793578	0.754902	0.834171	0.869318	0.791667	0.758139	0.802395	0.758621	0.820513	0.784404	0.785441	0.804233	0.693023	0.839572	0.786408	0.759358	0.765823	0.805882	0.888889	0.812866	0.8125	0.870588	0.861538	0.825327	0.848781	0	0.776786	0.839806	0.772277	0.766169	0.747934	0.836158	0.761682	0.753695	0.807882	0.702439	0.782427	0.784314	0.805825	0.817427	0.850679	0.7	0.734299	0.740741	0.78125	0.814634	0.835294	0.715789
MH0028	0.8	0.791667	0.727273	0.776596	0.854651	0.825926	0.732057	0.862069	0.734513	0.806283	0.771028	0.837638	0.769231	0.832636	0.837838	0.753769	0.776596	0.884393	0.824561	0.837989	0.851429	0.803468	0.841463	0.829787	0.802691	0.787565	0.776786	0	0.838235	0.805825	0.817308	0.776423	0.860335	0.825893	0.816038	0.79397	0.8	0.759657	0.725389	0.755102	0.835391	0.859729	0.74537	0.761905	0.764398	0.754839	0.782828	0.819277	0.813725
MH0030	0.777027	0.758242	0.857895	0.773585	0.772727	0.723982	0.729282	0.883562	0.757426	0.778481	0.733333	0.744395	0.875	0.715789	0.86076	0.816667	0.78882	0.96732	0.797101	0.854305	0.805755	0.735294	0.834587	0.79085	0.778947	0.740506	0.839806	0.838235	0	0.656051	0.758823	0.745283	0.85034	0.76087	0.721893	0.794118	0.819588	0.834862	0.846994	0.777778	0.753769	0.752874	0.731183	0.783784	0.766871	0.902778	0.766467	0.866197	0.714286
MH0031	0.766234	0.756614	0.829016	0.692308	0.751825	0.75641	0.715054	0.829932	0.7	0.797619	0.725807	0.743478	0.807229	0.709184	0.847561	0.825397	0.807018	0.89404	0.80137	0.855346	0.833333	0.678832	0.836879	0.795031	0.764103	0.731707	0.772277	0.805825	0.656051	0	0.742857	0.738532	0.880503	0.796954	0.735955	0.836956	0.740741	0.788018	0.75	0.775281	0.787736	0.797872	0.717278	0.755319	0.742515	0.856164	0.720238	0.827586	0.698795
MH0032	0.782051	0.763158	0.846939	0.785714	0.778571	0.751073	0.742105	0.853333	0.779343	0.745342	0.690608	0.709821	0.835294	0.715736	0.875	0.819149	0.732919	0.848276	0.817568	0.903614	0.817568	0.839744	0.836879	0.802469	0.73822	0.804598	0.766169	0.817308	0.758823	0.742857	0	0.70892	0.880503	0.725807	0.714286	0.811111	0.713514	0.747619	0.810811	0.815217	0.764423	0.758242	0.73057	0.8	0.711656	0.886667	0.764368	0.851351	0.758621
MH0033	0.775	0.705357	0.819328	0.730392	0.797872	0.708955	0.721739	0.841837	0.670886	0.770335	0.684685	0.716418	0.777778	0.655022	0.85446	0.869388	0.754808	0.861538	0.844221	0.902778	0.80829	0.757895	0.84127	0.761194	0.724138	0.771028	0.747934	0.776423	0.745283	0.738532	0.70892	0	0.890476	0.684685	0.697674	0.825327	0.655963	0.675	0.714953	0.747706	0.655172	0.699074	0.678414	0.709821	0.75	0.812834	0.761468	0.852041	0.74537
MH0034	0.816	0.877907	0.864197	0.817518	0.868421	0.873303	0.791411	0.828829	0.827957	0.896552	0.866279	0.851163	0.869565	0.889474	0.886364	0.846154	0.8	0.842593	0.900826	0.861789	0.900826	0.888	0.93913	0.8125	0.843023	0.822695	0.836158	0.860335	0.85034	0.880503	0.880503	0.890476	0	0.839286	0.803922	0.821918	0.860465	0.866667	0.866242	0.802721	0.850267	0.878049	0.872222	0.836364	0.841379	0.77451	0.876623	0.857143	0.87013
MH0035	0.830508	0.758621	0.869767	0.772222	0.787097	0.737705	0.763285	0.847561	0.768889	0.783333	0.76699	0.73029	0.818681	0.708134	0.880435	0.798995	0.751412	0.857143	0.77707	0.894444	0.792453	0.777778	0.86875	0.705522	0.759615	0.790323	0.761682	0.825893	0.76087	0.796954	0.725807	0.684685	0.839286	0	0.719577	0.790576	0.718593	0.77193	0.784615	0.769633	0.682692	0.734375	0.752381	0.725888	0.786096	0.878049	0.810256	0.873494	0.786458
MH0036	0.757962	0.736842	0.827411	0.805714	0.79452	0.740425	0.708995	0.827815	0.681592	0.760479	0.712766	0.716157	0.846591	0.722772	0.817073	0.805263	0.733333	0.875817	0.783784	0.859756	0.807947	0.815287	0.858108	0.707792	0.691489	0.768786	0.753695	0.816038	0.721893	0.735955	0.714286	0.697674	0.803922	0.719577	0	0.769663	0.686486	0.798206	0.803191	0.788044	0.728155	0.758065	0.71134	0.742105	0.74269	0.883117	0.777778	0.88535	0.737143
MH0037	0.842767	0.807292	0.877551	0.835294	0.81295	0.817427	0.780105	0.855172	0.796208	0.804878	0.809278	0.805907	0.909091	0.806763	0.85625	0.832432	0.821429	0.912162	0.865772	0.91358	0.842466	0.848684	0.879433	0.81761	0.813131	0.865169	0.807882	0.79397	0.794118	0.836956	0.811111	0.825327	0.821918	0.790576	0.769663	0	0.84	0.821101	0.836956	0.860215	0.78744	0.777778	0.810945	0.818653	0.8	0.904762	0.845304	0.899329	0.806818
MH0038	0.769231	0.783654	0.803922	0.793478	0.796178	0.728395	0.740196	0.848485	0.724771	0.757062	0.69898	0.762097	0.786517	0.684466	0.823864	0.873239	0.766667	0.79085	0.844311	0.888889	0.79375	0.740506	0.855346	0.767442	0.730392	0.797872	0.702439	0.8	0.819588	0.740741	0.713514	0.655963	0.860465	0.718593	0.686486	0.84	0	0.58794	0.766839	0.757895	0.75	0.767677	0.678392	0.74	0.733333	0.814103	0.767196	0.887574	0.692737
MH0039	0.857843	0.769911	0.788288	0.771144	0.855615	0.767528	0.752212	0.850267	0.747934	0.703704	0.727273	0.74717	0.800995	0.786885	0.845771	0.886555	0.800971	0.852459	0.876289	0.880597	0.91	0.782609	0.830508	0.809045	0.786325	0.821596	0.782427	0.759657	0.834862	0.788018	0.747619	0.675	0.866667	0.77193	0.798206	0.821101	0.58794	0	0.804546	0.768868	0.755187	0.760369	0.747826	0.785088	0.812207	0.839779	0.759615	0.860963	0.742718
MH0040	0.782051	0.782383	0.829016	0.778443	0.787234	0.826613	0.768041	0.868421	0.75	0.825581	0.809045	0.839357	0.770186	0.795238	0.803798	0.837696	0.771084	0.871622	0.863636	0.869565	0.856209	0.801324	0.828571	0.845238	0.806931	0.783626	0.784314	0.725389	0.846994	0.75	0.810811	0.714953	0.866242	0.784615	0.803191	0.836956	0.766839	0.804546	0	0.782123	0.758454	0.829016	0.775	0.768421	0.75	0.762963	0.735294	0.819444	0.714286
MH0041	0.754967	0.780105	0.782609	0.7375	0.818182	0.775424	0.711956	0.811189	0.759615	0.837209	0.736559	0.794118	0.812121	0.757426	0.801282	0.804348	0.713376	0.869863	0.79021	0.77551	0.854305	0.79054	0.826087	0.753247	0.768041	0.751515	0.805825	0.755102	0.777778	0.775281	0.815217	0.747706	0.802721	0.769633	0.788044	0.860215	0.757895	0.768868	0.782123	0	0.743842	0.802139	0.760204	0.765957	0.769231	0.740458	0.732143	0.825175	0.72619
MH0042	0.811518	0.740741	0.831111	0.770408	0.754491	0.743295	0.733945	0.882353	0.69163	0.816832	0.760181	0.716535	0.80102	0.781513	0.881188	0.873913	0.764103	0.866667	0.828729	0.865285	0.84153	0.808743	0.870787	0.751351	0.682465	0.833333	0.817427	0.835391	0.753769	0.787736	0.764423	0.655172	0.850267	0.682692	0.728155	0.78744	0.75	0.755187	0.758454	0.743842	0	0.36646	0.773913	0.790179	0.800971	0.885246	0.764706	0.91623	0.789474
MH0043	0.860465	0.724868	0.857143	0.77193	0.770833	0.752101	0.781095	0.89441	0.739336	0.790698	0.721053	0.722944	0.8	0.795349	0.892046	0.898551	0.806818	0.876623	0.847134	0.880952	0.839744	0.801282	0.85906	0.734177	0.706806	0.849462	0.850679	0.859729	0.752874	0.797872	0.758242	0.699074	0.878049	0.734375	0.758065	0.777778	0.767677	0.760369	0.829016	0.802139	0.36646	0	0.804762	0.823529	0.813187	0.91195	0.811828	0.893082	0.786885
MH0044	0.69697	0.767772	0.78744	0.768817	0.826347	0.725807	0.68	0.874286	0.738938	0.792553	0.728155	0.749004	0.820106	0.676191	0.849462	0.834906	0.762162	0.829268	0.795181	0.837079	0.780488	0.766467	0.796178	0.809783	0.801802	0.811225	0.7	0.74537	0.731183	0.717278	0.73057	0.678414	0.872222	0.752381	0.71134	0.810945	0.678392	0.747826	0.775	0.760204	0.773913	0.804762	0	0.717822	0.756614	0.822086	0.723404	0.846154	0.718085
MH0045	0.756098	0.791262	0.79397	0.834225	0.885542	0.729167	0.695876	0.776316	0.713615	0.690909	0.757426	0.802372	0.84153	0.710145	0.82659	0.789744	0.768362	0.793333	0.811321	0.867052	0.788462	0.818182	0.880503	0.804598	0.802817	0.731429	0.734299	0.761905	0.783784	0.755319	0.8	0.709821	0.836364	0.725888	0.742105	0.818653	0.74	0.785088	0.768421	0.765957	0.790179	0.823529	0.717822	0	0.666667	0.824675	0.813472	0.812903	0.776596
MH0046	0.77551	0.763736	0.793296	0.824242	0.824817	0.772926	0.727778	0.851064	0.730965	0.77707	0.731844	0.807692	0.787097	0.753846	0.822368	0.815643	0.772152	0.801527	0.821429	0.875817	0.846154	0.836735	0.850746	0.805195	0.790576	0.785276	0.740741	0.764398	0.766871	0.742515	0.711656	0.75	0.841379	0.786096	0.74269	0.8	0.733333	0.812207	0.75	0.769231	0.800971	0.813187	0.756614	0.666667	0	0.801527	0.786982	0.84058	0.720497
MH0047	0.776786	0.840764	0.755396	0.782258	0.854369	0.893023	0.768212	0.821782	0.817143	0.879699	0.797386	0.902326	0.771186	0.837209	0.857143	0.842466	0.762295	0.871287	0.87037	0.848214	0.859813	0.780952	0.78022	0.844262	0.825	0.816794	0.78125	0.754839	0.902778	0.856164	0.886667	0.812834	0.77451	0.878049	0.883117	0.904762	0.814103	0.839779	0.762963	0.740458	0.885246	0.91195	0.822086	0.824675	0.801527	0	0.8	0.755319	0.827338
MH0048	0.724138	0.795812	0.798913	0.690789	0.797101	0.842105	0.748663	0.823944	0.718593	0.806061	0.745946	0.770563	0.823171	0.747475	0.765101	0.863874	0.740506	0.867133	0.811189	0.770833	0.866667	0.777778	0.78626	0.847561	0.710383	0.754601	0.814634	0.782828	0.766467	0.720238	0.764368	0.761468	0.876623	0.810256	0.777778	0.845304	0.767196	0.759615	0.735294	0.732143	0.764706	0.811828	0.723404	0.813472	0.786982	0.8	0	0.829787	0.721212
MH0049	0.833333	0.850932	0.802721	0.842105	0.919643	0.868545	0.833333	0.792079	0.870968	0.890511	0.816456	0.850962	0.834646	0.84	0.860656	0.883117	0.806202	0.906542	0.883929	0.881356	0.831776	0.809091	0.747253	0.848	0.902299	0.784615	0.835294	0.819277	0.866197	0.827586	0.851351	0.852041	0.857143	0.873494	0.88535	0.899329	0.887574	0.860963	0.819444	0.825175	0.91623	0.893082	0.846154	0.812903	0.84058	0.755319	0.829787	0	0.830986
MH0050	0.776316	0.790576	0.825397	0.795181	0.789855	0.783898	0.72973	0.841379	0.738916	0.792683	0.71978	0.776824	0.748387	0.742424	0.782895	0.840426	0.717949	0.86014	0.795775	0.873418	0.882353	0.735714	0.832117	0.741722	0.784615	0.8	0.715789	0.813725	0.714286	0.698795	0.758621	0.74537	0.87013	0.786458	0.737143	0.806818	0.692737	0.742718	0.714286	0.72619	0.789474	0.786885	0.718085	0.776596	0.720497	0.827338	0.721212	0.830986	0
MH0051	0.863014	0.80791	0.839081	0.783784	0.833333	0.808036	0.844086	0.861538	0.751323	0.805369	0.782857	0.761682	0.84	0.807292	0.892617	0.848837	0.807947	0.940741	0.752066	0.871429	0.847328	0.763779	0.803419	0.768116	0.76	0.857143	0.808511	0.831579	0.769737	0.74359	0.804878	0.763547	0.907801	0.79661	0.735849	0.834356	0.804469	0.810945	0.867052	0.831325	0.786458	0.804734	0.785714	0.852459	0.84472	0.874016	0.783439	0.832	0.807453
MH0052	0.814569	0.795699	0.862434	0.801242	0.769231	0.77193	0.747253	0.940789	0.736041	0.783439	0.816754	0.780702	0.793548	0.765306	0.927711	0.853261	0.815951	0.885714	0.861111	0.903846	0.828571	0.776978	0.866667	0.78	0.763441	0.813253	0.820896	0.769633	0.757764	0.763314	0.72561	0.777778	0.840278	0.797872	0.763006	0.84	0.77957	0.8	0.791907	0.817143	0.77	0.771429	0.824121	0.81383	0.801205	0.852941	0.853933	0.895833	0.794118
MH0053	0.823944	0.84153	0.908602	0.793333	0.816	0.803571	0.826087	0.943262	0.80303	0.888199	0.861702	0.817778	0.833333	0.783069	0.915033	0.888268	0.839744	0.941176	0.874074	0.910959	0.890511	0.725807	0.844262	0.751825	0.840426	0.865031	0.863636	0.873737	0.763158	0.783951	0.861272	0.811321	0.908451	0.79096	0.790419	0.869823	0.862434	0.888889	0.834319	0.885714	0.824121	0.819767	0.812834	0.85946	0.852761	0.900763	0.836364	0.902985	0.85119
MH0054	0.817647	0.788177	0.820896	0.856383	0.833333	0.782258	0.77451	0.910714	0.71564	0.747059	0.734694	0.728814	0.87027	0.79452	0.816568	0.840796	0.778409	0.866242	0.822785	0.830303	0.8375	0.843373	0.892405	0.80814	0.752475	0.822581	0.766667	0.793427	0.745763	0.777778	0.744565	0.756522	0.861446	0.807692	0.703297	0.756906	0.742424	0.808696	0.821429	0.807292	0.78733	0.815	0.763285	0.75	0.684524	0.873418	0.771739	0.922619	0.731844
MH0055	0.754601	0.715026	0.828431	0.780899	0.765101	0.7173	0.720812	0.814103	0.712264	0.735294	0.691099	0.772358	0.780347	0.739336	0.877778	0.756614	0.807692	0.875	0.839506	0.839286	0.81761	0.732026	0.843137	0.760479	0.760976	0.805405	0.757143	0.78972	0.782609	0.733696	0.71978	0.731278	0.883041	0.77451	0.779487	0.865	0.71282	0.756757	0.773684	0.744565	0.778281	0.786802	0.788732	0.679144	0.710983	0.807947	0.793651	0.841772	0.713483
MH0056	0.798781	0.79602	0.760638	0.728916	0.805369	0.768595	0.757576	0.822368	0.740566	0.819209	0.688172	0.796748	0.794118	0.75	0.840237	0.801047	0.728916	0.877419	0.810458	0.840491	0.840764	0.794872	0.8125	0.77439	0.728205	0.735294	0.756098	0.765854	0.782123	0.772973	0.786096	0.688372	0.821656	0.715789	0.718232	0.824468	0.723958	0.732394	0.752747	0.714286	0.730769	0.767196	0.788462	0.782828	0.780899	0.765957	0.806452	0.835526	0.761111
MH0057	0.854015	0.858757	0.830303	0.8125	0.913386	0.878261	0.795322	0.831933	0.847716	0.842466	0.778443	0.882096	0.829787	0.829787	0.885714	0.888235	0.828767	0.781818	0.890625	0.826772	0.88189	0.816	0.81982	0.881944	0.863388	0.863636	0.778409	0.823204	0.880503	0.852761	0.83125	0.836538	0.867188	0.885246	0.902857	0.90303	0.80814	0.795812	0.866667	0.79085	0.862944	0.830303	0.808989	0.844828	0.804054	0.792793	0.825806	0.838983	0.78808
MH0058	0.810526	0.697115	0.830357	0.823529	0.856354	0.712598	0.726852	0.850829	0.771784	0.753927	0.7	0.710318	0.835821	0.748918	0.852041	0.8	0.730159	0.865922	0.814607	0.864583	0.840659	0.820652	0.823529	0.743169	0.73516	0.761421	0.79661	0.784483	0.777228	0.792453	0.68718	0.751004	0.849462	0.71831	0.774648	0.815166	0.754545	0.733051	0.814815	0.748768	0.720524	0.734299	0.756637	0.738318	0.738461	0.865922	0.827103	0.842697	0.782609
MH0059	0.798969	0.780702	0.766055	0.777228	0.763006	0.789855	0.706422	0.844086	0.682609	0.737113	0.755556	0.68254	0.812808	0.766667	0.816326	0.837719	0.733333	0.870968	0.858639	0.846154	0.840426	0.814815	0.810345	0.796954	0.720721	0.78744	0.777311	0.759657	0.760976	0.765258	0.759434	0.696721	0.842932	0.75	0.764977	0.787736	0.762115	0.735537	0.765258	0.73913	0.728814	0.748837	0.753247	0.779736	0.753695	0.8	0.735294	0.810056	0.778302
MH0060	0.82659	0.747475	0.872641	0.780899	0.789474	0.759184	0.764706	0.850932	0.706161	0.805556	0.77451	0.725738	0.787356	0.721154	0.883978	0.853658	0.723529	0.909091	0.802548	0.872832	0.825	0.74026	0.858065	0.647059	0.748768	0.758427	0.808219	0.78972	0.705202	0.773684	0.798969	0.736842	0.80625	0.717949	0.713514	0.823834	0.781553	0.8	0.798969	0.803109	0.767123	0.768041	0.8	0.800971	0.794595	0.831169	0.806283	0.841772	0.78836
MH0061	0.932203	0.924528	0.974684	0.897638	0.980952	0.924171	0.932927	0.92	0.923077	0.977778	0.951515	0.933649	0.901639	0.938202	0.893805	0.946667	0.931298	0.94898	0.89	0.936937	0.92233	0.916667	0.969072	0.849557	0.94012	0.925373	0.936416	0.929412	0.957447	0.95302	0.909091	0.865591	0.914286	0.876623	0.866197	0.920863	0.884615	0.930107	0.901408	0.907801	0.877907	0.875	0.889571	0.888889	0.918519	0.97	0.89781	0.94	0.898551
MH0062	0.870748	0.883598	0.83237	0.86076	0.877863	0.868644	0.792135	0.806452	0.795918	0.866242	0.79661	0.857759	0.8	0.825641	0.885135	0.868571	0.83871	0.874016	0.864662	0.855073	0.864662	0.828358	0.88	0.835616	0.807692	0.857143	0.821053	0.825397	0.859756	0.804878	0.840237	0.799043	0.884058	0.823204	0.844828	0.920454	0.784091	0.845411	0.867052	0.817073	0.835	0.818713	0.854922	0.813559	0.8375	0.827869	0.80625	0.832	0.792453
MH0063	0.75641	0.708108	0.814433	0.761905	0.703704	0.700441	0.740933	0.893082	0.724638	0.766467	0.757732	0.726087	0.790419	0.688775	0.890805	0.829016	0.716049	0.844595	0.79054	0.851852	0.782313	0.798701	0.825175	0.777778	0.703704	0.808989	0.770732	0.820755	0.735294	0.755556	0.674556	0.677725	0.825806	0.71123	0.668605	0.782123	0.726316	0.752336	0.762431	0.806452	0.751196	0.756757	0.742424	0.785714	0.72619	0.836735	0.796703	0.84	0.810811
MH0064	0.791139	0.80203	0.77957	0.734568	0.837838	0.798354	0.736842	0.718518	0.745192	0.84	0.753927	0.811475	0.779141	0.748768	0.819876	0.85641	0.734568	0.872483	0.826667	0.834395	0.871795	0.778524	0.81295	0.773585	0.819512	0.8125	0.773399	0.783251	0.795454	0.758427	0.79235	0.784141	0.822368	0.747368	0.751381	0.837838	0.792929	0.754717	0.772222	0.726744	0.81106	0.798942	0.782178	0.75	0.744048	0.816901	0.793296	0.8125	0.738372
MH0065	0.857143	0.74359	0.825871	0.770115	0.777027	0.735294	0.761194	0.855346	0.695652	0.745562	0.733333	0.665179	0.824859	0.741627	0.822485	0.857143	0.741177	0.835526	0.79085	0.814815	0.814103	0.783439	0.90566	0.763636	0.692708	0.815217	0.783019	0.820276	0.715116	0.729282	0.743169	0.76087	0.810127	0.733333	0.679775	0.839378	0.708333	0.78125	0.763441	0.767568	0.734597	0.764398	0.779904	0.767677	0.735632	0.850649	0.721591	0.895706	0.686047
MH0066	0.789116	0.774725	0.843243	0.769231	0.856115	0.817797	0.798942	0.857143	0.784314	0.819876	0.796791	0.779736	0.84472	0.795	0.858065	0.846154	0.745098	0.884892	0.843972	0.888889	0.852113	0.792857	0.874074	0.761905	0.819588	0.860465	0.81407	0.774869	0.779141	0.790698	0.837989	0.793578	0.830986	0.743017	0.775862	0.790419	0.791444	0.763547	0.837989	0.802326	0.762626	0.763006	0.835	0.8	0.814371	0.860294	0.853107	0.92517	0.820809
MH0067	0.836879	0.819209	0.823529	0.866242	0.875969	0.827434	0.79661	0.803279	0.818182	0.751773	0.801136	0.799087	0.904459	0.829897	0.875862	0.804878	0.710145	0.844262	0.788618	0.861314	0.862595	0.884892	0.913386	0.773723	0.798883	0.8625	0.819149	0.835979	0.814103	0.831325	0.779874	0.830986	0.839695	0.814607	0.740506	0.832298	0.828729	0.876777	0.858823	0.807453	0.850746	0.837209	0.816216	0.731707	0.756757	0.844262	0.861446	0.829268	0.774193
MH0068	0.758865	0.829787	0.80791	0.788462	0.885714	0.840336	0.72	0.723577	0.75	0.816456	0.745763	0.858333	0.849057	0.81	0.862745	0.775148	0.74	0.890511	0.848921	0.798561	0.881119	0.814286	0.88806	0.79054	0.791444	0.770701	0.780105	0.744565	0.853801	0.828571	0.841808	0.839286	0.827338	0.806452	0.806818	0.924324	0.81383	0.857143	0.80117	0.707006	0.830918	0.87766	0.820513	0.688623	0.78125	0.784	0.75	0.834587	0.824561
MH0069	0.77665	0.711712	0.785088	0.762136	0.793478	0.733333	0.711111	0.838542	0.693277	0.741294	0.628571	0.697318	0.773399	0.683983	0.834951	0.818182	0.737624	0.858639	0.804233	0.863415	0.816754	0.745946	0.812155	0.775	0.713656	0.778302	0.676991	0.757322	0.70936	0.71564	0.658416	0.663934	0.866337	0.696833	0.71028	0.784404	0.698198	0.707819	0.71564	0.766055	0.705882	0.729358	0.684444	0.704546	0.695	0.846561	0.745283	0.836842	0.651515
MH0070	0.760479	0.8	0.772727	0.751412	0.802548	0.787402	0.72	0.780645	0.729358	0.790055	0.73	0.785714	0.74269	0.695652	0.795322	0.774359	0.676647	0.857143	0.814815	0.836257	0.870588	0.730769	0.839744	0.744048	0.753623	0.803191	0.755869	0.753555	0.793651	0.739362	0.790816	0.724891	0.796296	0.723618	0.739583	0.821429	0.712121	0.727273	0.752632	0.736559	0.760181	0.778895	0.769953	0.706186	0.738889	0.805195	0.759358	0.845679	0.683616
MH0071	0.852113	0.797688	0.801205	0.787671	0.769231	0.842105	0.854054	0.971631	0.823232	0.88535	0.764706	0.845815	0.852349	0.852792	0.882759	0.78882	0.81208	0.90625	0.816	0.789062	0.84375	0.842105	0.867769	0.848276	0.763006	0.847134	0.883838	0.776536	0.857143	0.844311	0.823171	0.819048	0.873134	0.846154	0.821429	0.873494	0.871658	0.848781	0.815951	0.743421	0.85	0.888268	0.864583	0.881081	0.849057	0.793103	0.810127	0.908397	0.875
MH0072	0.777027	0.791444	0.820652	0.773585	0.890411	0.810127	0.75	0.765151	0.799043	0.823171	0.747253	0.823529	0.875	0.755102	0.831169	0.789773	0.765823	0.887324	0.761194	0.861842	0.863014	0.780142	0.834587	0.814103	0.822335	0.815476	0.774359	0.790816	0.745342	0.766082	0.801136	0.8125	0.834483	0.824742	0.729412	0.815029	0.813472	0.824074	0.846994	0.740964	0.86758	0.863874	0.731183	0.756906	0.781818	0.871429	0.77381	0.798508	0.760479
MH0073	0.846626	0.823232	0.782609	0.839081	0.880795	0.820408	0.796954	0.811189	0.843049	0.742138	0.813131	0.81405	0.853801	0.763547	0.859756	0.842105	0.72956	0.885135	0.846667	0.846154	0.861842	0.830065	0.897959	0.829268	0.82266	0.829546	0.834123	0.838095	0.825843	0.827957	0.775281	0.797357	0.826667	0.776042	0.807487	0.86631	0.795918	0.808219	0.815217	0.786517	0.840909	0.821053	0.853774	0.711111	0.797688	0.854167	0.836066	0.872483	0.804469
MH0074	0.930435	0.849315	0.910959	0.867769	0.905263	0.868687	0.890323	0.90625	0.877907	0.855932	0.819444	0.878788	0.92623	0.892857	0.900901	0.884892	0.838983	0.913044	0.863158	0.75	0.886598	0.882353	0.922222	0.855856	0.855263	0.889764	0.953757	0.895062	0.883721	0.866667	0.907143	0.905263	0.90099	0.917197	0.887324	0.911111	0.896774	0.917127	0.891304	0.820312	0.895349	0.864286	0.89441	0.901316	0.865079	0.913044	0.878788	0.855556	0.871212
MH0075	0.79235	0.785388	0.799065	0.794872	0.825581	0.824817	0.75576	0.833333	0.718062	0.798969	0.711538	0.792453	0.813472	0.759825	0.871795	0.800948	0.794872	0.848837	0.802326	0.836066	0.849162	0.815643	0.852941	0.840206	0.716981	0.748691	0.737557	0.699531	0.807882	0.745	0.781553	0.75102	0.851648	0.798206	0.780952	0.827751	0.77169	0.814516	0.77561	0.742424	0.819672	0.872807	0.778761	0.744076	0.718085	0.770186	0.782178	0.877095	0.765
MH0076	0.807453	0.765625	0.86	0.809249	0.861842	0.763713	0.724868	0.832215	0.758294	0.820809	0.755208	0.766949	0.816568	0.802817	0.883041	0.789189	0.759036	0.895425	0.835526	0.828025	0.850649	0.763513	0.830986	0.718954	0.778895	0.786127	0.831776	0.784314	0.754386	0.773481	0.759776	0.806034	0.791946	0.786802	0.745856	0.83871	0.817734	0.811659	0.849741	0.804348	0.822727	0.824742	0.783251	0.777202	0.767442	0.85034	0.787709	0.853333	0.815217
MH0077	0.767677	0.732456	0.793103	0.821918	0.834197	0.678161	0.697778	0.791444	0.728745	0.78673	0.671233	0.715356	0.83871	0.704641	0.831731	0.830508	0.747573	0.883838	0.794737	0.870813	0.781915	0.782383	0.834225	0.728205	0.744681	0.728155	0.720339	0.804781	0.732057	0.731482	0.719626	0.694444	0.879227	0.677273	0.702326	0.824561	0.684685	0.771318	0.798246	0.763636	0.72541	0.755556	0.688596	0.672811	0.718447	0.854922	0.75463	0.808511	0.726415
MH0078	0.761468	0.867924	0.836735	0.826772	0.778947	0.87619	0.797386	0.906542	0.821839	0.886364	0.869565	0.852941	0.882812	0.855491	0.901639	0.901316	0.788618	0.845361	0.878505	0.866071	0.938053	0.854545	0.920792	0.85124	0.830189	0.849624	0.857988	0.869823	0.790698	0.829787	0.869863	0.854167	0.828571	0.825806	0.785714	0.888112	0.87037	0.887701	0.829787	0.835714	0.811765	0.86	0.834356	0.837662	0.816794	0.88	0.832117	0.904762	0.789474
MH0079	0.777778	0.843023	0.819876	0.656	0.772727	0.866667	0.769697	0.837607	0.697674	0.814286	0.751553	0.817757	0.724409	0.833333	0.875	0.858896	0.736842	0.87069	0.860656	0.868217	0.879032	0.693694	0.780952	0.765625	0.772455	0.805556	0.835165	0.786127	0.80137	0.756757	0.812903	0.721925	0.845529	0.796407	0.840491	0.873418	0.768293	0.786096	0.773333	0.727273	0.758427	0.774193	0.838889	0.8	0.729927	0.740385	0.765517	0.854701	0.8
MH0080	0.769663	0.686567	0.756098	0.712707	0.823529	0.778626	0.741784	0.831395	0.686364	0.845	0.642857	0.767442	0.811518	0.773913	0.864583	0.78744	0.733696	0.923077	0.853933	0.827778	0.813953	0.695652	0.823171	0.740113	0.682927	0.73262	0.757848	0.714953	0.762887	0.779412	0.767327	0.678261	0.856354	0.751174	0.76699	0.853774	0.746479	0.757447	0.755	0.68617	0.756522	0.785714	0.754545	0.765258	0.780612	0.767296	0.729167	0.771605	0.756345
MH0081	0.770833	0.722727	0.769231	0.77451	0.780899	0.728302	0.65566	0.815217	0.708861	0.772277	0.730942	0.745318	0.78	0.705628	0.870192	0.78733	0.717949	0.816667	0.79235	0.86	0.798913	0.786096	0.820225	0.781726	0.778723	0.807512	0.657534	0.741379	0.776191	0.714976	0.757009	0.66805	0.827225	0.683721	0.721698	0.767772	0.691244	0.728395	0.721154	0.705882	0.688312	0.769231	0.665138	0.640777	0.700508	0.782857	0.768868	0.84492	0.670051
MH0082	0.762431	0.700483	0.737864	0.72043	0.80117	0.764259	0.69378	0.842697	0.699115	0.764398	0.684466	0.757692	0.752688	0.724444	0.794595	0.798122	0.699454	0.889503	0.8125	0.80663	0.805714	0.720238	0.807229	0.740332	0.726852	0.746114	0.72973	0.738739	0.756345	0.71066	0.748768	0.690678	0.835165	0.768182	0.760766	0.841121	0.704762	0.714286	0.663158	0.701031	0.718062	0.761905	0.737557	0.735849	0.722513	0.686275	0.709845	0.813953	0.684211
MH0083	0.777202	0.762115	0.79646	0.798077	0.845745	0.742537	0.733333	0.808743	0.766129	0.790244	0.764192	0.781818	0.792079	0.711207	0.807107	0.824561	0.730965	0.82967	0.824468	0.887805	0.848958	0.841837	0.858696	0.829268	0.799163	0.796208	0.748936	0.746781	0.764423	0.768518	0.721154	0.721116	0.851282	0.742222	0.751152	0.790698	0.720721	0.788235	0.779817	0.760563	0.802372	0.812227	0.689189	0.691589	0.638298	0.810056	0.797235	0.851064	0.734299
MH0084	0.773973	0.782609	0.757225	0.837349	0.865248	0.793103	0.733333	0.770992	0.785366	0.842424	0.744444	0.841667	0.736487	0.732984	0.836601	0.834254	0.770701	0.835821	0.80292	0.88961	0.820144	0.811189	0.804688	0.834395	0.80829	0.745223	0.746032	0.756614	0.75	0.798851	0.740964	0.777778	0.798561	0.771739	0.777143	0.82659	0.772973	0.8	0.8125	0.745455	0.828571	0.831522	0.735135	0.75419	0.682119	0.771653	0.778443	0.767442	0.734568
MH0085	0.76087	0.83871	0.767857	0.829114	0.830769	0.907631	0.735632	0.756098	0.788945	0.811688	0.768362	0.820961	0.874214	0.852941	0.866667	0.846591	0.806452	0.84375	0.909091	0.852113	0.877698	0.905405	0.867188	0.899371	0.793478	0.81875	0.813472	0.786096	0.909091	0.883333	0.864407	0.841629	0.78626	0.815217	0.816092	0.825301	0.847368	0.803922	0.817647	0.801205	0.84466	0.881081	0.791444	0.785311	0.842424	0.786885	0.790123	0.838461	0.861272
MH0086	0.744444	0.762557	0.758294	0.851675	0.843575	0.793358	0.755656	0.824859	0.713044	0.72043	0.764706	0.791822	0.824121	0.75431	0.796791	0.832579	0.787879	0.846591	0.871658	0.840426	0.821229	0.857895	0.876405	0.855721	0.73516	0.729167	0.714932	0.706422	0.845794	0.841629	0.798122	0.730612	0.843243	0.741935	0.726829	0.803828	0.713615	0.77459	0.757282	0.742574	0.763713	0.81982	0.751111	0.708134	0.782178	0.777108	0.804762	0.822857	0.782609
O2.UC-1	0.734266	0.841026	0.787709	0.757962	0.842857	0.829875	0.736264	0.746154	0.699482	0.85119	0.754098	0.852459	0.772727	0.803922	0.83871	0.816667	0.708609	0.92517	0.855172	0.846667	0.907895	0.797203	0.79845	0.732877	0.778947	0.748428	0.82266	0.746032	0.797619	0.827778	0.827778	0.79638	0.826389	0.787234	0.751445	0.873626	0.825641	0.834862	0.773256	0.791907	0.801932	0.814208	0.81407	0.790323	0.796407	0.736	0.759036	0.807407	0.767857
O2.UC-11	0.8	0.923529	0.816326	0.857143	0.946903	0.928251	0.823899	0.8	0.887701	0.880597	0.829114	0.912844	0.885496	0.83815	0.867769	0.930818	0.865672	0.838384	0.901786	0.888889	0.930435	0.868421	0.88	0.907692	0.901163	0.869565	0.853801	0.865497	0.903448	0.857143	0.833333	0.862245	0.875	0.905325	0.883871	0.905405	0.822785	0.865591	0.849315	0.822695	0.891892	0.89172	0.871345	0.786667	0.775194	0.826531	0.827338	0.843137	0.84507
O2.UC-12	0.870748	0.758823	0.825581	0.853503	0.804878	0.763889	0.785311	0.878788	0.789744	0.772414	0.768786	0.811659	0.87013	0.775401	0.892617	0.855491	0.823529	0.756522	0.829457	0.820896	0.829457	0.819549	0.870968	0.851351	0.774011	0.864197	0.775956	0.873096	0.753333	0.775	0.782609	0.799043	0.824427	0.79661	0.796407	0.789809	0.804469	0.816832	0.840237	0.817073	0.754011	0.753086	0.737143	0.786127	0.76	0.874016	0.813665	0.885496	0.8
O2.UC-13	0.835526	0.812834	0.854839	0.767742	0.838235	0.769911	0.791444	0.847826	0.783251	0.811321	0.814815	0.825532	0.878788	0.8	0.878981	0.819209	0.751634	0.892086	0.791045	0.858108	0.826087	0.8	0.889706	0.768707	0.8125	0.87931	0.80102	0.798969	0.770186	0.796512	0.775148	0.81448	0.829787	0.795699	0.760234	0.824561	0.803191	0.853211	0.843575	0.80117	0.821256	0.82967	0.810256	0.830688	0.798781	0.833333	0.83237	0.854015	0.791667
O2.UC-14	0.858209	0.875	0.803798	0.863946	0.936508	0.860986	0.825581	0.826087	0.850515	0.869863	0.843931	0.923077	0.858156	0.83871	0.914286	0.930636	0.871622	0.869565	0.887097	0.89313	0.878049	0.848	0.866071	0.917241	0.897297	0.8125	0.834254	0.770588	0.877419	0.85625	0.89759	0.80402	0.906977	0.850575	0.887574	0.907407	0.844828	0.829016	0.826923	0.801324	0.865979	0.861446	0.831461	0.753165	0.78169	0.839286	0.844156	0.853448	0.88125
O2.UC-16	0.90678	0.89172	0.838028	0.882812	0.877551	0.861386	0.821192	0.819149	0.869318	0.834711	0.842105	0.882353	0.92126	0.877193	0.933333	0.858156	0.827869	0.918367	0.836735	0.847619	0.934579	0.899083	0.855556	0.843478	0.888889	0.886364	0.893491	0.878788	0.846154	0.864286	0.895833	0.935323	0.885714	0.886076	0.853147	0.914894	0.920732	0.896175	0.910959	0.862319	0.898876	0.877551	0.884849	0.876623	0.896296	0.895833	0.859259	0.852632	0.860294
O2.UC-17	0.857143	0.904306	0.797814	0.821429	0.877551	0.882353	0.798969	0.839161	0.840183	0.790123	0.862069	0.868	0.836364	0.840376	0.85625	0.886598	0.8	0.761539	0.923567	0.871795	0.916667	0.817568	0.887324	0.894118	0.875598	0.825581	0.80198	0.762887	0.879781	0.861702	0.885417	0.835498	0.821918	0.850746	0.910448	0.837989	0.822335	0.764423	0.79096	0.745562	0.848624	0.877551	0.856459	0.787234	0.827586	0.761539	0.805714	0.820144	0.839779
O2.UC-18	0.91	0.915493	0.909774	0.921053	0.915663	0.939394	0.895105	0.94186	0.908537	0.87963	0.877698	0.92228	0.896226	0.931677	0.961538	0.93985	0.87156	0.897436	0.91954	0.925532	0.906977	0.901099	0.893333	0.87	0.888889	0.895652	0.943038	0.869863	0.92562	0.930769	0.888	0.897727	0.910112	0.901408	0.909091	0.960938	0.917241	0.916667	0.896825	0.867769	0.91358	0.901515	0.928105	0.891304	0.887931	0.837838	0.901639	0.8875	0.937008
O2.UC-19	0.803798	0.852941	0.834197	0.762195	0.835616	0.84	0.791878	0.852349	0.800926	0.883333	0.81407	0.870588	0.867816	0.833333	0.880952	0.830688	0.833333	0.907895	0.855263	0.816994	0.87013	0.83871	0.852113	0.857988	0.817734	0.796512	0.856482	0.781095	0.852459	0.783333	0.859375	0.853557	0.835526	0.854369	0.857143	0.823204	0.826733	0.803653	0.84127	0.794444	0.83105	0.834197	0.79803	0.840796	0.819209	0.822695	0.797753	0.858108	0.812155
O2.UC-20	0.886525	0.908108	0.864706	0.86	0.904762	0.843049	0.816092	0.822034	0.859297	0.834483	0.827586	0.891775	0.862069	0.871795	0.893617	0.788462	0.769784	0.824561	0.816667	0.879699	0.91603	0.825397	0.89916	0.798508	0.88172	0.878205	0.818681	0.803371	0.866242	0.866667	0.838509	0.86385	0.849206	0.847458	0.829268	0.882716	0.867403	0.861386	0.893491	0.782895	0.88	0.884393	0.847826	0.796407	0.82	0.814159	0.848101	0.877049	0.834395
O2.UC-21	0.9	0.888268	0.82716	0.887417	0.928571	0.861607	0.878453	0.876033	0.891089	0.929032	0.831395	0.918803	0.8	0.851852	0.883212	0.851852	0.88	0.87069	0.869919	0.942029	0.896825	0.821138	0.896552	0.917808	0.903743	0.890323	0.760234	0.833333	0.913044	0.891566	0.891566	0.867299	0.899225	0.883333	0.92	0.914634	0.852273	0.865	0.85	0.848101	0.921951	0.926554	0.845304	0.862069	0.84	0.830357	0.88125	0.792793	0.815789
O2.UC-22	0.959184	0.906077	0.861446	0.908497	0.984849	0.900433	0.913979	0.826087	0.890547	0.885135	0.882682	0.923077	0.889655	0.903553	0.937063	0.930636	0.915584	0.839286	0.921875	0.884615	0.921875	0.900763	0.959016	0.917241	0.903226	0.910828	0.85946	0.876344	0.951807	0.923529	0.884146	0.893023	0.872	0.876405	0.913295	0.97093	0.857954	0.87	0.910714	0.875776	0.9	0.888235	0.899471	0.861272	0.883871	0.916667	0.927711	0.909836	0.921687
O2.UC-23	0.785714	0.862069	0.826087	0.789855	0.864407	0.855856	0.811765	0.865546	0.826316	0.885135	0.809524	0.884956	0.770992	0.857143	0.857143	0.821656	0.762963	0.87931	0.868853	0.849206	0.868853	0.758621	0.813084	0.792308	0.827586	0.787234	0.846994	0.784884	0.898734	0.834395	0.849057	0.827586	0.880952	0.876405	0.832298	0.933735	0.803571	0.846939	0.763513	0.768707	0.854167	0.861446	0.869565	0.820359	0.806897	0.737864	0.763889	0.853448	0.806667
O2.UC-24	0.80137	0.842105	0.773256	0.772727	0.80916	0.864197	0.762431	0.862319	0.781095	0.852761	0.738636	0.782222	0.796053	0.773196	0.862745	0.868853	0.780645	0.874074	0.848921	0.886667	0.865248	0.742424	0.768595	0.773973	0.771739	0.801242	0.811225	0.821429	0.775	0.794118	0.76506	0.790698	0.868056	0.84375	0.786127	0.822485	0.801075	0.807692	0.835227	0.819767	0.813725	0.801136	0.789474	0.822581	0.803681	0.830769	0.75	0.816794	0.751553
O2.UC-4	0.883212	0.8	0.803798	0.886667	0.901639	0.834862	0.825581	0.815789	0.879397	0.804348	0.843931	0.83871	0.912162	0.83871	0.80315	0.871951	0.772059	0.92562	0.840336	0.867188	0.85	0.857143	0.866071	0.828358	0.860335	0.804196	0.883598	0.838889	0.832215	0.877301	0.834395	0.872038	0.872	0.816568	0.832298	0.795918	0.895604	0.835051	0.863354	0.875776	0.835979	0.861446	0.869565	0.827381	0.831081	0.87931	0.828947	0.801802	0.852564
V1.CD-1	0.896	0.948276	0.783217	0.914286	0.982906	0.928251	0.866667	0.857143	0.899471	0.880597	0.885542	0.941964	0.868217	0.883333	0.877049	0.9375	0.898551	0.838384	0.930435	0.916667	0.930435	0.897436	0.891089	0.948148	0.926136	0.901408	0.847059	0.838323	0.94702	0.916129	0.909091	0.901478	0.884956	0.930636	0.93865	0.934211	0.8375	0.821229	0.88	0.839161	0.948718	0.939024	0.890805	0.833333	0.838235	0.802083	0.891157	0.854369	0.891892
V1.CD-11	0.873134	0.88	0.845679	0.907285	0.976744	0.854545	0.863636	0.872881	0.889447	0.843972	0.848837	0.922414	0.864286	0.849462	0.880597	0.904192	0.892617	0.846847	0.876033	0.846774	0.885246	0.873016	0.903509	0.931034	0.852273	0.858108	0.838889	0.843575	0.911392	0.875776	0.889571	0.87619	0.938931	0.923913	0.886227	0.913044	0.815476	0.857143	0.85443	0.822368	0.904523	0.9	0.855556	0.818182	0.778571	0.857143	0.842105	0.86087	0.835526
V1.CD-12	0.982301	0.90411	0.881482	0.968	0.989474	0.971429	0.948718	0.922222	0.942857	0.885965	0.927152	0.924623	0.891892	0.952941	0.893204	0.934783	0.942623	0.917647	0.888889	0.940594	0.913044	0.970874	0.977012	0.946903	0.900662	0.918699	0.898089	0.836735	0.953846	0.964286	0.909774	0.93617	0.927083	0.905405	0.920863	0.905512	0.927632	0.887574	0.933824	0.882812	0.916667	0.905797	0.957055	0.925676	0.875	0.930233	0.914729	0.978495	0.923664
V1.CD-13	0.739884	0.759434	0.796208	0.797928	0.822485	0.763566	0.684729	0.780488	0.747826	0.802083	0.719807	0.785441	0.822917	0.693023	0.820652	0.863636	0.759358	0.866279	0.82659	0.882979	0.833333	0.770588	0.843373	0.806452	0.777273	0.764398	0.756757	0.776786	0.728723	0.708333	0.753769	0.763265	0.842697	0.773148	0.695876	0.80198	0.751174	0.812245	0.76	0.782178	0.776824	0.790476	0.730233	0.715686	0.72043	0.832335	0.766498	0.848837	0.773869
V1.CD-14	0.794595	0.78733	0.800926	0.796954	0.866667	0.772727	0.728972	0.854749	0.737069	0.807107	0.726415	0.798508	0.803109	0.751092	0.867347	0.861607	0.796954	0.857143	0.831461	0.862434	0.837989	0.770115	0.861272	0.823834	0.782222	0.73822	0.772926	0.708333	0.78607	0.728643	0.753695	0.737705	0.853261	0.778281	0.783019	0.866973	0.762557	0.786885	0.753695	0.810427	0.765957	0.806452	0.769911	0.716346	0.727749	0.795181	0.778325	0.812866	0.825472
V1.CD-15	0.88	0.924419	0.818792	0.884058	0.974576	0.914414	0.840491	0.792079	0.900524	0.821705	0.866667	0.928251	0.878788	0.865922	0.869919	0.890323	0.867647	0.818182	0.893805	0.881356	0.931624	0.88983	0.893204	0.933333	0.920904	0.879433	0.807229	0.819277	0.947712	0.881579	0.874172	0.869347	0.867257	0.912791	0.899371	0.913907	0.832298	0.823204	0.881579	0.825175	0.938461	0.91358	0.885714	0.857143	0.823529	0.793814	0.869863	0.787879	0.885906
V1.CD-2	0.873016	0.838509	0.89441	0.827068	0.805825	0.880184	0.783439	0.851852	0.84153	0.796875	0.854545	0.852381	0.780488	0.848315	0.93985	0.925926	0.827068	0.79798	0.876106	0.854701	0.905172	0.768518	0.90566	0.832	0.844311	0.881119	0.830409	0.842105	0.801471	0.821918	0.845638	0.847716	0.807339	0.826087	0.835526	0.839161	0.82716	0.812155	0.860927	0.85906	0.838889	0.844156	0.880682	0.851852	0.851064	0.821782	0.863946	0.929825	0.816901
V1.CD-3	0.907895	0.889474	0.883978	0.831169	0.902985	0.878151	0.897436	0.942857	0.886792	0.89441	0.867021	0.867521	0.90566	0.849246	0.907285	0.923913	0.846154	0.908397	0.820312	0.895105	0.905797	0.870504	0.914729	0.851351	0.892857	0.878049	0.874372	0.873096	0.852761	0.860465	0.819277	0.837963	0.923077	0.816667	0.864407	0.869048	0.849462	0.861905	0.886364	0.852071	0.868932	0.865169	0.854922	0.864865	0.815287	0.932836	0.876471	0.918519	0.814815
V1.CD-4	0.84507	0.857923	0.850575	0.836601	0.941606	0.87234	0.867021	0.84127	0.858537	0.91358	0.794286	0.904167	0.875817	0.835897	0.86014	0.860465	0.873418	0.955556	0.879699	0.924138	0.853846	0.834587	0.85	0.825175	0.874345	0.840764	0.85567	0.791209	0.850932	0.858823	0.858823	0.852535	0.921986	0.834254	0.875706	0.860606	0.854054	0.843902	0.891429	0.829268	0.873171	0.863636	0.859375	0.804598	0.842767	0.862903	0.811321	0.8	0.841463
V1.CD-6	0.872483	0.913265	0.834286	0.855346	0.979452	0.88843	0.820652	0.8	0.821782	0.807947	0.818681	0.8875	0.857143	0.845	0.832168	0.850575	0.794702	0.858268	0.891304	0.888889	0.914894	0.856115	0.890625	0.853333	0.847368	0.851852	0.846939	0.795699	0.901163	0.848837	0.88764	0.85	0.885714	0.908629	0.798817	0.927374	0.819672	0.84689	0.868571	0.790123	0.906977	0.891304	0.84456	0.788571	0.794872	0.84	0.837349	0.852713	0.865497
V1.CD-8	0.819277	0.806931	0.810256	0.77193	0.865385	0.839844	0.762626	0.844156	0.785388	0.857143	0.766498	0.795918	0.813953	0.817352	0.859649	0.887805	0.806818	0.869281	0.832258	0.846626	0.86875	0.769737	0.851351	0.765432	0.800971	0.824176	0.748768	0.794258	0.814208	0.784946	0.822917	0.767544	0.828025	0.79703	0.790576	0.865979	0.729167	0.766055	0.797872	0.762431	0.788018	0.822335	0.78744	0.787879	0.793296	0.806897	0.765363	0.849673	0.793478
V1.CD-9	0.943662	0.910614	0.851852	0.913907	0.952	0.92735	0.894444	0.909091	0.905473	0.834532	0.893258	0.893333	0.871429	0.918782	0.88806	0.89697	0.899329	0.876106	0.91129	0.873016	0.92	0.931818	0.949152	0.923077	0.877095	0.916129	0.893617	0.816092	0.937888	0.922156	0.888889	0.922018	0.868853	0.911602	0.89881	0.884615	0.9	0.850515	0.895706	0.8875	0.925743	0.918605	0.937824	0.878613	0.85906	0.866071	0.88535	0.916667	0.91358
V1.UC-10	0.862857	0.809756	0.78866	0.860963	0.915663	0.832685	0.902655	0.889571	0.88843	0.895288	0.881818	0.892193	0.927461	0.845815	0.828402	0.894737	0.803371	0.926829	0.898204	0.895954	0.864197	0.901734	0.925466	0.878453	0.858448	0.839572	0.847534	0.840909	0.877551	0.88835	0.88835	0.801688	0.880239	0.855814	0.875	0.85641	0.866973	0.842553	0.813472	0.829897	0.833333	0.896714	0.840183	0.820388	0.835106	0.842105	0.857143	0.895062	0.880597
V1.UC-13	0.960938	0.940476	0.873333	0.877863	0.924528	0.931507	0.883436	0.925234	0.925926	0.89313	0.888889	0.92093	0.880952	0.923077	0.918033	0.949045	0.860465	0.854167	0.927273	0.931624	0.897196	0.902655	0.908163	0.858333	0.911243	0.921429	0.889535	0.854545	0.915493	0.92053	0.883562	0.893401	0.87963	0.875	0.901961	0.878571	0.85443	0.868132	0.883562	0.881944	0.870057	0.865772	0.91954	0.900621	0.832061	0.854167	0.917808	0.933962	0.880282
V1.UC-14	0.796296	0.834951	0.758065	0.8125	0.864516	0.816	0.809756	0.827815	0.789954	0.868853	0.79	0.847059	0.819767	0.771429	0.891429	0.817708	0.763314	0.875817	0.86076	0.852761	0.846154	0.776316	0.873333	0.829412	0.811594	0.789773	0.783654	0.769608	0.84492	0.809524	0.815789	0.823529	0.826923	0.813725	0.855721	0.865285	0.808824	0.839827	0.834197	0.788044	0.792627	0.856436	0.79227	0.810945	0.812155	0.76259	0.817204	0.856209	0.842932
V1.UC-15	0.943548	0.864516	0.915584	0.933824	0.972477	0.910798	0.934911	0.835051	0.942105	0.891473	0.873418	0.915094	0.962687	0.885058	0.907563	0.898649	0.89313	0.951456	0.895238	0.930435	0.84	0.93913	0.960396	0.928571	0.91018	0.896296	0.944134	0.919075	0.914286	0.933775	0.912162	0.914573	0.918182	0.873418	0.922078	0.923611	0.959302	0.914894	0.926667	0.888112	0.881356	0.929487	0.918605	0.892405	0.921429	0.941176	0.916667	0.878788	0.953333
V1.UC-17	0.80137	0.817204	0.736527	0.756579	0.8	0.815451	0.712644	0.845588	0.73057	0.761589	0.716763	0.82906	0.811688	0.81592	0.847682	0.830508	0.722973	0.839695	0.814815	0.772059	0.857143	0.779412	0.808	0.765517	0.723164	0.762821	0.798969	0.730769	0.767296	0.76506	0.828571	0.796296	0.801471	0.8	0.786127	0.829412	0.740113	0.753769	0.757576	0.628378	0.777778	0.80791	0.789474	0.796703	0.708609	0.743802	0.717949	0.816794	0.766871
V1.UC-18	0.913669	0.867052	0.859756	0.928571	0.918033	0.884956	0.857143	0.843478	0.900497	0.86014	0.862069	0.888889	0.880282	0.873684	0.928571	0.910714	0.854167	0.867257	0.866667	0.856	0.857143	0.845529	0.903509	0.860294	0.858757	0.895425	0.851648	0.85	0.911392	0.922619	0.875776	0.912442	0.85124	0.855491	0.865854	0.878205	0.888268	0.912621	0.889571	0.874214	0.89899	0.9	0.874317	0.859649	0.852349	0.846847	0.9	0.92623	0.907407
V1.UC-19	0.851613	0.838542	0.867725	0.843373	0.895833	0.865854	0.853535	0.823529	0.862385	0.882353	0.809524	0.850622	0.872727	0.87907	0.927273	0.852459	0.8	0.884892	0.818841	0.896104	0.891157	0.873333	0.882353	0.802632	0.837564	0.853801	0.870813	0.869565	0.888268	0.88172	0.818182	0.861472	0.814286	0.803191	0.848649	0.896175	0.846939	0.859091	0.905263	0.795322	0.84434	0.843243	0.868932	0.84375	0.842105	0.843284	0.878453	0.887324	0.885246
V1.UC-21	0.818182	0.851675	0.771277	0.857923	0.849673	0.839216	0.792079	0.804054	0.816964	0.775148	0.78392	0.837945	0.89071	0.827273	0.858823	0.835897	0.709877	0.883117	0.831169	0.808917	0.915663	0.905882	0.888158	0.856322	0.811594	0.842391	0.817757	0.793269	0.819672	0.852041	0.790323	0.818565	0.87037	0.79602	0.795812	0.853403	0.826087	0.808889	0.815789	0.781421	0.809091	0.862069	0.820755	0.828431	0.831522	0.853333	0.791209	0.878205	0.798913
V1.UC-6	0.874172	0.844086	0.795322	0.857143	0.881482	0.846808	0.84127	0.830769	0.851675	0.848101	0.767046	0.793722	0.880503	0.829146	0.888158	0.89011	0.773333	0.877863	0.843284	0.842857	0.860294	0.889655	0.875	0.832215	0.824468	0.810127	0.84264	0.846939	0.820988	0.830409	0.787879	0.835616	0.820896	0.794444	0.80117	0.845238	0.846561	0.814634	0.870057	0.814371	0.838235	0.822857	0.82199	0.849462	0.805031	0.84252	0.796296	0.837209	0.840237
V1.UC-7	0.879433	0.896739	0.845238	0.860927	0.930769	0.893162	0.843575	0.888889	0.854271	0.835616	0.88587	0.911017	0.935897	0.878173	0.960265	0.895349	0.805556	0.761468	0.916667	0.846154	0.9	0.904412	0.96875	0.905405	0.832402	0.871795	0.875	0.843243	0.921687	0.913295	0.860606	0.869767	0.868217	0.879781	0.884393	0.89697	0.822857	0.839196	0.86747	0.768212	0.863636	0.897727	0.896373	0.852273	0.851613	0.875	0.849057	0.938461	0.878049
V1.UC-8	0.831395	0.855814	0.80303	0.798883	0.89697	0.815686	0.815166	0.85625	0.806167	0.79661	0.819048	0.828125	0.8125	0.788991	0.843931	0.890476	0.844086	0.8875	0.886227	0.903409	0.872727	0.78481	0.878205	0.88587	0.833333	0.816216	0.800926	0.793427	0.806452	0.809278	0.827411	0.798319	0.826087	0.807692	0.80203	0.834197	0.791262	0.803493	0.803109	0.801047	0.819383	0.832512	0.836364	0.762626	0.737143	0.851613	0.810526	0.882716	0.829897
V1.UC-9	0.904459	0.892857	0.831461	0.879518	0.973154	0.894737	0.860825	0.824427	0.842105	0.85	0.809783	0.916	0.853503	0.870192	0.882353	0.909091	0.858896	0.896296	0.917241	0.921053	0.909722	0.883562	0.902256	0.893082	0.873737	0.882353	0.826531	0.818653	0.93956	0.902174	0.858757	0.831818	0.896552	0.915842	0.881081	0.88	0.797814	0.81068	0.871508	0.837209	0.888372	0.869565	0.908654	0.832432	0.792453	0.81746	0.887006	0.857143	0.862069
[truncated: 75 more columns]
